# Supplementary material for: Oxidation processes in the Eastern Mediterranean atmosphere: Evidence from the Modelling of HO x Measurements over Cyprus
Source: Copernicus journal article supplement (doi:10.5194/acp-2018-25), 2018-02-14
Supplement: Supplementary file 1 [file acp-2018-25-supplement.zip]

Archive with 2 entries (2 files):
- meccanism.pdf
- supplement.pdf
