# Supplementary material for: Oxidation processes in the Eastern Mediterranean atmosphere: Evidence from the Modelling of HO x Measurements over Cyprus
Source: Copernicus journal article supplement (doi:10.5194/acp-2018-25), 2018-02-14
Supplement: Supplementary file 1 [file acp-2018-25-supplement.zip › meccanism.pdf]

# The Chemical Mechanism of MECCA

KPP version: 2.2.1\_rs7

MECCA version: 3.8b

Date: December 18, 2017.

Selected reactions:

“Tr && G && !Cl && !Br && !I && !Hg”

Number of aerosol phases: 0

Number of species in selected mechanism:

Gas phase: 2664

Aqueous phase: 0

All species: 2664

Number of reactions in selected mechanism:

Gas phase (Gmn): 1670

Aqueous phase (Annn): 0

Henry (Hnn): 0

Photolysis (Jnn): 324

Aqueous phase photolysis (PHnnn): 0

Heterogeneous (HETnnn): 0

Equilibria (EQnn): 0

Isotope exchange (IEXnnn): 0

Tagging equations (TAGnnn): 0

Dummy (Dnn): 0

All equations: 1994

This document is part of the electronic supplement to our article  
“Oxidation processes in the Eastern Mediterranean atmosphere:  
Evidence from the Modelling of HOx Measurements over Cyprus”  
in Atmos. Chem. Phys. (2018), available at:

<https://www.atmospheric-chemistry-and-physics.net>

Table 1: Gas phase reactions

| #     | labels   | reaction                                                                          | rate coefficient                                                                                                | reference                                             |
|-------|----------|-----------------------------------------------------------------------------------|-----------------------------------------------------------------------------------------------------------------|-------------------------------------------------------|
| G1000 | UpStTrG  | $\text{O}_2 + \text{O}(^1\text{D}) \rightarrow \text{O}(^3\text{P}) + \text{O}_2$ | $3.3\text{E}-11*\text{EXP}(55./\text{temp})$                                                                    | Sander et al. (2011)                                  |
| G1001 | UpStTrG  | $\text{O}_2 + \text{O}(^3\text{P}) \rightarrow \text{O}_3$                        | $6.\text{E}-34*((\text{temp}/300.)**(-2.4))*\text{cair}$                                                        | Sander et al. (2011)                                  |
| G2100 | UpStTrG  | $\text{H} + \text{O}_2 \rightarrow \text{HO}_2$                                   | $\text{k\_3rd}(\text{temp}, \text{cair}, 4.4\text{E}-32, 1.3, 7.5\text{E}-11, -0.2, 0.6)$                       | Sander et al. (2011)                                  |
| G2104 | UpStTrG  | $\text{OH} + \text{O}_3 \rightarrow \text{HO}_2 + \text{O}_2$                     | $1.7\text{E}-12*\text{EXP}(-940./\text{temp})$                                                                  | Sander et al. (2011)                                  |
| G2105 | UpStTrG  | $\text{OH} + \text{H}_2 \rightarrow \text{H}_2\text{O} + \text{H}$                | $2.8\text{E}-12*\text{EXP}(-1800./\text{temp})$                                                                 | Sander et al. (2011)                                  |
| G2107 | UpStTrG  | $\text{HO}_2 + \text{O}_3 \rightarrow \text{OH} + 2 \text{O}_2$                   | $1.\text{E}-14*\text{EXP}(-490./\text{temp})$                                                                   | Sander et al. (2011)                                  |
| G2109 | UpStTrG  | $\text{HO}_2 + \text{OH} \rightarrow \text{H}_2\text{O} + \text{O}_2$             | $4.8\text{E}-11*\text{EXP}(250./\text{temp})$                                                                   | Sander et al. (2011)                                  |
| G2110 | UpStTrG  | $\text{HO}_2 + \text{HO}_2 \rightarrow \text{H}_2\text{O}_2 + \text{O}_2$         | $\text{k\_H02\_H02}$                                                                                            | Christensen et al. (2002), Kircher and Sander (1984)* |
| G2111 | UpStTrG  | $\text{H}_2\text{O} + \text{O}(^1\text{D}) \rightarrow 2 \text{OH}$               | $1.63\text{E}-10*\text{EXP}(60./\text{temp})$                                                                   | Sander et al. (2011)                                  |
| G2112 | UpStTrG  | $\text{H}_2\text{O}_2 + \text{OH} \rightarrow \text{H}_2\text{O} + \text{HO}_2$   | $1.8\text{E}-12$                                                                                                | Sander et al. (2011)                                  |
| G2117 | UpStTrG  | $\text{H}_2\text{O} + \text{H}_2\text{O} \rightarrow (\text{H}_2\text{O})_2$      | $6.521\text{E}-26*\text{temp}*\text{EXP}(1851.09/\text{temp})$<br>$*\text{EXP}(-5.10485\text{E}-3*\text{temp})$ | Scribano et al. (2006)*                               |
| G2118 | UpStTrG  | $(\text{H}_2\text{O})_2 \rightarrow \text{H}_2\text{O} + \text{H}_2\text{O}$      | $1.\text{E}0$                                                                                                   | see note*                                             |
| G3101 | UpStTrGN | $\text{N}_2 + \text{O}(^1\text{D}) \rightarrow \text{O}(^3\text{P}) + \text{N}_2$ | $2.15\text{E}-11*\text{EXP}(110./\text{temp})$                                                                  | Sander et al. (2011)                                  |
| G3103 | UpStTrGN | $\text{NO} + \text{O}_3 \rightarrow \text{NO}_2 + \text{O}_2$                     | $3.\text{E}-12*\text{EXP}(-1500./\text{temp})$                                                                  | Sander et al. (2011)                                  |
| G3106 | StTrGN   | $\text{NO}_2 + \text{O}_3 \rightarrow \text{NO}_3 + \text{O}_2$                   | $1.2\text{E}-13*\text{EXP}(-2450./\text{temp})$                                                                 | Sander et al. (2011)                                  |
| G3108 | StTrGN   | $\text{NO}_3 + \text{NO} \rightarrow 2 \text{NO}_2$                               | $1.5\text{E}-11*\text{EXP}(170./\text{temp})$                                                                   | Sander et al. (2011)                                  |
| G3109 | UpStTrGN | $\text{NO}_3 + \text{NO}_2 \rightarrow \text{N}_2\text{O}_5$                      | $\text{k\_N03\_N02}$                                                                                            | Sander et al. (2011)*                                 |
| G3110 | StTrGN   | $\text{N}_2\text{O}_5 \rightarrow \text{NO}_2 + \text{NO}_3$                      | $\text{k\_N03\_N02}/(2.7\text{E}-27*\text{EXP}(11000./\text{temp}))$                                            | Sander et al. (2011)*                                 |
| G3200 | TrGN     | $\text{NO} + \text{OH} \rightarrow \text{HONO}$                                   | $\text{k\_3rd}(\text{temp}, \text{cair}, 7.0\text{E}-31, 2.6, 3.6\text{E}-11, 0.1, 0.6)$                        | Sander et al. (2011)                                  |
| G3201 | UpStTrGN | $\text{NO} + \text{HO}_2 \rightarrow \text{NO}_2 + \text{OH}$                     | $3.3\text{E}-12*\text{EXP}(270./\text{temp})$                                                                   | Sander et al. (2011)                                  |
| G3202 | UpStTrGN | $\text{NO}_2 + \text{OH} \rightarrow \text{HNO}_3$                                | $\text{k\_3rd}(\text{temp}, \text{cair}, 1.8\text{E}-30, 3.0, 2.8\text{E}-11, 0., 0.6)$                         | Sander et al. (2011)                                  |
| G3203 | StTrGN   | $\text{NO}_2 + \text{HO}_2 \rightarrow \text{HNO}_4$                              | $\text{k\_N02\_H02}$                                                                                            | Sander et al. (2011)*                                 |
| G3204 | TrGN     | $\text{NO}_3 + \text{HO}_2 \rightarrow \text{NO}_2 + \text{OH} + \text{O}_2$      | $3.5\text{E}-12$                                                                                                | Sander et al. (2011)                                  |
| G3205 | TrGN     | $\text{HONO} + \text{OH} \rightarrow \text{NO}_2 + \text{H}_2\text{O}$            | $1.8\text{E}-11*\text{EXP}(-390./\text{temp})$                                                                  | Sander et al. (2011)                                  |
| G3206 | StTrGN   | $\text{HNO}_3 + \text{OH} \rightarrow \text{H}_2\text{O} + \text{NO}_3$           | $\text{k\_HNO3\_OH}$                                                                                            | Sander et al. (2011)*                                 |
| G3207 | StTrGN   | $\text{HNO}_4 \rightarrow \text{NO}_2 + \text{HO}_2$                              | $\text{k\_N02\_H02}/(2.1\text{E}-27*\text{EXP}(10900./\text{temp}))$                                            | Sander et al. (2011)*                                 |
| G3208 | StTrGN   | $\text{HNO}_4 + \text{OH} \rightarrow \text{NO}_2 + \text{H}_2\text{O}$           | $1.3\text{E}-12*\text{EXP}(380./\text{temp})$                                                                   | Sander et al. (2011)                                  |

Table 1: Gas phase reactions (... continued)

| #      | labels | reaction                                                                                                                           | rate coefficient                                                                                             | reference                                                                      |
|--------|--------|------------------------------------------------------------------------------------------------------------------------------------|--------------------------------------------------------------------------------------------------------------|--------------------------------------------------------------------------------|
| G3209  | TrGN   | $\text{NH}_3 + \text{OH} \rightarrow \text{NH}_2 + \text{H}_2\text{O}$                                                             | $1.7\text{E-}12 \cdot \text{EXP}(-710./\text{temp})$                                                         | Kohlmann and Poppe (1999)                                                      |
| G3210  | TrGN   | $\text{NH}_2 + \text{O}_3 \rightarrow \text{NH}_2\text{O} + \text{O}_2$                                                            | $4.3\text{E-}12 \cdot \text{EXP}(-930./\text{temp})$                                                         | Kohlmann and Poppe (1999)                                                      |
| G3211  | TrGN   | $\text{NH}_2 + \text{HO}_2 \rightarrow \text{NH}_2\text{O} + \text{OH}$                                                            | $4.8\text{E-}07 \cdot \text{EXP}(-628./\text{temp})$<br>$\cdot \text{temp}^{**}(-1.32)$                      | Kohlmann and Poppe (1999)                                                      |
| G3212  | TrGN   | $\text{NH}_2 + \text{HO}_2 \rightarrow \text{HNO} + \text{H}_2\text{O}$                                                            | $9.4\text{E-}09 \cdot \text{EXP}(-356./\text{temp})$<br>$\cdot \text{temp}^{**}(-1.12)$                      | Kohlmann and Poppe (1999)                                                      |
| G3213  | TrGN   | $\text{NH}_2 + \text{NO} \rightarrow \text{HO}_2 + \text{OH} + \text{N}_2$                                                         | $1.92\text{E-}12 \cdot ((\text{temp}/298.)^{**}(-1.5))$                                                      | Kohlmann and Poppe (1999)                                                      |
| G3214  | TrGN   | $\text{NH}_2 + \text{NO} \rightarrow \text{N}_2 + \text{H}_2\text{O}$                                                              | $1.41\text{E-}11 \cdot ((\text{temp}/298.)^{**}(-1.5))$                                                      | Kohlmann and Poppe (1999)                                                      |
| G3215  | TrGN   | $\text{NH}_2 + \text{NO}_2 \rightarrow \text{N}_2\text{O} + \text{H}_2\text{O}$                                                    | $1.2\text{E-}11 \cdot ((\text{temp}/298.)^{**}(-2.0))$                                                       | Kohlmann and Poppe (1999)                                                      |
| G3216  | TrGN   | $\text{NH}_2 + \text{NO}_2 \rightarrow \text{NH}_2\text{O} + \text{NO}$                                                            | $0.8\text{E-}11 \cdot ((\text{temp}/298.)^{**}(-2.0))$                                                       | Kohlmann and Poppe (1999)                                                      |
| G3217  | TrGN   | $\text{NH}_2\text{O} + \text{O}_3 \rightarrow \text{NH}_2 + \text{O}_2$                                                            | $1.2\text{E-}14$                                                                                             | Kohlmann and Poppe (1999)                                                      |
| G3218  | TrGN   | $\text{NH}_2\text{O} \rightarrow \text{NHOH}$                                                                                      | $1.3\text{E}3$                                                                                               | Kohlmann and Poppe (1999)                                                      |
| G3219  | TrGN   | $\text{HNO} + \text{OH} \rightarrow \text{NO} + \text{H}_2\text{O}$                                                                | $8.0\text{E-}11 \cdot \text{EXP}(-500./\text{temp})$                                                         | Kohlmann and Poppe (1999)                                                      |
| G3220  | TrGN   | $\text{HNO} + \text{NHOH} \rightarrow \text{NH}_2\text{OH} + \text{NO}$                                                            | $1.66\text{E-}12 \cdot \text{EXP}(-1500./\text{temp})$                                                       | Kohlmann and Poppe (1999)                                                      |
| G3221  | TrGN   | $\text{HNO} + \text{NO}_2 \rightarrow \text{HONO} + \text{NO}$                                                                     | $1.0\text{E-}12 \cdot \text{EXP}(-1000./\text{temp})$                                                        | Kohlmann and Poppe (1999)                                                      |
| G3222  | TrGN   | $\text{NHOH} + \text{OH} \rightarrow \text{HNO} + \text{H}_2\text{O}$                                                              | $1.66\text{E-}12$                                                                                            | Kohlmann and Poppe (1999)                                                      |
| G3223  | TrGN   | $\text{NH}_2\text{OH} + \text{OH} \rightarrow \text{NHOH} + \text{H}_2\text{O}$                                                    | $4.13\text{E-}11 \cdot \text{EXP}(-2138./\text{temp})$                                                       | Kohlmann and Poppe (1999)                                                      |
| G3224  | TrGN   | $\text{HNO} + \text{O}_2 \rightarrow \text{HO}_2 + \text{NO}$                                                                      | $3.65\text{E-}14 \cdot \text{EXP}(-4600./\text{temp})$                                                       | Kohlmann and Poppe (1999)                                                      |
| G4101  | StTrG  | $\text{CH}_4 + \text{OH} \rightarrow \text{CH}_3 + \text{H}_2\text{O}$                                                             | $1.85\text{E-}20 \cdot \text{EXP}(2.82 \cdot \text{LOG}(\text{temp})$<br>$-987./\text{temp})$                | Atkinson (2003)                                                                |
| G4102  | TrG    | $\text{CH}_3\text{OH} + \text{OH} \rightarrow .85 \text{ HCHO} + .85 \text{ HO}_2 + .15 \text{ CH}_3\text{O} + \text{H}_2\text{O}$ | $6.38\text{E-}18 \cdot \text{temp}^{**}2 \cdot \text{EXP}(144./\text{temp})$                                 | Atkinson et al. (2006)                                                         |
| G4103a | StTrG  | $\text{CH}_3\text{O}_2 + \text{HO}_2 \rightarrow \text{CH}_3\text{OOH} + \text{O}_2$                                               | $3.8\text{E-}13 \cdot \text{EXP}(780./\text{temp}) / (1.+1./$<br>$498. \cdot \text{EXP}(1160./\text{temp}))$ | Atkinson et al. (2006)                                                         |
| G4103b | StTrG  | $\text{CH}_3\text{O}_2 + \text{HO}_2 \rightarrow \text{HCHO} + \text{H}_2\text{O} + \text{O}_2$                                    | $3.8\text{E-}13 \cdot \text{EXP}(780./\text{temp}) / (1.+$<br>$498. \cdot \text{EXP}(-1160./\text{temp}))$   | Atkinson et al. (2006)                                                         |
| G4104a | StTrGN | $\text{CH}_3\text{O}_2 + \text{NO} \rightarrow \text{CH}_3\text{O} + \text{NO}_2$                                                  | $2.3\text{E-}12 \cdot \text{EXP}(360./\text{temp}) \cdot (1.-\text{beta}_$<br>$\text{CH3NO3})$               | Atkinson et al. (2006),<br>Butkovskaya et al. (2012),<br>Flocke et al. (1998)  |
| G4104b | StTrGN | $\text{CH}_3\text{O}_2 + \text{NO} \rightarrow \text{CH}_3\text{ONO}_2$                                                            | $2.3\text{E-}12 \cdot \text{EXP}(360./\text{temp}) \cdot \text{beta}_$<br>$\text{CH3NO3}$                    | Atkinson et al. (2006),<br>Butkovskaya et al. (2012),<br>Flocke et al. (1998)* |
| G4105  | TrGN   | $\text{CH}_3\text{O}_2 + \text{NO}_3 \rightarrow \text{CH}_3\text{O} + \text{NO}_2 + \text{O}_2$                                   | $1.2\text{E-}12$                                                                                             | Atkinson et al. (2006)                                                         |
| G4106a | StTrG  | $\text{CH}_3\text{O}_2 \rightarrow \text{CH}_3\text{O} + .5 \text{ O}_2$                                                           | $7.4\text{E-}13 \cdot \text{EXP}(-520./\text{temp}) \cdot \text{R02} \cdot 2.$                               | Atkinson et al. (2006)                                                         |

Table 1: Gas phase reactions (... continued)

| #      | labels  | reaction                                                                                                                                                                      | rate coefficient                                                                                                                                             | reference                 |
|--------|---------|-------------------------------------------------------------------------------------------------------------------------------------------------------------------------------|--------------------------------------------------------------------------------------------------------------------------------------------------------------|---------------------------|
| G4106b | StTrG   | $\text{CH}_3\text{O}_2 \rightarrow .5 \text{HCHO} + .5 \text{CH}_3\text{OH} + .5 \text{O}_2$                                                                                  | $(\text{k\_CH302}-7.4\text{E}-13*\text{EXP}(-520./\text{temp}))$<br>$*\text{R02}*2.$                                                                         | Atkinson et al. (2006)    |
| G4107  | StTrG   | $\text{CH}_3\text{OOH} + \text{OH} \rightarrow .6 \text{CH}_3\text{O}_2 + .4 \text{HCHO} + .4 \text{OH} + \text{H}_2\text{O}$                                                 | $\text{k\_CH300H\_OH}$                                                                                                                                       | Wallington et al.         |
| G4108  | StTrG   | $\text{HCHO} + \text{OH} \rightarrow \text{CO} + \text{H}_2\text{O} + \text{HO}_2$                                                                                            | $9.52\text{E}-18*\text{EXP}(2.03*\text{LOG}(\text{temp})$<br>$+636./\text{temp})$                                                                            | Sivakumaran et al. (2003) |
| G4109  | TrGN    | $\text{HCHO} + \text{NO}_3 \rightarrow \text{HNO}_3 + \text{CO} + \text{HO}_2$                                                                                                | $3.4\text{E}-13*\text{EXP}(-1900./\text{temp})$                                                                                                              | Sander et al. (2011)      |
| G4110  | UpStTrG | $\text{CO} + \text{OH} \rightarrow \text{H} + \text{CO}_2$                                                                                                                    | $(1.57\text{E}-13+\text{cair}*3.54\text{E}-33)$                                                                                                              | McCabe et al. (2001)      |
| G4111  | TrG     | $\text{HCOOH} + \text{OH} \rightarrow \text{CO}_2 + \text{HO}_2 + \text{H}_2\text{O}$                                                                                         | $2.94\text{E}-14*\text{exp}(786./\text{temp})$<br>$+9.85\text{E}-13*\text{EXP}(-1036./\text{temp})$                                                          | Paulot et al. (2011)      |
| G4114  | StTrGN  | $\text{CH}_3\text{O}_2 + \text{NO}_2 \rightarrow \text{CH}_3\text{O}_2\text{NO}_2$                                                                                            | $\text{k\_NO2\_CH302}$                                                                                                                                       | Sander et al. (2011)      |
| G4115  | StTrGN  | $\text{CH}_3\text{O}_2\text{NO}_2 \rightarrow \text{CH}_3\text{O}_2 + \text{NO}_2$                                                                                            | $\text{k\_NO2\_CH302}/(9.5\text{E}-29*\text{EXP}(11234./$<br>$\text{temp}))$                                                                                 | Sander et al. (2011)      |
| G4116  | StTrGN  | $\text{CH}_3\text{O}_2\text{NO}_2 + \text{OH} \rightarrow \text{HCHO} + \text{NO}_3 + \text{H}_2\text{O}$                                                                     | $3.00\text{E}-14$                                                                                                                                            | see note*                 |
| G4117  | StTrGN  | $\text{CH}_3\text{ONO}_2 + \text{OH} \rightarrow \text{H}_2\text{O} + \text{HCHO} + \text{NO}_2$                                                                              | $4.0\text{E}-13*\text{EXP}(-845./\text{temp})$                                                                                                               | Atkinson et al. (2006)    |
| G4118  | StTrG   | $\text{CH}_3\text{O} \rightarrow \text{HO}_2 + \text{HCHO}$                                                                                                                   | $1.3\text{E}-14*\text{exp}(-663./\text{temp})*\text{c}(\text{ind\_O2})$                                                                                      | Chai et al. (2014)        |
| G4119a | StTrGN  | $\text{CH}_3\text{O} + \text{NO}_2 \rightarrow \text{CH}_3\text{ONO}_2$                                                                                                       | $\text{k\_3rd\_iupac}(\text{temp}, \text{cair}, 8.1\text{E}-29,$<br>$4.5, 2.1\text{E}-11, 0., 0.44)$                                                         | Atkinson et al. (2006)    |
| G4119b | StTrGN  | $\text{CH}_3\text{O} + \text{NO}_2 \rightarrow \text{HCHO} + \text{HONO}$                                                                                                     | $9.6\text{E}-12*\text{EXP}(-1150./\text{temp})$                                                                                                              | Atkinson et al. (2006)    |
| G4120a | StTrGN  | $\text{CH}_3\text{O} + \text{NO} \rightarrow \text{CH}_3\text{ONO}$                                                                                                           | $\text{k\_3rd\_iupac}(\text{temp}, \text{cair}, 2.6\text{E}-29,$<br>$2.8, 3.3\text{E}-11, 0.6, \text{REAL}(\text{EXP}(-\text{temp}/$<br>$900.), \text{SP}))$ | Atkinson et al. (2006)    |
| G4120b | StTrGN  | $\text{CH}_3\text{O} + \text{NO} \rightarrow \text{HCHO} + \text{HNO}$                                                                                                        | $2.3\text{E}-12*(\text{temp}/300.)*0.7$                                                                                                                      | Atkinson et al. (2006)    |
| G4121  | StTrG   | $\text{CH}_3\text{O}_2 + \text{O}_3 \rightarrow \text{CH}_3\text{O} + 2 \text{O}_2$                                                                                           | $2.9\text{E}-16*\text{exp}(-1000./\text{temp})$                                                                                                              | Sander et al. (2011)      |
| G4122  | StTrGN  | $\text{CH}_3\text{ONO} + \text{OH} \rightarrow \text{H}_2\text{O} + \text{HCHO} + \text{NO}$                                                                                  | $1.\text{E}-10*\text{exp}(-1764./\text{temp})$                                                                                                               | Nielsen et al. (1991)     |
| G4123  | StTrG   | $\text{HCHO} + \text{HO}_2 \rightarrow \text{HOCH}_2\text{O}_2$                                                                                                               | $9.7\text{E}-15*\text{EXP}(625./\text{temp})$                                                                                                                | Atkinson et al. (2006)    |
| G4124  | StTrG   | $\text{HOCH}_2\text{O}_2 \rightarrow \text{HCHO} + \text{HO}_2$                                                                                                               | $2.4\text{E}12*\text{EXP}(-7000./\text{temp})$                                                                                                               | Atkinson et al. (2006)    |
| G4125  | StTrG   | $\text{HOCH}_2\text{O}_2 + \text{HO}_2 \rightarrow .5 \text{HOCH}_2\text{OOH} + .5 \text{HCOOH} + .2$<br>$\text{OH} + .2 \text{HO}_2 + .3 \text{H}_2\text{O} + .8 \text{O}_2$ | $5.6\text{E}-15*\text{EXP}(2300./\text{temp})$                                                                                                               | Atkinson et al. (2006)    |
| G4126  | StTrGN  | $\text{HOCH}_2\text{O}_2 + \text{NO} \rightarrow \text{NO}_2 + \text{HO}_2 + \text{HCOOH}$                                                                                    | $0.7275*2.3\text{E}-12*\text{EXP}(360./\text{temp})$                                                                                                         | Atkinson et al. (2006)*   |
| G4127  | StTrGN  | $\text{HOCH}_2\text{O}_2 + \text{NO}_3 \rightarrow \text{NO}_2 + \text{HO}_2 + \text{HCOOH}$                                                                                  | $1.2\text{E}-12$                                                                                                                                             | see note*                 |
| G4129a | StTrG   | $\text{HOCH}_2\text{O}_2 \rightarrow \text{HCOOH} + \text{HO}_2$                                                                                                              | $(\text{k\_CH302}*5.5\text{E}-12)**0.5*\text{R02}*2.$                                                                                                        | Atkinson et al. (2006)    |
| G4129b | StTrG   | $\text{HOCH}_2\text{O}_2 \rightarrow .5 \text{HCOOH} + .5 \text{HOCH}_2\text{OH} + .5 \text{O}_2$                                                                             | $(\text{k\_CH302}*5.7\text{E}-14*\text{EXP}(750./\text{temp}))$<br>$**0.5*\text{R02}*2.$                                                                     | Atkinson et al. (2006)    |
| G4130a | StTrG   | $\text{HOCH}_2\text{OOH} + \text{OH} \rightarrow \text{HOCH}_2\text{O}_2 + \text{H}_2\text{O}$                                                                                | $0.6*\text{k\_CH300H\_OH}$                                                                                                                                   | Taraborrelli (2010)*      |
| G4130b | StTrG   | $\text{HOCH}_2\text{OOH} + \text{OH} \rightarrow \text{HCOOH} + \text{H}_2\text{O} + \text{OH}$                                                                               | $\text{k\_rohro} + \text{k\_s*f\_sooh}*f\_soh$                                                                                                               | Taraborrelli (2010)*      |

Table 1: Gas phase reactions (... continued)

| #     | labels | reaction                                                                                                                                                 | rate coefficient                                                                                  | reference                                       |
|-------|--------|----------------------------------------------------------------------------------------------------------------------------------------------------------|---------------------------------------------------------------------------------------------------|-------------------------------------------------|
| G4132 | StTrG  | $\text{HOCH}_2\text{OH} + \text{OH} \rightarrow \text{HO}_2 + \text{HCOOH} + \text{H}_2\text{O}$                                                         | $k_{\text{rohro}} + 2 \cdot k_{\text{s}} \cdot f_{\text{soh}} \cdot f_{\text{soh}}$               | Taraborrelli (2010)*                            |
| G4133 | StTrG  | $\text{CH}_3\text{O}_2 + \text{OH} \rightarrow \text{CH}_3\text{O} + \text{HO}_2$                                                                        | 1.4E-10                                                                                           | Bossolasco et al. (2014)*                       |
| G4134 | StTrG  | $\text{CH}_2\text{OO} \rightarrow \text{CO} + \text{HO}_2 + \text{OH}$                                                                                   | $1.124\text{E}+14 \cdot \text{EXP}(-10000/\text{temp})$                                           | see note*                                       |
| G4135 | StTrG  | $\text{CH}_2\text{OO} + \text{H}_2\text{O} \rightarrow \text{HOCH}_2\text{OOH}$                                                                          | $k_{\text{CH200\_N02}} \cdot 3.6\text{E}-6$                                                       | Ouyang et al. (2013)*                           |
| G4136 | StTrG  | $\text{CH}_2\text{OO} + (\text{H}_2\text{O})_2 \rightarrow \text{HOCH}_2\text{OOH} + \text{H}_2\text{O}$                                                 | 5.2E-12                                                                                           | Chao et al. (2015), Lewis et al. (2015)*        |
| G4137 | StTrGN | $\text{CH}_2\text{OO} + \text{NO} \rightarrow \text{HCHO} + \text{NO}_2$                                                                                 | 6.E-14                                                                                            | Welz et al. (2012)*                             |
| G4138 | StTrGN | $\text{CH}_2\text{OO} + \text{NO}_2 \rightarrow \text{HCHO} + \text{NO}_3$                                                                               | $k_{\text{CH200\_N02}}$                                                                           | Welz et al. (2012), Stone et al. (2014)*        |
| G4140 | StTrG  | $\text{CH}_2\text{OO} + \text{CO} \rightarrow \text{HCHO} + \text{CO}_2$                                                                                 | 3.6E-14                                                                                           | Vereecken et al. (2012)                         |
| G4141 | StTrG  | $\text{CH}_2\text{OO} + \text{HCOOH} \rightarrow 2 \text{HCOOH}$                                                                                         | 1.E-10                                                                                            | Welz et al. (2014)*                             |
| G4142 | StTrG  | $\text{CH}_2\text{OO} + \text{HCHO} \rightarrow 2 \text{LCARBON}$                                                                                        | 1.7E-12                                                                                           | Stone et al. (2014)*                            |
| G4143 | StTrG  | $\text{CH}_2\text{OO} + \text{CH}_3\text{OH} \rightarrow 2 \text{LCARBON}$                                                                               | 5.E-12                                                                                            | Vereecken et al. (2012)*                        |
| G4144 | StTrG  | $\text{CH}_2\text{OO} + \text{CH}_3\text{O}_2 \rightarrow 2 \text{LCARBON}$                                                                              | 5.E-12                                                                                            | Vereecken et al. (2012)*                        |
| G4145 | StTrG  | $\text{CH}_2\text{OO} + \text{HO}_2 \rightarrow \text{LCARBON}$                                                                                          | 5.E-12                                                                                            | Vereecken et al. (2012)                         |
| G4146 | StTrG  | $\text{CH}_2\text{OO} + \text{O}_3 \rightarrow \text{HCHO} + 2 \text{O}_2$                                                                               | 1.E-12                                                                                            | Vereecken et al. (2014)                         |
| G4147 | StTrG  | $\text{CH}_2\text{OO} + \text{CH}_2\text{OO} \rightarrow 2 \text{HCHO} + \text{O}_2$                                                                     | 6.E-11                                                                                            | Buras et al. (2014)                             |
| G4148 | StTrGN | $\text{HOCH}_2\text{O}_2 + \text{NO}_2 \rightarrow \text{HOCH}_2\text{O}_2\text{NO}_2$                                                                   | $k_{\text{N02\_CH302}}$                                                                           | Sander et al. (2011)                            |
| G4149 | StTrGN | $\text{HOCH}_2\text{O}_2\text{NO}_2 \rightarrow \text{HOCH}_2\text{O}_2 + \text{NO}_2$                                                                   | $k_{\text{N02\_CH302}} / (9.5\text{E}-29 \cdot \text{EXP}(11234./\text{temp}))$                   | Sander et al. (2011), Barnes et al. (1985)*     |
| G4150 | StTrGN | $\text{HOCH}_2\text{O}_2\text{NO}_2 + \text{OH} \rightarrow \text{HCOOH} + \text{NO}_3 + \text{H}_2\text{O}$                                             | $9.50\text{E}-13 \cdot \text{EXP}(-650./\text{temp}) \cdot f_{\text{soh}}$                        | see note*                                       |
| G4151 | StTrG  | $\text{CH}_3 + \text{O}_2 \rightarrow \text{CH}_3\text{O}_2$                                                                                             | $k_{\text{3rd\_iupac}}(\text{temp}, \text{cair}, 7.0\text{E}-31, 3., 1.8\text{E}-12, -1.1, 0.33)$ | Atkinson et al. (2006)                          |
| G4152 | StTrG  | $\text{CH}_3 + \text{O}_3 \rightarrow .956 \text{HCHO} + .956 \text{H} + .044 \text{CH}_3\text{O} + \text{O}_2$                                          | $5.1\text{E}-12 \cdot \exp(-210./\text{temp})$                                                    | Albaladejo et al. (2002), Ogryzlo et al. (1981) |
| G4153 | StTrG  | $\text{CH}_3 + \text{O}(^3\text{P}) \rightarrow .83 \text{HCHO} + .83 \text{H} + .17 \text{CO} + .17 \text{H}_2 + .17 \text{H}$                          | 1.3E-10                                                                                           | Atkinson et al. (2006)                          |
| G4154 | StTrG  | $\text{CH}_3\text{O} + \text{O}_3 \rightarrow \text{CH}_3\text{O}_2 + \text{O}_2$                                                                        | 2.53E-14                                                                                          | Albaladejo et al. (2002)*                       |
| G4155 | StTrG  | $\text{CH}_3\text{O} + \text{O}(^3\text{P}) \rightarrow .75 \text{CH}_3 + .75 \text{O}_2 + .25 \text{HCHO} + .25 \text{OH}$                              | 2.5E-11                                                                                           | Baulch et al. (2005)                            |
| G4156 | StTrG  | $\text{CH}_3\text{O}_2 + \text{O}(^3\text{P}) \rightarrow \text{CH}_3\text{O} + \text{O}_2$                                                              | 4.3E-11                                                                                           | Zellner et al. (1988)                           |
| G4157 | StTrG  | $\text{HCHO} + \text{O}(^3\text{P}) \rightarrow .7 \text{OH} + .7 \text{CO} + .3 \text{H} + .3 \text{CO}_2 + \text{HO}_2$                                | $3.\text{E}-11 \cdot \text{EXP}(-1600./\text{temp})$                                              | Sander et al. (2011)                            |
| G4158 | TrG    | $\text{CH}_2\text{OO}^* \rightarrow .37 \text{CH}_2\text{OO} + .47 \text{CO} + .47 \text{H}_2\text{O} + .16 \text{HO}_2 + .16 \text{CO} + .16 \text{OH}$ | KDEC                                                                                              | Atkinson et al. (2006)                          |

Table 1: Gas phase reactions (... continued)

| #       | labels | reaction                                                                                                                  | rate coefficient                                                                                                                                     | reference                                         |
|---------|--------|---------------------------------------------------------------------------------------------------------------------------|------------------------------------------------------------------------------------------------------------------------------------------------------|---------------------------------------------------|
| G4159   | TrGN   | $\text{HCN} + \text{OH} \rightarrow \text{H}_2\text{O} + \text{CN}$                                                       | $k_{\text{3rd}}(\text{temp}, \text{cair}, 4.28\text{E-}33, 1.0, \text{REAL}(4.25\text{E-}13 * \text{EXP}(-1150./\text{temp}), \text{SP}), 1.0, 0.8)$ | Kleinböhle et al. (2006)                          |
| G4160a  | TrGN   | $\text{HCN} + \text{O}(^1\text{D}) \rightarrow \text{O}(^3\text{P}) + \text{HCN}$                                         | $1.08\text{E-}10 * \text{EXP}(105./\text{temp}) * 0.15 * \text{EXP}(200/\text{temp})$                                                                | Strekowski et al. (2010)                          |
| G4160b  | TrGN   | $\text{HCN} + \text{O}(^1\text{D}) \rightarrow \text{H} + \text{NCO}$                                                     | $1.08\text{E-}10 * \text{EXP}(105./\text{temp}) * 0.68/2.$                                                                                           | Strekowski et al. (2010)*                         |
| G4160c  | TrGN   | $\text{HCN} + \text{O}(^1\text{D}) \rightarrow \text{OH} + \text{CN}$                                                     | $1.08\text{E-}10 * \text{EXP}(105./\text{temp}) * (1. - (0.68/2. + 0.15 * \text{EXP}(200/\text{temp})))$                                             | Strekowski et al. (2010)*                         |
| G4161   | TrGN   | $\text{HCN} + \text{O}(^3\text{P}) \rightarrow \text{H} + \text{NCO}$                                                     | $1.0\text{E-}11 * \text{EXP}(-4000./\text{temp})$                                                                                                    | Sander et al. (2011)*                             |
| G4162   | TrGN   | $\text{CN} + \text{O}_2 \rightarrow \text{NCO} + \text{O}(^3\text{P})$                                                    | $1.2\text{E-}11 * \text{EXP}(210./\text{temp}) * 0.75$                                                                                               | Baulch et al. (2005)                              |
| G4163   | TrGN   | $\text{CN} + \text{O}_2 \rightarrow \text{CO} + \text{NO}$                                                                | $1.2\text{E-}11 * \text{EXP}(210./\text{temp}) * 0.25$                                                                                               | Baulch et al. (2005)                              |
| G4164   | TrGN   | $\text{NCO} + \text{O}_2 \rightarrow \text{CO}_2 + \text{NO}$                                                             | $7.\text{E-}15$                                                                                                                                      | Becker et al. (2000)*                             |
| G42000  | TrGC   | $\text{C}_2\text{H}_6 + \text{OH} \rightarrow \text{C}_2\text{H}_5\text{O}_2 + \text{H}_2\text{O}$                        | $1.49\text{E-}17 * \text{temp} * \text{temp} * \text{EXP}(-499./\text{temp})$                                                                        | Atkinson et al. (2006)                            |
| G42001  | TrGC   | $\text{C}_2\text{H}_4 + \text{O}_3 \rightarrow \text{HCHO} + \text{CH}_2\text{OO}^*$                                      | $9.1\text{E-}15 * \text{EXP}(-2580./\text{temp})$                                                                                                    | Atkinson et al. (2006)*                           |
| G42002  | TrGC   | $\text{C}_2\text{H}_4 + \text{OH} \rightarrow \text{HOCH}_2\text{CH}_2\text{O}_2$                                         | $k_{\text{3rd\_iupac}}(\text{temp}, \text{cair}, 8.6\text{E-}29, 3.1, 9.\text{E-}12, 0.85, 0.48)$                                                    | Atkinson et al. (2006), Rickard and Pascoe (2009) |
| G42003  | TrGC   | $\text{C}_2\text{H}_5\text{O}_2 + \text{HO}_2 \rightarrow \text{C}_2\text{H}_5\text{OOH}$                                 | $7.5\text{E-}13 * \text{EXP}(700./\text{temp})$                                                                                                      | Sander et al. (2011)                              |
| G42004a | TrGCN  | $\text{C}_2\text{H}_5\text{O}_2 + \text{NO} \rightarrow \text{CH}_3\text{CHO} + \text{HO}_2 + \text{NO}_2$                | $2.55\text{E-}12 * \text{EXP}(380./\text{temp}) * (1. - \text{beta\_C2H5NO3})$                                                                       | Atkinson et al. (2006), Butkovskaya et al. (2010) |
| G42004b | TrGCN  | $\text{C}_2\text{H}_5\text{O}_2 + \text{NO} \rightarrow \text{C}_2\text{H}_5\text{ONO}_2$                                 | $2.55\text{E-}12 * \text{EXP}(380./\text{temp}) * \text{beta\_C2H5NO3}$                                                                              | Atkinson et al. (2006), Butkovskaya et al. (2010) |
| G42005  | TrGCN  | $\text{C}_2\text{H}_5\text{O}_2 + \text{NO}_3 \rightarrow \text{CH}_3\text{CHO} + \text{HO}_2 + \text{NO}_2$              | $2.3\text{E-}12$                                                                                                                                     | Wallington et al.                                 |
| G42006  | TrGC   | $\text{C}_2\text{H}_5\text{O}_2 \rightarrow .8 \text{CH}_3\text{CHO} + .6 \text{HO}_2 + .2 \text{C}_2\text{H}_5\text{OH}$ | $2. * (7.6\text{E-}14 * k_{\text{CH3O2}}) * (.5) * \text{R02}$                                                                                       | Taraborrelli (2016), Atkinson et al. (2006)       |
| G42007a | TrGC   | $\text{C}_2\text{H}_5\text{OOH} + \text{OH} \rightarrow \text{C}_2\text{H}_5\text{O}_2 + \text{H}_2\text{O}$              | $0.6 * k_{\text{CH3OOH\_OH}}$                                                                                                                        | Taraborrelli (2016)                               |
| G42007b | TrGC   | $\text{C}_2\text{H}_5\text{OOH} + \text{OH} \rightarrow \text{CH}_3\text{CHO} + \text{OH}$                                | $k_{\text{s*f\_sooh}}$                                                                                                                               | Taraborrelli (2016)                               |
| G42008a | TrGC   | $\text{CH}_3\text{CHO} + \text{OH} \rightarrow \text{CH}_3\text{C}(\text{O}) + \text{H}_2\text{O}$                        | $4.4\text{E-}12 * \text{EXP}(365./\text{temp}) * 0.95$                                                                                               | Atkinson et al. (2006)                            |
| G42008b | TrGC   | $\text{CH}_3\text{CHO} + \text{OH} \rightarrow \text{HCOCH}_2\text{O}_2 + \text{H}_2\text{O}$                             | $4.4\text{E-}12 * \text{EXP}(365./\text{temp}) * 0.05$                                                                                               | Atkinson et al. (2006)                            |
| G42009  | TrGCN  | $\text{CH}_3\text{CHO} + \text{NO}_3 \rightarrow \text{CH}_3\text{C}(\text{O}) + \text{HNO}_3$                            | KN03AL                                                                                                                                               | Rickard and Pascoe (2009)                         |
| G42010  | TrGC   | $\text{CH}_3\text{COOH} + \text{OH} \rightarrow \text{CH}_3 + \text{CO}_2 + \text{H}_2\text{O}$                           | $4.0\text{E-}14 * \text{EXP}(850./\text{temp})$                                                                                                      | Atkinson et al. (2006)*                           |
| G42011a | TrGC   | $\text{CH}_3\text{C}(\text{O})\text{OO} + \text{HO}_2 \rightarrow \text{OH} + \text{CH}_3 + \text{CO}_2$                  | $5.20\text{E-}13 * \text{EXP}(980./\text{temp}) * 1.507 * 0.61$                                                                                      | Groß et al. (2014)                                |
| G42011b | TrGC   | $\text{CH}_3\text{C}(\text{O})\text{OO} + \text{HO}_2 \rightarrow \text{CH}_3\text{C}(\text{O})\text{OOH}$                | $5.20\text{E-}13 * \text{EXP}(980./\text{temp}) * 1.507 * 0.23$                                                                                      | Groß et al. (2014)                                |
| G42011c | TrGC   | $\text{CH}_3\text{C}(\text{O})\text{OO} + \text{HO}_2 \rightarrow \text{CH}_3\text{COOH} + \text{O}_3$                    | $5.20\text{E-}13 * \text{EXP}(980./\text{temp}) * 1.507 * 0.16$                                                                                      | Groß et al. (2014)                                |
| G42012  | TrGCN  | $\text{CH}_3\text{C}(\text{O})\text{OO} + \text{NO} \rightarrow \text{CH}_3 + \text{CO}_2 + \text{NO}_2$                  | $8.1\text{E-}12 * \text{EXP}(270./\text{temp})$                                                                                                      | Tyndall et al. (2001a)                            |

Table 1: Gas phase reactions (... continued)

| #       | labels | reaction                                                                                                                                                        | rate coefficient                                         | reference                                         |
|---------|--------|-----------------------------------------------------------------------------------------------------------------------------------------------------------------|----------------------------------------------------------|---------------------------------------------------|
| G42013  | TrGCN  | $\text{CH}_3\text{C}(\text{O})\text{OO} + \text{NO}_2 \rightarrow \text{PAN}$                                                                                   | k_CH3C03_NO2                                             | Sander et al. (2011)*                             |
| G42014  | TrGCN  | $\text{CH}_3\text{C}(\text{O})\text{OO} + \text{NO}_3 \rightarrow \text{CH}_3 + \text{NO}_2 + \text{CO}_2$                                                      | 4.E-12                                                   | Canosa-Mas et al. (1996)                          |
| G42017a | TrGC   | $\text{CH}_3\text{C}(\text{O})\text{OO} \rightarrow \text{CH}_3 + \text{CO}_2$                                                                                  | k1_R02RC03*0.9                                           | Taraborrelli (2016)                               |
| G42017b | TrGC   | $\text{CH}_3\text{C}(\text{O})\text{OO} \rightarrow \text{CH}_3\text{COOH}$                                                                                     | k1_R02RC03*0.1                                           | Taraborrelli (2016)                               |
| G42018  | TrGC   | $\text{CH}_3\text{C}(\text{O})\text{OOH} + \text{OH} \rightarrow \text{CH}_3\text{C}(\text{O})\text{OO} + \text{H}_2\text{O}$                                   | 0.6*k_CH300H_OH                                          | Rickard and Pascoe (2009)*                        |
| G42020  | TrGCN  | $\text{PAN} + \text{OH} \rightarrow \text{HCHO} + \text{CO} + \text{NO}_2 + \text{H}_2\text{O}$                                                                 | 3.00E-14                                                 | Rickard and Pascoe (2009)                         |
| G42021  | TrGCN  | $\text{PAN} \rightarrow \text{CH}_3\text{C}(\text{O})\text{OO} + \text{NO}_2$                                                                                   | k_PAN_M                                                  | Sander et al. (2011)*                             |
| G42022a | TrGC   | $\text{C}_2\text{H}_2 + \text{OH} \rightarrow \text{GLYOX} + \text{OH}$                                                                                         | k_3rd(temp,cair,5.5e-30,0.0,<br>8.3e-13,2.,0.6)*.71      | Sander et al. (2011), Glowacki et al. (2012)      |
| G42022b | TrGC   | $\text{C}_2\text{H}_2 + \text{OH} \rightarrow \text{HCOOH} + \text{CO} + \text{HO}_2$                                                                           | k_3rd(temp,cair,5.5e-30,0.0,<br>8.3e-13,2.,0.6)*(1.-.71) | Sander et al. (2011), Glowacki et al. (2012)      |
| G42023a | TrGC   | $\text{HOCH}_2\text{CHO} + \text{OH} \rightarrow \text{HOCH}_2\text{CO} + \text{H}_2\text{O}$                                                                   | 8.00E-12*0.80                                            | Atkinson et al. (2006)                            |
| G42023b | TrGC   | $\text{HOCH}_2\text{CHO} + \text{OH} \rightarrow \text{HOCHCHO} + \text{H}_2\text{O}$                                                                           | 8.00E-12*0.20                                            | Atkinson et al. (2006)                            |
| G42024a | TrGC   | $\text{HOCH}_2\text{CO} + \text{O}_2 \rightarrow \text{HOCH}_2\text{CO}_3$                                                                                      | 5.1E-12*(1.-1./(1+1.85E-18*cair))                        | Atkinson et al. (2006), Beyersdorf et al. (2010)* |
| G42024b | TrGC   | $\text{HOCH}_2\text{CO} + \text{O}_2 \rightarrow \text{OH} + \text{HCHO} + \text{CO}_2$                                                                         | 5.1E-12*1./(1+1.85E-18*cair)                             | Atkinson et al. (2006), Beyersdorf et al. (2010)* |
| G42025  | TrGC   | $\text{HOCHCHO} \rightarrow \text{GLYOX} + \text{HO}_2$                                                                                                         | KDEC                                                     | Taraborrelli (2016)                               |
| G42026  | TrGCN  | $\text{HOCH}_2\text{CHO} + \text{NO}_3 \rightarrow \text{HOCH}_2\text{CO} + \text{HNO}_3$                                                                       | KN03AL                                                   | Rickard and Pascoe (2009)                         |
| G42027a | TrGC   | $\text{HOCH}_2\text{CO}_3 \rightarrow \text{HCHO} + \text{CO}_2 + \text{HO}_2$                                                                                  | k1_R02RC03*0.9                                           | Taraborrelli (2016)                               |
| G42027b | TrGC   | $\text{HOCH}_2\text{CO}_3 \rightarrow \text{HOCH}_2\text{CO}_2\text{H}$                                                                                         | k1_R02RC03*0.1                                           | Taraborrelli (2016)                               |
| G42028a | TrGC   | $\text{HOCH}_2\text{CO}_3 + \text{HO}_2 \rightarrow \text{HCHO} + \text{HO}_2 + \text{OH} + \text{CO}_2$                                                        | KAPH02*rco3_oh                                           | Taraborrelli (2016), Groß et al. (2014)           |
| G42028b | TrGC   | $\text{HOCH}_2\text{CO}_3 + \text{HO}_2 \rightarrow \text{HOCH}_2\text{CO}_3\text{H}$                                                                           | KAPH02*rco3_ooh                                          | Taraborrelli (2016), Groß et al. (2014)           |
| G42028c | TrGC   | $\text{HOCH}_2\text{CO}_3 + \text{HO}_2 \rightarrow \text{HOCH}_2\text{CO}_2\text{H} + \text{O}_3$                                                              | KAPH02*rco3_o3                                           | Taraborrelli (2016), Groß et al. (2014)           |
| G42029  | TrGCN  | $\text{HOCH}_2\text{CO}_3 + \text{NO} \rightarrow \text{NO}_2 + \text{HO}_2 + \text{HCHO} + \text{CO}_2$                                                        | KAPNO                                                    | Rickard and Pascoe (2009)                         |
| G42030  | TrGCN  | $\text{HOCH}_2\text{CO}_3 + \text{NO}_2 \rightarrow \text{PHAN}$                                                                                                | k_CH3C03_NO2                                             | Rickard and Pascoe (2009)                         |
| G42031  | TrGCN  | $\text{HOCH}_2\text{CO}_3 + \text{NO}_3 \rightarrow \text{NO}_2 + \text{HO}_2 + \text{HCHO} + \text{CO}_2$                                                      | KR02N03*1.60                                             | Rickard and Pascoe (2009)                         |
| G42032  | TrGC   | $\text{HOCH}_2\text{CO}_2\text{H} + \text{OH} \rightarrow .09 \text{ HCHO} + .09 \text{ CO}_2 + .91 \text{ HCOCO}_2\text{H} + \text{HO}_2 + \text{H}_2\text{O}$ | k_co2h+k_sf_soh*f_co2h                                   | Taraborrelli (2016)                               |
| G42033a | TrGC   | $\text{HOCH}_2\text{CO}_3\text{H} + \text{OH} \rightarrow \text{HOCH}_2\text{CO}_3 + \text{H}_2\text{O}$                                                        | 0.6*k_CH300H_OH                                          | Taraborrelli (2016)                               |
| G42033b | TrGC   | $\text{HOCH}_2\text{CO}_3\text{H} + \text{OH} \rightarrow \text{HCOCO}_3\text{H} + \text{HO}_2$                                                                 | k_sf_soh*f_co2h                                          | Taraborrelli (2016)                               |
| G42034  | TrGCN  | $\text{PHAN} \rightarrow \text{HOCH}_2\text{CO}_3 + \text{NO}_2$                                                                                                | k_PAN_M                                                  | Rickard and Pascoe (2009)                         |

Table 1: Gas phase reactions (... continued)

| #       | labels | reaction                                                                                                                                                       | rate coefficient                                   | reference                                                                     |
|---------|--------|----------------------------------------------------------------------------------------------------------------------------------------------------------------|----------------------------------------------------|-------------------------------------------------------------------------------|
| G42035  | TrGCN  | PHAN + OH $\rightarrow$ HCHO + CO + NO <sub>2</sub> + H <sub>2</sub> O                                                                                         | k_s*f_soh*f_cpan+k_rohro                           | Taraborrelli (2016)                                                           |
| G42036  | TrGC   | GLYOX + OH $\rightarrow$ HCOCO + H <sub>2</sub> O                                                                                                              | 3.1E-12*EXP(340./temp)                             | Atkinson et al. (2006), Orlando and Tyndall (2001), Lockhart et al. (2013)    |
| G42037  | TrGCN  | GLYOX + NO <sub>3</sub> $\rightarrow$ HCOCO + HNO <sub>3</sub>                                                                                                 | KN03AL                                             | Rickard and Pascoe (2009)                                                     |
| G42038a | TrGC   | HCOCO $\rightarrow$ CO + CO + HO <sub>2</sub>                                                                                                                  | 7.E11*EXP(-3160./temp)<br>+5.E-12*c(ind_02)        | Orlando and Tyndall (2001), Lockhart et al. (2013), Rickard and Pascoe (2009) |
| G42037b | TrGC   | HCOCO $\rightarrow$ HCOCO <sub>3</sub>                                                                                                                         | 5.E-12*c(ind_02)*3.2*exp(-550./temp)               | Lockhart et al. (2013), Rickard and Pascoe (2009)                             |
| G42037c | TrGC   | HCOCO $\rightarrow$ OH + CO + CO <sub>2</sub>                                                                                                                  | 5.E-12*c(ind_02)<br>*(1.-3.2*exp(-550./temp))      | Lockhart et al. (2013), Rickard and Pascoe (2009)                             |
| G42039a | TrGC   | HCOCO <sub>3</sub> $\rightarrow$ CO + HO <sub>2</sub> + CO <sub>2</sub>                                                                                        | k1_R02RC03*0.9                                     | Taraborrelli (2016)                                                           |
| G42039b | TrGC   | HCOCO <sub>3</sub> $\rightarrow$ HCOCO <sub>2</sub> H                                                                                                          | k1_R02RC03*0.1                                     | Taraborrelli (2016)                                                           |
| G42040  | TrGC   | HCOCO <sub>3</sub> + HO <sub>2</sub> $\rightarrow$ HO <sub>2</sub> + CO + CO <sub>2</sub> + OH                                                                 | KAPH02                                             | Feierabend et al. (2008), Taraborrelli (2016)                                 |
| G42041  | TrGCN  | HCOCO <sub>3</sub> + NO $\rightarrow$ HO <sub>2</sub> + CO + NO <sub>2</sub> + CO <sub>2</sub>                                                                 | KAPNO                                              | Rickard and Pascoe (2009)                                                     |
| G42042  | TrGCN  | HCOCO <sub>3</sub> + NO <sub>3</sub> $\rightarrow$ HO <sub>2</sub> + CO + NO <sub>2</sub> + CO <sub>2</sub>                                                    | KR02N03*1.60                                       | Rickard and Pascoe (2009)                                                     |
| G42043  | TrGCN  | HCOCO <sub>3</sub> + NO <sub>2</sub> $\rightarrow$ HO <sub>2</sub> + CO + NO <sub>3</sub> + CO <sub>2</sub>                                                    | k_CH3C03_N02                                       | Orlando and Tyndall (2001), Taraborrelli (2016)                               |
| G42044  | TrGC   | HCOCO <sub>2</sub> H + OH $\rightarrow$ CO + HO <sub>2</sub> + CO <sub>2</sub> + H <sub>2</sub> O                                                              | k_co2h+k_t*f_o*f_co2h                              | Taraborrelli (2016)                                                           |
| G42045a | TrGC   | HCOCO <sub>3</sub> H + OH $\rightarrow$ HCOCO <sub>3</sub> + H <sub>2</sub> O                                                                                  | 0.6*k_CH300H_OH                                    | Taraborrelli (2016)                                                           |
| G42045b | TrGC   | HCOCO <sub>3</sub> H + OH $\rightarrow$ CO + CO <sub>2</sub> + H <sub>2</sub> O + OH                                                                           | k_t*f_o*f_co2h                                     | Taraborrelli (2016)                                                           |
| G42046  | TrGC   | HOCH <sub>2</sub> CH <sub>2</sub> O <sub>2</sub> $\rightarrow$ .6 HOCH <sub>2</sub> CH <sub>2</sub> O + .2 HOCH <sub>2</sub> CHO + .2 ETHGLY                   | 2.*(7.8E-14*EXP(1000./temp)<br>*k_CH302)**(.5)*R02 | Atkinson et al. (2006), Rickard and Pascoe (2009)                             |
| G42047  | TrGCN  | HOCH <sub>2</sub> CH <sub>2</sub> O <sub>2</sub> + NO $\rightarrow$ .25 HO <sub>2</sub> + .5 HCHO + .75 HOCH <sub>2</sub> CH <sub>2</sub> O + NO <sub>2</sub>  | KR02N0*(1.-alpha_AN(3,1,0,0,0, temp, cair))        | Rickard and Pascoe (2009)*                                                    |
| G42048  | TrGCN  | HOCH <sub>2</sub> CH <sub>2</sub> O <sub>2</sub> + NO $\rightarrow$ ETHOHNO3                                                                                   | KR02N0*alpha_AN(3,1,0,0,0,temp, cair)              | Taraborrelli (2016)                                                           |
| G42049a | TrGC   | HOCH <sub>2</sub> CH <sub>2</sub> O <sub>2</sub> + HO <sub>2</sub> $\rightarrow$ HYETHO2H                                                                      | 1.53E-13*EXP(1300./temp)<br>*(1.-rchohch2o2_oh)    | Rickard and Pascoe (2009)                                                     |
| G42049b | TrGC   | HOCH <sub>2</sub> CH <sub>2</sub> O <sub>2</sub> + HO <sub>2</sub> $\rightarrow$ HOCH <sub>2</sub> CH <sub>2</sub> O + OH                                      | 1.53E-13*EXP(1300./temp)<br>*rchohch2o2_oh         | Rickard and Pascoe (2009)                                                     |
| G42050  | TrGCN  | ETHOHNO3 + OH $\rightarrow$ .93 NO <sub>3</sub> CH <sub>2</sub> CHO + .93 HO <sub>2</sub> + .07 HOCH <sub>2</sub> CHO + .07 NO <sub>2</sub> + H <sub>2</sub> O | k_s*(f_soh*f_ch2ono2+f_ono2*f_pch2oh)+k_rohro      | Taraborrelli (2016)                                                           |

Table 1: Gas phase reactions (... continued)

| #       | labels | reaction                                                                                                                                       | rate coefficient                                                                        | reference                                 |
|---------|--------|------------------------------------------------------------------------------------------------------------------------------------------------|-----------------------------------------------------------------------------------------|-------------------------------------------|
| G42051a | TrGC   | $\text{HYETHO}_2\text{H} + \text{OH} \rightarrow \text{HOCH}_2\text{CH}_2\text{O}_2 + \text{H}_2\text{O}$                                      | $0.6 \cdot k_{\text{CH300H\_OH}}$                                                       | Rickard and Pascoe (2009)*                |
| G42051b | TrGC   | $\text{HYETHO}_2\text{H} + \text{OH} \rightarrow \text{HOCH}_2\text{CHO} + \text{OH} + \text{H}_2\text{O}$                                     | $k_{\text{s*f\_sooh*f\_pch2oh}}$                                                        | Taraborrelli (2016)                       |
| G42051c | TrGC   | $\text{HYETHO}_2\text{H} + \text{OH} \rightarrow \text{HOOCH}_2\text{CHO} + \text{HO}_2 + \text{H}_2\text{O}$                                  | $k_{\text{s*f\_soh*f\_pch2oh}+k_{\text{rohro}}}$                                        | Taraborrelli (2016)                       |
| G42052a | TrGC   | $\text{HOCH}_2\text{CH}_2\text{O} \rightarrow \text{HO}_2 + \text{HOCH}_2\text{CHO}$                                                           | $6.00\text{E-}14 \cdot \text{EXP}(-550./\text{temp})$<br>$\cdot C(\text{ind\_02})$      | Rickard and Pascoe (2009)                 |
| G42052b | TrGC   | $\text{HOCH}_2\text{CH}_2\text{O} \rightarrow \text{HO}_2 + \text{HCHO} + \text{HCHO}$                                                         | $9.50\text{E}13 \cdot \text{EXP}(-5988./\text{temp})$                                   | Rickard and Pascoe (2009)                 |
| G42053  | TrGC   | $\text{ETHGLY} + \text{OH} \rightarrow \text{HOCH}_2\text{CHO} + \text{HO}_2 + \text{H}_2\text{O}$                                             | $2 \cdot k_{\text{s*f\_soh*f\_pch2oh}} + 2 \cdot k_{\text{rohro}}$                      | Taraborrelli (2016)                       |
| G42054  | TrGC   | $\text{HCOCH}_2\text{O}_2 \rightarrow .6 \text{ HCHO} + .6 \text{ CO} + .6 \text{ HO}_2 + .2 \text{ GLYOX}$<br>$+ .2 \text{ HOCH}_2\text{CHO}$ | $k1_{\text{R02p0R02}}$                                                                  | Taraborrelli (2016)                       |
| G42055a | TrGC   | $\text{HCOCH}_2\text{O}_2 + \text{HO}_2 \rightarrow \text{HOOCH}_2\text{CHO}$                                                                  | $\text{KR02H02}(2) \cdot r_{\text{coch2o2\_ooh}}$                                       | Taraborrelli (2016)                       |
| G42055b | TrGC   | $\text{HCOCH}_2\text{O}_2 + \text{HO}_2 \rightarrow \text{HCHO} + \text{CO} + \text{HO}_2 + \text{OH}$                                         | $\text{KR02H02}(2) \cdot r_{\text{coch2o2\_oh}}$                                        | Taraborrelli (2016)                       |
| G42056a | TrGCN  | $\text{HCOCH}_2\text{O}_2 + \text{NO} \rightarrow \text{NO}_2 + \text{HCHO} + \text{CO} + \text{HO}_2$                                         | $\text{KR02N0} \cdot (1 - \alpha_{\text{AN}}(3, 1, 1, 0, 0, \text{temp}, \text{cair}))$ | Taraborrelli (2016)                       |
| G42056b | TrGCN  | $\text{HCOCH}_2\text{O}_2 + \text{NO} \rightarrow \text{NO}_3\text{CH}_2\text{CHO}$                                                            | $\text{KR02N0} \cdot \alpha_{\text{AN}}(3, 1, 1, 0, 0, \text{temp}, \text{cair})$       | Taraborrelli (2016)                       |
| G42057  | TrGCN  | $\text{HCOCH}_2\text{O}_2 + \text{NO}_3 \rightarrow \text{HCHO} + \text{CO} + \text{HO}_2 + \text{NO}_2$                                       | $\text{KR02N03}$                                                                        | Taraborrelli (2016)                       |
| G42058a | TrGC   | $\text{HOOCH}_2\text{CHO} + \text{OH} \rightarrow \text{HCOCH}_2\text{O}_2$                                                                    | $0.6 \cdot k_{\text{CH300H\_OH}}$                                                       | Taraborrelli (2016)                       |
| G42058b | TrGC   | $\text{HOOCH}_2\text{CHO} + \text{OH} \rightarrow \text{HCHO} + \text{CO} + \text{OH}$                                                         | $.8 \cdot 8.\text{E-}12$                                                                | Taraborrelli (2016)*                      |
| G42058c | TrGC   | $\text{HOOCH}_2\text{CHO} + \text{OH} \rightarrow \text{GLYOX} + \text{OH}$                                                                    | $k_{\text{s*f\_sooh*f\_cho}}$                                                           | Taraborrelli (2016)                       |
| G42059  | TrGCN  | $\text{HOOCH}_2\text{CHO} + \text{NO}_3 \rightarrow \text{OH} + \text{HCHO} + \text{CO} + \text{HNO}_3$                                        | $\text{KN03AL}$                                                                         | Rickard and Pascoe (2009)                 |
| G42060  | TrGCN  | $\text{HOOCH}_2\text{CO}_3 + \text{NO} \rightarrow \text{NO}_2 + \text{OH} + \text{HCHO} + \text{CO}_2$                                        | $\text{KAPNO}$                                                                          | Taraborrelli (2016)                       |
| G42061  | TrGCN  | $\text{HOOCH}_2\text{CO}_3 + \text{NO}_3 \rightarrow \text{NO}_2 + \text{OH} + \text{HCHO} + \text{CO}_2$                                      | $\text{KR02N03} \cdot 1.60$                                                             | Taraborrelli (2016)                       |
| G42062a | TrGC   | $\text{HOOCH}_2\text{CO}_3 + \text{HO}_2 \rightarrow 2 \text{ OH} + \text{HCHO} + \text{CO}_2$                                                 | $\text{KAPH02} \cdot r_{\text{co3\_oh}}$                                                | Taraborrelli (2016)                       |
| G42062b | TrGC   | $\text{HOOCH}_2\text{CO}_3 + \text{HO}_2 \rightarrow \text{HOOCH}_2\text{CO}_3\text{H}$                                                        | $\text{KAPH02} \cdot r_{\text{co3\_ooh}}$                                               | Taraborrelli (2016)                       |
| G42062c | TrGC   | $\text{HOOCH}_2\text{CO}_3 + \text{HO}_2 \rightarrow \text{HOOCH}_2\text{CO}_2\text{H} + \text{O}_3$                                           | $\text{KAPH02} \cdot r_{\text{co3\_o3}}$                                                | Taraborrelli (2016)                       |
| G42063a | TrGC   | $\text{HOOCH}_2\text{CO}_3 \rightarrow \text{OH} + \text{HCHO} + \text{CO}_2$                                                                  | $k1_{\text{R02RC03}} \cdot 0.9$                                                         | Taraborrelli (2016)                       |
| G42063b | TrGC   | $\text{HOOCH}_2\text{CO}_3 \rightarrow \text{HOOCH}_2\text{CO}_2\text{H}$                                                                      | $k1_{\text{R02RC03}} \cdot 0.1$                                                         | Taraborrelli (2016)                       |
| G42064a | TrGC   | $\text{HOOCH}_2\text{CO}_3\text{H} + \text{OH} \rightarrow \text{HOOCH}_2\text{CO}_3 + \text{H}_2\text{O}$                                     | $2 \cdot 0.6 \cdot k_{\text{CH300H\_OH}}$                                               | Taraborrelli (2016)                       |
| G42064b | TrGC   | $\text{HOOCH}_2\text{CO}_3\text{H} + \text{OH} \rightarrow \text{HCOCO}_3\text{H} + \text{OH} + \text{H}_2\text{O}$                            | $k_{\text{s*f\_sooh*f\_co2h}}$                                                          | Taraborrelli (2016)                       |
| G42065  | TrGC   | $\text{HOOCH}_2\text{CO}_2\text{H} + \text{OH} \rightarrow \text{HCOCO}_2\text{H} + \text{OH} + \text{H}_2\text{O}$                            | $k_{\text{s*f\_sooh*f\_co2h}} + k_{\text{co2h}}$                                        | Taraborrelli (2016)                       |
| G42066  | TrGC   | $\text{CH}_2\text{CO} + \text{OH} \rightarrow .6 \text{ HCHO} + .6 \text{ HO}_2 + .6 \text{ CO} + .4$<br>$\text{HOOCH}_2\text{CO}_2\text{H}$   | $2.8\text{E-}12 \cdot \exp(510./\text{temp})$                                           | Baulch et al. (2005), Taraborrelli (2016) |
| G42067a | TrGC   | $\text{CH}_3\text{CHOHOOH} + \text{OH} \rightarrow \text{CH}_3\text{COOH} + \text{OH}$                                                         | $(k_{\text{t*f\_tooh*f\_toh}} + k_{\text{rohro}})$                                      | Taraborrelli (2016)                       |
| G42067b | TrGC   | $\text{CH}_3\text{CHOHOOH} + \text{OH} \rightarrow \text{CH}_3\text{CHOHO}_2$                                                                  | $0.6 \cdot k_{\text{CH300H\_OH}}$                                                       | Taraborrelli (2016)                       |

Table 1: Gas phase reactions (... continued)

| #       | labels  | reaction                                                                                                                                                                      | rate coefficient                                                                                                                            | reference                                         |
|---------|---------|-------------------------------------------------------------------------------------------------------------------------------------------------------------------------------|---------------------------------------------------------------------------------------------------------------------------------------------|---------------------------------------------------|
| G42068  | TrGC    | $\text{CH}_3\text{CHOHO}_2 \rightarrow \text{CH}_3\text{CHO} + \text{HO}_2$                                                                                                   | $3.46\text{E}12 \cdot \text{EXP}(-12500./ (1.98 \cdot \text{temp}))$                                                                        | Hermans et al. (2005), Taraborrelli (2016)        |
| G42069  | TrGC    | $\text{CH}_3\text{CHO} + \text{HO}_2 \rightarrow \text{CH}_3\text{CHOHO}_2$                                                                                                   | $3.46\text{E}12 \cdot \text{EXP}(-12500./ (1.98 \cdot \text{temp})) / (6.34\text{E}26 \cdot \text{EXP}(-14700./ (1.98 \cdot \text{temp})))$ | Hermans et al. (2005), Taraborrelli (2016)        |
| G42070  | TrGC    | $\text{CH}_3\text{CHOHO}_2 + \text{HO}_2 \rightarrow .5 \text{ CH}_3\text{CHOHOOH} + .3 \text{ CH}_3\text{COOH} + .2 \text{ CH}_3 + .2 \text{ HCOOH} + .2 \text{ OH}$         | $5.6\text{E}-15 \cdot \text{EXP}(2300./ \text{temp})$                                                                                       | Taraborrelli (2016)                               |
| G42071  | TrGC    | $\text{CH}_3\text{CHOHO}_2 \rightarrow \text{CH}_3 + \text{HCOOH} + \text{OH}$                                                                                                | k1_R02s0R02                                                                                                                                 | Taraborrelli (2016)                               |
| G42072  | TrGCN   | $\text{CH}_3\text{CHOHO}_2 + \text{NO} \rightarrow \text{CH}_3 + \text{HCOOH} + \text{OH} + \text{NO}_2$                                                                      | KR02N0                                                                                                                                      | Taraborrelli (2016)                               |
| G42073  | TrGCN   | $\text{C}_2\text{H}_5\text{ONO}_2 + \text{OH} \rightarrow \text{CH}_3\text{CHO} + \text{H}_2\text{O} + \text{NO}_2$                                                           | $6.7\text{E}-13 \cdot \text{EXP}(-395./ \text{temp})$                                                                                       | Atkinson et al. (2006)                            |
| G42074a | TrGCN   | $\text{NO}_3\text{CH}_2\text{CHO} + \text{OH} \rightarrow \text{GLYOX} + \text{NO}_2 + \text{H}_2\text{O}$                                                                    | k_s*f_ch2ono2*f_cho                                                                                                                         | Paulot et al. (2009a), Taraborrelli (2016)*       |
| G42074b | TrGCN   | $\text{NO}_3\text{CH}_2\text{CHO} + \text{OH} \rightarrow \text{NO}_3\text{CH}_2\text{CO}_3 + \text{H}_2\text{O}$                                                             | k_t*f_o*f_ch2ono2*3.                                                                                                                        | Paulot et al. (2009a), Taraborrelli (2016)*       |
| G42075  | TrGCN   | $\text{NO}_3\text{CH}_2\text{CO}_3 + \text{HO}_2 \rightarrow \text{HCHO} + \text{NO}_2 + \text{CO}_2 + \text{OH}$                                                             | KAPH02                                                                                                                                      | Rickard and Pascoe (2009)*                        |
| G42076  | TrGCN   | $\text{NO}_3\text{CH}_2\text{CO}_3 + \text{NO} \rightarrow \text{HCHO} + \text{NO}_2 + \text{CO}_2 + \text{NO}_2$                                                             | KAPN0                                                                                                                                       | Rickard and Pascoe (2009)                         |
| G42077  | TrGCN   | $\text{NO}_3\text{CH}_2\text{CO}_3 + \text{NO}_2 \rightarrow \text{NO}_3\text{CH}_2\text{CHO}$                                                                                | k_CH3C03_N02                                                                                                                                | Rickard and Pascoe (2009)                         |
| G42078  | TrGCN   | $\text{NO}_3\text{CH}_2\text{CO}_3 \rightarrow \text{HCHO} + \text{NO}_2 + \text{CO}_2$                                                                                       | k1_R02RC03                                                                                                                                  | Rickard and Pascoe (2009)*                        |
| G42079  | TrGCN   | $\text{NO}_3\text{CH}_2\text{CHO} \rightarrow \text{NO}_3\text{CH}_2\text{CO}_3 + \text{NO}_2$                                                                                | k_PAN_M                                                                                                                                     | Rickard and Pascoe (2009)                         |
| G42080  | StTrGCN | $\text{C}_2\text{H}_5\text{O}_2 + \text{NO}_2 \rightarrow \text{C}_2\text{H}_5\text{O}_2\text{NO}_2$                                                                          | k_3rd_iupac(temp, cair, 1.3E-29, 6.2, 8.8E-12, 0.0, 0.31)                                                                                   | Atkinson et al. (2006)                            |
| G42081  | StTrGCN | $\text{C}_2\text{H}_5\text{O}_2\text{NO}_2 \rightarrow \text{C}_2\text{H}_5\text{O}_2 + \text{NO}_2$                                                                          | k_3rd_iupac(temp, cair, REAL(4.8E-4*EXP(-9285./temp), SP), 0.0, REAL(8.8E15*EXP(-10440./temp), SP), 0.0, 0.31)                              | Atkinson et al. (2006)                            |
| G42082  | StTrGCN | $\text{C}_2\text{H}_5\text{O}_2\text{NO}_2 + \text{OH} \rightarrow \text{CH}_3\text{CHO} + \text{NO}_3 + \text{H}_2\text{O}$                                                  | $9.50\text{E}-13 \cdot \text{EXP}(-650./ \text{temp})$                                                                                      | Taraborrelli (2016)*                              |
| G42083a | TrGC    | $\text{CH}_3\text{C}(\text{O}) + \text{O}_2 \rightarrow \text{CH}_3\text{C}(\text{O})\text{OO}$                                                                               | $5.1\text{E}-12 \cdot (1. - 1./ (1. + 9.4\text{E}-18 \cdot \text{cair}))$                                                                   | Atkinson et al. (2006), Beyersdorf et al. (2010)* |
| G42083b | TrGC    | $\text{CH}_3\text{C}(\text{O}) + \text{O}_2 \rightarrow \text{OH} + \text{HCHO} + \text{CO}$                                                                                  | $5.1\text{E}-12 \cdot 1./ (1. + 9.4\text{E}-18 \cdot \text{cair})$                                                                          | Atkinson et al. (2006), Beyersdorf et al. (2010)* |
| G42084  | TrGC    | $\text{C}_2\text{H}_5\text{OH} + \text{OH} \rightarrow .95 \text{ C}_2\text{H}_5\text{O}_2 + .95 \text{ HO}_2 + .05 \text{ HOCH}_2\text{CH}_2\text{O}_2 + \text{H}_2\text{O}$ | $3.0\text{E}-12 \cdot \text{EXP}(20./ \text{temp})$                                                                                         | Taraborrelli (2016), Atkinson et al. (2006)       |
| G42085a | TrGCN   | $\text{CH}_3\text{CN} + \text{OH} \rightarrow \text{NCCH}_2\text{O}_2 + \text{H}_2\text{O}$                                                                                   | $8.1\text{E}-13 \cdot \text{EXP}(-1080./ \text{temp}) \cdot 0.40$                                                                           | Atkinson et al. (2006), Tyndall et al. (2001b)*   |

Table 1: Gas phase reactions (... continued)

| #       | labels | reaction                                                                                                                                                                                                                                           | rate coefficient                                                                                                           | reference                                         |
|---------|--------|----------------------------------------------------------------------------------------------------------------------------------------------------------------------------------------------------------------------------------------------------|----------------------------------------------------------------------------------------------------------------------------|---------------------------------------------------|
| G42085b | TrGCN  | $\text{CH}_3\text{CN} + \text{OH} \rightarrow \text{OH} + \text{CH}_3\text{C}(\text{O}) + \text{NO}$                                                                                                                                               | $8.1\text{E-}13 \cdot \text{EXP}(-1080./\text{temp}) \cdot (1.-0.40)$                                                      | Atkinson et al. (2006), Tyndall et al. (2001b)*   |
| G42086a | TrGCN  | $\text{CH}_3\text{CN} + \text{O}(^1\text{D}) \rightarrow \text{O}(^3\text{P}) + \text{CH}_3\text{CN}$                                                                                                                                              | $2.54\text{E-}10 \cdot \text{EXP}(-24./\text{temp})$<br>$\cdot 0.0269 \cdot \text{EXP}(137./\text{temp})$                  | Strekowski et al. (2010)                          |
| G42086b | TrGCN  | $\text{CH}_3\text{CN} + \text{O}(^1\text{D}) \rightarrow 2 \text{H} + \text{CO} + \text{HCN}$                                                                                                                                                      | $2.54\text{E-}10 \cdot \text{EXP}(-24./\text{temp}) \cdot 0.16$                                                            | Strekowski et al. (2010)*                         |
| G42086c | TrGCN  | $\text{CH}_3\text{CN} + \text{O}(^1\text{D}) \rightarrow .5 \text{CH}_3 + .5 \text{NCO} + .5 \text{NCCH}_2\text{O}_2 + .5 \text{OH}$                                                                                                               | $2.54\text{E-}10 \cdot \text{EXP}(-24./\text{temp}) \cdot (1.-(0.16+0.0269 \cdot \text{EXP}(137./\text{temp})))$           | Strekowski et al. (2010)*                         |
| G42087  | TrGCN  | $\text{NCCH}_2\text{O}_2 + \text{NO} \rightarrow \text{HCN} + \text{CO}_2 + \text{HO}_2 + \text{NO}_2$                                                                                                                                             | KR02N0                                                                                                                     | see note*                                         |
| G42088  | TrGCN  | $\text{NCCH}_2\text{O}_2 + \text{HO}_2 \rightarrow \text{HCN} + \text{CO}_2 + \text{HO}_2$                                                                                                                                                         | KR02H02(2)                                                                                                                 | see note*                                         |
| G42089a | TrGC   | $\text{CH}_2\text{CHOH} + \text{OH} \rightarrow \text{HCOOH} + \text{OH} + \text{HCHO}$                                                                                                                                                            | k_CH2CHOH_OH_HCOOH                                                                                                         | Taraborrelli (2016), So et al. (2014)*            |
| G42089b | TrGC   | $\text{CH}_2\text{CHOH} + \text{OH} \rightarrow \text{HOCH}_2\text{CHO} + \text{HO}_2$                                                                                                                                                             | k_CH2CHOH_OH_ALD                                                                                                           | Taraborrelli (2016), So et al. (2014)             |
| G42090  | TrGC   | $\text{CH}_2\text{CHOH} + \text{HCOOH} \rightarrow \text{CH}_3\text{CHO} + \text{HCOOH}$                                                                                                                                                           | k_CH2CHOH_HCOOH                                                                                                            | Taraborrelli (2016), daSilva (2010)*              |
| G42091  | TrGC   | $\text{CH}_3\text{CHO} + \text{HCOOH} \rightarrow \text{CH}_2\text{CHOH} + \text{HCOOH}$                                                                                                                                                           | k_ALD_HCOOH                                                                                                                | Taraborrelli (2016), daSilva (2010)*              |
| G43000a | TrGC   | $\text{C}_3\text{H}_8 + \text{OH} \rightarrow \text{iC}_3\text{H}_7\text{O}_2 + \text{H}_2\text{O}$                                                                                                                                                | k_s                                                                                                                        | Taraborrelli (2016)                               |
| G43000b | TrGC   | $\text{C}_3\text{H}_8 + \text{OH} \rightarrow \text{C}_3\text{H}_7\text{O}_2 + \text{H}_2\text{O}$                                                                                                                                                 | 2.*k_p                                                                                                                     | Taraborrelli (2016)                               |
| G43001a | TrGC   | $\text{C}_3\text{H}_6 + \text{O}_3 \rightarrow \text{HCHO} + .16 \text{CH}_3\text{CHOHOOH} + .50 \text{OH} + .50 \text{HCOCH}_2\text{O}_2 + .05 \text{CH}_2\text{CO} + .09 \text{CH}_3\text{OH} + .09 \text{CO} + .2 \text{CH}_4 + .2 \text{CO}_2$ | $5.5\text{E-}15 \cdot \text{EXP}(-1880./\text{temp}) \cdot .57$                                                            | Atkinson et al. (2006)*                           |
| G43001b | TrGC   | $\text{C}_3\text{H}_6 + \text{O}_3 \rightarrow \text{CH}_3\text{CHO} + \text{CH}_2\text{OO}^*$                                                                                                                                                     | $5.5\text{E-}15 \cdot \text{EXP}(-1880./\text{temp}) \cdot .43$                                                            | Atkinson et al. (2006)*                           |
| G43002  | TrGC   | $\text{C}_3\text{H}_6 + \text{OH} \rightarrow \text{HYPROPO}_2$                                                                                                                                                                                    | k_3rd_iupac(temp, cair, 8.6E-27, 3.5, 3.E-11, 1., 0.5)                                                                     | Atkinson et al. (2006), Rickard and Pascoe (2009) |
| G43003  | TrGCN  | $\text{C}_3\text{H}_6 + \text{NO}_3 \rightarrow \text{PRONO}_3\text{BO}_2$                                                                                                                                                                         | $4.6\text{E-}13 \cdot \text{EXP}(-1155./\text{temp})$                                                                      | Wallington et al.                                 |
| G43004  | TrGC   | $\text{iC}_3\text{H}_7\text{O}_2 + \text{HO}_2 \rightarrow \text{iC}_3\text{H}_7\text{OOH}$                                                                                                                                                        | $1.9\text{E-}13 \cdot \text{EXP}(1300./\text{temp})$                                                                       | Atkinson (1997)*                                  |
| G43005a | TrGCN  | $\text{iC}_3\text{H}_7\text{O}_2 + \text{NO} \rightarrow \text{CH}_3\text{COCH}_3 + \text{HO}_2 + \text{NO}_2$                                                                                                                                     | $2.7\text{E-}12 \cdot \text{EXP}(360./\text{temp}) \cdot (1.-\alpha_{\text{AN}}(3, 2, 0, 0, 0, \text{temp}, \text{cair}))$ | Wallington et al.                                 |
| G43005b | TrGCN  | $\text{iC}_3\text{H}_7\text{O}_2 + \text{NO} \rightarrow \text{iC}_3\text{H}_7\text{ONO}_2$                                                                                                                                                        | $2.7\text{E-}12 \cdot \text{EXP}(360./\text{temp}) \cdot \alpha_{\text{AN}}(3, 2, 0, 0, 0, \text{temp}, \text{cair})$      | Wallington et al.                                 |
| G43006  | TrGC   | $\text{iC}_3\text{H}_7\text{O}_2 \rightarrow .8 \text{CH}_3\text{COCH}_3 + .2 \text{IPROPOL} + .6 \text{HO}_2$                                                                                                                                     | $2 \cdot (1.6\text{E-}12 \cdot \text{EXP}(-2200./\text{temp}) \cdot \text{k\_CH302}) \cdot (.5) \cdot \text{R02}$          | Rickard and Pascoe (2009), Atkinson et al. (2006) |
| G43007a | TrGC   | $\text{iC}_3\text{H}_7\text{OOH} + \text{OH} \rightarrow \text{iC}_3\text{H}_7\text{O}_2 + \text{H}_2\text{O}$                                                                                                                                     | 0.6*k_CH300H_OH                                                                                                            | Taraborrelli (2016)                               |
| G43007b | TrGC   | $\text{iC}_3\text{H}_7\text{OOH} + \text{OH} \rightarrow \text{CH}_3\text{COCH}_3 + \text{H}_2\text{O} + \text{OH}$                                                                                                                                | k_t*f_tooh                                                                                                                 | Taraborrelli (2016)                               |

Table 1: Gas phase reactions (... continued)

| #       | labels | reaction                                                                                                                                                         | rate coefficient                                                                                                   | reference                                             |
|---------|--------|------------------------------------------------------------------------------------------------------------------------------------------------------------------|--------------------------------------------------------------------------------------------------------------------|-------------------------------------------------------|
| G43008  | TrGC   | $\text{C}_3\text{H}_7\text{O}_2 + \text{HO}_2 \rightarrow \text{C}_3\text{H}_7\text{OOH}$                                                                        | $1.9\text{E}-13 \cdot \text{EXP}(1300./\text{temp})$                                                               | Atkinson (1997)*                                      |
| G43009a | TrGCN  | $\text{C}_3\text{H}_7\text{O}_2 + \text{NO} \rightarrow \text{C}_2\text{H}_5\text{CHO} + \text{HO}_2 + \text{NO}_2$                                              | $2.7\text{E}-12 \cdot \text{EXP}(360./\text{temp}) \cdot (1.-\text{alpha\_AN}(3,1,0,0,0,\text{temp},\text{cair}))$ | Wallington et al.                                     |
| G43009b | TrGCN  | $\text{C}_3\text{H}_7\text{O}_2 + \text{NO} \rightarrow \text{C}_3\text{H}_7\text{ONO}_2$                                                                        | $2.7\text{E}-12 \cdot \text{EXP}(360./\text{temp}) \cdot \text{alpha\_AN}(3,1,0,0,0,\text{temp},\text{cair})$      | Wallington et al.                                     |
| G43010  | TrGC   | $\text{C}_3\text{H}_7\text{O}_2 \rightarrow .8 \text{ CH}_3\text{COCH}_3 + .2 \text{ NPROPOL} + .6 \text{ HO}_2$                                                 | $2. \cdot (\text{k\_CH302} \cdot 3.\text{E}-13) \cdot (.5) \cdot \text{R02}$                                       | Rickard and Pascoe (2009),<br>Atkinson et al. (2006)  |
| G43011  | TrGC   | $\text{CH}_3\text{COCH}_3 + \text{OH} \rightarrow \text{CH}_3\text{COCH}_2\text{O}_2 + \text{H}_2\text{O}$                                                       | $(8.8\text{E}-12 \cdot \text{EXP}(-1320./\text{temp}) + 1.7\text{E}-14 \cdot \text{EXP}(423./\text{temp}))$        | Atkinson et al. (2006)*                               |
| G43012a | TrGC   | $\text{CH}_3\text{COCH}_2\text{O}_2 + \text{HO}_2 \rightarrow \text{CH}_3\text{COCH}_2\text{O}_2\text{H}$                                                        | $8.6\text{E}-13 \cdot \text{EXP}(700./\text{temp}) \cdot \text{rcoch2o2\_ooh}$                                     | Tyndall et al. (2001a), Taraborrelli (2016)           |
| G43012b | TrGC   | $\text{CH}_3\text{COCH}_2\text{O}_2 + \text{HO}_2 \rightarrow \text{OH} + \text{CH}_3\text{C}(\text{O}) + \text{HCHO}$                                           | $8.6\text{E}-13 \cdot \text{EXP}(700./\text{temp}) \cdot \text{rcoch2o2\_oh}$                                      | Tyndall et al. (2001a), Taraborrelli (2016)           |
| G43013a | TrGCN  | $\text{CH}_3\text{COCH}_2\text{O}_2 + \text{NO} \rightarrow \text{CH}_3\text{C}(\text{O}) + \text{HCHO} + \text{NO}_2$                                           | $2.9\text{E}-12 \cdot \text{EXP}(300./\text{temp}) \cdot (1.-\text{alpha\_AN}(4,1,1,0,0,\text{temp},\text{cair}))$ | Sander et al. (2011)                                  |
| G43013b | TrGCN  | $\text{CH}_3\text{COCH}_2\text{O}_2 + \text{NO} \rightarrow \text{NOA}$                                                                                          | $2.9\text{E}-12 \cdot \text{EXP}(300./\text{temp}) \cdot \text{alpha\_AN}(4,1,1,0,0,\text{temp},\text{cair})$      | Sander et al. (2011)                                  |
| G43014  | TrGC   | $\text{CH}_3\text{COCH}_2\text{O}_2 \rightarrow .3 \text{ CH}_3\text{C}(\text{O}) + .3 \text{ HCHO} + .5 \text{ MGLYOX} + .2 \text{ CH}_3\text{COCH}_2\text{OH}$ | $\text{k1\_R02p0R02}$                                                                                              | Orlando and Tyndall (2012)                            |
| G43015a | TrGC   | $\text{CH}_3\text{COCH}_2\text{O}_2\text{H} + \text{OH} \rightarrow \text{CH}_3\text{COCH}_2\text{O}_2 + \text{H}_2\text{O}$                                     | $0.6 \cdot \text{k\_CH300H\_OH}$                                                                                   | see note*                                             |
| G43015b | TrGC   | $\text{CH}_3\text{COCH}_2\text{O}_2\text{H} + \text{OH} \rightarrow \text{MGLYOX} + \text{OH} + \text{H}_2\text{O}$                                              | $\text{k\_s} \cdot \text{f\_sooh} \cdot \text{f\_co}$                                                              | Taraborrelli (2016)                                   |
| G43016  | TrGC   | $\text{CH}_3\text{COCH}_2\text{OH} + \text{OH} \rightarrow \text{MGLYOX} + \text{HO}_2 + \text{H}_2\text{O}$                                                     | $1.6\text{E}-12 \cdot \text{EXP}(305./\text{temp})$                                                                | Atkinson et al. (2006)                                |
| G43017  | TrGC   | $\text{MGLYOX} + \text{OH} \rightarrow .4 \text{ CH}_3 + .6 \text{ CH}_3\text{C}(\text{O}) + 1.4 \text{ CO} + \text{H}_2\text{O}$                                | $1.9\text{E}-12 \cdot \text{EXP}(575./\text{temp})$                                                                | Baeza-Romero et al. (2007),<br>Atkinson et al. (2006) |
| G43020  | TrGCN  | $\text{iC}_3\text{H}_7\text{ONO}_2 + \text{OH} \rightarrow \text{CH}_3\text{COCH}_3 + \text{NO}_2$                                                               | $6.2\text{E}-13 \cdot \text{EXP}(-230./\text{temp})$                                                               | Wallington et al.                                     |
| G43021  | TrGCN  | $\text{CH}_3\text{COCH}_2\text{O}_2 + \text{NO}_3 \rightarrow \text{CH}_3\text{C}(\text{O}) + \text{HCHO} + \text{NO}_2$                                         | $\text{KR02N03}$                                                                                                   | Rickard and Pascoe (2009)                             |
| G43022  | TrGC   | $\text{HYPROPO2} \rightarrow \text{CH}_3\text{CHO} + \text{HCHO} + \text{HO}_2$                                                                                  | $\text{k1\_R02s0R02}$                                                                                              | Rickard and Pascoe (2009)                             |
| G43023a | TrGC   | $\text{HYPROPO2} + \text{HO}_2 \rightarrow \text{HYPROPO2H}$                                                                                                     | $\text{KR02H02}(3) \cdot (1.-\text{rchohch2o2\_oh})$                                                               | Rickard and Pascoe (2009)                             |
| G43023b | TrGC   | $\text{HYPROPO2} + \text{HO}_2 \rightarrow \text{CH}_3\text{CHO} + \text{HCHO} + \text{HO}_2 + \text{OH}$                                                        | $\text{KR02H02}(3) \cdot \text{rchohch2o2\_oh}$                                                                    | Rickard and Pascoe (2009)                             |
| G43024a | TrGCN  | $\text{HYPROPO2} + \text{NO} \rightarrow \text{CH}_3\text{CHO} + \text{HCHO} + \text{HO}_2 + \text{NO}_2$                                                        | $\text{KR02N0} \cdot (1.-\text{alpha\_AN}(4,1,0,0,0,\text{temp},\text{cair}))$                                     | Rickard and Pascoe (2009)                             |
| G43024b | TrGCN  | $\text{HYPROPO2} + \text{NO} \rightarrow \text{PROPOLNO3}$                                                                                                       | $\text{KR02N0} \cdot \text{alpha\_AN}(4,1,0,0,0,\text{temp},\text{cair})$                                          | Rickard and Pascoe (2009)                             |
| G43025  | TrGCN  | $\text{HYPROPO2} + \text{NO}_3 \rightarrow \text{CH}_3\text{CHO} + \text{HCHO} + \text{HO}_2 + \text{NO}_2$                                                      | $\text{KR02N03}$                                                                                                   | Rickard and Pascoe (2009)                             |
| G43026a | TrGC   | $\text{HYPROPO2H} + \text{OH} \rightarrow \text{HYPROPO2}$                                                                                                       | $0.6 \cdot \text{k\_CH300H\_OH}$                                                                                   | Rickard and Pascoe (2009)                             |

Table 1: Gas phase reactions (... continued)

| #       | labels | reaction                                                                                                                                                                                                           | rate coefficient                                                              | reference                                        |
|---------|--------|--------------------------------------------------------------------------------------------------------------------------------------------------------------------------------------------------------------------|-------------------------------------------------------------------------------|--------------------------------------------------|
| G43026b | TrGC   | $\text{HYPROPO2H} + \text{OH} \rightarrow \text{CH}_3\text{COCH}_2\text{OH} + \text{OH}$                                                                                                                           | $(k_{\text{s*f\_soh*f\_pch2oh}} + k_{\text{t*f\_tooh*f\_pch2oh}})$            | Taraborrelli (2016)                              |
| G43027  | TrGCN  | $\text{PRONO3BO2} + \text{HO}_2 \rightarrow \text{PR2O2HNO3}$                                                                                                                                                      | $\text{KR02H02(3)}$                                                           | Rickard and Pascoe (2009)                        |
| G43028  | TrGCN  | $\text{PRONO3BO2} + \text{NO} \rightarrow \text{NOA} + \text{HO}_2 + \text{NO}_2$                                                                                                                                  | $\text{KR02N0}$                                                               | Rickard and Pascoe (2009)*                       |
| G43029  | TrGCN  | $\text{PRONO3BO2} + \text{NO}_3 \rightarrow \text{NOA} + \text{HO}_2 + \text{NO}_2$                                                                                                                                | $\text{KR02N03}$                                                              | Rickard and Pascoe (2009)                        |
| G43030a | TrGCN  | $\text{PR2O2HNO3} + \text{OH} \rightarrow \text{PRONO3BO2}$                                                                                                                                                        | $0.6 * k_{\text{CH300H\_OH}}$                                                 | Rickard and Pascoe (2009)                        |
| G43030b | TrGCN  | $\text{PR2O2HNO3} + \text{OH} \rightarrow \text{NOA} + \text{OH}$                                                                                                                                                  | $k_{\text{t*f\_tooh*f\_ch2ono2}}$                                             | Taraborrelli (2016)                              |
| G43031  | TrGCN  | $\text{MGLYOX} + \text{NO}_3 \rightarrow \text{CH}_3\text{C(O)} + \text{CO} + \text{HNO}_3$                                                                                                                        | $\text{KN03AL*2.4}$                                                           | Rickard and Pascoe (2009)                        |
| G43032  | TrGCN  | $\text{NOA} + \text{OH} \rightarrow \text{MGLYOX} + \text{NO}_2$                                                                                                                                                   | $(k_{\text{s*f\_co*f\_ono2}} + k_{\text{p*f\_co}})$                           | Taraborrelli (2016)                              |
| G43033  | TrGC   | $\text{HOCH2COCHO} + \text{OH} \rightarrow .8609 \text{ HOCH2CO} + .8609 \text{ CO} + .1391 \text{ HCOCOCHO} + .1391 \text{ HO}_2$                                                                                 | $(1.9\text{E-}12 * \text{EXP}(575./\text{temp}) + k_{\text{s*f\_soh*f\_co}})$ | Taraborrelli (2016)                              |
| G43034  | TrGCN  | $\text{HOCH2COCHO} + \text{NO}_3 \rightarrow \text{HOCH2CO} + \text{CO} + \text{HNO}_3$                                                                                                                            | $\text{KN03AL*2.4}$                                                           | Taraborrelli (2016)                              |
| G43035  | TrGC   | $\text{CH}_3\text{COCO}_2\text{H} + \text{OH} \rightarrow \text{CH}_3\text{C(O)} + \text{H}_2\text{O} + \text{CO}_2$                                                                                               | $4.9\text{E-}14 * \text{EXP}(276./\text{temp})$                               | Mellouki and Mu (2003),<br>Taraborrelli (2016)   |
| G43036  | TrGC   | $\text{HCOCOCH}_2\text{O}_2 \rightarrow .6 \text{ HCOCO} + .6 \text{ HCHO} + .2 \text{ HCOCOCHO} + .2 \text{ HOCH2COCHO}$                                                                                          | $k1\_R02p0R02$                                                                | Taraborrelli (2016)                              |
| G43037  | TrGCN  | $\text{HCOCOCH}_2\text{O}_2 + \text{NO} \rightarrow \text{HCOCO} + \text{HCHO} + \text{NO}_2$                                                                                                                      | $\text{KR02N0}$                                                               | Taraborrelli (2016)*                             |
| G43038a | TrGC   | $\text{HCOCOCH}_2\text{O}_2 + \text{HO}_2 \rightarrow \text{HCOCOCH}_2\text{OOH}$                                                                                                                                  | $\text{KR02H02(3)*rcoch2o2\_ooh}$                                             | Taraborrelli (2016)                              |
| G43038b | TrGC   | $\text{HCOCOCH}_2\text{O}_2 + \text{HO}_2 \rightarrow \text{HCOCO} + \text{HCHO} + \text{OH}$                                                                                                                      | $\text{KR02H02(3)*rcoch2o2\_oh}$                                              | Taraborrelli (2016)                              |
| G43039  | TrGCN  | $\text{HCOCOCH}_2\text{O}_2 + \text{NO}_3 \rightarrow \text{HCOCO} + \text{HCHO} + \text{NO}_2$                                                                                                                    | $\text{KR02N03}$                                                              | Taraborrelli (2016)                              |
| G43040a | TrGC   | $\text{HCOCOCH}_2\text{OOH} + \text{OH} \rightarrow \text{HOCH}_2\text{CO}_3 + \text{CO} + \text{H}_2\text{O}$                                                                                                     | $k_{\text{t*f\_co*f\_o}}$                                                     | Taraborrelli (2016)*                             |
| G43040b | TrGC   | $\text{HCOCOCH}_2\text{OOH} + \text{OH} \rightarrow \text{HCOCOCHO} + \text{H}_2\text{O} + \text{OH}$                                                                                                              | $k_{\text{s*f\_sooh*f\_co}}$                                                  | Taraborrelli (2016)*                             |
| G43040c | TrGC   | $\text{HCOCOCH}_2\text{OOH} + \text{OH} \rightarrow \text{HCOCOCH}_2\text{O}_2 + \text{H}_2\text{O}$                                                                                                               | $0.6 * k_{\text{CH300H\_OH}}$                                                 | Taraborrelli (2016)                              |
| G43041  | TrGCN  | $\text{HCOCOCH}_2\text{OOH} + \text{NO}_3 \rightarrow \text{HOCH}_2\text{CO}_3 + \text{CO} + \text{HNO}_3$                                                                                                         | $\text{KN03AL*2.4}$                                                           | Taraborrelli (2016)                              |
| G43042  | TrGC   | $\text{HOCH2COCH2O2} \rightarrow \text{HCHO} + \text{HOCH2CO}$                                                                                                                                                     | $k1\_R02p0R02$                                                                | Taraborrelli (2016)                              |
| G43043a | TrGC   | $\text{HOCH2COCH2O2} + \text{HO}_2 \rightarrow \text{HOCH2COCH2OOH}$                                                                                                                                               | $\text{KR02H02(3)*rcoch2o2\_ooh}$                                             | Taraborrelli (2016)                              |
| G43043b | TrGC   | $\text{HOCH2COCH2O2} + \text{HO}_2 \rightarrow \text{HCHO} + \text{HOCH2CO} + \text{OH}$                                                                                                                           | $\text{KR02H02(3)*rcoch2o2\_oh}$                                              | Taraborrelli (2016)                              |
| G43044  | TrGCN  | $\text{HOCH2COCH2O2} + \text{NO} \rightarrow \text{HCHO} + \text{HOCH2CO} + \text{NO}_2$                                                                                                                           | $\text{KR02N0}$                                                               | Taraborrelli (2016)*                             |
| G43045a | TrGC   | $\text{HOCH2COCH2OOH} + \text{OH} \rightarrow \text{HOCH2COCHO} + \text{OH}$                                                                                                                                       | $k_{\text{s*f\_sooh*f\_co}}$                                                  | Taraborrelli (2016)                              |
| G43045b | TrGC   | $\text{HOCH2COCH2OOH} + \text{OH} \rightarrow \text{HOCH2COCH2O2}$                                                                                                                                                 | $.6 * k_{\text{CH300H\_OH}}$                                                  | Taraborrelli (2016)                              |
| G43045c | TrGC   | $\text{HOCH2COCH2OOH} + \text{OH} \rightarrow \text{HCOCOCH}_2\text{OOH} + \text{HO}_2$                                                                                                                            | $1.60\text{E-}12 * \text{EXP}(305./\text{temp})$                              | Taraborrelli (2016)*                             |
| G43046  | TrGC   | $\text{CH3CHCO} + \text{OH} \rightarrow .72 \text{ CO} + .72 \text{ CH}_3\text{CHO} + .72 \text{ HO}_2 + .21 \text{ CH}_3\text{COCO}_2\text{H} + .07 \text{ CH}_3\text{CHO} + .07 \text{ HO}_2 + .07 \text{ CO}_2$ | $7.6\text{E-}11$                                                              | Hatakeyama et al. (1985),<br>Taraborrelli (2016) |
| G43047  | TrGCN  | $\text{PROPOLNO3} + \text{OH} \rightarrow \text{CH}_3\text{COCH}_2\text{OH} + \text{NO}_2$                                                                                                                         | $k_{\text{t*f\_ono2*f\_pch2oh}} + k_{\text{s*f\_soh*f\_ch2ono2}}$             | Taraborrelli (2016)                              |

Table 1: Gas phase reactions (... continued)

| #       | labels | reaction                                                                                                                   | rate coefficient                                                                                                                           | reference                                    |
|---------|--------|----------------------------------------------------------------------------------------------------------------------------|--------------------------------------------------------------------------------------------------------------------------------------------|----------------------------------------------|
| G43048  | TrGCN  | $\text{CH}_3\text{COCH}_2\text{O}_2 + \text{NO}_2 \rightarrow \text{CH}_3\text{COCH}_2\text{OONO}_2$                       | $2.3\text{E}-12 \cdot \text{EXP}(300./\text{temp})$                                                                                        | Tyndall et al. (2001a)*                      |
| G43049  | TrGCN  | $\text{CH}_3\text{COCH}_2\text{OONO}_2 \rightarrow \text{CH}_3\text{COCH}_2\text{O}_2 + \text{NO}_2$                       | $1.9\text{E}16 \cdot \text{EXP}(-10830./\text{temp})$                                                                                      | Sehested et al. (1998)*                      |
| G43050  | TrGCN  | $\text{CH}_3\text{COCH}_2\text{OONO}_2 + \text{OH} \rightarrow \text{MGLYOX} + \text{NO}_3 + \text{H}_2\text{O}$           | $9.50\text{E}-13 \cdot \text{EXP}(-650./\text{temp}) \cdot \text{f\_co}$                                                                   | Taraborrelli (2016)*                         |
| G43051a | TrGC   | $\text{C}_3\text{H}_7\text{OOH} + \text{OH} \rightarrow \text{C}_3\text{H}_7\text{O}_2 + \text{H}_2\text{O}$               | $0.6 \cdot \text{k\_CH300H\_OH}$                                                                                                           | Taraborrelli (2016)                          |
| G43051b | TrGC   | $\text{C}_3\text{H}_7\text{OOH} + \text{OH} \rightarrow \text{C}_2\text{H}_5\text{CHO} + \text{H}_2\text{O} + \text{OH}$   | $\text{k\_s*f\_sooh}$                                                                                                                      | Taraborrelli (2016)                          |
| G43051c | TrGC   | $\text{C}_3\text{H}_7\text{OOH} + \text{OH} \rightarrow \text{C}_2\text{H}_5\text{CHO} + \text{HO}_2 + \text{H}_2\text{O}$ | $\text{k\_s*f\_pch2oh}$                                                                                                                    | Taraborrelli (2016)*                         |
| G43052  | TrGC   | $\text{C}_2\text{H}_5\text{CHO} + \text{OH} \rightarrow \text{C}_2\text{H}_5\text{CO}_3 + \text{H}_2\text{O}$              | $4.9\text{E}-12 \cdot \text{EXP}(405./\text{temp})$                                                                                        | Atkinson et al. (2006)*                      |
| G43053  | TrGCN  | $\text{C}_2\text{H}_5\text{CHO} + \text{NO}_3 \rightarrow \text{C}_2\text{H}_5\text{CO}_3 + \text{HNO}_3$                  | $6.3\text{E}-15$                                                                                                                           | Atkinson et al. (2006)                       |
| G43054a | TrGC   | $\text{C}_2\text{H}_5\text{CO}_3 \rightarrow \text{C}_2\text{H}_5\text{O}_2 + \text{CO}_2$                                 | $\text{k1\_R02RC03} \cdot 0.9$                                                                                                             | Taraborrelli (2016)                          |
| G43054b | TrGC   | $\text{C}_2\text{H}_5\text{CO}_3 \rightarrow \text{C}_2\text{H}_5\text{CO}_2\text{H}$                                      | $\text{k1\_R02RC03} \cdot 0.1$                                                                                                             | Taraborrelli (2016)                          |
| G43055a | TrGC   | $\text{C}_2\text{H}_5\text{CO}_3 + \text{HO}_2 \rightarrow \text{C}_2\text{H}_5\text{O}_2 + \text{CO}_2 + \text{OH}$       | $\text{KAPH02} \cdot \text{rco3\_oh}$                                                                                                      | Taraborrelli (2016), Groß et al. (2014)      |
| G43055b | TrGC   | $\text{C}_2\text{H}_5\text{CO}_3 + \text{HO}_2 \rightarrow \text{C}_2\text{H}_5\text{CO}_3\text{H}$                        | $\text{KAPH02} \cdot \text{rco3\_ooh}$                                                                                                     | Taraborrelli (2016), Groß et al. (2014)      |
| G43055c | TrGC   | $\text{C}_2\text{H}_5\text{CO}_3 + \text{HO}_2 \rightarrow \text{C}_2\text{H}_5\text{CO}_2\text{H} + \text{O}_3$           | $\text{KAPH02} \cdot \text{rco3\_o3}$                                                                                                      | Taraborrelli (2016), Groß et al. (2014)      |
| G43056  | TrGCN  | $\text{C}_2\text{H}_5\text{CO}_3 + \text{NO} \rightarrow \text{NO}_2 + \text{C}_2\text{H}_5\text{O}_2 + \text{CO}_2$       | KAPNO                                                                                                                                      | Rickard and Pascoe (2009)                    |
| G43057  | TrGCN  | $\text{C}_2\text{H}_5\text{CO}_3 + \text{NO}_2 \rightarrow \text{PPN}$                                                     | $\text{k\_CH3C03\_N02}$                                                                                                                    | Rickard and Pascoe (2009)                    |
| G43058  | TrGCN  | $\text{PPN} \rightarrow \text{C}_2\text{H}_5\text{CO}_3 + \text{NO}_2$                                                     | $\text{k\_PAN\_M}$                                                                                                                         | Rickard and Pascoe (2009)                    |
| G43059  | TrGC   | $\text{C}_2\text{H}_5\text{CO}_2\text{H} + \text{OH} \rightarrow \text{CH}_3\text{CHO} + \text{CO}_2 + \text{H}_2\text{O}$ | $\text{k\_co2h} + \text{k\_p} + \text{k\_s*f\_co2h}$                                                                                       | Taraborrelli (2016)*                         |
| G43060a | TrGC   | $\text{C}_2\text{H}_5\text{CO}_3\text{H} + \text{OH} \rightarrow \text{C}_2\text{H}_5\text{CO}_3 + \text{H}_2\text{O}$     | $0.6 \cdot \text{k\_CH300H\_OH}$                                                                                                           | Taraborrelli (2016)                          |
| G43060b | TrGC   | $\text{C}_2\text{H}_5\text{CO}_3\text{H} + \text{OH} \rightarrow \text{CH}_3\text{CHO} + \text{CO}_2 + \text{H}_2\text{O}$ | $\text{k\_s*f\_co2h} + \text{k\_p}$                                                                                                        | Taraborrelli (2016)*                         |
| G43061  | TrGCN  | $\text{PPN} + \text{OH} \rightarrow \text{CH}_3\text{CHO} + \text{CO}_2 + \text{NO}_2 + \text{H}_2\text{O}$                | $\text{k\_s*f\_cpan} + \text{k\_p}$                                                                                                        | Taraborrelli (2016)*                         |
| G43062  | TrGC   | $\text{CH}_3\text{COCO}_3\text{H} + \text{OH} \rightarrow \text{CH}_3\text{COCO}_3 + \text{H}_2\text{O}$                   | $0.6 \cdot \text{k\_CH300H\_OH}$                                                                                                           | Taraborrelli (2016)                          |
| G43063a | TrGC   | $\text{CH}_3\text{COCO}_3 + \text{HO}_2 \rightarrow \text{CH}_3\text{C(O)} + \text{CO}_2 + \text{OH}$                      | $\text{KAPH02} \cdot \text{rco3\_oh}$                                                                                                      | Taraborrelli (2016)                          |
| G43063b | TrGC   | $\text{CH}_3\text{COCO}_3 + \text{HO}_2 \rightarrow \text{CH}_3\text{COCO}_3\text{H}$                                      | $\text{KAPH02} \cdot (\text{rco3\_ooh} + \text{rco3\_o3})$                                                                                 | Taraborrelli (2016)                          |
| G43064  | TrGCN  | $\text{CH}_3\text{COCO}_3 + \text{NO} \rightarrow \text{CH}_3\text{C(O)} + \text{CO}_2 + \text{NO}_2$                      | KAPNO                                                                                                                                      | Taraborrelli (2016)                          |
| G43065  | TrGCN  | $\text{CH}_3\text{COCO}_3 + \text{NO}_2 \rightarrow \text{CH}_3\text{C(O)} + \text{CO}_2 + \text{NO}_3$                    | $\text{k\_CH3C03\_N02}$                                                                                                                    | Taraborrelli (2016)*                         |
| G43066  | TrGCN  | $\text{CH}_3\text{COCO}_3 + \text{NO}_3 \rightarrow \text{CH}_3\text{C(O)OO} + \text{CO}_2 + \text{NO}_2$                  | $\text{KR02N03} \cdot 1.74$                                                                                                                | Taraborrelli (2016)                          |
| G43067  | TrGC   | $\text{CH}_3\text{COCO}_3 \rightarrow \text{CH}_3\text{C(O)OO} + \text{CO}_2$                                              | $\text{k1\_R02RC03}$                                                                                                                       | Taraborrelli (2016)                          |
| G43068  | TrGC   | $\text{HCOCOCHO} + \text{OH} \rightarrow 3 \text{ CO} + \text{HO}_2$                                                       | $2 \cdot \text{k\_t*f\_co*f\_o}$                                                                                                           | Taraborrelli (2016)                          |
| G43069  | TrGC   | $\text{IPROPOL} + \text{OH} \rightarrow \text{CH}_3\text{COCH}_3 + \text{HO}_2 + \text{H}_2\text{O}$                       | $2.6\text{E}-12 \cdot \text{EXP}(200./\text{temp})$                                                                                        | Atkinson et al. (2006)                       |
| G43070a | TrGC   | $\text{NPROPOL} + \text{OH} \rightarrow \text{C}_2\text{H}_5\text{CHO} + \text{HO}_2 + \text{H}_2\text{O}$                 | $4.6\text{E}-12 \cdot \text{EXP}(70./\text{temp}) \cdot (\text{k\_s*f\_soh} / (\text{k\_p} + \text{k\_s*f\_pch2oh} + \text{k\_s*f\_soh}))$ | Atkinson et al. (2006), Taraborrelli (2016)* |

Table 1: Gas phase reactions (... continued)

| #       | labels   | reaction                                                                                                                   | rate coefficient                                                                                                                                 | reference                                    |
|---------|----------|----------------------------------------------------------------------------------------------------------------------------|--------------------------------------------------------------------------------------------------------------------------------------------------|----------------------------------------------|
| G43070b | TrGC     | $\text{NPROPOL} + \text{OH} \rightarrow \text{HYPROPO2} + \text{H}_2\text{O}$                                              | $4.6\text{E}-12 \cdot \text{EXP}(70./\text{temp}) \cdot ((k_p + k_{\text{s*f\_pch2oh}}) / (k_p + k_{\text{s*f\_pch2oh}} + k_{\text{s*f\_soh}}))$ | Atkinson et al. (2006), Taraborrelli (2016)* |
| G43071a | TrGC     | $\text{CH}_2\text{CHCH}_2\text{OH} + \text{OH} \rightarrow \text{HCOOH} + \text{OH} + \text{CH}_3\text{CHO}$               | $k_{\text{CH2CHOH\_OH\_HCOOH}}$                                                                                                                  | Taraborrelli (2016), So et al. (2014)*       |
| G43072  | TrGC     | $\text{CH}_2\text{CHCH}_2\text{OH} + \text{HCOOH} \rightarrow \text{C}_2\text{H}_5\text{CHO} + \text{HCOOH}$               | $k_{\text{CH2CHOH\_HCOOH}}$                                                                                                                      | Taraborrelli (2016), daSilva (2010)*         |
| G43073  | TrGC     | $\text{C}_2\text{H}_5\text{CHO} + \text{HCOOH} \rightarrow \text{CH}_2\text{CHCH}_2\text{OH} + \text{HCOOH}$               | $k_{\text{ALD\_HCOOH}}$                                                                                                                          | Taraborrelli (2016), daSilva (2010)*         |
| G43074  | TrGC     | $\text{HCOCOCH}_2\text{OOH} + \text{OH} \rightarrow \text{HCOCO} + \text{CO} + \text{HO}_2 + \text{OH}$                    | $k_{\text{s*f\_sooh*f\_co} + .6 \cdot k_{\text{CH3OOH\_OH}}}$                                                                                    | Taraborrelli (2016)*                         |
| G43202  | TrGTerC  | $\text{HCOCH}_2\text{CHO} + \text{OH} \rightarrow \text{HCOCH}_2\text{CO}_3$                                               | $4.29\text{E}-11$                                                                                                                                | Rickard and Pascoe (2009)                    |
| G43203  | TrGTerCN | $\text{HCOCH}_2\text{CHO} + \text{NO}_3 \rightarrow \text{HCOCH}_2\text{CO}_3 + \text{HNO}_3$                              | $2 \cdot \text{KN03AL} \cdot 2.4$                                                                                                                | Rickard and Pascoe (2009)                    |
| G43204a | TrGTerC  | $\text{HCOCH}_2\text{CO}_3 \rightarrow \text{HCOCH}_2\text{O}_2 + \text{CO}_2$                                             | $k1_{\text{R02RC03}} \cdot 0.9$                                                                                                                  | Taraborrelli (2016)                          |
| G43204b | TrGTerC  | $\text{HCOCH}_2\text{CO}_3 \rightarrow \text{HCOCH}_2\text{CO}_2\text{H}$                                                  | $k1_{\text{R02RC03}} \cdot 0.1$                                                                                                                  | Taraborrelli (2016)                          |
| G43205  | TrGTerCN | $\text{HCOCH}_2\text{CO}_3 + \text{NO} \rightarrow \text{HCOCH}_2\text{O}_2 + \text{CO}_2 + \text{NO}_2$                   | KAPNO                                                                                                                                            | Rickard and Pascoe (2009)                    |
| G43206  | TrGTerCN | $\text{HCOCH}_2\text{CO}_3 + \text{NO}_2 \rightarrow \text{C}_3\text{PAN2}$                                                | $k_{\text{CH3CO3\_NO2}}$                                                                                                                         | Rickard and Pascoe (2009)                    |
| G43207a | TrGTerC  | $\text{HCOCH}_2\text{CO}_3 + \text{HO}_2 \rightarrow \text{HCOCH}_2\text{CO}_3\text{H}$                                    | $\text{KAPH02} \cdot \text{rco3\_ooh}$                                                                                                           | Rickard and Pascoe (2009)                    |
| G43207b | TrGTerC  | $\text{HCOCH}_2\text{CO}_3 + \text{HO}_2 \rightarrow \text{HCOCH}_2\text{CO}_2\text{H} + \text{O}_3$                       | $\text{KAPH02} \cdot \text{rco3\_o3}$                                                                                                            | Rickard and Pascoe (2009)                    |
| G43207c | TrGTerC  | $\text{HCOCH}_2\text{CO}_3 + \text{HO}_2 \rightarrow \text{HCOCH}_2\text{O}_2 + \text{CO}_2 + \text{OH}$                   | $\text{KAPH02} \cdot \text{rco3\_oh}$                                                                                                            | Rickard and Pascoe (2009)                    |
| G43210  | TrGTerCN | $\text{C}_3\text{PAN2} \rightarrow \text{HCOCH}_2\text{CO}_3 + \text{NO}_2$                                                | $k_{\text{PAN\_M}}$                                                                                                                              | Rickard and Pascoe (2009)                    |
| G43211  | TrGTerCN | $\text{C}_3\text{PAN2} + \text{OH} \rightarrow \text{GLYOX} + \text{CO} + \text{NO}_2$                                     | $2.10\text{E}-11$                                                                                                                                | Rickard and Pascoe (2009)                    |
| G43212  | TrGTerC  | $\text{HCOCH}_2\text{CO}_2\text{H} + \text{OH} \rightarrow \text{HCOCH}_2\text{O}_2 + \text{CO}_2$                         | $2.14\text{E}-11$                                                                                                                                | Rickard and Pascoe (2009)                    |
| G43213a | TrGTerC  | $\text{HOC}_2\text{H}_4\text{CO}_3 \rightarrow \text{HOCH}_2\text{CH}_2\text{O}_2 + \text{CO}_2$                           | $k1_{\text{R02RC03}} \cdot 0.9$                                                                                                                  | Taraborrelli (2016)                          |
| G43213b | TrGTerC  | $\text{HOC}_2\text{H}_4\text{CO}_3 \rightarrow \text{HOC}_2\text{H}_4\text{CO}_2\text{H}$                                  | $k1_{\text{R02RC03}} \cdot 0.1$                                                                                                                  | Taraborrelli (2016)                          |
| G43214  | TrGTerCN | $\text{HOC}_2\text{H}_4\text{CO}_3 + \text{NO} \rightarrow \text{HOCH}_2\text{CH}_2\text{O}_2 + \text{CO}_2 + \text{NO}_2$ | KAPNO                                                                                                                                            | Rickard and Pascoe (2009)                    |
| G43215a | TrGTerC  | $\text{HOC}_2\text{H}_4\text{CO}_3 + \text{HO}_2 \rightarrow \text{HOC}_2\text{H}_4\text{CO}_3\text{H}$                    | $\text{KAPH02} \cdot \text{rco3\_ooh}$                                                                                                           | Rickard and Pascoe (2009)                    |
| G43215b | TrGTerC  | $\text{HOC}_2\text{H}_4\text{CO}_3 + \text{HO}_2 \rightarrow \text{HOCH}_2\text{CH}_2\text{O}_2 + \text{CO}_2 + \text{OH}$ | $\text{KAPH02} \cdot \text{rco3\_oh}$                                                                                                            | Rickard and Pascoe (2009)                    |
| G43215c | TrGTerC  | $\text{HOC}_2\text{H}_4\text{CO}_3 + \text{HO}_2 \rightarrow \text{HOC}_2\text{H}_4\text{CO}_2\text{H} + \text{O}_3$       | $\text{KAPH02} \cdot \text{rco3\_o3}$                                                                                                            | Rickard and Pascoe (2009)                    |
| G43218  | TrGTerCN | $\text{HOC}_2\text{H}_4\text{CO}_3 + \text{NO}_2 \rightarrow \text{C}_3\text{PAN1}$                                        | $k_{\text{CH3CO3\_NO2}}$                                                                                                                         | Rickard and Pascoe (2009)                    |
| G43219  | TrGTerC  | $\text{HOC}_2\text{H}_4\text{CO}_2\text{H} + \text{OH} \rightarrow \text{HOCH}_2\text{CH}_2\text{O}_2 + \text{CO}_2$       | $1.39\text{E}-11$                                                                                                                                | Rickard and Pascoe (2009)                    |
| G43220  | TrGTerC  | $\text{HOC}_2\text{H}_4\text{CO}_3\text{H} + \text{OH} \rightarrow \text{HOC}_2\text{H}_4\text{CO}_3$                      | $1.73\text{E}-11$                                                                                                                                | Rickard and Pascoe (2009)                    |
| G43221  | TrGTerCN | $\text{C}_3\text{PAN1} \rightarrow \text{HOC}_2\text{H}_4\text{CO}_3 + \text{NO}_2$                                        | $k_{\text{PAN\_M}}$                                                                                                                              | Rickard and Pascoe (2009)                    |
| G43222  | TrGTerCN | $\text{C}_3\text{PAN1} + \text{OH} \rightarrow \text{HOCH}_2\text{CHO} + \text{CO} + \text{NO}_2$                          | $4.51\text{E}-12$                                                                                                                                | Rickard and Pascoe (2009)                    |
| G43223  | TrGTerC  | $\text{HCOCH}_2\text{CO}_3\text{H} + \text{OH} \rightarrow \text{HCOCH}_2\text{O}_2 + \text{CO}_2 + \text{H}_2\text{O}$    | $2.49\text{E}-11$                                                                                                                                | Rickard and Pascoe (2009)*                   |
| G43415  | TrGAroC  | $\text{C3DIALOOH} + \text{OH} \rightarrow \text{HCOCOCHO} + \text{OH}$                                                     | $1.44\text{E}-10$                                                                                                                                | Rickard and Pascoe (2009)                    |

Table 1: Gas phase reactions (... continued)

| #       | labels   | reaction                                                                                                                                                                            | rate coefficient                                                                                                                                                               | reference                                       |
|---------|----------|-------------------------------------------------------------------------------------------------------------------------------------------------------------------------------------|--------------------------------------------------------------------------------------------------------------------------------------------------------------------------------|-------------------------------------------------|
| G43418a | TrGAroC  | $\text{C3DIALO2} + \text{HO}_2 \rightarrow \text{C3DIALOOH}$                                                                                                                        | $\text{KR02H02(3)} * (\text{rco3\_ooh} + \text{rco3\_o3})$                                                                                                                     | Rickard and Pascoe (2009)                       |
| G43418b | TrGAroC  | $\text{C3DIALO2} + \text{HO}_2 \rightarrow \text{GLYOX} + \text{CO} + \text{HO}_2 + \text{OH}$                                                                                      | $\text{KR02H02(3)} * \text{rco3\_oh}$                                                                                                                                          | Rickard and Pascoe (2009)                       |
| G43419  | TrGAroCN | $\text{C3DIALO2} + \text{NO} \rightarrow \text{GLYOX} + \text{CO} + \text{HO}_2 + \text{NO}_2$                                                                                      | KR02N0                                                                                                                                                                         | Rickard and Pascoe (2009)*                      |
| G43420  | TrGAroCN | $\text{C3DIALO2} + \text{NO}_3 \rightarrow \text{GLYOX} + \text{CO} + \text{HO}_2 + \text{NO}_2$                                                                                    | KR02N03                                                                                                                                                                        | Rickard and Pascoe (2009)*                      |
| G43421  | TrGAroC  | $\text{C3DIALO2} \rightarrow \text{GLYOX} + \text{CO} + \text{HO}_2$                                                                                                                | k1_R02s0R02                                                                                                                                                                    | Rickard and Pascoe (2009)*                      |
| G43422a | TrGAroC  | $\text{HCOCOHCO3} + \text{HO}_2 \rightarrow \text{GLYOX} + \text{CO}_2 + \text{HO}_2 + \text{OH}$                                                                                   | KAPH02*rco3_oh                                                                                                                                                                 | Rickard and Pascoe (2009)                       |
| G43422b | TrGAroC  | $\text{HCOCOHCO3} + \text{HO}_2 \rightarrow \text{HCOCOHCO3H}$                                                                                                                      | KAPH02*(rco3_ooh+rco3_o3)                                                                                                                                                      | Rickard and Pascoe (2009)                       |
| G43424  | TrGAroCN | $\text{HCOCOHCO3} + \text{NO} \rightarrow \text{GLYOX} + \text{CO}_2 + \text{HO}_2 + \text{NO}_2$                                                                                   | KAPN0                                                                                                                                                                          | Rickard and Pascoe (2009)                       |
| G43425  | TrGAroCN | $\text{HCOCOHCO3} + \text{NO}_2 \rightarrow \text{HCOCOHHPAN}$                                                                                                                      | k_CH3CO3_N02                                                                                                                                                                   | Rickard and Pascoe (2009)                       |
| G43426  | TrGAroCN | $\text{HCOCOHCO3} + \text{NO}_3 \rightarrow \text{GLYOX} + \text{CO}_2 + \text{HO}_2 + \text{NO}_2$                                                                                 | KR02N03*1.74                                                                                                                                                                   | Rickard and Pascoe (2009)                       |
| G43427  | TrGAroC  | $\text{HCOCOHCO3} \rightarrow \text{GLYOX} + \text{CO}_2 + \text{HO}_2$                                                                                                             | k1_R02RC03                                                                                                                                                                     | Rickard and Pascoe (2009)                       |
| G43428  | TrGAroC  | $\text{METACETHO} + \text{OH} \rightarrow \text{CH}_3\text{C(O)} + \text{CO}_2$                                                                                                     | 9.82E-11                                                                                                                                                                       | Rickard and Pascoe (2009)                       |
| G43442  | TrGAroCN | $\text{HCOCOHHPAN} + \text{OH} \rightarrow \text{GLYOX} + \text{CO} + \text{NO}_2$                                                                                                  | 6.97E-11                                                                                                                                                                       | Rickard and Pascoe (2009)                       |
| G43443  | TrGAroCN | $\text{HCOCOHHPAN} \rightarrow \text{HCOCOHCO3} + \text{NO}_2$                                                                                                                      | k_PAN_M                                                                                                                                                                        | Rickard and Pascoe (2009)                       |
| G43444  | TrGAroC  | $\text{C32OH13CO} + \text{OH} \rightarrow \text{HCOCOHCO3}$                                                                                                                         | 1.36E-10                                                                                                                                                                       | Rickard and Pascoe (2009)                       |
| G43446  | TrGAroC  | $\text{HCOCOHCO3H} + \text{OH} \rightarrow \text{HCOCOHCO3}$                                                                                                                        | 7.33E-11                                                                                                                                                                       | Rickard and Pascoe (2009)                       |
| G44000  | TrGC     | $\text{C}_4\text{H}_{10} + \text{OH} \rightarrow \text{LC}_4\text{H}_9\text{O}_2 + \text{H}_2\text{O}$                                                                              | $2.03\text{E-}17 * \text{temp} * \text{temp} * \text{EXP}(78./\text{temp})$                                                                                                    | Atkinson et al. (2006)*                         |
| G44001a | TrGC     | $\text{LC}_4\text{H}_9\text{O}_2 \rightarrow \text{C}_3\text{H}_7\text{CHO} + \text{HO}_2$                                                                                          | $(\text{k1\_R02pR02} * 0.1273 + \text{k1\_R02sR02} * 0.8727) * 0.1273$                                                                                                         | Rickard and Pascoe (2009), Taraborrelli (2016)  |
| G44001b | TrGC     | $\text{LC}_4\text{H}_9\text{O}_2 \rightarrow .636 \text{ MEK} + .636 \text{ HO}_2 + .364 \text{ CH}_3\text{CHO} + .364 \text{ C}_2\text{H}_5\text{O}_2$                             | $(\text{k1\_R02pR02} * 0.1273 + \text{k1\_R02sR02} * 0.8727) * 0.8727$                                                                                                         | Rickard and Pascoe (2009), Taraborrelli (2016)* |
| G44002  | TrGC     | $\text{LC}_4\text{H}_9\text{O}_2 + \text{HO}_2 \rightarrow \text{LC}_4\text{H}_9\text{OOH}$                                                                                         | KR02H02(4)                                                                                                                                                                     | Rickard and Pascoe (2009)                       |
| G44003a | TrGCN    | $\text{LC}_4\text{H}_9\text{O}_2 + \text{NO} \rightarrow \text{NO}_2 + \text{C}_3\text{H}_7\text{CHO} + \text{HO}_2$                                                                | $\text{KR02N0} * (1 - (0.1273 * \alpha_{\text{AN}}(4, 1, 0, 0, 0, \text{temp}, \text{cair}) + 0.8727 * \alpha_{\text{AN}}(4, 2, 0, 0, 0, \text{temp}, \text{cair}))) * 0.1273$ | Rickard and Pascoe (2009), Taraborrelli (2016)  |
| G44003b | TrGCN    | $\text{LC}_4\text{H}_9\text{O}_2 + \text{NO} \rightarrow \text{NO}_2 + .636 \text{ MEK} + .636 \text{ HO}_2 + .364 \text{ CH}_3\text{CHO} + .364 \text{ C}_2\text{H}_5\text{O}_2$   | $\text{KR02N0} * (1 - (0.1273 * \alpha_{\text{AN}}(4, 1, 0, 0, 0, \text{temp}, \text{cair}) + 0.8727 * \alpha_{\text{AN}}(4, 2, 0, 0, 0, \text{temp}, \text{cair}))) * 0.8727$ | Rickard and Pascoe (2009), Taraborrelli (2016)  |
| G44003c | TrGCN    | $\text{LC}_4\text{H}_9\text{O}_2 + \text{NO} \rightarrow \text{LC}_4\text{H}_9\text{NO3}$                                                                                           | $\text{KR02N0} * (0.1273 * \alpha_{\text{AN}}(4, 1, 0, 0, 0, \text{temp}, \text{cair}) + 0.8727 * \alpha_{\text{AN}}(4, 2, 0, 0, 0, \text{temp}, \text{cair}))$                | Rickard and Pascoe (2009)*                      |
| G44004a | TrGCN    | $\text{LC}_4\text{H}_9\text{O}_2 + \text{NO}_3 \rightarrow \text{NO}_2 + \text{C}_3\text{H}_7\text{CHO} + \text{HO}_2$                                                              | KR02N03*0.1273                                                                                                                                                                 | Rickard and Pascoe (2009), Taraborrelli (2016)  |
| G44004b | TrGCN    | $\text{LC}_4\text{H}_9\text{O}_2 + \text{NO}_3 \rightarrow \text{NO}_2 + .636 \text{ MEK} + .636 \text{ HO}_2 + .364 \text{ CH}_3\text{CHO} + .364 \text{ C}_2\text{H}_5\text{O}_2$ | KR02N03*0.8727                                                                                                                                                                 | Rickard and Pascoe (2009), Taraborrelli (2016)  |

Table 1: Gas phase reactions (... continued)

| #       | labels | reaction                                                                                                                                                                                                                                                                                                                                                                                                                                                     | rate coefficient                                                                                                                                                                                                     | reference                                         |
|---------|--------|--------------------------------------------------------------------------------------------------------------------------------------------------------------------------------------------------------------------------------------------------------------------------------------------------------------------------------------------------------------------------------------------------------------------------------------------------------------|----------------------------------------------------------------------------------------------------------------------------------------------------------------------------------------------------------------------|---------------------------------------------------|
| G44005a | TrGC   | $\text{LC}_4\text{H}_9\text{OOH} + \text{OH} \rightarrow \text{LC}_4\text{H}_9\text{O}_2 + \text{H}_2\text{O}$                                                                                                                                                                                                                                                                                                                                               | $0.6 \cdot k_{\text{CH300H\_OH}}$                                                                                                                                                                                    | Taraborrelli (2016)                               |
| G44005b | TrGC   | $\text{LC}_4\text{H}_9\text{OOH} + \text{OH} \rightarrow \text{C}_3\text{H}_7\text{CHO} + \text{H}_2\text{O} + \text{OH}$                                                                                                                                                                                                                                                                                                                                    | $k_{\text{s}} \cdot f_{\text{tooh}} \cdot f_{\text{alk}} \cdot (k_{\text{p}} / (k_{\text{p}} + k_{\text{s}}))$                                                                                                       | Taraborrelli (2016)                               |
| G44005c | TrGC   | $\text{LC}_4\text{H}_9\text{OOH} + \text{OH} \rightarrow \text{MEK} + \text{H}_2\text{O} + \text{OH}$                                                                                                                                                                                                                                                                                                                                                        | $k_{\text{t}} \cdot f_{\text{tooh}} \cdot f_{\text{alk}} \cdot (k_{\text{s}} / (k_{\text{p}} + k_{\text{s}}))$                                                                                                       | Taraborrelli (2016)                               |
| G44006a | TrGC   | $\text{iC}_4\text{H}_{10} + \text{OH} \rightarrow \text{TC}_4\text{H}_9\text{O}_2 + \text{H}_2\text{O}$                                                                                                                                                                                                                                                                                                                                                      | $1.17\text{E-}17 \cdot \text{temp} \cdot \text{temp} \cdot \text{EXP}(213./\text{temp})$                                                                                                                             | Atkinson (2003)                                   |
| G44006b | TrGC   | $\text{iC}_4\text{H}_{10} + \text{OH} \rightarrow \text{IC}_4\text{H}_9\text{O}_2 + \text{H}_2\text{O}$                                                                                                                                                                                                                                                                                                                                                      | $k_{\text{t}} / (3 \cdot k_{\text{p}} + k_{\text{t}})$<br>$1.17\text{E-}17 \cdot \text{temp} \cdot \text{temp} \cdot \text{EXP}(213./\text{temp})$<br>$3 \cdot k_{\text{p}} / (3 \cdot k_{\text{p}} + k_{\text{t}})$ | Atkinson (2003)                                   |
| G44007  | TrGC   | $\text{TC}_4\text{H}_9\text{O}_2 \rightarrow \text{CH}_3\text{COCH}_3 + \text{CH}_3$                                                                                                                                                                                                                                                                                                                                                                         | $k1_{\text{R02tR02}}$                                                                                                                                                                                                | Rickard and Pascoe (2009),<br>Taraborrelli (2016) |
| G44008  | TrGC   | $\text{TC}_4\text{H}_9\text{O}_2 + \text{HO}_2 \rightarrow \text{TC}_4\text{H}_9\text{OOH}$                                                                                                                                                                                                                                                                                                                                                                  | $\text{KR02H02}(4)$                                                                                                                                                                                                  | Rickard and Pascoe (2009)                         |
| G44009a | TrGCN  | $\text{TC}_4\text{H}_9\text{O}_2 + \text{NO} \rightarrow \text{NO}_2 + \text{CH}_3\text{COCH}_3 + \text{CH}_3$                                                                                                                                                                                                                                                                                                                                               | $\text{KR02N0} \cdot (1 - \alpha_{\text{AN}}(4, 3, 0, 0, 0, \text{temp}, \text{cair}))$                                                                                                                              | Rickard and Pascoe (2009),<br>Taraborrelli (2016) |
| G44009b | TrGCN  | $\text{TC}_4\text{H}_9\text{O}_2 + \text{NO} \rightarrow \text{TC4H9NO3}$                                                                                                                                                                                                                                                                                                                                                                                    | $\text{KR02N0} \cdot \alpha_{\text{AN}}(4, 3, 0, 0, 0, \text{temp}, \text{cair})$                                                                                                                                    | Rickard and Pascoe (2009)                         |
| G44010a | TrGC   | $\text{TC}_4\text{H}_9\text{OOH} + \text{OH} \rightarrow \text{TC}_4\text{H}_9\text{O}_2 + \text{H}_2\text{O}$                                                                                                                                                                                                                                                                                                                                               | $0.6 \cdot k_{\text{CH300H\_OH}}$                                                                                                                                                                                    | Taraborrelli (2016)                               |
| G44010b | TrGC   | $\text{TC}_4\text{H}_9\text{OOH} + \text{OH} \rightarrow \text{CH}_3\text{COCH}_3 + \text{HCHO} + \text{OH} + \text{H}_2\text{O}$                                                                                                                                                                                                                                                                                                                            | $3 \cdot k_{\text{p}} \cdot f_{\text{tch2oh}}$                                                                                                                                                                       | Taraborrelli (2016)*                              |
| G44011  | TrGCN  | $\text{TC4H9NO3} + \text{OH} \rightarrow \text{CH}_3\text{COCH}_3 + \text{HCHO} + \text{NO}_2 + \text{H}_2\text{O}$                                                                                                                                                                                                                                                                                                                                          | $3 \cdot k_{\text{p}} \cdot f_{\text{ch2ono2}}$                                                                                                                                                                      | Taraborrelli (2016)*                              |
| G44012  | TrGC   | $\text{IC}_4\text{H}_9\text{O}_2 \rightarrow \text{IPRCHO}$                                                                                                                                                                                                                                                                                                                                                                                                  | $k1_{\text{R02sR02}}$                                                                                                                                                                                                | Rickard and Pascoe (2009),<br>Taraborrelli (2016) |
| G44013  | TrGC   | $\text{IC}_4\text{H}_9\text{O}_2 + \text{HO}_2 \rightarrow \text{IC}_4\text{H}_9\text{OOH}$                                                                                                                                                                                                                                                                                                                                                                  | $\text{KR02H02}(4)$                                                                                                                                                                                                  | Rickard and Pascoe (2009)                         |
| G44014a | TrGCN  | $\text{IC}_4\text{H}_9\text{O}_2 + \text{NO} \rightarrow \text{NO}_2 + \text{IPRCHO}$                                                                                                                                                                                                                                                                                                                                                                        | $\text{KR02N0} \cdot (1 - \alpha_{\text{AN}}(4, 2, 0, 0, 0, \text{temp}, \text{cair}))$                                                                                                                              | Rickard and Pascoe (2009),<br>Taraborrelli (2016) |
| G44014b | TrGCN  | $\text{IC}_4\text{H}_9\text{O}_2 + \text{NO} \rightarrow \text{IC4H9NO3}$                                                                                                                                                                                                                                                                                                                                                                                    | $\text{KR02N0} \cdot \alpha_{\text{AN}}(4, 2, 0, 0, 0, \text{temp}, \text{cair})$                                                                                                                                    | Rickard and Pascoe (2009)                         |
| G44015a | TrGC   | $\text{IC}_4\text{H}_9\text{OOH} + \text{OH} \rightarrow \text{IC}_4\text{H}_9\text{O}_2 + \text{H}_2\text{O}$                                                                                                                                                                                                                                                                                                                                               | $0.6 \cdot k_{\text{CH300H\_OH}}$                                                                                                                                                                                    | Taraborrelli (2016)                               |
| G44015b | TrGC   | $\text{IC}_4\text{H}_9\text{OOH} + \text{OH} \rightarrow \text{IPRCHO} + \text{OH} + \text{H}_2\text{O}$                                                                                                                                                                                                                                                                                                                                                     | $k_{\text{s}} \cdot f_{\text{sooh}} + 2 \cdot k_{\text{s}} + k_{\text{t}} \cdot f_{\text{pch2oh}}$                                                                                                                   | Taraborrelli (2016)*                              |
| G44016  | TrGCN  | $\text{IC4H9NO3} + \text{OH} \rightarrow \text{IPRCHO} + \text{NO}_2 + \text{H}_2\text{O}$                                                                                                                                                                                                                                                                                                                                                                   | $k_{\text{s}} \cdot f_{\text{ono2}} + 2 \cdot k_{\text{p}} + k_{\text{t}} \cdot f_{\text{ch2ono2}}$                                                                                                                  | Taraborrelli (2016)*                              |
| G44017  | TrGC   | $\text{MVK} + \text{O}_3 \rightarrow .87 \text{ MGLYOX} + .5481 \text{ CO} + .1392 \text{ HO}_2$<br>$+ .1392 \text{ OH} + .3219 \text{ CH}_2\text{OO} + .13 \text{ HCHO} + .04680 \text{ OH}$<br>$+ .04680 \text{ CO} + .07280 \text{ CH}_3\text{C(O)} + .026 \text{ CH}_3\text{CHO} + .026$<br>$\text{CO}_2 + .026 \text{ HCHO} + .026 \text{ HO}_2 + .02402 \text{ MGLYOX} +$<br>$.02402 \text{ H}_2\text{O}_2 + .00718 \text{ CH}_3\text{COCO}_2\text{H}$ | $8.5\text{E-}16 \cdot \text{EXP}(-1520./\text{temp})$                                                                                                                                                                | Taraborrelli (2016)                               |
| G44018  | TrGC   | $\text{MVK} + \text{OH} \rightarrow \text{LHMVKABO2}$                                                                                                                                                                                                                                                                                                                                                                                                        | $2.6\text{E-}12 \cdot \text{EXP}(610./\text{temp})$                                                                                                                                                                  | Taraborrelli (2016), Atkinson<br>et al. (2006)*   |

Table 1: Gas phase reactions (... continued)

| #       | labels | reaction                                                                                                                                                                                                                     | rate coefficient                                                                 | reference                                    |
|---------|--------|------------------------------------------------------------------------------------------------------------------------------------------------------------------------------------------------------------------------------|----------------------------------------------------------------------------------|----------------------------------------------|
| G44019  | TrGC   | MEK + OH $\rightarrow$ LMEKO2 + H <sub>2</sub> O                                                                                                                                                                             | 1.5E-12*EXP(-90./temp)                                                           | Atkinson et al. (2006), Taraborrelli (2016)* |
| G44020  | TrGC   | LMEKO2 + HO <sub>2</sub> $\rightarrow$ LMEKOOH                                                                                                                                                                               | KR02H02(4)                                                                       | Taraborrelli (2016)                          |
| G44021a | TrGCN  | LMEKO2 + NO $\rightarrow$ .62 CH <sub>3</sub> CHO + .62 CH <sub>3</sub> C(O) + .38 HCHO + .38 CO <sub>2</sub> + .38 HOCH <sub>2</sub> CH <sub>2</sub> O <sub>2</sub> + NO <sub>2</sub>                                       | KR02N0*(1-(.62*alpha_AN(4,2,1,0,0,temp,cair)+.38*alpha_AN(4,1,0,1,0,temp,cair))) | Taraborrelli (2016)*                         |
| G44021b | TrGCN  | LMEKO2 + NO $\rightarrow$ LMEKNO3                                                                                                                                                                                            | KR02N0*(.62*alpha_AN(4,2,1,0,0,temp,cair)+.38*alpha_AN(4,1,0,1,0,temp,cair))     | Taraborrelli (2016)                          |
| G44022a | TrGC   | LMEKOOH + OH $\rightarrow$ LMEKO2 + H <sub>2</sub> O                                                                                                                                                                         | 0.6*k_CH300H_OH                                                                  | Taraborrelli (2016)                          |
| G44022b | TrGC   | LMEKOOH + OH $\rightarrow$ .62 BIACET + .38 HCHO + .38 CO <sub>2</sub> + .38 HOCH <sub>2</sub> CH <sub>2</sub> O <sub>2</sub> + H <sub>2</sub> O + OH                                                                        | (.62*k_t*f_tooh*f_co+.38*k_s*f_sooH)                                             | Taraborrelli (2016)                          |
| G44023a | TrGCN  | LC4H9NO3 + OH $\rightarrow$ MEK + NO <sub>2</sub> + H <sub>2</sub> O                                                                                                                                                         | (k_t*f_ono2*f_alk+k_p*f_alk+k_s*f_ch2ono2+k_p)*(k_s/(k_p+k_s))                   | Taraborrelli (2016)*                         |
| G44023b | TrGCN  | LC4H9NO3 + OH $\rightarrow$ C <sub>3</sub> H <sub>7</sub> CHO + NO <sub>2</sub> + H <sub>2</sub> O                                                                                                                           | (k_p+k_s*(1+f_ch2ono2+f_ono2)*f_alk)*(k_p/(k_p+k_s))                             | Taraborrelli (2016)*                         |
| G44024  | TrGCN  | MPAN + OH $\rightarrow$ CH <sub>3</sub> COCH <sub>2</sub> OH + CO + NO <sub>2</sub>                                                                                                                                          | 3.2E-11                                                                          | Orlando et al. (2002)                        |
| G44025  | TrGCN  | MPAN $\rightarrow$ MACO3 + NO <sub>2</sub>                                                                                                                                                                                   | k_PAN_M                                                                          | see note*                                    |
| G44026  | TrGC   | LMEKO2 $\rightarrow$ .538 HCHO + .538 CO <sub>2</sub> + .459 HOCH <sub>2</sub> CH <sub>2</sub> O <sub>2</sub> + .079 C <sub>2</sub> H <sub>5</sub> O <sub>2</sub> + .462 CH <sub>3</sub> C(O) + .462 CH <sub>3</sub> CHO     | (.62*k1_R02s0R02+.38*k1_R02p0R02)                                                | Rickard and Pascoe (2009)*                   |
| G44027  | TrGC   | MACR + OH $\rightarrow$ .45 MACO3 + .55 MACRO2                                                                                                                                                                               | 8.E-12*EXP(380./temp)                                                            | Orlando et al. (1999b), Taraborrelli (2016)  |
| G44028  | TrGC   | MACR + O <sub>3</sub> $\rightarrow$ .5481 CO + .1392 HO <sub>2</sub> + .1392 OH + .3219 CH <sub>2</sub> OO + .87 MGLYOX + .13 HCHO + .13 OH + .065 HCOCOCH <sub>2</sub> O <sub>2</sub> + .065 CO + .065 CH <sub>3</sub> C(O) | 1.36E-15*EXP(-2112./temp)                                                        | Taraborrelli (2016)                          |
| G44029  | TrGCN  | MACR + NO <sub>3</sub> $\rightarrow$ MACO3 + HNO <sub>3</sub>                                                                                                                                                                | KN03AL*2.0                                                                       | Rickard and Pascoe (2009)                    |
| G44030a | TrGC   | MACO3 $\rightarrow$ CH <sub>3</sub> C(O) + HCHO + CO <sub>2</sub>                                                                                                                                                            | k1_R02RC03*0.9                                                                   | Taraborrelli (2016)                          |
| G44030b | TrGC   | MACO3 $\rightarrow$ MACO2H                                                                                                                                                                                                   | k1_R02RC03*0.1                                                                   | Taraborrelli (2016)                          |
| G44031a | TrGC   | MACO3 + HO <sub>2</sub> $\rightarrow$ MACO2 + OH                                                                                                                                                                             | KAPH02*rc03_oh                                                                   | Taraborrelli (2016)                          |
| G44031b | TrGC   | MACO3 + HO <sub>2</sub> $\rightarrow$ MACO3H                                                                                                                                                                                 | KAPH02*rc03_ooh                                                                  | Taraborrelli (2016)                          |
| G44031c | TrGC   | MACO3 + HO <sub>2</sub> $\rightarrow$ MACO2H + O <sub>3</sub>                                                                                                                                                                | KAPH02*rc03_o3                                                                   | Taraborrelli (2016)                          |
| G44032  | TrGCN  | MACO3 + NO $\rightarrow$ MACO2 + NO <sub>2</sub>                                                                                                                                                                             | 8.70E-12*EXP(290./temp)                                                          | Taraborrelli (2016)                          |
| G44033  | TrGCN  | MACO3 + NO <sub>2</sub> $\rightarrow$ MPAN                                                                                                                                                                                   | k_CH3C03_NO2                                                                     | Rickard and Pascoe (2009)                    |
| G44034  | TrGCN  | MACO3 + NO <sub>3</sub> $\rightarrow$ MACO2 + NO <sub>2</sub>                                                                                                                                                                | KR02N03*1.60                                                                     | Taraborrelli (2016)                          |

Table 1: Gas phase reactions (... continued)

| #       | labels | reaction                                                                                                                                                                            | rate coefficient                                                                    | reference                  |
|---------|--------|-------------------------------------------------------------------------------------------------------------------------------------------------------------------------------------|-------------------------------------------------------------------------------------|----------------------------|
| G44035  | TrGC   | MACRO2 $\rightarrow$ .7 CH <sub>3</sub> COCH <sub>2</sub> OH + .7 HCHO + .7 HO <sub>2</sub> + .3 MACROH                                                                             | k1_R02t0R02                                                                         | Rickard and Pascoe (2009)* |
| G44036a | TrGC   | MACRO2 + HO <sub>2</sub> $\rightarrow$ MACRO + OH                                                                                                                                   | KR02H02(4)*rcoch2o2_oh                                                              | Taraborrelli (2016)        |
| G44036b | TrGC   | MACRO2 + HO <sub>2</sub> $\rightarrow$ MACROOH                                                                                                                                      | KR02H02(4)*rcoch2o2_ooh                                                             | Taraborrelli (2016)        |
| G44037a | TrGCN  | MACRO2 + NO $\rightarrow$ MACRO + NO <sub>2</sub>                                                                                                                                   | KR02N0*(1.-alpha_AN(6,3,1,0,0, temp, cair))                                         | Taraborrelli (2016)        |
| G44037b | TrGCN  | MACRO2 + NO $\rightarrow$ MACRN                                                                                                                                                     | KR02N0*alpha_AN(6,3,1,0,0,temp, cair)                                               | Taraborrelli (2016)        |
| G44038  | TrGCN  | MACRO2 + NO <sub>3</sub> $\rightarrow$ MACRO + NO <sub>2</sub>                                                                                                                      | KR02N03                                                                             | Taraborrelli (2016)        |
| G44039a | TrGC   | MACROOH + OH $\rightarrow$ MACRO2                                                                                                                                                   | 0.6*k_CH300H_OH                                                                     | Taraborrelli (2016)        |
| G44039b | TrGC   | MACROOH + OH $\rightarrow$ CO + CH <sub>3</sub> COCH <sub>2</sub> OH + OH                                                                                                           | k_t*f_o*f_tch2oh*f_alk                                                              | Taraborrelli (2016)        |
| G44039c | TrGC   | MACROOH + OH $\rightarrow$ CO + MGLYOX + HO <sub>2</sub>                                                                                                                            | (k_s*f_soh*f_pch2oh + k_rohro)                                                      | Taraborrelli (2016)        |
| G44040  | TrGC   | MACROH + OH $\rightarrow$ CH <sub>3</sub> COCH <sub>2</sub> OH + CO + HO <sub>2</sub>                                                                                               | k_t*f_o*f_tch2oh*f_alk                                                              | Taraborrelli (2016)        |
| G44041  | TrGC   | MACRO $\rightarrow$ .885 CH <sub>3</sub> COCH <sub>2</sub> OH + .885 CO + .115 MGLYOX + .115 HCHO + HO <sub>2</sub>                                                                 | KDEC                                                                                | Taraborrelli (2016)        |
| G44042  | TrGC   | MACO2H + OH $\rightarrow$ CH <sub>3</sub> COCH <sub>2</sub> OH + HO <sub>2</sub> + CO <sub>2</sub>                                                                                  | ((k_adt+k_adp)*a_co2h+k_co2h)                                                       | Taraborrelli (2016)        |
| G44043a | TrGC   | MACO3H + OH $\rightarrow$ CH <sub>3</sub> COCH <sub>2</sub> OH + CO <sub>2</sub> + OH                                                                                               | (k_adt+k_adp)*a_co2h                                                                | Taraborrelli (2016)        |
| G44043b | TrGC   | MACO3H + OH $\rightarrow$ MACO3                                                                                                                                                     | 0.6*k_CH300H_OH                                                                     | Taraborrelli (2016)        |
| G44044  | TrGC   | LHMKABO2 $\rightarrow$ .024 CO2H3CHO + .072 MGLYOX + .072 HO <sub>2</sub> + .072 HCHO + .5280 CH <sub>3</sub> C(O) + .5280 HOCH <sub>2</sub> CHO + .176 BIACETOH + .2 HO12CO3C4     | (.12*k1_R02p0R02+.88*k1_R02s0R02)                                                   | Taraborrelli (2016)        |
| G44045a | TrGC   | LHMKABO2 + HO <sub>2</sub> $\rightarrow$ OH + HOCH <sub>2</sub> CHO + CH <sub>3</sub> C(O)                                                                                          | KR02H02(4)*.88*rcoch2o2_oh                                                          | Taraborrelli (2016)        |
| G44045b | TrGC   | LHMKABO2 + HO <sub>2</sub> $\rightarrow$ LHMKABOOH                                                                                                                                  | KR02H02(4)*(.12+.88*rcoch2o2_ooh)                                                   | Taraborrelli (2016)        |
| G44046a | TrGCN  | LHMKABO2 + NO $\rightarrow$ .12 MGLYOX + .12 HO <sub>2</sub> + .88 HOCH <sub>2</sub> CHO + .88 CH <sub>3</sub> C(O) + .12 HCHO + NO <sub>2</sub>                                    | KR02N0*(1.-(.12*alpha_AN(6,1,0,1,0,temp, cair)+.88*alpha_AN(6,2,1,0,0,temp, cair))) | Taraborrelli (2016)        |
| G44046b | TrGCN  | LHMKABO2 + NO $\rightarrow$ MVKNO3                                                                                                                                                  | KR02N0*(.12*alpha_AN(6,1,0,1,0,temp, cair)+.88*alpha_AN(6,2,1,0,0,temp, cair))      | Taraborrelli (2016)*       |
| G44047  | TrGCN  | LHMKABO2 + NO <sub>3</sub> $\rightarrow$ .12 MGLYOX + .12 HO <sub>2</sub> + .88 HOCH <sub>2</sub> CHO + .88 CH <sub>3</sub> C(O) + .12 HCHO + .12 HO <sub>2</sub> + NO <sub>2</sub> | KR02N03                                                                             | Taraborrelli (2016)        |
| G44048a | TrGC   | LHMKABOOH + OH $\rightarrow$ LHMKABO2                                                                                                                                               | 0.6*k_CH300H_OH                                                                     | Taraborrelli (2016)        |
| G44048b | TrGC   | LHMKABOOH + OH $\rightarrow$ .12 CO2H3CHO + .88 BIACETOH + OH                                                                                                                       | (.12*k_s*f_soh*f_pch2oh+.88*k_t*f_tooh*f_pch2oh*f_co)                               | Taraborrelli (2016)        |

Table 1: Gas phase reactions (... continued)

| #       | labels | reaction                                                                                                                                                                           | rate coefficient                                                      | reference                 |
|---------|--------|------------------------------------------------------------------------------------------------------------------------------------------------------------------------------------|-----------------------------------------------------------------------|---------------------------|
| G44049a | TrGC   | $\text{CO}_2\text{H}_3\text{CHO} + \text{OH} \rightarrow \text{CO}_2\text{H}_3\text{CO}_3$                                                                                         | $k_{\text{t*f}_\text{o*f}_\text{alk}}$                                | Taraborrelli (2016)       |
| G44049b | TrGC   | $\text{CO}_2\text{H}_3\text{CHO} + \text{OH} \rightarrow \text{CH}_3\text{COCOCHO} + \text{HO}_2 + \text{H}_2\text{O}$                                                             | $k_{\text{t*f}_\text{co*f}_\text{toh*f}_\text{cho}}$                  | Taraborrelli (2016)       |
| G44050  | TrGCN  | $\text{CO}_2\text{H}_3\text{CHO} + \text{NO}_3 \rightarrow \text{CO}_2\text{H}_3\text{CO}_3 + \text{HNO}_3$                                                                        | $\text{KN03AL*4.0}$                                                   | Rickard and Pascoe (2009) |
| G44051  | TrGC   | $\text{CO}_2\text{H}_3\text{CO}_3 \rightarrow \text{MGLYOX} + \text{HO}_2 + \text{CO}_2$                                                                                           | $k1_{\text{R02RC03}}$                                                 | Taraborrelli (2016)       |
| G44052a | TrGC   | $\text{CO}_2\text{H}_3\text{CO}_3 + \text{HO}_2 \rightarrow \text{OH} + \text{MGLYOX} + \text{HO}_2 + \text{CO}_2$                                                                 | $\text{KAPH02*rco3\_oh}$                                              | Taraborrelli (2016)       |
| G44052b | TrGC   | $\text{CO}_2\text{H}_3\text{CO}_3 + \text{HO}_2 \rightarrow \text{CO}_2\text{H}_3\text{CO}_2\text{H} + \text{O}_3$                                                                 | $\text{KAPH02*rco3\_o3}$                                              | Taraborrelli (2016)       |
| G44052c | TrGC   | $\text{CO}_2\text{H}_3\text{CO}_3 + \text{HO}_2 \rightarrow \text{CO}_2\text{H}_3\text{CO}_3\text{H}$                                                                              | $\text{KAPH02*rco3\_ooh}$                                             | Taraborrelli (2016)       |
| G44053  | TrGCN  | $\text{CO}_2\text{H}_3\text{CO}_3 + \text{NO} \rightarrow \text{MGLYOX} + \text{HO}_2 + \text{NO}_2 + \text{CO}_2$                                                                 | $\text{KAPNO}$                                                        | Taraborrelli (2016)       |
| G44054  | TrGCN  | $\text{CO}_2\text{H}_3\text{CO}_3 + \text{NO}_3 \rightarrow \text{MGLYOX} + \text{HO}_2 + \text{NO}_2 + \text{CO}_2$                                                               | $\text{KR02N03*1.60}$                                                 | Taraborrelli (2016)       |
| G44055a | TrGC   | $\text{CO}_2\text{H}_3\text{CO}_3\text{H} + \text{OH} \rightarrow \text{CO}_2\text{H}_3\text{CO}_3$                                                                                | $0.6*k_{\text{CH300H\_OH}}$                                           | Taraborrelli (2016)       |
| G44055b | TrGC   | $\text{CO}_2\text{H}_3\text{CO}_3\text{H} + \text{OH} \rightarrow \text{CH}_3\text{C}(\text{O}) + \text{CO} + \text{CO}_2 + \text{OH}$                                             | $(k_{\text{t*f}_\text{co2h*f}_\text{co*f}_\text{toh}})$               | Taraborrelli (2016)       |
| G44056  | TrGC   | $\text{CO}_2\text{H}_3\text{CO}_2\text{H} + \text{OH} \rightarrow \text{CH}_3\text{COCO}_2\text{H} + \text{HO}_2$                                                                  | $k_{\text{t*f}_\text{co2h*f}_\text{co*f}_\text{toh}+k_{\text{co2h}}}$ | Taraborrelli (2016)       |
| G44057a | TrGC   | $\text{HO}_1\text{C}_2\text{O}_3\text{C}_4 + \text{OH} \rightarrow \text{BIACETO}_2\text{H} + \text{HO}_2$                                                                         | $k_{\text{t*f}_\text{toh*f}_\text{alk*f}_\text{co}}$                  | Taraborrelli (2016)       |
| G44057b | TrGC   | $\text{HO}_1\text{C}_2\text{O}_3\text{C}_4 + \text{OH} \rightarrow \text{CO}_2\text{H}_3\text{CHO} + \text{HO}_2$                                                                  | $k_{\text{s*f}_\text{soh*f}_\text{alk}}$                              | Taraborrelli (2016)       |
| G44058  | TrGC   | $\text{MACO}_2 \rightarrow .65 \text{CH}_3 + .65 \text{CO} + .65 \text{HCHO} + .35 \text{OH} + .35 \text{CH}_3\text{COCH}_2\text{O}_2 + \text{CO}_2$                               | $\text{KDEC}$                                                         | Taraborrelli (2016)       |
| G44059  | TrGC   | $\text{LHMVKABO}_2 \rightarrow .88 \text{MGLYOX} + .88 \text{HCHO} + .12 \text{HOOCH}_2\text{CHO} + .12 \text{CH}_3\text{C}(\text{O}) + \text{OH}$                                 | $\text{KHSD}$                                                         | Taraborrelli (2016)       |
| G44060  | TrGC   | $\text{MACRO}_2 \rightarrow \text{MGLYOX} + \text{HCHO} + \text{OH}$                                                                                                               | $\text{KHSB}$                                                         | Taraborrelli (2016)       |
| G44061a | TrGCN  | $\text{MVKNO}_3 + \text{OH} \rightarrow \text{MGLYOX} + \text{CO}_2 + \text{HO}_2 + \text{NO}_2 + \text{H}_2\text{O}$                                                              | $k_{\text{s*f}_\text{sooh*f}_\text{ch2ono2}+k_{\text{rohro}}}$        | Taraborrelli (2016)*      |
| G44061b | TrGCN  | $\text{MVKNO}_3 + \text{OH} \rightarrow \text{BIACETO}_2\text{H} + \text{NO}_2 + \text{H}_2\text{O}$                                                                               | $k_{\text{t*f}_\text{ono2*f}_\text{co*f}_\text{pch2oh}}$              | Taraborrelli (2016)*      |
| G44062a | TrGCN  | $\text{MACRN} + \text{OH} \rightarrow \text{CH}_3\text{COCH}_2\text{OH} + \text{CO}_2 + \text{NO}_2 + \text{H}_2\text{O}$                                                          | $k_{\text{t*f}_\text{o*f}_\text{ch2ono2}}$                            | Taraborrelli (2016)*      |
| G44062b | TrGCN  | $\text{MACRN} + \text{OH} \rightarrow \text{MGLYOX} + \text{CO} + \text{NO}_2 + \text{H}_2\text{O}$                                                                                | $k_{\text{rohro}+k_{\text{s*f}_\text{sooh*f}_\text{ch2ono2}}}$        | Taraborrelli (2016)*      |
| G44063  | TrGC   | $\text{MACRO}_2 \rightarrow \text{CH}_3\text{COCH}_2\text{OH} + \text{OH} + \text{CO}$                                                                                             | $\text{K14HSAL}$                                                      | Taraborrelli (2016)       |
| G44064  | TrGC   | $\text{EZCH}_3\text{CO}_2\text{CHCHO} \rightarrow .9 \text{CH}_3\text{COCHCO} + .1 \text{CH}_3\text{C}(\text{O}) + .01 \text{GLYOX} + .18 \text{CO} + .09 \text{HO}_2 + \text{OH}$ | $\text{K15HS24VYNAL}$                                                 | Taraborrelli (2016)       |
| G44065  | TrGC   | $\text{EZCH}_3\text{CO}_2\text{CHCHO} + \text{HO}_2 \rightarrow \text{CH}_3\text{COOHCHCHO}$                                                                                       | $\text{KR02H02(4)}$                                                   | Taraborrelli (2016)       |
| G44066  | TrGCN  | $\text{EZCH}_3\text{CO}_2\text{CHCHO} + \text{NO} \rightarrow \text{CH}_3\text{COCHO}_2\text{CHO} + \text{NO}_2$                                                                   | $\text{KR02N0}$                                                       | Taraborrelli (2016)*      |
| G44067  | TrGCN  | $\text{EZCH}_3\text{CO}_2\text{CHCHO} + \text{NO}_3 \rightarrow \text{CH}_3\text{COCHO}_2\text{CHO} + \text{NO}_2$                                                                 | $\text{kR02N03}$                                                      | Taraborrelli (2016)       |
| G44068  | TrGC   | $\text{EZCH}_3\text{CO}_2\text{CHCHO} \rightarrow \text{CH}_3\text{COCHO}_2\text{CHO}$                                                                                             | $k1_{\text{R02sOR02}}$                                                | Taraborrelli (2016)       |
| G44069  | TrGC   | $\text{EZCHOCCH}_3\text{CHO}_2 \rightarrow \text{HCOCCH}_3\text{CO} + \text{OH}$                                                                                                   | $\text{K15HS24VYNAL}$                                                 | Taraborrelli (2016)       |
| G44070  | TrGCN  | $\text{EZCHOCCH}_3\text{CHO}_2 + \text{NO} \rightarrow \text{HCOCO}_2\text{CH}_3\text{CHO} + \text{NO}_2$                                                                          | $\text{KR02N0}$                                                       | Taraborrelli (2016)*      |
| G44071  | TrGC   | $\text{EZCHOCCH}_3\text{CHO}_2 + \text{HO}_2 \rightarrow \text{HCOCCH}_3\text{CHOOH}$                                                                                              | $\text{KR02H02(4)}$                                                   | Taraborrelli (2016)       |
| G44072  | TrGCN  | $\text{EZCHOCCH}_3\text{CHO}_2 + \text{NO}_3 \rightarrow \text{HCOCO}_2\text{CH}_3\text{CHO} + \text{NO}_2$                                                                        | $\text{KR02N03}$                                                      | Taraborrelli (2016)       |

Table 1: Gas phase reactions (... continued)

| #       | labels | reaction                                                                                                                                                                                           | rate coefficient                                        | reference                                         |
|---------|--------|----------------------------------------------------------------------------------------------------------------------------------------------------------------------------------------------------|---------------------------------------------------------|---------------------------------------------------|
| G44073  | TrGC   | $\text{EZCHOCCH}_3\text{CHO}_2 \rightarrow \text{HCOCO}_2\text{CH}_3\text{CHO}$                                                                                                                    | k1_R02p0R02                                             | Taraborrelli (2016)                               |
| G44074  | TrGC   | $\text{CH}_3\text{COOHCHCHO} \rightarrow \text{CH}_3\text{COCHO}_2\text{CHO} + \text{OH}$                                                                                                          | KHYDEC                                                  | Taraborrelli (2016)                               |
| G44075  | TrGC   | $\text{HCOCCH}_3\text{CHOOH} \rightarrow \text{HCOCO}_2\text{CH}_3\text{CHO} + \text{OH}$                                                                                                          | KHYDEC                                                  | Taraborrelli (2016)                               |
| G44076  | TrGCN  | $\text{CH}_3\text{COCHO}_2\text{CHO} + \text{NO} \rightarrow \text{CH}_3\text{C}(\text{O}) + \text{GLYOX} + \text{NO}_2$                                                                           | KR02N0                                                  | Taraborrelli (2016)*                              |
| G44077  | TrGCN  | $\text{CH}_3\text{COCHO}_2\text{CHO} + \text{NO}_3 \rightarrow \text{CH}_3\text{C}(\text{O}) + \text{GLYOX} + \text{NO}_2$                                                                         | KR02N03                                                 | Taraborrelli (2016)                               |
| G44078  | TrGC   | $\text{CH}_3\text{COCHO}_2\text{CHO} + \text{HO}_2 \rightarrow \text{CH}_3\text{C}(\text{O}) + \text{GLYOX} + \text{OH}$                                                                           | KR02H02(4)                                              | Taraborrelli (2016)*                              |
| G44079  | TrGC   | $\text{CH}_3\text{COCHO}_2\text{CHO} \rightarrow \text{CH}_3\text{C}(\text{O}) + \text{GLYOX}$                                                                                                     | k1_R02s0R02                                             | Taraborrelli (2016)                               |
| G44080  | TrGC   | $\text{HCOCO}_2\text{CH}_3\text{CHO} \rightarrow \text{MGLYOX} + \text{CO} + \text{HO}_2$                                                                                                          | k1_R02t0R02                                             | Taraborrelli (2016)                               |
| G44081  | TrGCN  | $\text{HCOCO}_2\text{CH}_3\text{CHO} + \text{NO} \rightarrow \text{MGLYOX} + \text{CO} + \text{HO}_2 + \text{NO}_2$                                                                                | KR02N0                                                  | Taraborrelli (2016)*                              |
| G44082  | TrGC   | $\text{HCOCO}_2\text{CH}_3\text{CHO} + \text{HO}_2 \rightarrow \text{MGLYOX} + \text{CO} + \text{HO}_2 + \text{OH}$                                                                                | KR02H02(4)                                              | Taraborrelli (2016)*                              |
| G44083  | TrGCN  | $\text{HCOCO}_2\text{CH}_3\text{CHO} + \text{NO}_3 \rightarrow \text{MGLYOX} + \text{CO} + \text{HO}_2 + \text{NO}_2$                                                                              | KR02N03                                                 | Taraborrelli (2016)                               |
| G44084  | TrGC   | $\text{HCOCCH}_3\text{CO} + \text{OH} \rightarrow \text{CO} + \text{MGLYOX} + \text{HO}_2$                                                                                                         | 1E-10*a_cho                                             | Hatakeyama et al. (1985),<br>Taraborrelli (2016)  |
| G44085  | TrGC   | $\text{CH}_3\text{COCHCO} + \text{OH} \rightarrow \text{CO} + \text{MGLYOX} + \text{HO}_2$                                                                                                         | 7.6E-11*a_coch3                                         | Hatakeyama et al. (1985),<br>Taraborrelli (2016)* |
| G44086  | TrGCN  | $\text{LMEKNO}_3 + \text{OH} \rightarrow .62 \text{ MGLYOX} + .62 \text{ HCHO} + .62 \text{ HO}_2 + .62 \text{ NO}_2 + .38 \text{ CH}_3\text{C}(\text{O}) + .38 \text{ NO}_3\text{CH}_2\text{CHO}$ | .62*(k_p*(f_co+f_ch2ono2))<br>+.38*(k_s*f_ch2ono2*f_co) | Taraborrelli (2016)*                              |
| G44087  | TrGC   | $\text{MEPROPENE} + \text{OH} \rightarrow \text{IBUTOLBO}_2$                                                                                                                                       | 9.4E-12*EXP(505./temp)                                  | Atkinson et al. (2006)                            |
| G44088a | TrGC   | $\text{MEPROPENE} + \text{O}_3 \rightarrow \text{CH}_3\text{COCH}_3 + \text{CH}_2\text{OO}^*$                                                                                                      | 2.7E-15*EXP(-1630./temp)*0.33                           | Atkinson et al. (2006), Taraborrelli (2016)       |
| G44088b | TrGC   | $\text{MEPROPENE} + \text{O}_3 \rightarrow \text{CH}_3\text{COCH}_2\text{O}_2 + \text{OH} + \text{HCHO}$                                                                                           | 2.7E-15*EXP(-1630./temp)*0.67                           | Atkinson et al. (2006), Taraborrelli (2016)       |
| G44089  | TrGCN  | $\text{MEPROPENE} + \text{NO}_3 \rightarrow \text{CH}_3\text{COCH}_3 + \text{HCHO} + \text{NO}_2$                                                                                                  | 3.4E-13                                                 | Atkinson et al. (2006), Taraborrelli (2016)*      |
| G44090  | TrGC   | $\text{IBUTOLBO}_2 \rightarrow \text{CH}_3\text{COCH}_3 + \text{HCHO} + \text{HO}_2$                                                                                                               | k1_R02t0R02                                             | Taraborrelli (2016)                               |
| G44091a | TrGC   | $\text{IBUTOLBO}_2 + \text{HO}_2 \rightarrow \text{IBUTOLBOOH}$                                                                                                                                    | KR02H02(4)*rcoch2o2_ooh                                 | Taraborrelli (2016)                               |
| G44091b | TrGC   | $\text{IBUTOLBO}_2 + \text{HO}_2 \rightarrow \text{CH}_3\text{COCH}_3 + \text{HCHO} + \text{HO}_2 + \text{OH}$                                                                                     | KR02H02(4)*rcoch2o2_oh                                  | Taraborrelli (2016)                               |
| G44092a | TrGCN  | $\text{IBUTOLBO}_2 + \text{NO} \rightarrow \text{CH}_3\text{COCH}_3 + \text{HCHO} + \text{HO}_2 + \text{NO}_2$                                                                                     | KR02N0*(1.-alpha_AN(5,3,0,0,0,temp,cair))               | Taraborrelli (2016)                               |
| G44092b | TrGCN  | $\text{IBUTOLBO}_2 + \text{NO} \rightarrow \text{IBUTOLBNO}_3$                                                                                                                                     | KR02N0*alpha_AN(5,3,0,0,0,temp,cair)                    | Taraborrelli (2016)                               |

Table 1: Gas phase reactions (... continued)

| #       | labels | reaction                                                                                                                                                                                                                           | rate coefficient                          | reference                                    |
|---------|--------|------------------------------------------------------------------------------------------------------------------------------------------------------------------------------------------------------------------------------------|-------------------------------------------|----------------------------------------------|
| G44093  | TrGCN  | IBUTOLBO2 + NO <sub>3</sub> → CH <sub>3</sub> COCH <sub>3</sub> + HCHO + HO <sub>2</sub> + NO <sub>2</sub>                                                                                                                         | KR02N03                                   | Taraborrelli (2016)                          |
| G44094a | TrGC   | IBUTOLBOOH + OH → IBUTOLBO2                                                                                                                                                                                                        | .6*k_CH300H_OH                            | Taraborrelli (2016)                          |
| G44094b | TrGC   | IBUTOLBOOH + OH → CH <sub>3</sub> COCH <sub>3</sub> + HCHO + HO <sub>2</sub>                                                                                                                                                       | k_s*f_sooh*f_pch2oh                       | Taraborrelli (2016)                          |
| G44095  | TrGCN  | IBUTOLBNO3 + OH → CH <sub>3</sub> COCH <sub>3</sub> + HCHO + HO <sub>2</sub> + NO <sub>2</sub>                                                                                                                                     | 3.*k_p                                    | Taraborrelli (2016)                          |
| G44096  | TrGC   | BUT1ENE + OH → LBUT1ENO2                                                                                                                                                                                                           | 6.6E-12*EXP(465./temp)                    | Atkinson et al. (2006)*                      |
| G44097a | TrGC   | BUT1ENE + O <sub>3</sub> → HCHO + .5 C <sub>2</sub> H <sub>5</sub> CHO + .5 H <sub>2</sub> O <sub>2</sub> + .5 CH <sub>3</sub> CHO + .5 CO + .5 HO <sub>2</sub>                                                                    | 3.35E-15*EXP(-1745./temp)*.57             | Atkinson et al. (2006), Taraborrelli (2016)* |
| G44097b | TrGC   | BUT1ENE + O <sub>3</sub> → C <sub>2</sub> H <sub>5</sub> CHO + CH <sub>2</sub> OO*                                                                                                                                                 | 3.35E-15*EXP(-1745./temp)*.43             | Atkinson et al. (2006), Taraborrelli (2016)* |
| G44098  | TrGCN  | BUT1ENE + NO <sub>3</sub> → C <sub>2</sub> H <sub>5</sub> CHO + HCHO + NO <sub>2</sub>                                                                                                                                             | 3.2E-13*EXP(-950./temp)                   | Atkinson et al. (2006), Taraborrelli (2016)* |
| G44099  | TrGC   | LBUT1ENO2 → C <sub>2</sub> H <sub>5</sub> CHO + HCHO + HO <sub>2</sub>                                                                                                                                                             | k1_R02s0R02                               | Taraborrelli (2016)                          |
| G44100a | TrGC   | LBUT1ENO2 + HO <sub>2</sub> → LBUT1ENOOH                                                                                                                                                                                           | KR02H02(4)*rcoch2o2_ooh                   | Taraborrelli (2016)                          |
| G44100b | TrGC   | LBUT1ENO2 + HO <sub>2</sub> → C <sub>2</sub> H <sub>5</sub> CHO + HCHO + HO <sub>2</sub> + OH                                                                                                                                      | KR02H02(4)*rcoch2o2_oh                    | Taraborrelli (2016)                          |
| G44101a | TrGCN  | LBUT1ENO2 + NO → C <sub>2</sub> H <sub>5</sub> CHO + HCHO + HO <sub>2</sub> + NO <sub>2</sub>                                                                                                                                      | KR02N0*(1.-alpha_AN(5,2,0,0,0,temp,cair)) | Taraborrelli (2016)                          |
| G44101b | TrGCN  | LBUT1ENO2 + NO → LBUT1ENNO3                                                                                                                                                                                                        | KR02N0*alpha_AN(5,2,0,0,0,temp,cair)      | Taraborrelli (2016)                          |
| G44102  | TrGCN  | LBUT1ENO2 + NO <sub>3</sub> → C <sub>2</sub> H <sub>5</sub> CHO + HCHO + HO <sub>2</sub> + NO <sub>2</sub>                                                                                                                         | KR02N03                                   | Taraborrelli (2016)                          |
| G44103a | TrGC   | LBUT1ENOOH + OH → LBUT1ENO2                                                                                                                                                                                                        | .6*k_CH300H_OH                            | Taraborrelli (2016)                          |
| G44103b | TrGC   | LBUT1ENOOH + OH → C <sub>2</sub> H <sub>5</sub> CO <sub>3</sub> + HCHO + HO <sub>2</sub>                                                                                                                                           | k_t*f_tooh*f_pch2oh                       | Taraborrelli (2016)*                         |
| G44104  | TrGCN  | LBUT1ENNO3 + OH → C <sub>2</sub> H <sub>5</sub> CHO + CO + HO <sub>2</sub> + NO <sub>2</sub>                                                                                                                                       | k_s*f_soh*f_ch2ono2                       | Taraborrelli (2016)*                         |
| G44105  | TrGC   | CBUT2ENE + OH → BUT2OLO2                                                                                                                                                                                                           | 1.1E-11*EXP(485./temp)                    | Atkinson et al. (2006)                       |
| G44106  | TrGC   | CBUT2ENE + O <sub>3</sub> → CH <sub>3</sub> CHO + .16 CH <sub>3</sub> CHOHOH + .50 OH + .50 HCOCH <sub>2</sub> O <sub>2</sub> + .05 CH <sub>2</sub> CO + .09 CH <sub>3</sub> OH + .09 CO + .2 CH <sub>4</sub> + .2 CO <sub>2</sub> | 3.2E-15*EXP(-965./temp)                   | Atkinson et al. (2006), Taraborrelli (2016)* |
| G44107  | TrGCN  | CBUT2ENE + NO <sub>3</sub> → 2 CH <sub>3</sub> CHO + NO <sub>2</sub>                                                                                                                                                               | 3.5E-13                                   | Atkinson et al. (2006), Taraborrelli (2016)* |
| G44108  | TrGC   | TBUT2ENE + OH → BUT2OLO2                                                                                                                                                                                                           | 1.0E-11*EXP(553./temp)                    | Atkinson et al. (2006)                       |

Table 1: Gas phase reactions (... continued)

| #       | labels | reaction                                                                                                                                                                                                                                  | rate coefficient                                     | reference                                         |
|---------|--------|-------------------------------------------------------------------------------------------------------------------------------------------------------------------------------------------------------------------------------------------|------------------------------------------------------|---------------------------------------------------|
| G44109  | TrGC   | TBUT2ENE + O <sub>3</sub> → CH <sub>3</sub> CHO + .16 CH <sub>3</sub> CHOHOOH +<br>.50 OH + .50 HCOCH <sub>2</sub> O <sub>2</sub> + .05 CH <sub>2</sub> CO + .09 CH <sub>3</sub> OH +<br>.09 CO + .2 CH <sub>4</sub> + .2 CO <sub>2</sub> | 6.6E-15*EXP(-1060./temp)                             | Atkinson et al. (2006), Taraborrelli (2016)       |
| G44110  | TrGCN  | TBUT2ENE + NO <sub>3</sub> → 2 CH <sub>3</sub> CHO + NO <sub>2</sub>                                                                                                                                                                      | 1.78E-12*EXP(-530./temp)<br>+1.28E-14*EXP(570./temp) | Atkinson et al. (2006), Taraborrelli (2016)*      |
| G44111  | TrGC   | BUT2OLO2 → C <sub>2</sub> H <sub>5</sub> CHO + HCHO + HO <sub>2</sub>                                                                                                                                                                     | k1_R02s0R02                                          | Taraborrelli (2016)                               |
| G44112a | TrGC   | BUT2OLO2 + HO <sub>2</sub> → BUT2OLOOH                                                                                                                                                                                                    | KR02H02(4)*rcoch2o2_ooh                              | Taraborrelli (2016)                               |
| G44112b | TrGC   | BUT2OLO2 + HO <sub>2</sub> → 2 CH <sub>3</sub> CHO + HO <sub>2</sub> + OH                                                                                                                                                                 | KR02H02(4)*rcoch2o2_oh                               | Taraborrelli (2016)                               |
| G44113a | TrGCN  | BUT2OLO2 + NO → 2 CH <sub>3</sub> CHO + HO <sub>2</sub> + NO <sub>2</sub>                                                                                                                                                                 | KR02N0*(1.-alpha_AN(5,2,0,0,0,<br>temp,cair))        | Taraborrelli (2016)                               |
| G44113b | TrGCN  | BUT2OLO2 + NO → BUT2OLNO3                                                                                                                                                                                                                 | KR02N0*alpha_AN(5,2,0,0,0,temp,<br>cair)             | Taraborrelli (2016)                               |
| G44114  | TrGCN  | BUT2OLO2 + NO <sub>3</sub> → 2 CH <sub>3</sub> CHO + HO <sub>2</sub> + NO <sub>2</sub>                                                                                                                                                    | KR02N03                                              | Taraborrelli (2016)                               |
| G44115a | TrGC   | BUT2OLOOH + OH → BUT2OLO2                                                                                                                                                                                                                 | .6*k_CH300H_OH                                       | Taraborrelli (2016)                               |
| G44115b | TrGC   | BUT2OLOOH + OH → LMEKOOH + HO <sub>2</sub>                                                                                                                                                                                                | k_t*f_toh*f_pch2oh                                   | Taraborrelli (2016)                               |
| G44115c | TrGC   | BUT2OLOOH + OH → BUT2OLO + OH                                                                                                                                                                                                             | k_t*f_tooh*f_pch2oh                                  | Taraborrelli (2016)                               |
| G44116  | TrGCN  | BUT2OLNO3 + OH → LMEKNO3 + HO <sub>2</sub>                                                                                                                                                                                                | k_t*f_toh*f_ch2ono2                                  | Taraborrelli (2016)                               |
| G44117  | TrGC   | BUT2OLO + OH → BIACET + HO <sub>2</sub>                                                                                                                                                                                                   | k_t*f_toh*f_co                                       | Taraborrelli (2016)                               |
| G44118  | TrGC   | IPRCHO + OH → IPRCO3 + H <sub>2</sub> O                                                                                                                                                                                                   | 6.8E-12*EXP(410./temp)                               | Atkinson et al. (2006)                            |
| G44119  | TrGCN  | IPRCHO + NO <sub>3</sub> → IPRCO3 + HNO <sub>3</sub>                                                                                                                                                                                      | 1.67E-12*EXP(-1460./temp)                            | Atkinson et al. (2006)                            |
| G44120  | TrGC   | IPRCO3 → iC <sub>3</sub> H <sub>7</sub> O <sub>2</sub> + CO <sub>2</sub>                                                                                                                                                                  | k1_R02RCO3                                           | Rickard and Pascoe (2009)                         |
| G44121a | TrGC   | IPRCO3 + HO <sub>2</sub> → PERIBUACID                                                                                                                                                                                                     | KAPH02*rco3_ooh                                      | Rickard and Pascoe (2009),<br>Taraborrelli (2016) |
| G44121b | TrGC   | IPRCO3 + HO <sub>2</sub> → iC <sub>3</sub> H <sub>7</sub> O <sub>2</sub> + CO <sub>2</sub> + OH                                                                                                                                           | KAPH02*(1-rco3_ooh)                                  | Rickard and Pascoe (2009),<br>Taraborrelli (2016) |
| G44122  | TrGCN  | IPRCO3 + NO <sub>2</sub> → PIPN                                                                                                                                                                                                           | k_CH3CO3_NO2                                         | Rickard and Pascoe (2009)                         |
| G44123  | TrGCN  | IPRCO3 + NO → iC <sub>3</sub> H <sub>7</sub> O <sub>2</sub> + CO <sub>2</sub> + NO <sub>2</sub>                                                                                                                                           | KAPNO                                                | Rickard and Pascoe (2009)                         |
| G44124a | TrGC   | PERIBUACID + OH → IPRCO3 + H <sub>2</sub> O                                                                                                                                                                                               | .6*k_CH300H_OH                                       | Rickard and Pascoe (2009)                         |
| G44124b | TrGC   | PERIBUACID + OH → CH <sub>3</sub> COCH <sub>3</sub> + H <sub>2</sub> O + CO <sub>2</sub>                                                                                                                                                  | k_s*f_co2h                                           | Taraborrelli (2016)*                              |
| G44125  | TrGCN  | PIPN → IPRCO3 + NO <sub>2</sub>                                                                                                                                                                                                           | k_PAN_M                                              | Rickard and Pascoe (2009)                         |
| G44126  | TrGCN  | PIPN + OH → CH <sub>3</sub> COCH <sub>3</sub> + CO <sub>2</sub> + NO <sub>2</sub>                                                                                                                                                         | k_s*f_cpan                                           | Taraborrelli (2016)*                              |
| G44127  | TrGC   | MPROPENOL + OH → HCOOH + OH + CH <sub>3</sub> COCH <sub>3</sub>                                                                                                                                                                           | k_CH2CHOH_OH_HCOOH                                   | Taraborrelli (2016), So et al.<br>(2014)*         |
| G44128  | TrGC   | MPROPENOL + HCOOH → IPRCHO + HCOOH                                                                                                                                                                                                        | k_CH2CHOH_HCOOH                                      | Taraborrelli (2016), daSilva<br>(2010)*           |

Table 1: Gas phase reactions (... continued)

| #       | labels   | reaction                                                                                                                                                 | rate coefficient                 | reference                                                       |
|---------|----------|----------------------------------------------------------------------------------------------------------------------------------------------------------|----------------------------------|-----------------------------------------------------------------|
| G44129  | TrGC     | IPRCHO + HCOOH $\rightarrow$ MPROPENOL + HCOOH                                                                                                           | k_ALD_HCOOH                      | Taraborrelli (2016), daSilva (2010)*                            |
| G44130  | TrGC     | BUTENOL + OH $\rightarrow$ HCOOH + OH + C <sub>2</sub> H <sub>5</sub> CHO                                                                                | k_CH2CHOH_OH_HCOOH               | Taraborrelli (2016), So et al. (2014)*                          |
| G44131  | TrGC     | BUTENOL + HCOOH $\rightarrow$ C <sub>3</sub> H <sub>7</sub> CHO + HCOOH                                                                                  | k_CH2CHOH_HCOOH                  | Taraborrelli (2016), daSilva (2010)*                            |
| G44132  | TrGC     | C <sub>3</sub> H <sub>7</sub> CHO + HCOOH $\rightarrow$ BUTENOL + HCOOH                                                                                  | k_ALD_HCOOH                      | Taraborrelli (2016), daSilva (2010)*                            |
| G44133  | TrGC     | HVMK + OH $\rightarrow$ HCOOH + OH + MGLYOX                                                                                                              | 8.8E-11                          | Taraborrelli (2016), So et al. (2014), Messaadia et al. (2015)* |
| G44134  | TrGC     | HVMK + HCOOH $\rightarrow$ CO <sub>2</sub> C <sub>3</sub> CHO + HCOOH                                                                                    | k_CH2CHOH_HCOOH                  | Taraborrelli (2016), daSilva (2010)*                            |
| G44135  | TrGC     | CO <sub>2</sub> C <sub>3</sub> CHO + HCOOH $\rightarrow$ HVMK + HCOOH                                                                                    | k_ALD_HCOOH                      | Taraborrelli (2016), daSilva (2010)*                            |
| G44136  | TrGC     | HMAC + OH $\rightarrow$ HCOOH + OH + MGLYOX                                                                                                              | 8.8E-11                          | Taraborrelli (2016), So et al. (2014), Messaadia et al. (2015)* |
| G44137  | TrGC     | HMAC + HCOOH $\rightarrow$ IBUTDIAL + HCOOH                                                                                                              | k_CH2CHOH_HCOOH                  | Taraborrelli (2016), daSilva (2010)*                            |
| G44138  | TrGC     | IBUTDIAL + HCOOH $\rightarrow$ HMAC + HCOOH                                                                                                              | k_ALD_HCOOH                      | Taraborrelli (2016), daSilva (2010)*                            |
| G44139  | TrGC     | CO <sub>2</sub> C <sub>3</sub> CHO + OH $\rightarrow$ CH <sub>3</sub> COCH <sub>2</sub> O <sub>2</sub> + CO <sub>2</sub> + H <sub>2</sub> O              | k_t*f_o*f_alk+k_s*f_cho*f_co     | Taraborrelli (2016)*                                            |
| G44140  | TrGCN    | CO <sub>2</sub> C <sub>3</sub> CHO + NO <sub>3</sub> $\rightarrow$ CH <sub>3</sub> COCH <sub>2</sub> O <sub>2</sub> + CO <sub>2</sub> + HNO <sub>3</sub> | KN03AL*4.0                       | Taraborrelli (2016)*                                            |
| G44141  | TrGC     | IBUTDIAL + OH $\rightarrow$ CH <sub>3</sub> CHO + CO + HO <sub>2</sub> + CO <sub>2</sub> + H <sub>2</sub> O                                              | 2.*k_t*f_o*f_alk+k_t*f_cho*f_cho | Taraborrelli (2016)*                                            |
| G44142  | TrGCN    | IBUTDIAL + NO <sub>3</sub> $\rightarrow$ CH <sub>3</sub> CHO + CO + HO <sub>2</sub> + CO <sub>2</sub> + HNO <sub>3</sub>                                 | 2.*KN03AL*4.0                    | Taraborrelli (2016)*                                            |
| G44200  | TrGTerC  | CH <sub>3</sub> COCOCH <sub>2</sub> O <sub>2</sub> $\rightarrow$ CH <sub>3</sub> C(O) + HCHO + CO                                                        | k1_R02p0R02                      | Rickard and Pascoe (2009)                                       |
| G44201  | TrGTerC  | CH <sub>3</sub> COCOCH <sub>2</sub> O <sub>2</sub> + HO <sub>2</sub> $\rightarrow$ CH <sub>3</sub> COCOCH <sub>2</sub> OOH                               | KR02H02(4)                       | Rickard and Pascoe (2009)                                       |
| G44202  | TrGTerCN | CH <sub>3</sub> COCOCH <sub>2</sub> O <sub>2</sub> + NO $\rightarrow$ CH <sub>3</sub> C(O) + HCHO + CO + NO <sub>2</sub>                                 | KR02N0                           | Rickard and Pascoe (2009)*                                      |
| G44203a | TrGTerC  | CH <sub>3</sub> COCOCH <sub>2</sub> OOH + OH $\rightarrow$ CH <sub>3</sub> COCOCHO + OH                                                                  | k_s*f_co*f_sooh                  | Rickard and Pascoe (2009)*                                      |
| G44203b | TrGTerC  | CH <sub>3</sub> COCOCH <sub>2</sub> OOH + OH $\rightarrow$ CH <sub>3</sub> COCOCH <sub>2</sub> O <sub>2</sub>                                            | .6*k_CH300H_OH                   | Rickard and Pascoe (2009)                                       |
| G44204  | TrGTerC  | C44O <sub>2</sub> + HO <sub>2</sub> $\rightarrow$ C44OOH                                                                                                 | KR02H02(4)                       | Rickard and Pascoe (2009)                                       |
| G44205  | TrGTerCN | C44O <sub>2</sub> + NO $\rightarrow$ HCOCH <sub>2</sub> CHO + CO <sub>2</sub> + HO <sub>2</sub> + NO <sub>2</sub>                                        | KR02N0                           | Rickard and Pascoe (2009)*                                      |
| G44206  | TrGTerC  | C44O <sub>2</sub> $\rightarrow$ HCOCH <sub>2</sub> CHO + CO <sub>2</sub> + HO <sub>2</sub>                                                               | k1_R02s0R02                      | Rickard and Pascoe (2009)                                       |

Table 1: Gas phase reactions (... continued)

| #       | labels   | reaction                                                                                                             | rate coefficient                | reference                                         |
|---------|----------|----------------------------------------------------------------------------------------------------------------------|---------------------------------|---------------------------------------------------|
| G44207  | TrGTerC  | $\text{C44OOH} + \text{OH} \rightarrow \text{C44O2}$                                                                 | 7.46E-11                        | Rickard and Pascoe (2009)                         |
| G44208  | TrGTerC  | $\text{CHOC3COO2} \rightarrow \text{HCOCH2CO3} + \text{HCHO}$                                                        | k1_R02p0R02                     | Rickard and Pascoe (2009)                         |
| G44209  | TrGTerC  | $\text{CHOC3COO2} + \text{HO}_2 \rightarrow \text{C413COOOH}$                                                        | KR02H02(4)                      | Rickard and Pascoe (2009)                         |
| G44210  | TrGTerCN | $\text{CHOC3COO2} + \text{NO} \rightarrow \text{HCOCH2CO3} + \text{HCHO} + \text{NO}_2$                              | KR02N0                          | Rickard and Pascoe (2009)*                        |
| G44211  | TrGTerC  | $\text{C413COOOH} + \text{OH} \rightarrow \text{CHOC3COO2}$                                                          | 8.33E-11                        | Rickard and Pascoe (2009)                         |
| G44212  | TrGTerC  | $\text{C4CODIAL} + \text{OH} \rightarrow \text{C312COCO3}$                                                           | 3.39E-11                        | Rickard and Pascoe (2009)                         |
| G44213  | TrGTerCN | $\text{C4CODIAL} + \text{NO}_3 \rightarrow \text{C312COCO3} + \text{HNO}_3$                                          | 2.*KN03AL*4.0                   | Rickard and Pascoe (2009)                         |
| G44214  | TrGTerC  | $\text{C312COCO3} \rightarrow \text{HCOCOCH}_2\text{O}_2 + \text{CO}_2$                                              | k1_R02RC03                      | Rickard and Pascoe (2009)                         |
| G44215a | TrGTerC  | $\text{C312COCO3} + \text{HO}_2 \rightarrow \text{C312COCO3H}$                                                       | KAPH02*rco3_ooh                 | Rickard and Pascoe (2009)                         |
| G44215b | TrGTerC  | $\text{C312COCO3} + \text{HO}_2 \rightarrow \text{HCOCOCH}_2\text{O}_2 + \text{CO}_2 + \text{OH}$                    | KAPH02*(1-rco3_ooh)             | Rickard and Pascoe (2009)                         |
| G44216  | TrGTerCN | $\text{C312COCO3} + \text{NO}_2 \rightarrow \text{C312COPAN}$                                                        | k_CH3C03_N02                    | Rickard and Pascoe (2009)                         |
| G44217  | TrGTerCN | $\text{C312COCO3} + \text{NO} \rightarrow \text{HCOCOCH}_2\text{O}_2 + \text{CO}_2 + \text{NO}_2$                    | KAPN0                           | Rickard and Pascoe (2009)                         |
| G44218  | TrGTerC  | $\text{C312COCO3H} + \text{OH} \rightarrow \text{C312COCO3}$                                                         | 1.63E-11                        | Rickard and Pascoe (2009)                         |
| G44219  | TrGTerCN | $\text{C312COPAN} \rightarrow \text{C312COCO3} + \text{NO}_2$                                                        | k_PAN_M                         | Rickard and Pascoe (2009)                         |
| G44220  | TrGTerCN | $\text{C312COPAN} + \text{OH} \rightarrow \text{HCOCOCHO} + \text{CO} + \text{NO}_2$                                 | 1.27E-11                        | Rickard and Pascoe (2009)                         |
| G44221  | TrGTerC  | $\text{CH}_3\text{COCOCHO} + \text{OH} \rightarrow \text{CH}_3\text{C(O)} + 2 \text{CO}$                             | 8.4E-13*EXP(830./temp)          | Taraborrelli (2016)*                              |
| G44222  | TrGTerCN | $\text{CH}_3\text{COCOCHO} + \text{NO}_3 \rightarrow \text{CH}_3\text{C(O)} + 2 \text{CO} + \text{HNO}_3$            | KN03AL*4.0                      | Rickard and Pascoe (2009)                         |
| G44223  | TrGTerC  | $\text{IBUTALOH} + \text{OH} \rightarrow \text{IPRHOCO3}$                                                            | 1.4E-11                         | Rickard and Pascoe (2009)                         |
| G44224a | TrGTerC  | $\text{IPRHOCO3} + \text{HO}_2 \rightarrow \text{CH}_3\text{COCH}_3 + \text{CO}_2 + \text{HO}_2 + \text{OH}$         | KAPH02*rco3_oh                  | Rickard and Pascoe (2009),<br>Taraborrelli (2016) |
| G44224b | TrGTerC  | $\text{IPRHOCO3} + \text{HO}_2 \rightarrow \text{IPRHOCO2H} + \text{O}_3$                                            | KAPH02*rco3_o3                  | Rickard and Pascoe (2009),<br>Taraborrelli (2016) |
| G44224c | TrGTerC  | $\text{IPRHOCO3} + \text{HO}_2 \rightarrow \text{IPRHOCO3H}$                                                         | KAPH02*rco3_ooh                 | Rickard and Pascoe (2009),<br>Taraborrelli (2016) |
| G44225  | TrGTerCN | $\text{IPRHOCO3} + \text{NO} \rightarrow \text{CH}_3\text{COCH}_3 + \text{CO}_2 + \text{HO}_2 + \text{NO}_2$         | KAPN0                           | Rickard and Pascoe (2009)                         |
| G44226  | TrGTerCN | $\text{IPRHOCO3} + \text{NO}_2 \rightarrow \text{C4PAN5}$                                                            | k_CH3C03_N02                    | Rickard and Pascoe (2009)                         |
| G44227  | TrGTerCN | $\text{IPRHOCO3} + \text{NO}_3 \rightarrow \text{CH}_3\text{COCH}_3 + \text{CO}_2 + \text{HO}_2 + \text{NO}_2$       | KR02N03*1.74                    | Rickard and Pascoe (2009)                         |
| G44228a | TrGTerC  | $\text{IPRHOCO3} \rightarrow \text{CH}_3\text{COCH}_3 + \text{CO}_2 + \text{HO}_2$                                   | k1_R02RC03*0.7                  | Rickard and Pascoe (2009)                         |
| G44228b | TrGTerC  | $\text{IPRHOCO3} \rightarrow \text{IPRHOCO2H}$                                                                       | k1_R02RC03*0.3                  | Rickard and Pascoe (2009)                         |
| G44229  | TrGTerC  | $\text{IPRHOCO2H} + \text{OH} \rightarrow \text{CH}_3\text{COCH}_3 + \text{CO}_2 + \text{HO}_2 + \text{H}_2\text{O}$ | 1.72E-12                        | Rickard and Pascoe (2009)                         |
| G44230  | TrGTerC  | $\text{OH} + \text{IPRHOCO3H} \rightarrow \text{IPRHOCO3}$                                                           | 4.80E-12                        | Rickard and Pascoe (2009)                         |
| G44231  | TrGTerCN | $\text{C4PAN5} \rightarrow \text{IPRHOCO3} + \text{NO}_2$                                                            | K_PAN_M                         | Rickard and Pascoe (2009)                         |
| G44232  | TrGTerCN | $\text{C4PAN5} + \text{OH} \rightarrow \text{CH}_3\text{COCH}_3 + \text{CO} + \text{NO}_2$                           | 4.75E-13                        | Rickard and Pascoe (2009)                         |
| G44233a | TrGTerC  | $\text{MBOOO} \rightarrow \text{IPRHOCO2H}$                                                                          | 1.60E-17*C(ind_H20)*(0.08+0.15) | Rickard and Pascoe (2009),<br>Taraborrelli (2016) |

Table 1: Gas phase reactions (... continued)

| #       | labels   | reaction                                                                                                                                                                                    | rate coefficient         | reference                                      |
|---------|----------|---------------------------------------------------------------------------------------------------------------------------------------------------------------------------------------------|--------------------------|------------------------------------------------|
| G44233b | TrGTerC  | MBOOO $\rightarrow$ IBUTALOH + H <sub>2</sub> O <sub>2</sub>                                                                                                                                | 1.60E-17*C(ind_H2O)*0.77 | Rickard and Pascoe (2009), Taraborrelli (2016) |
| G44234  | TrGTerC  | MBOOO + CO $\rightarrow$ IBUTALOH + CO <sub>2</sub>                                                                                                                                         | 1.20E-15                 | Rickard and Pascoe (2009)                      |
| G44235  | TrGTerCN | MBOOO + NO $\rightarrow$ IBUTALOH + NO <sub>2</sub>                                                                                                                                         | 1.00E-14                 | Rickard and Pascoe (2009)                      |
| G44236  | TrGTerCN | MBOOO + NO <sub>2</sub> $\rightarrow$ IBUTALOH + NO <sub>3</sub>                                                                                                                            | 1.00E-15                 | Rickard and Pascoe (2009)                      |
| G44400  | TrGAroC  | MALANHY + OH $\rightarrow$ MALANHYO2                                                                                                                                                        | 1.4E-12                  | Rickard and Pascoe (2009)                      |
| G44401a | TrGAroC  | MALDIALOOH + OH $\rightarrow$ HOCOC4DIAL + OH                                                                                                                                               | 1.22E-10                 | Rickard and Pascoe (2009)                      |
| G44401b | TrGAroC  | MALDIALOOH + OH $\rightarrow$ MALDIALO2                                                                                                                                                     | 0.6*k_CH300H_OH          | Rickard and Pascoe (2009)                      |
| G44402  | TrGAroCN | NC4DCO2H + OH $\rightarrow$ MALANHY + NO <sub>2</sub>                                                                                                                                       | 0.6*k_CH300H_OH          | Rickard and Pascoe (2009)*                     |
| G44403  | TrGAroC  | CO14O3CO2H + OH $\rightarrow$ HCOCH <sub>2</sub> O <sub>2</sub> + 2 CO <sub>2</sub>                                                                                                         | 2.19E-11                 | Rickard and Pascoe (2009)                      |
| G44404  | TrGAroC  | BZFUOOH + OH $\rightarrow$ BZFUO2                                                                                                                                                           | 3.68E-11                 | Rickard and Pascoe (2009)                      |
| G44405  | TrGAroC  | HOCOC4DIAL + OH $\rightarrow$ CO2C4DIAL + HO <sub>2</sub>                                                                                                                                   | 3.67E-11                 | Rickard and Pascoe (2009)                      |
| G44406a | TrGAroC  | MALDIALCO3 + HO <sub>2</sub> $\rightarrow$ MALDALCO2H + O <sub>3</sub>                                                                                                                      | KAPH02*rco3_o3           | Rickard and Pascoe (2009)                      |
| G44406b | TrGAroC  | MALDIALCO3 + HO <sub>2</sub> $\rightarrow$ MALDALCO3H                                                                                                                                       | KAPH02*rco3_ooh          | Rickard and Pascoe (2009)                      |
| G44406c | TrGAroC  | MALDIALCO3 + HO <sub>2</sub> $\rightarrow$ .6 MALANHY + HO <sub>2</sub> + .4 GLYOX + .4 CO + .4 CO <sub>2</sub> + OH                                                                        | KAPH02*rco3_oh           | Rickard and Pascoe (2009)*                     |
| G44407  | TrGAroCN | MALDIALCO3 + NO $\rightarrow$ .6 MALANHY + HO <sub>2</sub> + .4 GLYOX + .4 CO + .4 CO <sub>2</sub> + NO <sub>2</sub>                                                                        | KAPNO                    | Rickard and Pascoe (2009)*                     |
| G44408  | TrGAroCN | MALDIALCO3 + NO <sub>2</sub> $\rightarrow$ MALDIALPAN                                                                                                                                       | k_CH3C03_N02             | Rickard and Pascoe (2009)                      |
| G44409  | TrGAroCN | MALDIALCO3 + NO <sub>3</sub> $\rightarrow$ .6 MALANHY + HO <sub>2</sub> + .4 GLYOX + .4 CO + .4 CO <sub>2</sub> + NO <sub>2</sub>                                                           | KR02N03*1.74             | Rickard and Pascoe (2009)*                     |
| G44410  | TrGAroC  | MALDIALCO3 $\rightarrow$ .6 MALANHY + HO <sub>2</sub> + .4 GLYOX + .4 CO + .4 CO <sub>2</sub>                                                                                               | k1_R02RC03               | Rickard and Pascoe (2009)*                     |
| G44411  | TrGAroCN | BZFUONE + NO <sub>3</sub> $\rightarrow$ NBZFUO2                                                                                                                                             | 3.00E-13                 | Rickard and Pascoe (2009)                      |
| G44412  | TrGAroC  | BZFUONE + O <sub>3</sub> $\rightarrow$ .3125 CO14O3CO2H + .1875 CO14O3CHO + .1875 H <sub>2</sub> O <sub>2</sub> + .5 CO + .5 CO <sub>2</sub> + .5 HCOCH <sub>2</sub> O <sub>2</sub> + .5 OH | 2.20E-19                 | see note*                                      |
| G44413  | TrGAroC  | BZFUONE + OH $\rightarrow$ BZFUO2                                                                                                                                                           | 4.45E-11                 | Rickard and Pascoe (2009)                      |
| G44414  | TrGAroCN | NBZFUOOH + OH $\rightarrow$ NBZFUO2                                                                                                                                                         | 6.18E-12                 | Rickard and Pascoe (2009)                      |
| G44415  | TrGAroC  | MALDALCO3H + OH $\rightarrow$ MALDIALCO3                                                                                                                                                    | 4.00E-11                 | Rickard and Pascoe (2009)                      |
| G44416  | TrGAroC  | EPXDLCO2H + OH $\rightarrow$ C3DIALO2 + CO <sub>2</sub>                                                                                                                                     | 2.31E-11                 | Rickard and Pascoe (2009)                      |
| G44417a | TrGAroC  | EPXDLCO3 + HO <sub>2</sub> $\rightarrow$ C3DIALO2 + CO <sub>2</sub> + OH                                                                                                                    | KAPH02*rco3_oh           | Rickard and Pascoe (2009)                      |
| G44417b | TrGAroC  | EPXDLCO3 + HO <sub>2</sub> $\rightarrow$ EPXDLCO2H + O <sub>3</sub>                                                                                                                         | KAPH02*rco3_o3           | Rickard and Pascoe (2009)                      |
| G44417c | TrGAroC  | EPXDLCO3 + HO <sub>2</sub> $\rightarrow$ EPXDLCO3H                                                                                                                                          | KAPH02*rco3_ooh          | Rickard and Pascoe (2009)                      |
| G44418  | TrGAroCN | EPXDLCO3 + NO $\rightarrow$ C3DIALO2 + CO <sub>2</sub> + NO <sub>2</sub>                                                                                                                    | KAPNO                    | Rickard and Pascoe (2009)                      |

Table 1: Gas phase reactions (... continued)

| #       | labels   | reaction                                                                                                                                                                               | rate coefficient                         | reference                                      |
|---------|----------|----------------------------------------------------------------------------------------------------------------------------------------------------------------------------------------|------------------------------------------|------------------------------------------------|
| G44419  | TrGAroCN | EPXDLCO <sub>3</sub> + NO <sub>2</sub> → EPXDLPAN                                                                                                                                      | k_CH3CO3_NO2                             | Rickard and Pascoe (2009)                      |
| G44420  | TrGAroCN | EPXDLCO <sub>3</sub> + NO <sub>3</sub> → C3DIALO <sub>2</sub> + CO <sub>2</sub> + NO <sub>2</sub>                                                                                      | KR02N03*1.74                             | Rickard and Pascoe (2009)                      |
| G44421  | TrGAroC  | EPXDLCO <sub>3</sub> → C3DIALO <sub>2</sub> + CO <sub>2</sub>                                                                                                                          | k1_R02RCO3                               | Rickard and Pascoe (2009)*                     |
| G44422  | TrGAroC  | MALNHYOHCO + OH → CO + CO + CO + CO <sub>2</sub> + HO <sub>2</sub>                                                                                                                     | 5.68E-12                                 | Rickard and Pascoe (2009)                      |
| G44423  | TrGAroCN | MALDIAL + NO <sub>3</sub> → MALDIALCO <sub>3</sub> + HNO <sub>3</sub>                                                                                                                  | 2*KN03AL*2.0                             | Rickard and Pascoe (2009)                      |
| G44424  | TrGAroC  | MALDIAL + O <sub>3</sub> → 1.0675 GLYOX + .125 HCHO + .1125 HCOCO <sub>2</sub> H + .0675 H <sub>2</sub> O <sub>2</sub> + .82 HO <sub>2</sub> + .57 OH + 1.265 CO + .25 CO <sub>2</sub> | 2.00E-18                                 | Rickard and Pascoe (2009)*                     |
| G44425  | TrGAroC  | MALDIAL + OH → .83 MALDIALCO <sub>3</sub> + .17 MALDIALO <sub>2</sub>                                                                                                                  | 5.20E-11                                 | Rickard and Pascoe (2009)*                     |
| G44426  | TrGAroC  | MALNHYOOH + OH → MALNHYOHCO + OH                                                                                                                                                       | 4.66E-11                                 | Rickard and Pascoe (2009)                      |
| G44427  | TrGAroCN | MALDIALPAN + OH → GLYOX + CO + CO + NO <sub>2</sub>                                                                                                                                    | 3.70E-11                                 | Rickard and Pascoe (2009)                      |
| G44428  | TrGAroCN | MALDIALPAN → MALDIALCO <sub>3</sub> + NO <sub>2</sub>                                                                                                                                  | k_PAN_M                                  | Rickard and Pascoe (2009)                      |
| G44429a | TrGAroC  | MALANHYO <sub>2</sub> + HO <sub>2</sub> → MALANHYOOH                                                                                                                                   | KR02H02(4)*(1-rcoch2o2_oh-rchohch2o2_oh) | Rickard and Pascoe (2009), Taraborrelli (2016) |
| G44429b | TrGAroC  | MALANHYO <sub>2</sub> + HO <sub>2</sub> → HCOCO <sub>2</sub> HCO <sub>3</sub> + CO <sub>2</sub> + OH                                                                                   | KR02H02(4)*(rcoch2o2_oh+rchohch2o2_oh)   | Rickard and Pascoe (2009), Taraborrelli (2016) |
| G44430  | TrGAroCN | MALANHYO <sub>2</sub> + NO → HCOCO <sub>2</sub> HCO <sub>3</sub> + CO <sub>2</sub> + NO <sub>2</sub>                                                                                   | KR02N0                                   | Rickard and Pascoe (2009)*                     |
| G44431  | TrGAroCN | MALANHYO <sub>2</sub> + NO <sub>3</sub> → HCOCO <sub>2</sub> HCO <sub>3</sub> + CO <sub>2</sub> + NO <sub>2</sub>                                                                      | KR02N03                                  | Rickard and Pascoe (2009)*                     |
| G44432  | TrGAroC  | MALANHYO <sub>2</sub> → HCOCO <sub>2</sub> HCO <sub>3</sub> + CO <sub>2</sub>                                                                                                          | k1_R02s0R02                              | Rickard and Pascoe (2009)*                     |
| G44433  | TrGAroC  | EPXDLCO <sub>3</sub> H + OH → EPXDLCO <sub>3</sub>                                                                                                                                     | 2.62E-11                                 | Rickard and Pascoe (2009)                      |
| G44434  | TrGAroC  | CO <sub>2</sub> C <sub>4</sub> DIAL + OH → CO + CO + CO + CO + HO <sub>2</sub>                                                                                                         | 2.45E-11                                 | Rickard and Pascoe (2009)                      |
| G44435a | TrGAroCN | NBZFUO <sub>2</sub> + HO <sub>2</sub> → NBZFUOOH                                                                                                                                       | KR02H02(4)*(1-rcoch2o2_oh)               | Rickard and Pascoe (2009), Taraborrelli (2016) |
| G44435b | TrGAroCN | NBZFUO <sub>2</sub> + HO <sub>2</sub> → .5 CO <sub>14</sub> O <sub>3</sub> CHO + .5 NO <sub>2</sub> + .5 NBZFUONE + .5 HO <sub>2</sub> + OH                                            | KR02H02(4)*rcoch2o2_oh                   | Rickard and Pascoe (2009), Taraborrelli (2016) |
| G44436  | TrGAroCN | NBZFUO <sub>2</sub> + NO → .5 CO <sub>14</sub> O <sub>3</sub> CHO + .5 NO <sub>2</sub> + .5 NBZFUONE + .5 HO <sub>2</sub> + NO <sub>2</sub>                                            | KR02N0                                   | Rickard and Pascoe (2009)*                     |
| G44437  | TrGAroCN | NBZFUO <sub>2</sub> + NO <sub>3</sub> → .5 CO <sub>14</sub> O <sub>3</sub> CHO + .5 NO <sub>2</sub> + .5 NBZFUONE + .5 HO <sub>2</sub> + NO <sub>2</sub>                               | KR02N03                                  | Rickard and Pascoe (2009)*                     |
| G44438  | TrGAroCN | NBZFUO <sub>2</sub> → .5 CO <sub>14</sub> O <sub>3</sub> CHO + .5 NO <sub>2</sub> + .5 NBZFUONE + .5 HO <sub>2</sub>                                                                   | k1_R02s0R02                              | Rickard and Pascoe (2009)*                     |
| G44439  | TrGAroC  | MALDALCO <sub>2</sub> H + OH → .6 MALANHY + HO <sub>2</sub> + .4 GLYOX + .4 CO + .4 CO <sub>2</sub>                                                                                    | 3.70E-11                                 | Rickard and Pascoe (2009)*                     |
| G44440  | TrGAroCN | EPXC <sub>4</sub> DIAL + NO <sub>3</sub> → EPXDLCO <sub>3</sub> + HNO <sub>3</sub>                                                                                                     | 2*KN03AL*4.0                             | Rickard and Pascoe (2009)                      |

Table 1: Gas phase reactions (... continued)

| #       | labels   | reaction                                                                                                              | rate coefficient                         | reference                                      |
|---------|----------|-----------------------------------------------------------------------------------------------------------------------|------------------------------------------|------------------------------------------------|
| G44441  | TrGAroC  | EPXC4DIAL + OH $\rightarrow$ EPXDLCO3                                                                                 | 4.32E-11                                 | Rickard and Pascoe (2009)                      |
| G44442a | TrGAroC  | MECOACETO2 + HO <sub>2</sub> $\rightarrow$ MECOACEOOH                                                                 | KR02H02(4)*(1-rcoch2o2_oh)               | Rickard and Pascoe (2009), Taraborrelli (2016) |
| G44442b | TrGAroC  | MECOACETO2 + HO <sub>2</sub> $\rightarrow$ CH <sub>3</sub> C(O)OO + HCHO + CO <sub>2</sub> + OH                       | KR02H02(4)*rcoch2o2_oh                   | Rickard and Pascoe (2009), Taraborrelli (2016) |
| G44443  | TrGAroCN | MECOACETO2 + NO $\rightarrow$ CH <sub>3</sub> C(O)OO + HCHO + CO <sub>2</sub> + NO <sub>2</sub>                       | KR02N0                                   | Rickard and Pascoe (2009)*                     |
| G44444  | TrGAroCN | MECOACETO2 + NO <sub>3</sub> $\rightarrow$ CH <sub>3</sub> C(O)OO + HCHO + CO <sub>2</sub> + NO <sub>2</sub>          | KR02N03                                  | Rickard and Pascoe (2009)*                     |
| G44445  | TrGAroC  | MECOACETO2 $\rightarrow$ CH <sub>3</sub> C(O)OO + HCHO + CO <sub>2</sub>                                              | k1_R02p0R02                              | Rickard and Pascoe (2009)*                     |
| G44446  | TrGAroCN | CO14O3CHO + NO <sub>3</sub> $\rightarrow$ CO + HCOCH <sub>2</sub> O <sub>2</sub> + CO <sub>2</sub> + HNO <sub>3</sub> | KN03AL*8.0                               | Rickard and Pascoe (2009)                      |
| G44447  | TrGAroC  | CO14O3CHO + OH $\rightarrow$ CO + HCOCH <sub>2</sub> O <sub>2</sub> + CO <sub>2</sub>                                 | 3.44E-11                                 | Rickard and Pascoe (2009)                      |
| G44448  | TrGAroCN | NBZFUONE + OH $\rightarrow$ BZFUCO + NO <sub>2</sub>                                                                  | 1.16E-12                                 | Rickard and Pascoe (2009)                      |
| G44449a | TrGAroC  | BZFUO2 + HO <sub>2</sub> $\rightarrow$ BZFUOOH                                                                        | KR02H02(4)*(1-rcoch2o2_oh-rchohch2o2_oh) | Rickard and Pascoe (2009), Taraborrelli (2016) |
| G44449b | TrGAroC  | BZFUO2 + HO <sub>2</sub> $\rightarrow$ CO14O3CHO + HO <sub>2</sub> + OH                                               | KR02H02(4)*(rcoch2o2_oh+rchohch2o2_oh)   | Rickard and Pascoe (2009), Taraborrelli (2016) |
| G44450  | TrGAroCN | BZFUO2 + NO $\rightarrow$ CO14O3CHO + HO <sub>2</sub> + NO <sub>2</sub>                                               | KR02N0                                   | Rickard and Pascoe (2009)*                     |
| G44451  | TrGAroCN | BZFUO2 + NO <sub>3</sub> $\rightarrow$ CO14O3CHO + HO <sub>2</sub> + NO <sub>2</sub>                                  | KR02N03                                  | Rickard and Pascoe (2009)*                     |
| G44452  | TrGAroC  | BZFUO2 $\rightarrow$ CO14O3CHO + HO <sub>2</sub>                                                                      | k1_R02s0R02                              | Rickard and Pascoe (2009)*                     |
| G44453  | TrGAroC  | BZFUCO + OH $\rightarrow$ CO14O3CHO + HO <sub>2</sub>                                                                 | 1.78E-11                                 | Rickard and Pascoe (2009)                      |
| G44456a | TrGAroC  | MALDIALO2 + HO <sub>2</sub> $\rightarrow$ MALDIALOOH                                                                  | KR02H02(4)*(1-rcoch2o2_oh-rchohch2o2_oh) | Rickard and Pascoe (2009)                      |
| G44456b | TrGAroC  | MALDIALO2 + HO <sub>2</sub> $\rightarrow$ GLYOX + GLYOX + HO <sub>2</sub> + OH                                        | KR02H02(4)*(rcoch2o2_oh+rchohch2o2_oh)   | Rickard and Pascoe (2009)                      |
| G44457  | TrGAroCN | MALDIALO2 + NO $\rightarrow$ GLYOX + GLYOX + HO <sub>2</sub> + NO <sub>2</sub>                                        | KR02N0                                   | Rickard and Pascoe (2009)*                     |
| G44458  | TrGAroCN | MALDIALO2 + NO <sub>3</sub> $\rightarrow$ GLYOX + GLYOX + HO <sub>2</sub> + NO <sub>2</sub>                           | KR02N03                                  | Rickard and Pascoe (2009)*                     |
| G44459  | TrGAroC  | MALDIALO2 $\rightarrow$ GLYOX + GLYOX + HO <sub>2</sub>                                                               | k1_R02s0R02                              | Rickard and Pascoe (2009)*                     |
| G44460  | TrGAroCN | EPXDLPAN + OH $\rightarrow$ HCOCOCHO + CO + NO <sub>2</sub>                                                           | 2.29E-11                                 | Rickard and Pascoe (2009)                      |
| G44461  | TrGAroCN | EPXDLPAN $\rightarrow$ EPXDLCO3 + NO <sub>2</sub>                                                                     | k_PAN_M                                  | Rickard and Pascoe (2009)*                     |
| G44462  | TrGAroC  | MECOACEOOH + OH $\rightarrow$ MECOACETO2                                                                              | 3.59E-12                                 | Rickard and Pascoe (2009)                      |

Table 1: Gas phase reactions (... continued)

| #       | labels | reaction                                                                                                                                                                                                                                                                                                                                                                                                                                                             | rate coefficient                                                                                                | reference                                                          |
|---------|--------|----------------------------------------------------------------------------------------------------------------------------------------------------------------------------------------------------------------------------------------------------------------------------------------------------------------------------------------------------------------------------------------------------------------------------------------------------------------------|-----------------------------------------------------------------------------------------------------------------|--------------------------------------------------------------------|
| G45000  | TrGC   | $\text{C}_5\text{H}_8 + \text{O}_3 \rightarrow .3508 \text{ MACR} + .01518 \text{ MACO2H} + .2440 \text{ MVK} + .7085 \text{ HCHO} + .11 \text{ CH}_2\text{OO} + .1275 \text{ C}_3\text{H}_6 + .1575 \text{ CH}_3\text{C(O)} + .0510 \text{ CH}_3 + .2625 \text{ HO}_2 + .27 \text{ OH} + .09482 \text{ H}_2\text{O}_2 + .255 \text{ CO}_2 + .522 \text{ CO} + .07182 \text{ HCHO} + .03618 \text{ HCOCH}_2\text{O}_2 + .01782 \text{ CO} + 0.05408 \text{ LCARBON}$ | $1.03\text{E-}14 \cdot \text{EXP}(-1995./\text{temp})$                                                          | Atkinson et al. (2006), Taraborrelli (2016)                        |
| G45001  | TrGC   | $\text{C}_5\text{H}_8 + \text{OH} \rightarrow .63 \text{ ISOPAB} + .30 \text{ ISOPCD} + .07 \text{ LISOPEFO2}$                                                                                                                                                                                                                                                                                                                                                       | $2.7\text{E-}11 \cdot \text{EXP}(390./\text{temp})$                                                             | Atkinson et al. (2006), Taraborrelli (2016)                        |
| G45002  | TrGCN  | $\text{C}_5\text{H}_8 + \text{NO}_3 \rightarrow \text{NISOP O2}$                                                                                                                                                                                                                                                                                                                                                                                                     | $3.0\text{E-}12 \cdot \text{EXP}(-450./\text{temp})$                                                            | Atkinson et al. (2006)                                             |
| G45003a | TrGC   | $\text{ISOPAB} + \text{O}_2 \rightarrow \text{LISOPACO2}$                                                                                                                                                                                                                                                                                                                                                                                                            | $5.530\text{E-}13$                                                                                              | Taraborrelli (2016)                                                |
| G45003b | TrGC   | $\text{ISOPAB} + \text{O}_2 \rightarrow \text{ISOPBO2}$                                                                                                                                                                                                                                                                                                                                                                                                              | $3.\text{E-}12$                                                                                                 | Taraborrelli (2016)                                                |
| G45004a | TrGC   | $\text{ISOPCD} + \text{O}_2 \rightarrow \text{LDISOPACO2}$                                                                                                                                                                                                                                                                                                                                                                                                           | $6.780\text{E-}13$                                                                                              | Taraborrelli (2016)                                                |
| G45004b | TrGC   | $\text{ISOPCD} + \text{O}_2 \rightarrow \text{ISOPDO2}$                                                                                                                                                                                                                                                                                                                                                                                                              | $3.\text{E-}12$                                                                                                 | Taraborrelli (2016)                                                |
| G45005  | TrGC   | $\text{LISOPACO2} \rightarrow \text{ISOPAB} + \text{O}_2$                                                                                                                                                                                                                                                                                                                                                                                                            | $3.1\text{E}12 \cdot \exp(-7900./\text{temp}) \cdot .6 + 7.8\text{E}13 \cdot \exp(-8600./\text{temp}) \cdot .4$ | Taraborrelli (2016)                                                |
| G45006  | TrGC   | $\text{ISOPBO2} \rightarrow \text{ISOPAB} + \text{O}_2$                                                                                                                                                                                                                                                                                                                                                                                                              | $3.7\text{E}14 \cdot \exp(-9570./\text{temp}) + 4.2\text{E}14 \cdot \exp(-9970./\text{temp})$                   | Taraborrelli (2016)                                                |
| G45007  | TrGC   | $\text{LDISOPACO2} \rightarrow \text{ISOPCD} + \text{O}_2$                                                                                                                                                                                                                                                                                                                                                                                                           | $5.65\text{E}12 \cdot \exp(-8410./\text{temp}) + 4.2 + 1.4\text{E}14 \cdot \exp(-9110./\text{temp}) \cdot .58$  | Taraborrelli (2016)                                                |
| G45008  | TrGC   | $\text{ISOPDO2} \rightarrow \text{ISOPCD} + \text{O}_2$                                                                                                                                                                                                                                                                                                                                                                                                              | $5.0\text{E}14 \cdot \exp(-10120./\text{temp}) + 8.25\text{E}14 \cdot \exp(-10220./\text{temp})$                | Taraborrelli (2016)                                                |
| G45009a | TrGC   | $\text{LISOPACO2} \rightarrow \text{C1ODC2O2C4OOH}$                                                                                                                                                                                                                                                                                                                                                                                                                  | $\text{K16HSZ14} * 2./3. * (1 - \text{fhpal})$                                                                  | Taraborrelli (2016)                                                |
| G45009b | TrGC   | $\text{LISOPACO2} \rightarrow \text{ZCODC23DBCOOH} + \text{HO}_2$                                                                                                                                                                                                                                                                                                                                                                                                    | $\text{K16HSZ14} * (2./3. * \text{fhpal} + 1./3.)$                                                              | Taraborrelli (2016)                                                |
| G45010a | TrGC   | $\text{LDISOPACO2} \rightarrow \text{C1OOHC3O2C4OD}$                                                                                                                                                                                                                                                                                                                                                                                                                 | $\text{k16HSZ41} * 2./3. * (1 - \text{fhpal})$                                                                  | Taraborrelli (2016)                                                |
| G45010b | TrGC   | $\text{LDISOPACO2} \rightarrow \text{ZCODC23DBCOOH} + \text{HO}_2$                                                                                                                                                                                                                                                                                                                                                                                                   | $\text{k16HSZ41} * (2./3. * \text{fhpal} + 1./3.)$                                                              | Taraborrelli (2016)                                                |
| G45011  | TrGC   | $\text{LISOPACO2} \rightarrow .9 \text{ LISOPACO} + .1 \text{ ISOPAOH}$                                                                                                                                                                                                                                                                                                                                                                                              | $\text{k1\_R02LISOPACO2}$                                                                                       | Rickard and Pascoe (2009), Taraborrelli (2016)                     |
| G45012  | TrGC   | $\text{LISOPACO2} + \text{HO}_2 \rightarrow \text{LISOPACOOH}$                                                                                                                                                                                                                                                                                                                                                                                                       | $\text{KR02H02}(5)$                                                                                             | Rickard and Pascoe (2009)                                          |
| G45013a | TrGCN  | $\text{LISOPACO2} + \text{NO} \rightarrow \text{LISOPACO} + \text{NO}_2$                                                                                                                                                                                                                                                                                                                                                                                             | $\text{KR02N0} * (1 - \alpha_{\text{AN}}(6, 1, 0, 0, 0, \text{temp}, \text{cair}))$                             | Lockwood et al. (2010), Paulot et al. (2009a), Taraborrelli (2016) |
| G45013b | TrGCN  | $\text{LISOPACO2} + \text{NO} \rightarrow \text{LISOPACNO3}$                                                                                                                                                                                                                                                                                                                                                                                                         | $\text{KR02N0} * \alpha_{\text{AN}}(6, 1, 0, 0, 0, \text{temp}, \text{cair})$                                   | Lockwood et al. (2010), Paulot et al. (2009a), Taraborrelli (2016) |
| G45014  | TrGCN  | $\text{LISOPACO2} + \text{NO}_3 \rightarrow \text{LISOPACO} + \text{NO}_2$                                                                                                                                                                                                                                                                                                                                                                                           | $\text{KR02N03}$                                                                                                | Rickard and Pascoe (2009)                                          |

Table 1: Gas phase reactions (... continued)

| #       | labels | reaction                                                                                                                                                                                                                                                                                                           | rate coefficient                                        | reference                                                          |
|---------|--------|--------------------------------------------------------------------------------------------------------------------------------------------------------------------------------------------------------------------------------------------------------------------------------------------------------------------|---------------------------------------------------------|--------------------------------------------------------------------|
| G45015  | TrGC   | LDISOPACO2 $\rightarrow$ .9 LISOPACO + .1 ISOPAOH                                                                                                                                                                                                                                                                  | k1_R02LISOPACO2                                         | Rickard and Pascoe (2009), Taraborrelli (2016)                     |
| G45016  | TrGC   | LDISOPACO2 + HO <sub>2</sub> $\rightarrow$ LISOPACOOH                                                                                                                                                                                                                                                              | KR02H02(5)                                              | Rickard and Pascoe (2009)                                          |
| G45017a | TrGCN  | LDISOPACO2 + NO $\rightarrow$ LISOPACO + NO <sub>2</sub>                                                                                                                                                                                                                                                           | KR02N0*(1.-alpha_AN(6,1,0,0,0, temp, cair))             | Lockwood et al. (2010), Paulot et al. (2009a), Taraborrelli (2016) |
| G45017b | TrGCN  | LDISOPACO2 + NO $\rightarrow$ LISOPACNO3                                                                                                                                                                                                                                                                           | KR02N0*alpha_AN(6,1,0,0,0, temp, cair)                  | Lockwood et al. (2010), Paulot et al. (2009a), Taraborrelli (2016) |
| G45018  | TrGCN  | LDISOPACO2 + NO <sub>3</sub> $\rightarrow$ LISOPACO + NO <sub>2</sub>                                                                                                                                                                                                                                              | KR02N03                                                 | Rickard and Pascoe (2009)                                          |
| G45019a | TrGC   | LISOPACOOH + OH $\rightarrow$ LISOPACO2                                                                                                                                                                                                                                                                            | 0.6*k_CH300H_OH                                         | Taraborrelli (2016)                                                |
| G45019b | TrGC   | LISOPACOOH + OH $\rightarrow$ ZCODC23DBCOOH + HO <sub>2</sub>                                                                                                                                                                                                                                                      | k_s*f_allyl*f_soh                                       | Taraborrelli (2016)                                                |
| G45019c | TrGC   | LISOPACOOH + OH $\rightarrow$ LHC4ACCHO + OH                                                                                                                                                                                                                                                                       | (k_s*f_soh*f_allyl+ k_rohro)                            | Taraborrelli (2016)                                                |
| G45019d | TrGC   | LISOPACOOH + OH $\rightarrow$ LIEPOX + OH                                                                                                                                                                                                                                                                          | (k_adt+k_ads)*a_ch2oh*a_ch2ooh                          | Taraborrelli (2016)*                                               |
| G45020  | TrGC   | ISOPAOH + OH $\rightarrow$ LHC4ACCHO + HO <sub>2</sub>                                                                                                                                                                                                                                                             | (k_adt+k_ads)*a_ch2oh*a_ch2oh+k_s*f_soh*f_allyl+k_rohro | Taraborrelli (2016)                                                |
| G45021  | TrGCN  | LISOPACNO3 + OH $\rightarrow$ LISOPACNO3O2                                                                                                                                                                                                                                                                         | (k_adt+k_ads)*a_ch2ono2*a_ch2oh                         | Taraborrelli (2016)*                                               |
| G45022  | TrGC   | ISOPBO2 $\rightarrow$ .8 MVK + .8 HCHO + .8 HO <sub>2</sub> + .2 ISOPBOH                                                                                                                                                                                                                                           | k1_R02ISOPBO2                                           | Rickard and Pascoe (2009)                                          |
| G45023a | TrGC   | ISOPBO2 + HO <sub>2</sub> $\rightarrow$ ISOPBOOH                                                                                                                                                                                                                                                                   | KR02H02(5)*(1.-rchohch2o2_oh)                           | Taraborrelli (2016)                                                |
| G45023b | TrGC   | ISOPBO2 + HO <sub>2</sub> $\rightarrow$ MVK + HCHO + HO <sub>2</sub> + OH                                                                                                                                                                                                                                          | KR02H02(5)*rchohch2o2_oh                                | Taraborrelli (2016)                                                |
| G45024a | TrGCN  | ISOPBO2 + NO $\rightarrow$ MVK + HCHO + HO <sub>2</sub> + NO <sub>2</sub>                                                                                                                                                                                                                                          | KR02N0*(1.-alpha_AN(6,3,0,0,0, temp, cair))             | Lockwood et al. (2010), Taraborrelli (2016)                        |
| G45024b | TrGCN  | ISOPBO2 + NO $\rightarrow$ ISOPBNO3                                                                                                                                                                                                                                                                                | KR02N0*alpha_AN(6,3,0,0,0, temp, cair)                  | Lockwood et al. (2010), Taraborrelli (2016)                        |
| G45025  | TrGCN  | ISOPBO2 + NO <sub>3</sub> $\rightarrow$ MVK + .75 HCHO + .75 HO <sub>2</sub> + .25 CH <sub>3</sub> + NO <sub>2</sub>                                                                                                                                                                                               | KR02N03                                                 | Rickard and Pascoe (2009)                                          |
| G45026a | TrGC   | ISOPBOOH + OH $\rightarrow$ LIEPOX + OH                                                                                                                                                                                                                                                                            | (k_ads+k_adp)*a_ch2ooh                                  | Paulot et al. (2009b), Taraborrelli (2016)                         |
| G45026b | TrGC   | ISOPBOOH + OH $\rightarrow$ ISOPBO2                                                                                                                                                                                                                                                                                | 0.6*k_CH300H_OH                                         | Taraborrelli (2016)                                                |
| G45026c | TrGC   | ISOPBOOH + OH $\rightarrow$ MGLYOX + HOCH <sub>2</sub> CHO                                                                                                                                                                                                                                                         | k_rohro+k_s*f_alk*f_soh                                 | Taraborrelli (2016)                                                |
| G45027  | TrGC   | ISOPBOOH + O <sub>3</sub> $\rightarrow$ .1368 MACROOH + .1368 H <sub>2</sub> O <sub>2</sub> + .2280 HO <sub>2</sub> + .4332 CH <sub>3</sub> COCH <sub>2</sub> OH + .2280 CO <sub>2</sub> + .6384 OH + .2052 CO + .57 HCHO + .43 MACROOH + .06880 HO <sub>2</sub> + .06880 OH + .2709 CO + .1591 CH <sub>2</sub> OO | 1.E-17                                                  | Taraborrelli (2016)                                                |

Table 1: Gas phase reactions (... continued)

| #       | labels | reaction                                                                                                                                                                                                                                                                           | rate coefficient                                                                                                                                                    | reference                                   |
|---------|--------|------------------------------------------------------------------------------------------------------------------------------------------------------------------------------------------------------------------------------------------------------------------------------------|---------------------------------------------------------------------------------------------------------------------------------------------------------------------|---------------------------------------------|
| G45028  | TrGC   | ISOPBOH + OH $\rightarrow$ MVK + .75 HCHO + .75 HO <sub>2</sub> + .25 CH <sub>3</sub>                                                                                                                                                                                              | $k_{\text{s}}*f_{\text{alk}}*f_{\text{soh}}+(k_{\text{adp}}+k_{\text{ads}})*a_{\text{ch2oh}}$                                                                       | Taraborrelli (2016)                         |
| G45029  | TrGCN  | ISOPBNO <sub>3</sub> + OH $\rightarrow$ ISOPBDNO <sub>3</sub> O <sub>2</sub>                                                                                                                                                                                                       | $(k_{\text{adt}}+k_{\text{adp}})*f_{\text{ch2ono2}}$                                                                                                                | Taraborrelli (2016)                         |
| G45030  | TrGC   | ISOPDO <sub>2</sub> $\rightarrow$ .8 MACR + .8 HCHO + .8 HO <sub>2</sub> + .1 HCOC <sub>5</sub> + .1 ISOPDOH                                                                                                                                                                       | k1_R02ISOPDO <sub>2</sub>                                                                                                                                           | Rickard and Pascoe (2009)                   |
| G45031a | TrGC   | ISOPDO <sub>2</sub> + HO <sub>2</sub> $\rightarrow$ ISOPDOOH                                                                                                                                                                                                                       | KR02H02(5)*(1.-rchohch2o2_oh)                                                                                                                                       | Taraborrelli (2016)                         |
| G45031b | TrGC   | ISOPDO <sub>2</sub> + HO <sub>2</sub> $\rightarrow$ MACR + HCHO + HO <sub>2</sub> + OH                                                                                                                                                                                             | KR02H02(5)*rchohch2o2_oh                                                                                                                                            | Taraborrelli (2016)                         |
| G45032a | TrGCN  | ISOPDO <sub>2</sub> + NO $\rightarrow$ MACR + HCHO + HO <sub>2</sub> + NO <sub>2</sub>                                                                                                                                                                                             | KR02N0*(1.-alpha_AN(6,2,0,0,0,temp,cair))                                                                                                                           | Lockwood et al. (2010), Taraborrelli (2016) |
| G45032b | TrGCN  | ISOPDO <sub>2</sub> + NO $\rightarrow$ ISOPDNO <sub>3</sub>                                                                                                                                                                                                                        | KR02N0*alpha_AN(6,2,0,0,0,temp,cair)                                                                                                                                | Lockwood et al. (2010), Taraborrelli (2016) |
| G45033  | TrGCN  | ISOPDO <sub>2</sub> + NO <sub>3</sub> $\rightarrow$ MACR + HCHO + HO <sub>2</sub> + NO <sub>2</sub>                                                                                                                                                                                | KR02N03                                                                                                                                                             | Rickard and Pascoe (2009)                   |
| G45034a | TrGC   | ISOPDOOH + OH $\rightarrow$ LIEPOX + OH                                                                                                                                                                                                                                            | $(k_{\text{adt}}+k_{\text{adp}})*a_{\text{ch2ooh}}$                                                                                                                 | Paulot et al. (2009b), Taraborrelli (2016)  |
| G45034b | TrGC   | ISOPDOOH + OH $\rightarrow$ ISOPDO <sub>2</sub>                                                                                                                                                                                                                                    | 0.6*k_CH300H_OH                                                                                                                                                     | Taraborrelli (2016)                         |
| G45034c | TrGC   | ISOPDOOH + OH $\rightarrow$ HCOC <sub>5</sub> + OH                                                                                                                                                                                                                                 | $k_{\text{t}}*f_{\text{tooh}}*f_{\text{allyl}}*f_{\text{pch2oh}}$                                                                                                   | Taraborrelli (2016)                         |
| G45034d | TrGC   | ISOPDOOH + OH $\rightarrow$ CH <sub>3</sub> COCH <sub>2</sub> OH + GLYOX + OH                                                                                                                                                                                                      | $k_{\text{s}}*f_{\text{pch2oh}}*f_{\text{soh}}$                                                                                                                     | Taraborrelli (2016)                         |
| G45035  | TrGC   | ISOPDOOH + O <sub>3</sub> $\rightarrow$ 1.393 OH + BIACETOH + .67 HCHO + .05280 HO <sub>2</sub> + .2079 CO + .1221 CH <sub>2</sub> OO                                                                                                                                              | 1.E-17                                                                                                                                                              | Taraborrelli (2016)                         |
| G45036  | TrGC   | ISOPDOH + OH $\rightarrow$ HCOC <sub>5</sub> + HO <sub>2</sub>                                                                                                                                                                                                                     | $2.*k_{\text{rohro}}+(k_{\text{t}}*f_{\text{toh}}*f_{\text{allyl}}+k_{\text{s}}*f_{\text{soh}})*f_{\text{pch2oh}}+(k_{\text{adt}}+k_{\text{adp}})*a_{\text{ch2oh}}$ | Taraborrelli (2016)                         |
| G45037  | TrGCN  | ISOPDNO <sub>3</sub> + OH $\rightarrow$ ISOPBDNO <sub>3</sub> O <sub>2</sub>                                                                                                                                                                                                       | $(k_{\text{adp}}+k_{\text{ads}})*a_{\text{ch2ono2}}$                                                                                                                | Taraborrelli (2016)*                        |
| G45038  | TrGCN  | NISOPO <sub>2</sub> $\rightarrow$ .8 NC <sub>4</sub> CHO + .6 HO <sub>2</sub> + .2 LISOPACNO <sub>3</sub>                                                                                                                                                                          | k1_R02LISOPAC0 <sub>2</sub>                                                                                                                                         | Rickard and Pascoe (2009)                   |
| G45039  | TrGCN  | NISOPO <sub>2</sub> + HO <sub>2</sub> $\rightarrow$ NISOPOOH                                                                                                                                                                                                                       | KR02H02(5)                                                                                                                                                          | Rickard and Pascoe (2009)                   |
| G45040  | TrGCN  | NISOPO <sub>2</sub> + NO $\rightarrow$ NC <sub>4</sub> CHO + HO <sub>2</sub> + NO <sub>2</sub>                                                                                                                                                                                     | KR02N0                                                                                                                                                              | Rickard and Pascoe (2009)*                  |
| G45041  | TrGCN  | NISOPO <sub>2</sub> + NO <sub>3</sub> $\rightarrow$ NC <sub>4</sub> CHO + HO <sub>2</sub> + NO <sub>2</sub>                                                                                                                                                                        | KR02N03                                                                                                                                                             | Rickard and Pascoe (2009)                   |
| G45042  | TrGCN  | NISOPOOH + OH $\rightarrow$ NC <sub>4</sub> CHO + OH                                                                                                                                                                                                                               | 1.03E-10                                                                                                                                                            | Rickard and Pascoe (2009)                   |
| G45043  | TrGCN  | NC <sub>4</sub> CHO + OH $\rightarrow$ LNISO <sub>3</sub>                                                                                                                                                                                                                          | $(k_{\text{adt}}+k_{\text{ads}})*a_{\text{cho}}*a_{\text{ch2ono2}}$                                                                                                 | Taraborrelli (2016)*                        |
| G45044  | TrGCN  | NC <sub>4</sub> CHO + O <sub>3</sub> $\rightarrow$ .27 NOA + .027 HCOCO <sub>2</sub> H + .0162 GLYOX + .0162 H <sub>2</sub> O <sub>2</sub> + .1458 HCOCO + .0405 HCOOH + .0405 CO + .8758 OH + .365 MGLYOX + .73 NO <sub>2</sub> + 0.7705 HCHO + .4055 CO <sub>2</sub> + .73 GLYOX | 2.40E-17                                                                                                                                                            | Taraborrelli (2016)                         |
| G45045  | TrGCN  | NC <sub>4</sub> CHO + NO <sub>3</sub> $\rightarrow$ LNISO <sub>3</sub> + HNO <sub>3</sub>                                                                                                                                                                                          | KN03AL*4.25                                                                                                                                                         | Rickard and Pascoe (2009)                   |
| G45046  | TrGCN  | LNISO <sub>3</sub> + HO <sub>2</sub> $\rightarrow$ LNISOOH                                                                                                                                                                                                                         | .5*KR02H02(5) + .5*KAPH02                                                                                                                                           | Rickard and Pascoe (2009)                   |

Table 1: Gas phase reactions (... continued)

| #       | labels | reaction                                                                                                                                                                                                                                                                                                                                                                                     | rate coefficient                                                                                            | reference                  |
|---------|--------|----------------------------------------------------------------------------------------------------------------------------------------------------------------------------------------------------------------------------------------------------------------------------------------------------------------------------------------------------------------------------------------------|-------------------------------------------------------------------------------------------------------------|----------------------------|
| G45047  | TrGCN  | $\text{LNISO}_3 + \text{NO} \rightarrow \text{NOA} + .5 \text{HOCHCHO} + .5 \text{CO} + .5 \text{HO}_2 + \text{NO}_2 + .5 \text{CO}_2$                                                                                                                                                                                                                                                       | $.5 * \text{KAPNO} + .5 * \text{KR02NO}$                                                                    | Rickard and Pascoe (2009)* |
| G45048  | TrGCN  | $\text{LNISO}_3 + \text{NO}_3 \rightarrow \text{NOA} + .5 \text{HOCHCHO} + .5 \text{CO} + .5 \text{HO}_2 + \text{NO}_2 + .5 \text{CO}_2$                                                                                                                                                                                                                                                     | $1.3 * \text{KR02NO3}$                                                                                      | Rickard and Pascoe (2009)  |
| G45049  | TrGCN  | $\text{LNISOOH} + \text{OH} \rightarrow \text{LNISO}_3$                                                                                                                                                                                                                                                                                                                                      | $2.65\text{E}-11$                                                                                           | Rickard and Pascoe (2009)  |
| G45050a | TrGC   | $\text{LHC4ACCHO} + \text{OH} \rightarrow \text{LC578O2}$                                                                                                                                                                                                                                                                                                                                    | $(\text{k\_adtertprim} + \text{k\_ads}) * \text{a\_cho} * \text{a\_ch2oh}$                                  | Taraborrelli (2016)        |
| G45050b | TrGC   | $\text{LHC4ACCHO} + \text{OH} \rightarrow \text{LHC4ACCO3}$                                                                                                                                                                                                                                                                                                                                  | $\text{k\_t*f\_o}$                                                                                          | Taraborrelli (2016)        |
| G45050c | TrGC   | $\text{LHC4ACCHO} + \text{OH} \rightarrow \text{ZCODC23DBCOD} + \text{HO}_2$                                                                                                                                                                                                                                                                                                                 | $\text{k\_s*f\_soh*f\_allyl}$                                                                               | Taraborrelli (2016)        |
| G45051  | TrGC   | $\text{LHC4ACCHO} + \text{O}_3 \rightarrow .2225 \text{CH}_3\text{C}(\text{O}) + .89 \text{CO} + .0171875 \text{HOCH}_2\text{CO}_2\text{H} + .075625 \text{H}_2\text{O}_2 + .0171875 \text{HCOCO}_2\text{H} + .2775 \text{CH}_3\text{COCH}_2\text{OH} + .6675 \text{HO}_2 + .2603125 \text{GLYOX} + .2225 \text{HCHO} + .89 \text{OH} + .2603125 \text{HOCH}_2\text{CHO} + .5 \text{MGLYOX}$ | $2.40\text{E}-17$                                                                                           | Rickard and Pascoe (2009)  |
| G45052  | TrGCN  | $\text{LHC4ACCHO} + \text{NO}_3 \rightarrow \text{LHC4ACCO3} + \text{HNO}_3$                                                                                                                                                                                                                                                                                                                 | $\text{KN03AL} * 4.25$                                                                                      | Rickard and Pascoe (2009)  |
| G45053  | TrGC   | $\text{LC578O2} \rightarrow .25 \text{CH}_3\text{COCH}_2\text{OH} + .75 \text{MGLYOX} + .25 \text{HOCHCHO} + .75 \text{HOCH}_2\text{CHO} + .75 \text{HO}_2$                                                                                                                                                                                                                                  | $\text{k1\_R02t0R02}$                                                                                       | Rickard and Pascoe (2009)  |
| G45054a | TrGC   | $\text{LC578O2} + \text{HO}_2 \rightarrow \text{MGLYOX} + \text{HOCH}_2\text{CHO} + \text{OH}$                                                                                                                                                                                                                                                                                               | $\text{KR02H02}(5) * \text{rcoch2o2\_oh}$                                                                   | Rickard and Pascoe (2009)  |
| G45054b | TrGC   | $\text{LC578O2} + \text{HO}_2 \rightarrow \text{LC578OOH}$                                                                                                                                                                                                                                                                                                                                   | $\text{KR02H02}(5) * \text{rcoch2o2\_ooh}$                                                                  | Rickard and Pascoe (2009)  |
| G45055  | TrGCN  | $\text{LC578O2} + \text{NO} \rightarrow .25 \text{CH}_3\text{COCH}_2\text{OH} + .75 \text{MGLYOX} + .25 \text{HOCHCHO} + .75 \text{HOCH}_2\text{CHO} + .75 \text{HO}_2 + \text{NO}_2$                                                                                                                                                                                                        | $\text{KR02NO}$                                                                                             | Rickard and Pascoe (2009)* |
| G45056  | TrGCN  | $\text{LC578O2} + \text{NO}_3 \rightarrow .25 \text{CH}_3\text{COCH}_2\text{OH} + .75 \text{MGLYOX} + .25 \text{HOCHCHO} + .75 \text{HOCH}_2\text{CHO} + .75 \text{HO}_2 + \text{NO}_2$                                                                                                                                                                                                      | $\text{KR02NO3}$                                                                                            | Rickard and Pascoe (2009)  |
| G45057  | TrGC   | $\text{LC578O2} \rightarrow .25 \text{CH}_3\text{COCH}_2\text{OH} + .75 \text{MGLYOX} + .25 \text{HOCH}_2\text{CHO} + .75 \text{HOCH}_2\text{CHO} + \text{HO}_2 + \text{OH}$                                                                                                                                                                                                                 | $\text{KHSB}$                                                                                               | Taraborrelli (2016)        |
| G45058a | TrGC   | $\text{LC578OOH} + \text{OH} \rightarrow \text{LC578O2}$                                                                                                                                                                                                                                                                                                                                     | $0.6 * \text{k\_CH300H\_OH}$                                                                                | Taraborrelli (2016)        |
| G45058b | TrGC   | $\text{LC578OOH} + \text{OH} \rightarrow \text{C1ODC2OOHC4OD} + \text{HO}_2$                                                                                                                                                                                                                                                                                                                 | $\text{k\_t*f\_o*f\_tch2oh*f\_alk} + \text{k\_t*f\_toh*f\_pch2oh*f\_pch2oh} + \text{k\_s*f\_soh*f\_pch2oh}$ | Taraborrelli (2016)        |
| G45059a | TrGC   | $\text{LHC4ACCO3} \rightarrow \text{OH} + .5 \text{MACRO2} + .5 \text{LHMKABO2} + \text{CO}_2$                                                                                                                                                                                                                                                                                               | $\text{k1\_R02RC03} * 0.9$                                                                                  | Taraborrelli (2016)        |
| G45059b | TrGC   | $\text{LHC4ACCO3} \rightarrow \text{LHC4ACCO2H}$                                                                                                                                                                                                                                                                                                                                             | $\text{k1\_R02RC03} * 0.1$                                                                                  | Taraborrelli (2016)        |
| G45060a | TrGC   | $\text{LHC4ACCO3} + \text{HO}_2 \rightarrow 2 \text{OH} + .5 \text{MACRO2} + .5 \text{LHMKABO2} + \text{CO}_2$                                                                                                                                                                                                                                                                               | $\text{KAPH02*rco3\_oh}$                                                                                    | Taraborrelli (2016)        |
| G45060b | TrGC   | $\text{LHC4ACCO3} + \text{HO}_2 \rightarrow \text{LHC4ACCO3H}$                                                                                                                                                                                                                                                                                                                               | $\text{KAPH02*rco3\_ooh}$                                                                                   | Taraborrelli (2016)        |

Table 1: Gas phase reactions (... continued)

| #       | labels | reaction                                                                                                                                                                     | rate coefficient                                                            | reference                                                        |
|---------|--------|------------------------------------------------------------------------------------------------------------------------------------------------------------------------------|-----------------------------------------------------------------------------|------------------------------------------------------------------|
| G45060c | TrGC   | $\text{LHC4ACCO3} + \text{HO}_2 \rightarrow \text{LHC4ACCO2H} + \text{O}_3$                                                                                                  | $\text{KAPH02*rc03\_o3}$                                                    | Taraborrelli (2016)                                              |
| G45061  | TrGCN  | $\text{LHC4ACCO3} + \text{NO} \rightarrow .5 \text{ MACRO2} + .5 \text{ LHMVKABO2} + \text{NO}_2 + \text{CO}_2$                                                              | KAPN0                                                                       | Taraborrelli (2016)                                              |
| G45062  | TrGCN  | $\text{LHC4ACCO3} + \text{NO}_2 \rightarrow \text{LC5PAN1719}$                                                                                                               | $\text{k\_CH3CO3\_NO2}$                                                     | Rickard and Pascoe (2009)                                        |
| G45063  | TrGCN  | $\text{LHC4ACCO3} + \text{NO}_3 \rightarrow .5 \text{ MACRO2} + .5 \text{ LHMVKABO2} + \text{NO}_2 + \text{CO}_2$                                                            | $1.6*\text{KR02NO3}$                                                        | Taraborrelli (2016)                                              |
| G45064a | TrGC   | $\text{LHC4ACCO2H} + \text{OH} \rightarrow \text{OH} + .5 \text{ MACRO2} + .5 \text{ LHMVKABO2} + \text{CO}_2$                                                               | $2.52\text{E-}11$                                                           | Taraborrelli (2016)                                              |
| G45064b | TrGC   | $\text{LHC4ACCO3H} + \text{OH} \rightarrow \text{LHC4ACCO3}$                                                                                                                 | $2.88\text{E-}11$                                                           | Rickard and Pascoe (2009)                                        |
| G45065  | TrGCN  | $\text{LC5PAN1719} \rightarrow \text{LHC4ACCO3} + \text{NO}_2$                                                                                                               | $\text{k\_PAN\_M}$                                                          | Rickard and Pascoe (2009)                                        |
| G45066  | TrGCN  | $\text{LC5PAN1719} + \text{OH} \rightarrow .5 \text{ MACROH} + .5 \text{ HO12CO3C4} + \text{CO} + \text{NO}_2$                                                               | $2.52\text{E-}11$                                                           | Rickard and Pascoe (2009)                                        |
| G45067  | TrGC   | $\text{HCOC5} + \text{OH} \rightarrow \text{C59O2}$                                                                                                                          | $3.81\text{E-}11$                                                           | Rickard and Pascoe (2009)                                        |
| G45068  | TrGC   | $\text{HCOC5} + \text{O}_3 \rightarrow \text{BIACETOH} + .335 \text{ H}_2\text{O}_2 + .67 \text{ HCHO} + .2079 \text{ CO} + .1221 \text{ CH}_2\text{OO} + .05280 \text{ OH}$ | $7.51\text{E-}16*\text{EXP}(-1521./\text{temp})$                            | Taraborrelli (2016)                                              |
| G45069  | TrGC   | $\text{C59O2} \rightarrow \text{CH}_3\text{COCH}_2\text{OH} + \text{HOCH}_2\text{CO}$                                                                                        | $\text{k1\_R02t0R02}$                                                       | Taraborrelli (2016)                                              |
| G45070a | TrGC   | $\text{C59O2} + \text{HO}_2 \rightarrow \text{OH} + \text{CH}_3\text{COCH}_2\text{OH} + \text{HOCH}_2\text{CO}$                                                              | $\text{KR02H02(5)*rcoch2o2\_oh}$                                            | Taraborrelli (2016)                                              |
| G45070b | TrGC   | $\text{C59O2} + \text{HO}_2 \rightarrow \text{C59OOH}$                                                                                                                       | $\text{KR02H02(5)*rcoch2o2\_ooh}$                                           | Taraborrelli (2016)                                              |
| G45071  | TrGCN  | $\text{C59O2} + \text{NO} \rightarrow \text{CH}_3\text{COCH}_2\text{OH} + \text{HOCH}_2\text{CO} + \text{NO}_2$                                                              | $\text{KR02NO}$                                                             | Taraborrelli (2016)*                                             |
| G45072  | TrGCN  | $\text{C59O2} + \text{NO}_3 \rightarrow \text{CH}_3\text{COCH}_2\text{OH} + \text{HOCH}_2\text{CO} + \text{NO}_2$                                                            | $\text{KR02NO3}$                                                            | Taraborrelli (2016)                                              |
| G45073  | TrGC   | $\text{C59OOH} + \text{OH} \rightarrow \text{C59O2}$                                                                                                                         | $9.7\text{E-}12$                                                            | Rickard and Pascoe (2009)                                        |
| G45074  | TrGC   | $\text{LIEPOX} + \text{OH} \rightarrow \text{DB1O2} + \text{H}_2\text{O}$                                                                                                    | $5.78\text{E-}11*\text{EXP}(-400./\text{temp}) * (1.52/3.+0.98*2./3.)/1.51$ | Paulot et al. (2009b), Bates et al. (2014), Taraborrelli (2016)* |
| G45075  | TrGC   | $\text{ISOPBO2} \rightarrow \text{MVK} + \text{HCHO} + \text{OH}$                                                                                                            | KHSB                                                                        | Taraborrelli (2016)                                              |
| G45076  | TrGC   | $\text{ISOPDO2} \rightarrow \text{MACR} + \text{HCHO} + \text{OH}$                                                                                                           | KHSD                                                                        | Taraborrelli (2016)                                              |
| G45077a | TrGC   | $\text{ZCODC23DBCOOH} + \text{OH} \rightarrow .6 \text{ C1ODC2O2C4OOH} + .4 \text{ C1OOHC2O2C4OD}$                                                                           | $\text{k\_adt*a\_cho*a\_ch2ooh}$                                            | Taraborrelli (2016)                                              |
| G45077b | TrGC   | $\text{ZCODC23DBCOOH} + \text{OH} \rightarrow .6 \text{ C1ODC3O2C4OOH} + .4 \text{ C1OOHC3O2C4OD}$                                                                           | $\text{k\_ads*a\_cho*a\_ch2ooh}$                                            | Taraborrelli (2016)                                              |
| G45077c | TrGC   | $\text{ZCODC23DBCOOH} + \text{OH} \rightarrow \text{ZCO3HC23DBCOD}$                                                                                                          | $\text{k\_t*f\_o*f\_alk}+0.6*\text{k\_CH300H\_OH}$                          | Taraborrelli (2016)                                              |
| G45077d | TrGC   | $\text{ZCODC23DBCOOH} + \text{OH} \rightarrow \text{ZCODC23DBCOD} + \text{OH}$                                                                                               | $\text{k\_s*f\_sooh*f\_allyl}$                                              | Taraborrelli (2016)                                              |

Table 1: Gas phase reactions (... continued)

| #       | labels | reaction                                                                                                                                                                                                                                                                                                                                                                                                                                                                                                                                                                                                                                                                                                                                                                 | rate coefficient                       | reference            |
|---------|--------|--------------------------------------------------------------------------------------------------------------------------------------------------------------------------------------------------------------------------------------------------------------------------------------------------------------------------------------------------------------------------------------------------------------------------------------------------------------------------------------------------------------------------------------------------------------------------------------------------------------------------------------------------------------------------------------------------------------------------------------------------------------------------|----------------------------------------|----------------------|
| G45078  | TrGC   | ZCODOC23DBCOOH + O <sub>3</sub> → .4672 OH + .2336 HCOCOCH <sub>2</sub> O <sub>2</sub> + .2336 CO + .2336 CH <sub>3</sub> C(O) + .4672 HOOCH <sub>2</sub> CHO + .1728 MGLYOX + .1901 OH + .0864 GLYOX + .02765 HOOCH <sub>2</sub> CHO + .02765 H <sub>2</sub> O <sub>2</sub> + .02592 CH <sub>3</sub> OOH + .02592 CO <sub>2</sub> + .01037 HCOCO + .01555 CH <sub>2</sub> OO + .01555 CO + .006908 HOOCH <sub>2</sub> CO <sub>3</sub> + .2628 OH + .1314 MGLYOX + .1314 OH + .1314 HCOCOCH <sub>2</sub> OOH + .2628 GLYOX + .0972 CH <sub>3</sub> COCH <sub>2</sub> O <sub>2</sub> H + .00972 HCOCO <sub>2</sub> H + .005832 GLYOX + .005832 H <sub>2</sub> O <sub>2</sub> + .05249 OH + .05249 HCOCO + .01458 HCHO + .01458 CO <sub>2</sub> + .01458 HCOOH + .01458 CO | 2.4E-17                                | Taraborrelli (2016)  |
| G45079  | TrGC   | C1OOHC2O2C4OD → .78 CH <sub>3</sub> COCH <sub>2</sub> O <sub>2</sub> H + .78 HOCHCHO + .22 CO <sub>2</sub> H <sub>3</sub> CHO + .22 HCHO + .22 OH                                                                                                                                                                                                                                                                                                                                                                                                                                                                                                                                                                                                                        | k1_R02t0R02                            | Taraborrelli (2016)  |
| G45080  | TrGCN  | C1OOHC2O2C4OD + NO → .78 CH <sub>3</sub> COCH <sub>2</sub> O <sub>2</sub> H + .78 HOCHCHO + .22 CO <sub>2</sub> H <sub>3</sub> CHO + .22 HCHO + .22 OH + NO <sub>2</sub>                                                                                                                                                                                                                                                                                                                                                                                                                                                                                                                                                                                                 | KR02N0                                 | Taraborrelli (2016)* |
| G45081a | TrGC   | C1OOHC2O2C4OD + HO <sub>2</sub> → C1OOHC2OOHC4OD                                                                                                                                                                                                                                                                                                                                                                                                                                                                                                                                                                                                                                                                                                                         | KR02H02(5)*rcoch2o2_ooh                | Taraborrelli (2016)  |
| G45081b | TrGC   | C1OOHC2O2C4OD + HO <sub>2</sub> → .78 CH <sub>3</sub> COCH <sub>2</sub> O <sub>2</sub> H + .78 HOCHCHO + .22 CO <sub>2</sub> H <sub>3</sub> CHO + .22 HCHO + 1.22 OH                                                                                                                                                                                                                                                                                                                                                                                                                                                                                                                                                                                                     | KR02H02(5)*rcoch2o2_oh                 | Taraborrelli (2016)  |
| G45082  | TrGC   | C1OOHC2O2C4OD → CH <sub>3</sub> COCH <sub>2</sub> O <sub>2</sub> H + GLYOX + OH                                                                                                                                                                                                                                                                                                                                                                                                                                                                                                                                                                                                                                                                                          | KHSB                                   | Taraborrelli (2016)  |
| G45083  | TrGC   | C1ODC2O2C4OOH → OH + C1ODC2OOHC4OD                                                                                                                                                                                                                                                                                                                                                                                                                                                                                                                                                                                                                                                                                                                                       | K15HSDHB                               | Taraborrelli (2016)  |
| G45084a | TrGC   | C1OOHC2OOHC4OD + OH → C1ODC2OOHC4OD + OH                                                                                                                                                                                                                                                                                                                                                                                                                                                                                                                                                                                                                                                                                                                                 | 2.*k_s*f_sooh*f_tch2oh                 | Taraborrelli (2016)  |
| G45084b | TrGC   | C1OOHC2OOHC4OD + OH → CH <sub>3</sub> COCH <sub>2</sub> O <sub>2</sub> H + 2 CO + 2 HO <sub>2</sub> + OH                                                                                                                                                                                                                                                                                                                                                                                                                                                                                                                                                                                                                                                                 | k_t*f_toh*f_pch2oh*f_pch2oh            | Taraborrelli (2016)  |
| G45084c | TrGC   | C1OOHC2OOHC4OD + OH → C1OOHC2O2C4OD                                                                                                                                                                                                                                                                                                                                                                                                                                                                                                                                                                                                                                                                                                                                      | 0.6*k_CH300H_OH                        | Taraborrelli (2016)  |
| G45085  | TrGC   | C1ODC2OOHC4OD + OH → CO <sub>2</sub> H <sub>3</sub> CHO + CO + H <sub>2</sub> O + OH                                                                                                                                                                                                                                                                                                                                                                                                                                                                                                                                                                                                                                                                                     | k_t*f_o*f_tch2oh+k_t*f_toh*f_toh*f_cho | Taraborrelli (2016)  |
| G45086  | TrGC   | C1ODC3O2C4OOH → MGLYOX + HOOCH <sub>2</sub> CHO + HO <sub>2</sub>                                                                                                                                                                                                                                                                                                                                                                                                                                                                                                                                                                                                                                                                                                        | k1_R02s0R02                            | Taraborrelli (2016)  |
| G45087  | TrGCN  | C1ODC3O2C4OOH + NO → MGLYOX + HOOCH <sub>2</sub> CHO + HO <sub>2</sub> + NO <sub>2</sub>                                                                                                                                                                                                                                                                                                                                                                                                                                                                                                                                                                                                                                                                                 | KR02N0                                 | Taraborrelli (2016)  |
| G45088  | TrGC   | C1ODC3O2C4OOH + HO <sub>2</sub> → .5 CH <sub>3</sub> C(O) + .5 CO + .5 MGLYOX + .5 HO <sub>2</sub> + HOOCH <sub>2</sub> CO <sub>3</sub>                                                                                                                                                                                                                                                                                                                                                                                                                                                                                                                                                                                                                                  | KR02H02(5)                             | Taraborrelli (2016)  |
| G45089  | TrGC   | C1ODC3O2C4OOH → MGLYOX + OH + HOOCH <sub>2</sub> CHO                                                                                                                                                                                                                                                                                                                                                                                                                                                                                                                                                                                                                                                                                                                     | KHSD                                   | Taraborrelli (2016)  |

Table 1: Gas phase reactions (... continued)

| #       | labels | reaction                                                                                                                                                                                                                                                                                                                                                                                                                         | rate coefficient                                                                                      | reference                                        |
|---------|--------|----------------------------------------------------------------------------------------------------------------------------------------------------------------------------------------------------------------------------------------------------------------------------------------------------------------------------------------------------------------------------------------------------------------------------------|-------------------------------------------------------------------------------------------------------|--------------------------------------------------|
| G45090  | TrGC   | $\text{C1OOHC3O2C4OD} \rightarrow .625 \text{ MGLYOX} + 2 \text{ CO} + 1.625 \text{ HO}_2 + .375 \text{ CH}_3\text{C(O)} + .375 \text{ CO}_2 + \text{OH}$                                                                                                                                                                                                                                                                        | K15HSDHB                                                                                              | Taraborrelli (2016)                              |
| G45091  | TrGC   | $\text{LHC4ACCO3} \rightarrow \text{ZCO3HC23DBCOD} + \text{HO}_2$                                                                                                                                                                                                                                                                                                                                                                | K16HS                                                                                                 | Taraborrelli (2016)                              |
| G45092a | TrGC   | $\text{ZCODC23DBCOD} + \text{OH} \rightarrow \text{C1ODC2O2C4OD}$                                                                                                                                                                                                                                                                                                                                                                | $(k_{\text{adt}}+k_{\text{ads}})*a_{\text{cho}}*a_{\text{cho}}$                                       | Taraborrelli (2016)*                             |
| G45092b | TrGC   | $\text{ZCODC23DBCOD} + \text{OH} \rightarrow \text{ZCO3C23DBCOD}$                                                                                                                                                                                                                                                                                                                                                                | $2*k_t*f_o*f_{\text{alk}}$                                                                            | Taraborrelli (2016)*                             |
| G45093  | TrGCN  | $\text{ZCODC23DBCOD} + \text{NO}_3 \rightarrow \text{ZCO3C23DBCOD} + \text{HNO}_3$                                                                                                                                                                                                                                                                                                                                               | $\text{KN03AL}*4.25*2.$                                                                               | Taraborrelli (2016)*                             |
| G45094a | TrGC   | $\text{C1ODC2O2C4OD} + \text{HO}_2 \rightarrow \text{OH} + \text{MGLYOX} + \text{HOCHCHO}$                                                                                                                                                                                                                                                                                                                                       | $\text{KR02H02(5)}*r_{\text{coch2o2\_oh}}$                                                            | Taraborrelli (2016)                              |
| G45094b | TrGC   | $\text{C1ODC2O2C4OD} + \text{HO}_2 \rightarrow \text{C1ODC2OOHC4OD}$                                                                                                                                                                                                                                                                                                                                                             | $\text{KR02H02(5)}*r_{\text{coch2o2\_ooh}}$                                                           | Taraborrelli (2016)                              |
| G45095  | TrGCN  | $\text{C1ODC2O2C4OD} + \text{NO} \rightarrow \text{NO}_2 + \text{MGLYOX} + \text{HOCHCHO}$                                                                                                                                                                                                                                                                                                                                       | KR02N0                                                                                                | Taraborrelli (2016)*                             |
| G45096  | TrGC   | $\text{C1ODC2O2C4OD} \rightarrow \text{MGLYOX} + \text{HOCHCHO}$                                                                                                                                                                                                                                                                                                                                                                 | $k1\_R02t0R02$                                                                                        | Taraborrelli (2016)                              |
| G45097a | TrGC   | $\text{C1ODC2OOHC4OD} + \text{OH} \rightarrow \text{MGLYOX} + 2 \text{ CO}$                                                                                                                                                                                                                                                                                                                                                      | $(2*k_t*f_o*f_{\text{tch2oh}}*f_{\text{alk}}+k_t*f_{\text{toh}}*f_{\text{cho}}*f_{\text{pch2oh}})*.5$ | Taraborrelli (2016)                              |
| G45097b | TrGC   | $\text{C1ODC2OOHC4OD} + \text{OH} \rightarrow \text{MGLYOX} + 2 \text{ CO} + \text{OH}$                                                                                                                                                                                                                                                                                                                                          | $(2*k_t*f_o*f_{\text{tch2oh}}*f_{\text{alk}}+k_t*f_{\text{toh}}*f_{\text{cho}}*f_{\text{pch2oh}})*.5$ | Taraborrelli (2016)                              |
| G45098  | TrGCN  | $\text{LISOPACNO3O2} + \text{NO} \rightarrow .21 \text{ NOA} + .21 \text{ HOCH}_2\text{CHO} + .21 \text{ HO}_2 + .49 \text{ HO12CO3C4} + .49 \text{ HCHO} + .49 \text{ NO}_2 + .045 \text{ MVKNO3} + .045 \text{ HCHO} + .255 \text{ CH}_3\text{COCH}_2\text{OH} + .255 \text{ NO}_3\text{CH}_2\text{CHO} + .225 \text{ H}_2\text{O}_2 + \text{NO}_2$                                                                            | KR02N0                                                                                                | Taraborrelli (2016)*                             |
| G45099  | TrGCN  | $\text{LISOPACNO3O2} \rightarrow .21 \text{ NOA} + .21 \text{ HOCH}_2\text{CHO} + .21 \text{ HO}_2 + .49 \text{ HO12CO3C4} + .49 \text{ HCHO} + .49 \text{ NO}_2 + .045 \text{ MVKNO3} + .045 \text{ HCHO} + .255 \text{ CH}_3\text{COCH}_2\text{OH} + .255 \text{ NO}_3\text{CH}_2\text{CHO} + .225 \text{ H}_2\text{O}_2$                                                                                                      | $k1\_R02t0R02+\text{KR02H02(5)}*c(\text{ind\_H02})$                                                   | Taraborrelli (2016)                              |
| G45100  | TrGCN  | $\text{ISOPBDNO3O2} + \text{NO} \rightarrow .6 \text{ CH}_3\text{COCH}_2\text{OH} + .6 \text{ HOCH}_2\text{CHO} + .26 \text{ MACRN} + .14 \text{ MVKNO3} + .4 \text{ HCHO} + .4 \text{ HO}_2 + 1.6 \text{ NO}_2$                                                                                                                                                                                                                 | KR02N0                                                                                                | Taraborrelli (2016)*                             |
| G45101  | TrGCN  | $\text{ISOPBDNO3O2} \rightarrow .6 \text{ CH}_3\text{COCH}_2\text{OH} + .6 \text{ HOCH}_2\text{CHO} + .26 \text{ MACRN} + .14 \text{ MVKNO3} + .4 \text{ HCHO} + .4 \text{ HO}_2 + .6 \text{ NO}_2$                                                                                                                                                                                                                              | $k1\_R02s0R02+\text{KR02H02(5)}*c(\text{ind\_H02})$                                                   | Taraborrelli (2016)                              |
| G45102  | TrGCN  | $\text{LISOPACNO3} + \text{O}_3 \rightarrow .8704 \text{ OH} + .365 \text{ HO}_2 + .73 \text{ MGLYOX} + .4325 \text{ NO}_3\text{CH}_2\text{CHO} + .135 \text{ CH}_3\text{COCH}_2\text{OH} + .0675 \text{ GLYOX} + .4325 \text{ NO}_2 + .0891 \text{ H}_2\text{O}_2 + .135 \text{ NOA} + .0675 \text{ HOCHCHO} + .3866 \text{ HOCH}_2\text{CHO} + .0405 \text{ CH}_3\text{OH} + .0405 \text{ CO} + .0054 \text{ HOCH}_2\text{CO}$ | $2.8\text{E}-17$                                                                                      | Feierabend et al. (2008),<br>Taraborrelli (2016) |

Table 1: Gas phase reactions (... continued)

| #       | labels | reaction                                                                                                                                                                                                                                                                                                                                                                                                                                                                                                                                                                      | rate coefficient                             | reference                            |
|---------|--------|-------------------------------------------------------------------------------------------------------------------------------------------------------------------------------------------------------------------------------------------------------------------------------------------------------------------------------------------------------------------------------------------------------------------------------------------------------------------------------------------------------------------------------------------------------------------------------|----------------------------------------------|--------------------------------------|
| G45103  | TrGC   | DB1O2 $\rightarrow$ DB1O2                                                                                                                                                                                                                                                                                                                                                                                                                                                                                                                                                     | k1_R02s0R02                                  | Taraborrelli (2016)                  |
| G45104a | TrGC   | DB1O2 + HO <sub>2</sub> $\rightarrow$ DB1OOH                                                                                                                                                                                                                                                                                                                                                                                                                                                                                                                                  | KR02H02(5)*(1.-rchohch2o2_oh)                | Taraborrelli (2016)*                 |
| G45104b | TrGC   | DB1O2 + HO <sub>2</sub> $\rightarrow$ DB1O2 + OH                                                                                                                                                                                                                                                                                                                                                                                                                                                                                                                              | KR02H02(5)*rchohch2o2_oh                     | Taraborrelli (2016)                  |
| G45105a | TrGCN  | DB1O2 + NO $\rightarrow$ DB1O2 + NO <sub>2</sub>                                                                                                                                                                                                                                                                                                                                                                                                                                                                                                                              | KR02N0*(1.-alpha_AN(7,2,0,0,0, temp, cair))  | Taraborrelli (2016)                  |
| G45105b | TrGCN  | DB1O2 + NO $\rightarrow$ DB1NO3                                                                                                                                                                                                                                                                                                                                                                                                                                                                                                                                               | KR02N0*alpha_AN(7,2,0,0,0, temp, cair)       | Taraborrelli (2016)                  |
| G45106  | TrGCN  | DB1O2 + NO <sub>3</sub> $\rightarrow$ DB1O2 + NO <sub>2</sub>                                                                                                                                                                                                                                                                                                                                                                                                                                                                                                                 | KR02N03                                      | Taraborrelli (2016)                  |
| G45107  | TrGC   | DB1O2 $\rightarrow$ DB1O2 + OH                                                                                                                                                                                                                                                                                                                                                                                                                                                                                                                                                | 1.E4                                         | Peeters and Nguyen (2012)*           |
| G45108a | TrGC   | DB1O2 $\rightarrow$ DB1O2                                                                                                                                                                                                                                                                                                                                                                                                                                                                                                                                                     | KDEC*0.72                                    | see note*                            |
| G45108b | TrGC   | DB1O2 $\rightarrow$ .5 HVMK + .5 HMAc + HCHO + HO <sub>2</sub>                                                                                                                                                                                                                                                                                                                                                                                                                                                                                                                | KDEC*0.28                                    | see note*                            |
| G45109  | TrGC   | DB1O2 $\rightarrow$ .48 CH <sub>3</sub> COCH <sub>2</sub> OH + .52 HOCH <sub>2</sub> CHO + .52 MGLYOX + .48 GLYOX + HO <sub>2</sub>                                                                                                                                                                                                                                                                                                                                                                                                                                           | k1_R02s0R02                                  | Taraborrelli (2016)                  |
| G45110a | TrGC   | DB1O2 + HO <sub>2</sub> $\rightarrow$ DB2OOH                                                                                                                                                                                                                                                                                                                                                                                                                                                                                                                                  | KR02H02(5)*(1.-rchohch2o2_oh)                | Taraborrelli (2016)                  |
| G45110b | TrGC   | DB1O2 + HO <sub>2</sub> $\rightarrow$ .48 CH <sub>3</sub> COCH <sub>2</sub> OH + .52 HOCH <sub>2</sub> CHO + .52 MGLYOX + .48 GLYOX + HO <sub>2</sub> + OH                                                                                                                                                                                                                                                                                                                                                                                                                    | KR02H02(5)*rchohch2o2_oh                     | Taraborrelli (2016)                  |
| G45111  | TrGCN  | DB1O2 + NO $\rightarrow$ .48 CH <sub>3</sub> COCH <sub>2</sub> OH + .52 HOCH <sub>2</sub> CHO + .52 MGLYOX + .48 GLYOX + HO <sub>2</sub> + NO <sub>2</sub>                                                                                                                                                                                                                                                                                                                                                                                                                    | KR02N0                                       | see note*                            |
| G45112  | TrGCN  | DB1O2 + NO <sub>3</sub> $\rightarrow$ .48 CH <sub>3</sub> COCH <sub>2</sub> OH + .52 HOCH <sub>2</sub> CHO + .52 MGLYOX + .48 GLYOX + HO <sub>2</sub> + NO <sub>2</sub>                                                                                                                                                                                                                                                                                                                                                                                                       | KR02N03                                      | Taraborrelli (2016)                  |
| G45113  | TrGC   | DB1O2 $\rightarrow$ .48 MACROOH + .52 LHMVKABOOH + CO + OH                                                                                                                                                                                                                                                                                                                                                                                                                                                                                                                    | K14HSAL                                      | Taraborrelli (2016)                  |
| G45114a | TrGC   | DB1OOH + OH $\rightarrow$ DB1O2                                                                                                                                                                                                                                                                                                                                                                                                                                                                                                                                               | .6*k_CH300H_OH                               | Taraborrelli (2016)                  |
| G45114b | TrGC   | DB1OOH + OH $\rightarrow$ HCOOH + HO <sub>2</sub> + CH <sub>3</sub> COCHO <sub>2</sub> CHO                                                                                                                                                                                                                                                                                                                                                                                                                                                                                    | k_adt                                        | Taraborrelli (2016)*                 |
| G45115  | TrGC   | DB1OOH + HCOOH $\rightarrow$ C1ODC2OOHC4OD + HCOOH                                                                                                                                                                                                                                                                                                                                                                                                                                                                                                                            | 4.67E-26*temp**3.286*EXP(4509./(1.987*temp)) | Taraborrelli (2016), daSilva (2010)* |
| G45116  | TrGCN  | DB1NO3 + OH $\rightarrow$ HCOOH + NO <sub>2</sub> + CH <sub>3</sub> COCHO <sub>2</sub> CHO                                                                                                                                                                                                                                                                                                                                                                                                                                                                                    | k_adt                                        | Taraborrelli (2016)*                 |
| G45117  | TrGC   | DB2OOH + OH $\rightarrow$ DB1O2                                                                                                                                                                                                                                                                                                                                                                                                                                                                                                                                               | .6*k_CH300H_OH                               | Taraborrelli (2016)*                 |
| G45118  | TrGC   | LISOPACOOH + O <sub>3</sub> $\rightarrow$ 1.3272 OH + .36986 HO <sub>2</sub> + .0432 H <sub>2</sub> O <sub>2</sub> + .08422 CO + .2025 CH <sub>3</sub> OOH + .01215 CH <sub>2</sub> OO + .3704 HCHO + .00405 CH <sub>3</sub> OH + .0405 CO <sub>2</sub> + .1825 HOCH <sub>2</sub> COCH <sub>2</sub> O <sub>2</sub> + .365 MGLYOX + .3866 HOOCH <sub>2</sub> CHO + .135 CH <sub>3</sub> COCH <sub>2</sub> OH + .0675 GLYOX + .00324 HCOCO + .3866 HOCH <sub>2</sub> CHO + .135 CH <sub>3</sub> COCH <sub>2</sub> O <sub>2</sub> H + .0675 HOCHCHO + .0054 HOCH <sub>2</sub> CO | 4.829E-16                                    | Taraborrelli (2016)                  |

Table 1: Gas phase reactions (... continued)

| #       | labels | reaction                                                                                                                                                                                                                                   | rate coefficient                                                           | reference                                                                   |
|---------|--------|--------------------------------------------------------------------------------------------------------------------------------------------------------------------------------------------------------------------------------------------|----------------------------------------------------------------------------|-----------------------------------------------------------------------------|
| G45119a | TrGC   | $\text{ZCO3HC23DBCOD} + \text{OH} \rightarrow .62 \text{ CO2H3CHO} + .62 \text{ OH} + .62 \text{ CO}_2 + .38 \text{ MGLYOX} + .38 \text{ HCOCO}_3\text{H} + .38 \text{ HO}_2$                                                              | $k_{\text{adt}}*a_{\text{cho}}*a_{\text{co2h}}$                            | Taraborrelli (2016)                                                         |
| G45119b | TrGC   | $\text{ZCO3HC23DBCOD} + \text{OH} \rightarrow .62 \text{ CH}_3\text{COCO}_3\text{H} + 1.24 \text{ CO} + 1.24 \text{ HO}_2 + .38 \text{ MGLYOX} + .38 \text{ HO}_2 + .38 \text{ CO} + .38 \text{ HO}_2 + .38 \text{ OH} + .38 \text{ CO}_2$ | $k_{\text{ads}}*a_{\text{cho}}*a_{\text{co2h}}$                            | Taraborrelli (2016)                                                         |
| G45120  | TrGC   | $\text{LISOPEFO2} \rightarrow \text{LISOPEFO}$                                                                                                                                                                                             | $k1_{\text{R02p0R02}}$                                                     | Taraborrelli (2016)                                                         |
| G45121a | TrGCN  | $\text{LISOPEFO2} + \text{NO} \rightarrow \text{LISOPEFO} + \text{NO}_2$                                                                                                                                                                   | $\text{KR02N0}*(1.-\alpha_{\text{AN}}(6,1,0,0,0,\text{temp},\text{cair}))$ | Taraborrelli (2016)                                                         |
| G45121b | TrGCN  | $\text{LISOPEFO2} + \text{NO} \rightarrow \text{ISOPDNO3}$                                                                                                                                                                                 | $\text{KR02N0}*\alpha_{\text{AN}}(6,1,0,0,0,\text{temp},\text{cair})$      | Taraborrelli (2016)*                                                        |
| G45122a | TrGC   | $\text{LISOPEFO2} + \text{HO}_2 \rightarrow .7143 \text{ ISOPDOOH} + .2857 \text{ ISOPBOOH}$                                                                                                                                               | $\text{KR02H02}(5)*(1.-\text{rchohch2o2\_oh})$                             | Taraborrelli (2016)                                                         |
| G45122b | TrGC   | $\text{LISOPEFO2} + \text{HO}_2 \rightarrow \text{LISOPEFO} + \text{OH}$                                                                                                                                                                   | $\text{KR02H02}(5)*\text{rchohch2o2\_oh}$                                  | Taraborrelli (2016)                                                         |
| G45123  | TrGCN  | $\text{LISOPEFO2} + \text{NO}_3 \rightarrow \text{LISOPEFO} + \text{NO}_2$                                                                                                                                                                 | $\text{KR02N03}$                                                           | Taraborrelli (2016)                                                         |
| G45124  | TrGC   | $\text{LISOPEFO2} \rightarrow .7143 \text{ MACR} + .2857 \text{ MVK} + \text{HCHO} + \text{OH}$                                                                                                                                            | $.7143*\text{KHSD}+.2857*\text{KHSB}$                                      | Taraborrelli (2016)                                                         |
| G45125  | TrGC   | $\text{LISOPEFO} \rightarrow .7143 \text{ MACR} + .2857 \text{ MVK} + \text{HCHO} + \text{HO}_2$                                                                                                                                           | $\text{KDEC}$                                                              | Taraborrelli (2016)                                                         |
| G45126a | TrGC   | $\text{LISOPACO} \rightarrow 3\text{METHYLFURAN} + \text{HO}_2$                                                                                                                                                                            | $\text{KDEC}*0.37$                                                         | Taraborrelli (2016), Paulot et al. (2009a), Francisco-Marquez et al. (2003) |
| G45126b | TrGC   | $\text{LISOPACO} \rightarrow .65 \text{ LHC4ACCHO} + .65 \text{ HO}_2 + .35 \text{ DB1O2}$                                                                                                                                                 | $\text{KDEC}*(1.-0.37)$                                                    | Taraborrelli (2016), Paulot et al. (2009a), Francisco-Marquez et al. (2003) |
| G45127a | TrGC   | $\text{LISOPACO} \rightarrow 3\text{METHYLFURAN} + \text{HO}_2$                                                                                                                                                                            | $\text{KDEC}*0.37$                                                         | Taraborrelli (2016), Paulot et al. (2009a), Francisco-Marquez et al. (2003) |
| G45127b | TrGC   | $\text{LISOPACO} \rightarrow .65 \text{ LHC4ACCHO} + .65 \text{ HO}_2 + .35 \text{ DB1O2}$                                                                                                                                                 | $\text{KDEC}*(1.-0.37)$                                                    | Taraborrelli (2016), Paulot et al. (2009a), Francisco-Marquez et al. (2003) |
| G45128  | TrGC   | $3\text{METHYLFURAN} + \text{OH} \rightarrow \text{L3METHYLFURANO2}$                                                                                                                                                                       | $3.2\text{E}-11*\text{EXP}(310./\text{temp})$                              | Taraborrelli (2016)*                                                        |
| G45129  | TrGCN  | $3\text{METHYLFURAN} + \text{NO}_3 \rightarrow \text{L3METHYLFURANO2} + \text{NO}_2$                                                                                                                                                       | $1.9\text{E}-11$                                                           | Taraborrelli (2016), Atkinson et al. (2006)*                                |
| G45130  | TrGC   | $\text{L3METHYLFURANO2} \rightarrow \text{ZCODC23DBCOD} + \text{HO}_2$                                                                                                                                                                     | $k1_{\text{R02s0R02}}$                                                     | Taraborrelli (2016)                                                         |

Table 1: Gas phase reactions (... continued)

| #       | labels   | reaction                                                                                                   | rate coefficient          | reference                                      |
|---------|----------|------------------------------------------------------------------------------------------------------------|---------------------------|------------------------------------------------|
| G45131  | TrGCN    | L3METHYLFURANO2 + NO → ZCODC23DBCOD + HO <sub>2</sub> + NO <sub>2</sub>                                    | KR02N0                    | Taraborrelli (2016)*                           |
| G45132  | TrGC     | L3METHYLFURANO2 + HO <sub>2</sub> → ZCODC23DBCOD + HO <sub>2</sub>                                         | KR02H02(5)                | Taraborrelli (2016)*                           |
| G45133  | TrGC     | ZCO3C23DBCOD → .62 EZCH3CO2CHCHO + .38 EZCHOCCH3CHO2 + CO <sub>2</sub>                                     | k1_R02RC03                | Taraborrelli (2016)                            |
| G45134a | TrGC     | ZCO3C23DBCOD + HO <sub>2</sub> → .62 EZCH3CO2CHCHO + .38 EZCHOCCH3CHO2 + CO <sub>2</sub> + OH              | KAPH02*rco3_oh            | Taraborrelli (2016)                            |
| G45134b | TrGC     | ZCO3C23DBCOD + HO <sub>2</sub> → ZCO3HC23DBCOD                                                             | KAPH02*(rco3_ooh+rco3_o3) | Taraborrelli (2016)*                           |
| G45135  | TrGCN    | ZCO3C23DBCOD + NO → .62 EZCH3CO2CHCHO + .38 EZCHOCCH3CHO2 + CO <sub>2</sub> + NO <sub>2</sub>              | KAPN0                     | Taraborrelli (2016)                            |
| G45136  | TrGCN    | ZCO3C23DBCOD + NO <sub>2</sub> → ZCPANC23DBCOD                                                             | k_CH3C03_N02              | Rickard and Pascoe (2009)                      |
| G45137  | TrGCN    | ZCO3C23DBCOD + NO <sub>3</sub> → .62 EZCH3CO2CHCHO + .38 EZCHOCCH3CHO2 + CO <sub>2</sub> + NO <sub>2</sub> | 1.6*KR02N03               | Taraborrelli (2016)                            |
| G45138  | TrGCN    | ZCPANC23DBCOD → ZCO3C23DBCOD + NO <sub>2</sub>                                                             | k_PAN_M                   | Rickard and Pascoe (2009)                      |
| G45139  | TrGCN    | ZCPANC23DBCOD + OH → .62 EZCH3CO2CHCHO + .38 EZCHOCCH3CHO2 + CO <sub>2</sub> + NO <sub>2</sub>             | 2.52E-11                  | Taraborrelli (2016)*                           |
| G45200  | TrGTerC  | C511O2 → CH <sub>3</sub> C(O) + HCOCH2CHO                                                                  | k1_R02s0R02               | Rickard and Pascoe (2009)                      |
| G45201  | TrGTerCN | C511O2 + NO → CH <sub>3</sub> C(O) + HCOCH2CHO + NO <sub>2</sub>                                           | KR02N0                    | Rickard and Pascoe (2009)*                     |
| G45202a | TrGTerC  | C511O2 + HO <sub>2</sub> → C511OOH                                                                         | KR02H02(5)*rcoch2o2_ooh   | Rickard and Pascoe (2009), Taraborrelli (2016) |
| G45202b | TrGTerC  | C511O2 + HO <sub>2</sub> → CH <sub>3</sub> C(O) + HCOCH2CHO + OH                                           | KR02H02(5)*rcoch2o2_oh    | Rickard and Pascoe (2009), Taraborrelli (2016) |
| G45203  | TrGTerC  | C511OOH + OH → C511O2                                                                                      | 7.49E-11                  | Rickard and Pascoe (2009)                      |
| G45204  | TrGTerC  | CO23C4CHO + OH → CO23C4CO3                                                                                 | 6.65E-11                  | Rickard and Pascoe (2009)                      |
| G45205  | TrGTerCN | CO23C4CHO + NO <sub>3</sub> → CO23C4CO3 + HNO <sub>3</sub>                                                 | KN03AL*5.5                | Rickard and Pascoe (2009)                      |
| G45206  | TrGTerC  | CO23C4CO3 → CH <sub>3</sub> COCOCH <sub>2</sub> O <sub>2</sub> + CO <sub>2</sub>                           | k1_R02RC03                | Rickard and Pascoe (2009)                      |
| G45207  | TrGTerCN | CO23C4CO3 + NO → CH <sub>3</sub> COCOCH <sub>2</sub> O <sub>2</sub> + CO <sub>2</sub> + NO <sub>2</sub>    | KAPN0                     | Rickard and Pascoe (2009)*                     |
| G45208  | TrGTerCN | CO23C4CO3 + NO <sub>2</sub> → C5PAN9                                                                       | k_CH3C03_N02              | Rickard and Pascoe (2009)                      |
| G45209a | TrGTerC  | CO23C4CO3 + HO <sub>2</sub> → CO23C4CO3H                                                                   | KAPH02*(rco3_ooh+rco3_o3) | Rickard and Pascoe (2009)                      |
| G45209b | TrGTerC  | CO23C4CO3 + HO <sub>2</sub> → CH <sub>3</sub> COCOCH <sub>2</sub> O <sub>2</sub> + CO <sub>2</sub> + OH    | KAPH02*rco3_oh            | Rickard and Pascoe (2009)                      |
| G45210  | TrGTerCN | C5PAN9 → CO23C4CO3 + NO <sub>2</sub>                                                                       | k_PAN_M                   | Rickard and Pascoe (2009)                      |
| G45211  | TrGTerCN | C5PAN9 + OH → CH <sub>3</sub> COCOCHO + CO + NO <sub>2</sub>                                               | 3.12E-13                  | Rickard and Pascoe (2009)                      |
| G45212  | TrGTerC  | C512O2 → C513O2                                                                                            | k1_R02pR02                | Rickard and Pascoe (2009)                      |
| G45213  | TrGTerC  | C512O2 + HO <sub>2</sub> → C512OOH                                                                         | KR02H02(5)                | Rickard and Pascoe (2009)                      |

Table 1: Gas phase reactions (... continued)

| #       | labels   | reaction                                                                                                                                              | rate coefficient                              | reference                                          |
|---------|----------|-------------------------------------------------------------------------------------------------------------------------------------------------------|-----------------------------------------------|----------------------------------------------------|
| G45214  | TrGTerCN | $\text{C512O2} + \text{NO} \rightarrow \text{C513O2} + \text{NO}_2$                                                                                   | KR02N0                                        | Rickard and Pascoe (2009)*                         |
| G45215  | TrGTerC  | $\text{C512OOH} + \text{OH} \rightarrow \text{CO13C4CHO} + \text{OH}$                                                                                 | 1.01E-10                                      | Rickard and Pascoe (2009)                          |
| G45216  | TrGTerC  | $\text{C513O2} \rightarrow \text{GLYOX} + \text{HOC}_2\text{H}_4\text{CO}_3$                                                                          | k1_R02s0R02                                   | Rickard and Pascoe (2009)                          |
| G45217  | TrGTerCN | $\text{C513O2} + \text{NO} \rightarrow \text{GLYOX} + \text{HOC}_2\text{H}_4\text{CO}_3 + \text{NO}_2$                                                | KR02N0                                        | Rickard and Pascoe (2009)*                         |
| G45218a | TrGTerC  | $\text{C513O2} + \text{HO}_2 \rightarrow \text{C513OOH}$                                                                                              | KR02H02(5)*rcoch2o2_ooh                       | Rickard and Pascoe (2009),<br>Taraborrelli (2016)  |
| G45218b | TrGTerC  | $\text{C513O2} + \text{HO}_2 \rightarrow \text{GLYOX} + \text{HOC}_2\text{H}_4\text{CO}_3 + \text{OH}$                                                | KR02H02(5)*rcoch2o2_oh                        | Rickard and Pascoe (2009),<br>Taraborrelli (2016)  |
| G45219  | TrGTerC  | $\text{CO13C4CHO} + \text{OH} \rightarrow \text{CHOC3COCO3}$                                                                                          | 1.33E-10                                      | Rickard and Pascoe (2009)                          |
| G45220  | TrGTerCN | $\text{CO13C4CHO} + \text{NO}_3 \rightarrow \text{CHOC3COCO3} + \text{HNO}_3$                                                                         | 2.*KN03AL*5.5                                 | Rickard and Pascoe (2009)                          |
| G45221  | TrGTerC  | $\text{C513OOH} + \text{OH} \rightarrow \text{C513CO} + \text{OH}$                                                                                    | 9.23E-11                                      | Rickard and Pascoe (2009)                          |
| G45222  | TrGTerC  | $\text{CHOC3COCO3} \rightarrow \text{CHOC3COO2} + \text{CO}_2$                                                                                        | k1_R02RC03                                    | Rickard and Pascoe (2009)                          |
| G45223  | TrGTerC  | $\text{CHOC3COCO3} + \text{HO}_2 \rightarrow \text{CHOC3COOOH}$                                                                                       | KAPH02                                        | Rickard and Pascoe (2009)                          |
| G45224  | TrGTerCN | $\text{CHOC3COCO3} + \text{NO}_2 \rightarrow \text{CHOC3COPAN}$                                                                                       | k_CH3C03_N02                                  | Rickard and Pascoe (2009)                          |
| G45225  | TrGTerCN | $\text{CHOC3COCO3} + \text{NO} \rightarrow \text{CHOC3COO2} + \text{CO}_2 + \text{NO}_2$                                                              | KAPN0                                         | Rickard and Pascoe (2009)*                         |
| G45226  | TrGTerC  | $\text{C513CO} + \text{OH} \rightarrow \text{HOC}_2\text{H}_4\text{CO}_3 + \text{CO} + \text{CO}$                                                     | 2.64E-11                                      | Rickard and Pascoe (2009)                          |
| G45227  | TrGTerC  | $\text{C514O2} + \text{HO}_2 \rightarrow \text{C514OOH}$                                                                                              | KR02H02(5)                                    | Rickard and Pascoe (2009)                          |
| G45228a | TrGTerCN | $\text{C514O2} + \text{NO} \rightarrow \text{CO13C4CHO} + \text{HO}_2 + \text{NO}_2$                                                                  | KR02N0*(1.-alpha_AN(7,2,0,1,0,<br>temp,cair)) | Rickard and Pascoe (2009),<br>Taraborrelli (2016)  |
| G45228b | TrGTerCN | $\text{C514O2} + \text{NO} \rightarrow \text{C514NO3}$                                                                                                | KR02N0*alpha_AN(7,2,0,1,0,temp,<br>cair)      | Rickard and Pascoe (2009),<br>Taraborrelli (2016)  |
| G45229  | TrGTerCN | $\text{C514O2} + \text{NO}_3 \rightarrow \text{CO13C4CHO} + \text{HO}_2 + \text{NO}_2$                                                                | KR02N03                                       | Rickard and Pascoe (2009)                          |
| G45230  | TrGTerC  | $\text{C514O2} \rightarrow \text{CO13C4CHO} + \text{HO}_2$                                                                                            | k1_R02sR02                                    | Rickard and Pascoe (2009)                          |
| G45231  | TrGTerC  | $\text{C514OOH} + \text{OH} \rightarrow \text{CO13C4CHO} + \text{OH}$                                                                                 | 1.10E-10                                      | Rickard and Pascoe (2009)                          |
| G45232  | TrGTerCN | $\text{C514NO3} + \text{OH} \rightarrow \text{CO13C4CHO} + \text{NO}_2$                                                                               | 4.33E-11                                      | Rickard and Pascoe (2009)                          |
| G45233  | TrGTerC  | $\text{CHOC3COOOH} + \text{OH} \rightarrow \text{CHOC3COCO3}$                                                                                         | 7.55E-11                                      | Rickard and Pascoe (2009)                          |
| G45234  | TrGTerCN | $\text{CHOC3COPAN} \rightarrow \text{CHOC3COCO3} + \text{NO}_2$                                                                                       | k_PAN_M                                       | Rickard and Pascoe (2009)                          |
| G45235  | TrGTerCN | $\text{CHOC3COPAN} + \text{OH} \rightarrow \text{C4CODIAL} + \text{CO} + \text{NO}_2$                                                                 | 7.19E-11                                      | Rickard and Pascoe (2009)                          |
| G45236  | TrGTerC  | $\text{MBO} + \text{OH} \rightarrow \text{LMBOABO2}$                                                                                                  | 8.1E-12*EXP(610./TEMP)                        | Rickard and Pascoe (2009),<br>Taraborrelli (2016)* |
| G45237a | TrGTerC  | $\text{MBO} + \text{O}_3 \rightarrow \text{HCHO} + .16 \text{CH}_3\text{COCH}_3 + .16 \text{HO}_2 + .16 \text{CO} + .16 \text{OH} + .84 \text{MBOOO}$ | 1.0E-17*0.57                                  | Rickard and Pascoe (2009),<br>Taraborrelli (2016)  |
| G45237b | TrGTerC  | $\text{MBO} + \text{O}_3 \rightarrow \text{IBUTALOH} + .63 \text{CO} + .37 \text{HOCH}_2\text{OOH} + .16 \text{OH} + .16 \text{HO}_2$                 | 1.0E-17*0.43                                  | Rickard and Pascoe (2009),<br>Taraborrelli (2016)  |

Table 1: Gas phase reactions (... continued)

| #       | labels   | reaction                                                                                                                                                                                                   | rate coefficient                                                                                                                                                      | reference                                       |
|---------|----------|------------------------------------------------------------------------------------------------------------------------------------------------------------------------------------------------------------|-----------------------------------------------------------------------------------------------------------------------------------------------------------------------|-------------------------------------------------|
| G45238  | TrGTerCN | $\text{MBO} + \text{NO}_3 \rightarrow \text{LNMBOABO2}$                                                                                                                                                    | $4.6\text{E-}14 \cdot \text{EXP}(-400./\text{TEMP})$                                                                                                                  | Rickard and Pascoe (2009), Taraborrelli (2016)  |
| G45239  | TrGTerC  | $\text{LMBOABO2} + \text{HO}_2 \rightarrow \text{LMBOABOOH}$                                                                                                                                               | $\text{KR02H02}(5)$                                                                                                                                                   | Rickard and Pascoe (2009), Taraborrelli (2016)  |
| G45240a | TrGTerCN | $\text{LMBOABO2} + \text{NO} \rightarrow \text{LMBOABNO3}$                                                                                                                                                 | $\text{KR02N0} * (.67 * \alpha_{\text{AN}}(7, 2, 0, 0, 0, \text{temp}, \text{cair}) + .33 * \alpha_{\text{AN}}(7, 1, 0, 0, 0, \text{temp}, \text{cair}))$             | Rickard and Pascoe (2009), Taraborrelli (2016)  |
| G45240b | TrGTerCN | $\text{LMBOABO2} + \text{NO} \rightarrow \text{HOCH}_2\text{CHO} + \text{CH}_3\text{COCH}_3 + \text{HO}_2 + \text{NO}_2$                                                                                   | $\text{KR02N0} * (1 - (.67 * \alpha_{\text{AN}}(7, 2, 0, 0, 0, \text{temp}, \text{cair}) + .33 * \alpha_{\text{AN}}(7, 1, 0, 0, 0, \text{temp}, \text{cair}))) * .67$ | Rickard and Pascoe (2009), Taraborrelli (2016)  |
| G45240c | TrGTerCN | $\text{LMBOABO2} + \text{NO} \rightarrow \text{IBUTALOH} + \text{HCHO} + \text{HO}_2 + \text{NO}_2$                                                                                                        | $\text{KR02N0} * (1 - (.67 * \alpha_{\text{AN}}(7, 2, 0, 0, 0, \text{temp}, \text{cair}) + .33 * \alpha_{\text{AN}}(7, 1, 0, 0, 0, \text{temp}, \text{cair}))) * .33$ | Rickard and Pascoe (2009), Taraborrelli (2016)  |
| G45241a | TrGTerC  | $\text{LMBOABO2} \rightarrow \text{HOCH}_2\text{CHO} + \text{CH}_3\text{COCH}_3 + \text{HO}_2$                                                                                                             | $\text{k1\_R02s0R02} * .67$                                                                                                                                           | Rickard and Pascoe (2009), Taraborrelli (2016)  |
| G45241b | TrGTerC  | $\text{LMBOABO2} \rightarrow \text{IBUTALOH} + \text{HCHO} + \text{HO}_2$                                                                                                                                  | $\text{k1\_R02p0R02} * .33$                                                                                                                                           | Rickard and Pascoe (2009), Taraborrelli (2016)  |
| G45242a | TrGTerC  | $\text{LMBOABOOH} + \text{OH} \rightarrow \text{MBOACO}$                                                                                                                                                   | $.67 * 2.93\text{E-}11 + .33 * 2.05\text{E-}12$                                                                                                                       | Rickard and Pascoe (2009), Taraborrelli (2016)  |
| G45242b | TrGTerC  | $\text{LMBOABOOH} + \text{OH} \rightarrow \text{LMBOABO2}$                                                                                                                                                 | $.6 * \text{k\_CH300H\_OH}$                                                                                                                                           | Rickard and Pascoe (2009), Taraborrelli (2016)  |
| G45243  | TrGTerCN | $\text{LMBOABNO3} + \text{OH} \rightarrow \text{MBOACO} + \text{NO}_2$                                                                                                                                     | $.67 * 1.75\text{E-}12 + .33 * 2.69\text{E-}12$                                                                                                                       | Rickard and Pascoe (2009), Taraborrelli (2016)  |
| G45244  | TrGTerC  | $\text{MBOACO} + \text{OH} \rightarrow \text{MBOCOCO} + \text{HO}_2$                                                                                                                                       | $3.79\text{E-}12$                                                                                                                                                     | Rickard and Pascoe (2009)                       |
| G45245  | TrGTerC  | $\text{MBOCOCO} + \text{OH} \rightarrow \text{CO} + \text{IPRHOCO3}$                                                                                                                                       | $1.38\text{E-}11$                                                                                                                                                     | Rickard and Pascoe (2009)                       |
| G45246  | TrGTerCN | $\text{LNMBOABO2} + \text{HO}_2 \rightarrow \text{LNMBOABOOH}$                                                                                                                                             | $\text{KR02H02}(5)$                                                                                                                                                   | Rickard and Pascoe (2009), Taraborrelli (2016)  |
| G45247  | TrGTerCN | $\text{LNMBOABO2} + \text{NO} \rightarrow .65 \text{NO}_3\text{CH}_2\text{CHO} + .65 \text{CH}_3\text{COCH}_3 + .65 \text{HO}_2 + .35 \text{IBUTALOH} + .35 \text{HCHO} + .35 \text{NO}_2 + \text{NO}_2$   | $\text{KR02N0}$                                                                                                                                                       | Rickard and Pascoe (2009), Taraborrelli (2016)* |
| G45248  | TrGTerCN | $\text{LNMBOABO2} + \text{NO}_3 \rightarrow .65 \text{NO}_3\text{CH}_2\text{CHO} + .65 \text{CH}_3\text{COCH}_3 + .65 \text{HO}_2 + .35 \text{IBUTALOH} + .35 \text{HCHO} + .35 \text{NO}_2 + \text{NO}_2$ | $\text{KR02N03}$                                                                                                                                                      | Rickard and Pascoe (2009), Taraborrelli (2016)  |
| G45249  | TrGTerCN | $\text{LNMBOABO2} \rightarrow .65 \text{NO}_3\text{CH}_2\text{CHO} + .65 \text{CH}_3\text{COCH}_3 + .65 \text{HO}_2 + .35 \text{IBUTALOH} + .35 \text{HCHO} + .35 \text{NO}_2$                             | $\text{k1\_R02s0R02}$                                                                                                                                                 | Rickard and Pascoe (2009), Taraborrelli (2016)  |

Table 1: Gas phase reactions (... continued)

| #       | labels   | reaction                                                                                                   | rate coefficient           | reference                                      |
|---------|----------|------------------------------------------------------------------------------------------------------------|----------------------------|------------------------------------------------|
| G45250a | TrGTerCN | LNMBOABOOH + OH $\rightarrow$ .65 C4MCONO3OH + .35 NMBOBOCO                                                | .65*4.89E-12+.35*2.52E-12  | Rickard and Pascoe (2009), Taraborrelli (2016) |
| G45250b | TrGTerCN | LNMBOABOOH + OH $\rightarrow$ LNMBOABO2                                                                    | .6*k_CH300H_OH             | Rickard and Pascoe (2009), Taraborrelli (2016) |
| G45251  | TrGTerCN | NMBOBOCO + OH $\rightarrow$ NC4OHCO3                                                                       | 4.26E-12                   | Rickard and Pascoe (2009)                      |
| G45252a | TrGTerCN | NC4OHCO3 + HO <sub>2</sub> $\rightarrow$ IBUTALOH + CO <sub>2</sub> + NO <sub>2</sub> + OH                 | KAPH02*rco3_oh             | Rickard and Pascoe (2009), Taraborrelli (2016) |
| G45252b | TrGTerCN | NC4OHCO3 + HO <sub>2</sub> $\rightarrow$ NC4OHCO3H                                                         | KAPH02*(rco3_o3+rco3_ooh)  | Rickard and Pascoe (2009), Taraborrelli (2016) |
| G45253  | TrGTerCN | NC4OHCO3 + NO $\rightarrow$ IBUTALOH + CO <sub>2</sub> + NO <sub>2</sub> + NO <sub>2</sub>                 | KAPNO                      | Rickard and Pascoe (2009)                      |
| G45254  | TrGTerCN | NC4OHCO3 + NO <sub>2</sub> $\rightarrow$ NC4OHCPAN                                                         | k_CH3CO3_NO2               | Rickard and Pascoe (2009)                      |
| G45255  | TrGTerCN | NC4OHCO3 + NO <sub>3</sub> $\rightarrow$ IBUTALOH + CO <sub>2</sub> + NO <sub>2</sub> + NO <sub>2</sub>    | KR02N03*1.74               | Rickard and Pascoe (2009)                      |
| G45256  | TrGTerCN | NC4OHCO3 $\rightarrow$ IBUTALOH + CO <sub>2</sub> + NO <sub>2</sub>                                        | k1_R02RCO3                 | Rickard and Pascoe (2009)                      |
| G45257  | TrGTerCN | NC4OHCO3H + OH $\rightarrow$ NC4OHCO3                                                                      | 4.50E-12                   | Rickard and Pascoe (2009)                      |
| G45258  | TrGTerCN | NC4OHCPAN + OH $\rightarrow$ IBUTALOH + CO + NO <sub>2</sub> + NO <sub>2</sub>                             | 1.27E-12                   | Rickard and Pascoe (2009)                      |
| G45259  | TrGTerCN | NC4OHCPAN $\rightarrow$ NC4OHCO3 + NO <sub>2</sub>                                                         | K_PAN_M                    | Rickard and Pascoe (2009)                      |
| G45260  | TrGTerCN | C4MCONO3OH + OH $\rightarrow$ CH <sub>3</sub> COCH <sub>3</sub> + HCHO + CO <sub>2</sub> + NO <sub>2</sub> | 1.23E-12                   | Rickard and Pascoe (2009), Taraborrelli (2016) |
| G45400  | TrGAroCN | NC4MDCO2HN + OH $\rightarrow$ MMALANHY + NO <sub>2</sub>                                                   | 0.6*k_CH300H_OH            | Rickard and Pascoe (2009)*                     |
| G45401  | TrGAroCN | C54CO + NO <sub>3</sub> $\rightarrow$ 3 CO + CH <sub>3</sub> C(O)OO + HNO <sub>3</sub>                     | KN03AL*5.5                 | Rickard and Pascoe (2009)                      |
| G45402  | TrGAroC  | C54CO + OH $\rightarrow$ 3 CO + CH <sub>3</sub> C(O)OO                                                     | 1.72E-11                   | Rickard and Pascoe (2009)                      |
| G45403a | TrGAroCN | NTLFUO2 + HO <sub>2</sub> $\rightarrow$ NTLFUOOH                                                           | KR02H02(5)*(1-rcoch2o2_oh) | Rickard and Pascoe (2009)                      |
| G45403b | TrGAroCN | NTLFUO2 + HO <sub>2</sub> $\rightarrow$ ACCOMECHO + NO <sub>2</sub> + OH                                   | KR02H02(5)*rcoch2o2_oh     | Rickard and Pascoe (2009)                      |
| G45404  | TrGAroCN | NTLFUO2 + NO $\rightarrow$ ACCOMECHO + NO <sub>2</sub> + NO <sub>2</sub>                                   | KR02NO                     | Rickard and Pascoe (2009)*                     |
| G45405  | TrGAroCN | NTLFUO2 + NO <sub>3</sub> $\rightarrow$ ACCOMECHO + NO <sub>2</sub> + NO <sub>2</sub>                      | KR02N03                    | Rickard and Pascoe (2009)*                     |
| G45406  | TrGAroCN | NTLFUO2 $\rightarrow$ ACCOMECHO + NO <sub>2</sub>                                                          | k1_R02t0R02                | Rickard and Pascoe (2009)*                     |
| G45407  | TrGAroC  | C5134CO2OH + OH $\rightarrow$ C54CO + HO <sub>2</sub>                                                      | 7.48E-11                   | Rickard and Pascoe (2009)                      |
| G45408  | TrGAroCN | C5COO2NO2 + OH $\rightarrow$ MGLYOX + CO + CO + NO <sub>2</sub>                                            | 5.43E-11                   | Rickard and Pascoe (2009)                      |
| G45409  | TrGAroCN | C5COO2NO2 $\rightarrow$ C5CO14O2 + NO <sub>2</sub>                                                         | k_PAN_M                    | Rickard and Pascoe (2009)*                     |
| G45410  | TrGAroC  | C5DIALOOH + OH $\rightarrow$ C5DIALCO + OH                                                                 | 7.52E-11                   | Rickard and Pascoe (2009)                      |
| G45411a | TrGAroC  | C4CO2DBCO3 + HO <sub>2</sub> $\rightarrow$ C4CO2DCO3H                                                      | KAPH02*(rco3_ooh+rco3_o3)  | Rickard and Pascoe (2009)                      |
| G45411b | TrGAroC  | C4CO2DBCO3 + HO <sub>2</sub> $\rightarrow$ HO <sub>2</sub> + CO + HCOCOCHO + CO <sub>2</sub> + OH          | KAPH02*rco3_oh             | Rickard and Pascoe (2009), Taraborrelli (2016) |
| G45412  | TrGAroCN | C4CO2DBCO3 + NO $\rightarrow$ HO <sub>2</sub> + CO + HCOCOCHO + CO <sub>2</sub> + NO <sub>2</sub>          | KAPNO                      | Rickard and Pascoe (2009)                      |

Table 1: Gas phase reactions (... continued)

| #       | labels   | reaction                                                                                                                                                                                                                                                                                                                                                    | rate coefficient                         | reference                                      |
|---------|----------|-------------------------------------------------------------------------------------------------------------------------------------------------------------------------------------------------------------------------------------------------------------------------------------------------------------------------------------------------------------|------------------------------------------|------------------------------------------------|
| G45413  | TrGAroCN | $\text{C4CO2DBCO3} + \text{NO}_2 \rightarrow \text{C4CO2DBPAN}$                                                                                                                                                                                                                                                                                             | k_CH3CO3_NO2                             | Rickard and Pascoe (2009)*                     |
| G45414  | TrGAroCN | $\text{C4CO2DBCO3} + \text{NO}_3 \rightarrow \text{HO}_2 + \text{CO} + \text{HCOCOCHO} + \text{CO}_2 + \text{NO}_2$                                                                                                                                                                                                                                         | KR02N03*1.74                             | Rickard and Pascoe (2009)                      |
| G45415  | TrGAroC  | $\text{C4CO2DBCO3} \rightarrow \text{HO}_2 + \text{CO} + \text{HCOCOCHO} + \text{CO}_2$                                                                                                                                                                                                                                                                     | k1_R02RC03                               | Rickard and Pascoe (2009)                      |
| G45416  | TrGAroC  | $\text{MMALANHY} + \text{OH} \rightarrow \text{MMALANHYO2}$                                                                                                                                                                                                                                                                                                 | 1.50E-12                                 | Rickard and Pascoe (2009)                      |
| G45421a | TrGAroC  | $\text{MMALANHYO2} + \text{HO}_2 \rightarrow \text{MMALNHYOOH}$                                                                                                                                                                                                                                                                                             | KR02H02(5)*(1-rcoch2o2_oh-rchohch2o2_oh) | Rickard and Pascoe (2009), Taraborrelli (2016) |
| G45421b | TrGAroC  | $\text{MMALANHYO2} + \text{HO}_2 \rightarrow \text{CO2H3CO3} + \text{CO}_2 + \text{OH}$                                                                                                                                                                                                                                                                     | KR02H02(5)*(rcoch2o2_oh+rchohch2o2_oh)   | Rickard and Pascoe (2009), Taraborrelli (2016) |
| G45422  | TrGAroCN | $\text{MMALANHYO2} + \text{NO} \rightarrow \text{CO2H3CO3} + \text{CO}_2 + \text{NO}_2$                                                                                                                                                                                                                                                                     | KR02N0                                   | Rickard and Pascoe (2009)*                     |
| G45423  | TrGAroCN | $\text{MMALANHYO2} + \text{NO}_3 \rightarrow \text{CO2H3CO3} + \text{CO}_2 + \text{NO}_2$                                                                                                                                                                                                                                                                   | KR02N03                                  | Rickard and Pascoe (2009)*                     |
| G45424  | TrGAroC  | $\text{MMALANHYO2} \rightarrow \text{CO2H3CO3} + \text{CO}_2$                                                                                                                                                                                                                                                                                               | k1_R02t0R02                              | Rickard and Pascoe (2009)*                     |
| G45428  | TrGAroCN | $\text{C4CO2DBPAN} + \text{OH} \rightarrow \text{HCOCOCHO} + \text{CO}_2 + \text{CO} + \text{NO}_2$                                                                                                                                                                                                                                                         | 2.74E-11                                 | Rickard and Pascoe (2009)                      |
| G45429  | TrGAroCN | $\text{C4CO2DBPAN} \rightarrow \text{C4CO2DBCO3} + \text{NO}_2$                                                                                                                                                                                                                                                                                             | k_PAN_M                                  | Rickard and Pascoe (2009)*                     |
| G45430a | TrGAroC  | $\text{C5CO14O2} + \text{HO}_2 \rightarrow .83 \text{ MALANHY} + .83 \text{ CH}_3 + .17 \text{ MGLYOX} + .17 \text{ HO}_2 + .17 \text{ CO} + .17 \text{ CO}_2 + \text{OH}$                                                                                                                                                                                  | KAPH02*rco3_oh                           | Rickard and Pascoe (2009)*                     |
| G45430b | TrGAroC  | $\text{C5CO14O2} + \text{HO}_2 \rightarrow \text{C5CO14OH} + \text{O}_3$                                                                                                                                                                                                                                                                                    | KAPH02*rco3_o3                           | Rickard and Pascoe (2009)                      |
| G45430c | TrGAroC  | $\text{C5CO14O2} + \text{HO}_2 \rightarrow \text{C5CO14OOH}$                                                                                                                                                                                                                                                                                                | KAPH02*rco3_ooh                          | Rickard and Pascoe (2009)                      |
| G45431  | TrGAroCN | $\text{C5CO14O2} + \text{NO} \rightarrow .83 \text{ MALANHY} + .83 \text{ CH}_3 + .17 \text{ MGLYOX} + .17 \text{ HO}_2 + .17 \text{ CO} + .17 \text{ CO}_2 + \text{NO}_2$                                                                                                                                                                                  | KAPN0                                    | Rickard and Pascoe (2009)*                     |
| G45432  | TrGAroCN | $\text{C5CO14O2} + \text{NO}_2 \rightarrow \text{C5COO2NO2}$                                                                                                                                                                                                                                                                                                | k_CH3CO3_NO2                             | Rickard and Pascoe (2009)*                     |
| G45433  | TrGAroCN | $\text{C5CO14O2} + \text{NO}_3 \rightarrow .83 \text{ MALANHY} + .83 \text{ CH}_3 + .17 \text{ MGLYOX} + .17 \text{ HO}_2 + .17 \text{ CO} + .17 \text{ CO}_2 + \text{NO}_2$                                                                                                                                                                                | KR02N03*1.74                             | Rickard and Pascoe (2009)*                     |
| G45434  | TrGAroC  | $\text{C5CO14O2} \rightarrow .83 \text{ MALANHY} + .83 \text{ CH}_3 + .17 \text{ MGLYOX} + .17 \text{ HO}_2 + .17 \text{ CO} + .17 \text{ CO}_2$                                                                                                                                                                                                            | k1_R02RC03                               | Rickard and Pascoe (2009)*                     |
| G45436  | TrGAroC  | $\text{C5CO14OH} + \text{OH} \rightarrow .83 \text{ MALANHY} + .83 \text{ CH}_3 + .17 \text{ MGLYOX} + .17 \text{ HO}_2 + .17 \text{ CO} + .17 \text{ CO}_2$                                                                                                                                                                                                | 5.44E-11                                 | Rickard and Pascoe (2009)*                     |
| G45441  | TrGAroCN | $\text{C5DICARB} + \text{NO}_3 \rightarrow \text{C5CO14O2} + \text{HNO}_3$                                                                                                                                                                                                                                                                                  | KN03AL*2.75                              | Rickard and Pascoe (2009)                      |
| G45442  | TrGAroC  | $\text{C5DICARB} + \text{O}_3 \rightarrow .5338 \text{ GLYOX} + .063 \text{ CH}_3\text{CHO} + .348 \text{ CH}_3\text{C(O)OO} + .918 \text{ CO} + .57 \text{ OH} + .473 \text{ HO}_2 + .0563 \text{ CH}_3\text{COCO}_2\text{H} + .5338 \text{ MGLYOX} + .676 \text{ H}_2\text{O}_2 + .063 \text{ HCHO} + .0563 \text{ HCOCO}_2\text{H} + .2465 \text{ CO}_2$ | 2.00E-18                                 | Rickard and Pascoe (2009)                      |
| G45443  | TrGAroC  | $\text{C5DICARB} + \text{OH} \rightarrow .48 \text{ C5CO14O2} + .52 \text{ C5DICARBO2}$                                                                                                                                                                                                                                                                     | 6.2E-11                                  | Rickard and Pascoe (2009)                      |

Table 1: Gas phase reactions (... continued)

| #       | labels   | reaction                                                                                                                                        | rate coefficient                         | reference                  |
|---------|----------|-------------------------------------------------------------------------------------------------------------------------------------------------|------------------------------------------|----------------------------|
| G45444  | TrGAroC  | MC3ODBCO2H + OH $\rightarrow$ .35 GLYOX + .35 CH <sub>3</sub> + .35 CO + .35 CO <sub>2</sub> + .65 MMALANHY + .65 HO <sub>2</sub>               | 4.38E-11                                 | Rickard and Pascoe (2009)* |
| G45451  | TrGAroCN | TLFUONE + NO <sub>3</sub> $\rightarrow$ NTLFUO2                                                                                                 | 1.00E-12                                 | Rickard and Pascoe (2009)  |
| G45452  | TrGAroC  | TLFUONE + O <sub>3</sub> $\rightarrow$ .5 CO + .5 OH + .5 MECOACETO2 + .3125 C24O3CCO2H + .1875 ACCOMECHO + .1875 H <sub>2</sub> O <sub>2</sub> | 8.00E-19                                 | see note*                  |
| G45453  | TrGAroC  | TLFUONE + OH $\rightarrow$ TLFUO2                                                                                                               | 6.90E-11                                 | Rickard and Pascoe (2009)  |
| G45454a | TrGAroC  | ACCOMECO3 + HO <sub>2</sub> $\rightarrow$ ACCOMECHO3H                                                                                           | KAPH02*(rco3_ooh+rco3_o3)                | Rickard and Pascoe (2009)  |
| G45454b | TrGAroC  | ACCOMECO3 + HO <sub>2</sub> $\rightarrow$ MECOACETO2 + CO <sub>2</sub> + OH                                                                     | KAPH02*rco3_oh                           | Rickard and Pascoe (2009)  |
| G45455  | TrGAroCN | ACCOMECO3 + NO $\rightarrow$ MECOACETO2 + CO <sub>2</sub> + NO <sub>2</sub>                                                                     | KAPNO                                    | Rickard and Pascoe (2009)  |
| G45456  | TrGAroCN | ACCOMECO3 + NO <sub>2</sub> $\rightarrow$ ACCOMECHAN                                                                                            | k_CH3CO3_NO2                             | Rickard and Pascoe (2009)* |
| G45457  | TrGAroCN | ACCOMECO3 + NO <sub>3</sub> $\rightarrow$ MECOACETO2 + CO <sub>2</sub> + NO <sub>2</sub>                                                        | KR02N03*1.74                             | Rickard and Pascoe (2009)  |
| G45458  | TrGAroC  | ACCOMECO3 $\rightarrow$ MECOACETO2 + CO <sub>2</sub>                                                                                            | k1_R02RCO3                               | Rickard and Pascoe (2009)  |
| G45459  | TrGAroC  | C4CO2DCO3H + OH $\rightarrow$ C4CO2DBC03                                                                                                        | 3.06E-11                                 | Rickard and Pascoe (2009)  |
| G45464  | TrGAroCN | ACCOMETCHO + NO <sub>3</sub> $\rightarrow$ ACCOMECHO3 + HNO <sub>3</sub>                                                                        | KN03AL*5.5                               | Rickard and Pascoe (2009)  |
| G45465  | TrGAroC  | ACCOMETCHO + OH $\rightarrow$ ACCOMECHO3                                                                                                        | 7.09E-11                                 | Rickard and Pascoe (2009)  |
| G45466  | TrGAroC  | MMALNHYOOH + OH $\rightarrow$ MMALANHYO2                                                                                                        | 1.69E-11                                 | Rickard and Pascoe (2009)  |
| G45467a | TrGAroC  | C5DICAROOH + OH $\rightarrow$ C5134CO2OH + OH                                                                                                   | 1.21E-10                                 | Rickard and Pascoe (2009)  |
| G45467b | TrGAroC  | C5DICAROOH + OH $\rightarrow$ C5DICARBO2                                                                                                        | 0.6*k_CH300H_OH                          | Rickard and Pascoe (2009)  |
| G45468  | TrGAroC  | C24O3CCO2H + OH $\rightarrow$ MECOACETO2 + CO <sub>2</sub>                                                                                      | 8.76E-13                                 | Rickard and Pascoe (2009)  |
| G45469  | TrGAroCN | NTLFUOOH + OH $\rightarrow$ NTLFUO2                                                                                                             | 4.44E-12                                 | Rickard and Pascoe (2009)  |
| G45470  | TrGAroCN | ACCOMEPAN + OH $\rightarrow$ METACETHO + CO + CO + NO <sub>2</sub>                                                                              | 1.00E-14                                 | Rickard and Pascoe (2009)  |
| G45471  | TrGAroCN | ACCOMEPAN $\rightarrow$ ACCOMECHO3 + NO <sub>2</sub>                                                                                            | k_PAN_M                                  | Rickard and Pascoe (2009)  |
| G45476a | TrGAroC  | TLFUO2 + HO <sub>2</sub> $\rightarrow$ TLFUOOH                                                                                                  | KR02H02(5)*(1-rcoch2o2_oh-rchohch2o2_oh) | Rickard and Pascoe (2009)  |
| G45476b | TrGAroC  | TLFUO2 + HO <sub>2</sub> $\rightarrow$ ACCOMECHO + HO <sub>2</sub> + OH                                                                         | KR02H02(5)*(rcoch2o2_oh+rchohch2o2_oh)   | Rickard and Pascoe (2009)* |
| G45477  | TrGAroCN | TLFUO2 + NO $\rightarrow$ ACCOMECHO + HO <sub>2</sub> + NO <sub>2</sub>                                                                         | KR02N0                                   | Rickard and Pascoe (2009)* |
| G45478  | TrGAroCN | TLFUO2 + NO <sub>3</sub> $\rightarrow$ ACCOMECHO + HO <sub>2</sub> + NO <sub>2</sub>                                                            | KR02N03                                  | Rickard and Pascoe (2009)* |
| G45479  | TrGAroC  | TLFUO2 $\rightarrow$ ACCOMECHO + HO <sub>2</sub>                                                                                                | k1_R02t0R02                              | Rickard and Pascoe (2009)* |
| G45480  | TrGAroC  | C5CO14OOH + OH $\rightarrow$ C5CO14O2                                                                                                           | 3.59E-12                                 | Rickard and Pascoe (2009)  |
| G45483  | TrGAroC  | TLFUOOH + OH $\rightarrow$ TLFUO2                                                                                                               | 2.53E-11                                 | Rickard and Pascoe (2009)  |
| G45485  | TrGAroC  | ACCOMECO3H + OH $\rightarrow$ ACCOMECHO3                                                                                                        | 3.59E-12                                 | Rickard and Pascoe (2009)  |
| G45486a | TrGAroC  | C5DIALO2 + HO <sub>2</sub> $\rightarrow$ C5DIALOOH                                                                                              | KR02H02(5)*(1-rcoch2o2_oh)               | Rickard and Pascoe (2009)  |

Table 1: Gas phase reactions (... continued)

| #       | labels   | reaction                                                                                               | rate coefficient                                    | reference                                      |
|---------|----------|--------------------------------------------------------------------------------------------------------|-----------------------------------------------------|------------------------------------------------|
| G45486b | TrGAroC  | $\text{C5DIALO2} + \text{HO}_2 \rightarrow \text{MALDIAL} + \text{CO} + \text{HO}_2 + \text{OH}$       | $\text{KR02H02(5)*rcoch2o2\_oh}$                    | Rickard and Pascoe (2009)*                     |
| G45487  | TrGAroCN | $\text{C5DIALO2} + \text{NO} \rightarrow \text{MALDIAL} + \text{CO} + \text{HO}_2 + \text{NO}_2$       | KR02N0                                              | Rickard and Pascoe (2009)*                     |
| G45488  | TrGAroCN | $\text{C5DIALO2} + \text{NO}_3 \rightarrow \text{MALDIAL} + \text{CO} + \text{HO}_2 + \text{NO}_2$     | KR02N03                                             | Rickard and Pascoe (2009)*                     |
| G45489  | TrGAroC  | $\text{C5DIALO2} \rightarrow \text{MALDIAL} + \text{CO} + \text{HO}_2$                                 | k1_R02s0R02                                         | Rickard and Pascoe (2009)*                     |
| G45490a | TrGAroC  | $\text{C5DICARBO2} + \text{HO}_2 \rightarrow \text{C5DICAROOH}$                                        | $\text{KR02H02(5)*(rco3\_ooh+rco3\_o3)}$            | Rickard and Pascoe (2009)                      |
| G45491b | TrGAroC  | $\text{C5DICARBO2} + \text{HO}_2 \rightarrow \text{MGLYOX} + \text{GLYOX} + \text{HO}_2 + \text{OH}$   | $\text{KR02H02(5)*rco3\_oh}$                        | Rickard and Pascoe (2009)*                     |
| G45492  | TrGAroCN | $\text{C5DICARBO2} + \text{NO} \rightarrow \text{MGLYOX} + \text{GLYOX} + \text{HO}_2 + \text{NO}_2$   | KR02N0                                              | Rickard and Pascoe (2009)*                     |
| G45493  | TrGAroCN | $\text{C5DICARBO2} + \text{NO}_3 \rightarrow \text{MGLYOX} + \text{GLYOX} + \text{HO}_2 + \text{NO}_2$ | KR02N03                                             | Rickard and Pascoe (2009)*                     |
| G45494  | TrGAroC  | $\text{C5DICARBO2} \rightarrow \text{MGLYOX} + \text{GLYOX} + \text{HO}_2$                             | k1_R02s0R02                                         | Rickard and Pascoe (2009)*                     |
| G46200a | TrGTerC  | $\text{CO235C6O2} + \text{HO}_2 \rightarrow \text{CO235C6OOH}$                                         | $\text{KR02H02(6)*rcoch2o2\_ooh}$                   | Rickard and Pascoe (2009), Taraborrelli (2016) |
| G46200b | TrGTerC  | $\text{CO235C6O2} + \text{HO}_2 \rightarrow \text{CO23C4CO3} + \text{HCHO} + \text{OH}$                | $\text{KR02H02(6)*rcoch2o2\_oh}$                    | Rickard and Pascoe (2009), Taraborrelli (2016) |
| G46201  | TrGTerCN | $\text{CO235C6O2} + \text{NO} \rightarrow \text{CO23C4CO3} + \text{HCHO} + \text{NO}_2$                | KR02N0                                              | Rickard and Pascoe (2009)*                     |
| G46202  | TrGTerC  | $\text{CO235C6O2} \rightarrow \text{CO23C4CO3} + \text{HCHO}$                                          | k1_R02p0R02                                         | Rickard and Pascoe (2009)                      |
| G46203  | TrGTerC  | $\text{CO235C6OOH} + \text{OH} \rightarrow \text{CO235C6O2}$                                           | 1.01E-11                                            | Rickard and Pascoe (2009)                      |
| G46204  | TrGTerC  | $\text{C614O2} \rightarrow \text{CO23C4CHO} + \text{HCHO} + \text{HO}_2$                               | k1_R02s0R02                                         | Rickard and Pascoe (2009)                      |
| G46205a | TrGTerCN | $\text{C614O2} + \text{NO} \rightarrow \text{CO23C4CHO} + \text{HCHO} + \text{HO}_2 + \text{NO}_2$     | $\text{KR02N0*(1.-alpha\_AN(9,2,0,1,0,temp,cair))}$ | Rickard and Pascoe (2009)                      |
| G46205b | TrGTerCN | $\text{C614O2} + \text{NO} \rightarrow \text{C614NO3}$                                                 | $\text{KR02N0*alpha\_AN(9,2,0,1,0,temp,cair)}$      | Rickard and Pascoe (2009)                      |
| G46206a | TrGTerC  | $\text{C614O2} + \text{HO}_2 \rightarrow \text{C614OOH}$                                               | $\text{KR02H02(6)*(1.-rchohch2o2\_oh)}$             | Rickard and Pascoe (2009), Taraborrelli (2016) |
| G46206b | TrGTerC  | $\text{C614O2} + \text{HO}_2 \rightarrow \text{CO23C4CHO} + \text{HCHO} + \text{HO}_2 + \text{OH}$     | $\text{KR02H02(6)*rchohch2o2\_oh}$                  | Rickard and Pascoe (2009), Taraborrelli (2016) |
| G46207  | TrGTerCN | $\text{C614NO3} + \text{OH} \rightarrow \text{C614CO} + \text{NO}_2$                                   | 7.11E-12                                            | Rickard and Pascoe (2009)                      |
| G46208  | TrGTerC  | $\text{C614OOH} + \text{OH} \rightarrow \text{C614CO} + \text{OH}$                                     | 8.69E-11                                            | Rickard and Pascoe (2009)                      |
| G46209  | TrGTerC  | $\text{C614CO} + \text{OH} \rightarrow \text{CO235C5CHO} + \text{HO}_2$                                | 3.22E-12                                            | Rickard and Pascoe (2009)                      |
| G46210  | TrGTerC  | $\text{CO235C5CHO} + \text{OH} \rightarrow \text{CO23C4CO3} + \text{CO}$                               | 1.33E-11                                            | Rickard and Pascoe (2009)                      |
| G46211  | TrGTerCN | $\text{CO235C5CHO} + \text{NO}_3 \rightarrow \text{CO23C4CO3} + \text{CO} + \text{HNO}_3$              | KN03AL*5.5                                          | Rickard and Pascoe (2009)                      |
| G46400  | TrGAroC  | $\text{PHENO OH} + \text{OH} \rightarrow \text{PHENO2}$                                                | 1.16E-10                                            | Rickard and Pascoe (2009)                      |

Table 1: Gas phase reactions (... continued)

| #       | labels   | reaction                                                                                                                        | rate coefficient                                           | reference                  |
|---------|----------|---------------------------------------------------------------------------------------------------------------------------------|------------------------------------------------------------|----------------------------|
| G46401  | TrGAroC  | $\text{C6CO4DB} + \text{OH} \rightarrow \text{CO} + \text{CO} + \text{HO}_2 + \text{CO} + \text{HCOCOCHO}$                      | 7.70E-11                                                   | Rickard and Pascoe (2009)  |
| G46402  | TrGAroC  | $\text{C5CO2DCO3H} + \text{OH} \rightarrow \text{C5CO2DBCO3}$                                                                   | 3.60E-11                                                   | Rickard and Pascoe (2009)  |
| G46403  | TrGAroCN | $\text{NDNPHENOOH} + \text{OH} \rightarrow \text{NDNPHENO2}$                                                                    | $0.6 \cdot k_{\text{CH300H\_OH}}$                          | Rickard and Pascoe (2009)  |
| G46404a | TrGAroC  | $\text{C615CO2O2} + \text{HO}_2 \rightarrow \text{C615CO2OOH}$                                                                  | $\text{KR02H02(6)} \cdot (1 - \text{rcoch2o2\_oh})$        | Rickard and Pascoe (2009)  |
| G46404b | TrGAroC  | $\text{C615CO2O2} + \text{HO}_2 \rightarrow \text{C5DICARB} + \text{CO} + \text{HO}_2 + \text{OH}$                              | $\text{KR02H02(6)} \cdot \text{rcoch2o2\_oh}$              | Rickard and Pascoe (2009)* |
| G46405  | TrGAroCN | $\text{C615CO2O2} + \text{NO} \rightarrow \text{C5DICARB} + \text{CO} + \text{HO}_2 + \text{NO}_2$                              | KR02N0                                                     | Rickard and Pascoe (2009)* |
| G46406  | TrGAroCN | $\text{C615CO2O2} + \text{NO}_3 \rightarrow \text{C5DICARB} + \text{CO} + \text{HO}_2 + \text{NO}_2$                            | KR02N03                                                    | Rickard and Pascoe (2009)* |
| G46407  | TrGAroC  | $\text{C615CO2O2} \rightarrow \text{C5DICARB} + \text{CO} + \text{HO}_2$                                                        | k1_R02s0R02                                                | Rickard and Pascoe (2009)* |
| G46408  | TrGAroCN | $\text{BZEMUCPAN} + \text{OH} \rightarrow \text{MALDIAL} + \text{CO} + \text{CO}_2 + \text{NO}_2$                               | 4.05E-11                                                   | Rickard and Pascoe (2009)  |
| G46409  | TrGAroCN | $\text{BZEMUCPAN} \rightarrow \text{BZEMUCCO3} + \text{NO}_2$                                                                   | k_PAN_M                                                    | Rickard and Pascoe (2009)  |
| G46410  | TrGAroCN | $\text{BZBIPERNO3} + \text{OH} \rightarrow \text{BZOBIPEROH} + \text{NO}_2$                                                     | 7.30E-11                                                   | Rickard and Pascoe (2009)  |
| G46411  | TrGAroCN | $\text{HOC6H4NO2} + \text{NO}_3 \rightarrow \text{NPHEN1O} + \text{HNO}_3$                                                      | 9.00E-14                                                   | Rickard and Pascoe (2009)  |
| G46412  | TrGAroCN | $\text{HOC6H4NO2} + \text{OH} \rightarrow \text{NPHEN1O}$                                                                       | 9.00E-13                                                   | Rickard and Pascoe (2009)  |
| G46413a | TrGAroCN | $\text{NDNPHENO2} + \text{HO}_2 \rightarrow \text{NDNPHENOOH}$                                                                  | $\text{KR02H02(6)} \cdot (1 - \text{rchohch2o2\_oh})$      | Rickard and Pascoe (2009)  |
| G46413b | TrGAroCN | $\text{NDNPHENO2} + \text{HO}_2 \rightarrow \text{NC4DCO2H} + \text{HNO}_3 + \text{CO} + \text{CO} + \text{NO}_2 + \text{OH}$   | $\text{KR02H02(6)} \cdot \text{rchohch2o2\_oh}$            | Rickard and Pascoe (2009)* |
| G46414  | TrGAroCN | $\text{NDNPHENO2} + \text{NO} \rightarrow \text{NC4DCO2H} + \text{HNO}_3 + \text{CO} + \text{CO} + \text{NO}_2 + \text{NO}_2$   | KR02N0                                                     | Rickard and Pascoe (2009)* |
| G46415  | TrGAroCN | $\text{NDNPHENO2} + \text{NO}_3 \rightarrow \text{NC4DCO2H} + \text{HNO}_3 + \text{CO} + \text{CO} + \text{NO}_2 + \text{NO}_2$ | KR02N03                                                    | Rickard and Pascoe (2009)* |
| G46416  | TrGAroCN | $\text{NDNPHENO2} \rightarrow \text{NC4DCO2H} + \text{HNO}_3 + \text{CO} + \text{CO} + \text{NO}_2$                             | k1_R02ISOPD02                                              | Rickard and Pascoe (2009)* |
| G46417  | TrGAroC  | $\text{PBZQCO} + \text{OH} \rightarrow \text{C5CO2OHCO3}$                                                                       | 6.07E-11                                                   | Rickard and Pascoe (2009)  |
| G46418  | TrGAroCN | $\text{CATECHOL} + \text{NO}_3 \rightarrow \text{CATEC1O} + \text{HNO}_3$                                                       | 9.9E-11                                                    | Rickard and Pascoe (2009)* |
| G46419  | TrGAroC  | $\text{CATECHOL} + \text{O}_3 \rightarrow \text{MALDALCO2H} + \text{HCOCO}_2\text{H} + \text{HO}_2 + \text{OH}$                 | 9.2E-18                                                    | Rickard and Pascoe (2009)  |
| G46420  | TrGAroC  | $\text{CATECHOL} + \text{OH} \rightarrow \text{CATEC1O}$                                                                        | 1.0E-10                                                    | Rickard and Pascoe (2009)  |
| G46421  | TrGAroC  | $\text{C5COOHCO3H} + \text{OH} \rightarrow \text{C5CO2OHCO3}$                                                                   | 8.01E-11                                                   | Rickard and Pascoe (2009)  |
| G46422  | TrGAroCN | $\text{NCATECHOL} + \text{NO}_3 \rightarrow \text{NNCATECO2}$                                                                   | 2.60E-12                                                   | Rickard and Pascoe (2009)  |
| G46423  | TrGAroCN | $\text{NCATECHOL} + \text{OH} \rightarrow \text{NCATECO2}$                                                                      | 3.47E-12                                                   | Rickard and Pascoe (2009)  |
| G46424a | TrGAroC  | $\text{C5CO2OHCO3} + \text{HO}_2 \rightarrow \text{C5COOHCO3H}$                                                                 | $\text{KAPH02} \cdot (\text{rco3\_ooh} + \text{rco3\_o3})$ | Rickard and Pascoe (2009)  |
| G46424b | TrGAroC  | $\text{C5CO2OHCO3} + \text{HO}_2 \rightarrow \text{HOCOC4DIAL} + \text{HO}_2 + \text{CO} + \text{CO}_2 + \text{OH}$             | $\text{KAPH02} \cdot \text{rco3\_oh}$                      | Rickard and Pascoe (2009)  |

Table 1: Gas phase reactions (... continued)

| #       | labels   | reaction                                                                                                                                                                                                                                       | rate coefficient             | reference                  |
|---------|----------|------------------------------------------------------------------------------------------------------------------------------------------------------------------------------------------------------------------------------------------------|------------------------------|----------------------------|
| G46425  | TrGAroCN | $\text{C5CO2OHCO3} + \text{NO} \rightarrow \text{HOCOC4DIAL} + \text{HO}_2 + \text{CO} + \text{CO}_2 + \text{NO}_2$                                                                                                                            | KAPNO                        | Rickard and Pascoe (2009)  |
| G46426  | TrGAroCN | $\text{C5CO2OHCO3} + \text{NO}_2 \rightarrow \text{C5CO2OHPAN}$                                                                                                                                                                                | k_CH3CO3_NO2                 | Rickard and Pascoe (2009)* |
| G46427  | TrGAroCN | $\text{C5CO2OHCO3} + \text{NO}_3 \rightarrow \text{HOCOC4DIAL} + \text{HO}_2 + \text{CO} + \text{CO}_2 + \text{NO}_2$                                                                                                                          | KR02N03*1.74                 | Rickard and Pascoe (2009)  |
| G46428  | TrGAroC  | $\text{C5CO2OHCO3} \rightarrow \text{HOCOC4DIAL} + \text{HO}_2 + \text{CO} + \text{CO}_2$                                                                                                                                                      | k1_R02RC03                   | Rickard and Pascoe (2009)  |
| G46429  | TrGAroCN | $\text{BZEPOXMUC} + \text{NO}_3 \rightarrow \text{BZEMUCCO3} + \text{HNO}_3$                                                                                                                                                                   | 2*KN03AL*2.75                | Rickard and Pascoe (2009)  |
| G46430  | TrGAroC  | $\text{BZEPOXMUC} + \text{O}_3 \rightarrow \text{EPXC4DIAL} + .125 \text{ HCHO} + .1125 \text{ HCOCO}_2\text{H} + .0675 \text{ GLYOX} + .0675 \text{ H}_2\text{O}_2 + .82 \text{ HO}_2 + .57 \text{ OH} + 1.265 \text{ CO} + .25 \text{ CO}_2$ | 2.00E-18                     | Rickard and Pascoe (2009)* |
| G46431  | TrGAroC  | $\text{BZEPOXMUC} + \text{OH} \rightarrow .31 \text{ BZEMUCCO3} + .69 \text{ BZEMUCO2}$                                                                                                                                                        | 6.08E-11                     | Rickard and Pascoe (2009)  |
| G46432a | TrGAroCN | $\text{NCATECO2} + \text{HO}_2 \rightarrow \text{NCATECOOH}$                                                                                                                                                                                   | KR02H02(6)*(1-rchohch2o2_oh) | Rickard and Pascoe (2009)  |
| G46432b | TrGAroCN | $\text{NCATECO2} + \text{HO}_2 \rightarrow \text{NC4DCO2H} + \text{HCOCO}_2\text{H} + \text{HO}_2 + \text{OH}$                                                                                                                                 | KR02H02(6)*rchohch2o2_oh     | Rickard and Pascoe (2009)* |
| G46433  | TrGAroCN | $\text{NCATECO2} + \text{NO} \rightarrow \text{NC4DCO2H} + \text{HCOCO}_2\text{H} + \text{HO}_2 + \text{NO}_2$                                                                                                                                 | KR02N0                       | Rickard and Pascoe (2009)* |
| G46434  | TrGAroCN | $\text{NCATECO2} + \text{NO}_3 \rightarrow \text{NC4DCO2H} + \text{HCOCO}_2\text{H} + \text{HO}_2 + \text{NO}_2$                                                                                                                               | KR02N03                      | Rickard and Pascoe (2009)* |
| G46435  | TrGAroCN | $\text{NCATECO2} \rightarrow \text{NC4DCO2H} + \text{HCOCO}_2\text{H} + \text{HO}_2$                                                                                                                                                           | k1_R02ISOPD02                | Rickard and Pascoe (2009)* |
| G46436  | TrGAroCN | $\text{NPHEN1OOH} + \text{OH} \rightarrow \text{NPHEN1O2}$                                                                                                                                                                                     | 9.00E-13                     | Rickard and Pascoe (2009)  |
| G46437a | TrGAroCN | $\text{NPHENO2} + \text{HO}_2 \rightarrow \text{NPHENOOH}$                                                                                                                                                                                     | KR02H02(6)*(1-rchohch2o2_oh) | Rickard and Pascoe (2009)  |
| G46437b | TrGAroCN | $\text{NPHENO2} + \text{HO}_2 \rightarrow \text{MALDALCO2H} + \text{GLYOX} + \text{NO}_2 + \text{OH}$                                                                                                                                          | KR02H02(6)*rchohch2o2_oh     | Rickard and Pascoe (2009)* |
| G46438  | TrGAroCN | $\text{NPHENO2} + \text{NO} \rightarrow \text{MALDALCO2H} + \text{GLYOX} + \text{NO}_2 + \text{NO}_2$                                                                                                                                          | KR02N0                       | Rickard and Pascoe (2009)* |
| G46439  | TrGAroCN | $\text{NPHENO2} + \text{NO}_3 \rightarrow \text{MALDALCO2H} + \text{GLYOX} + \text{NO}_2 + \text{NO}_2$                                                                                                                                        | KR02N03                      | Rickard and Pascoe (2009)* |
| G46440  | TrGAroCN | $\text{NPHENO2} \rightarrow \text{MALDALCO2H} + \text{GLYOX} + \text{NO}_2$                                                                                                                                                                    | k1_R02ISOPD02                | Rickard and Pascoe (2009)* |
| G46441  | TrGAroC  | $\text{BENZENE} + \text{OH} \rightarrow .352 \text{ BZBIPERO2} + .118 \text{ BZEPOXMUC} + .118 \text{ HO}_2 + .53 \text{ PHENOL} + .53 \text{ HO}_2$                                                                                           | 2.3E-12*EXP(-190/TEMP)       | Rickard and Pascoe (2009)* |
| G46442  | TrGAroCN | $\text{C5CO2OHPAN} + \text{OH} \rightarrow \text{HOCOC4DIAL} + \text{CO} + \text{CO} + \text{NO}_2$                                                                                                                                            | 7.66E-11                     | Rickard and Pascoe (2009)  |
| G46443  | TrGAroCN | $\text{C5CO2OHPAN} \rightarrow \text{C5CO2OHCO3} + \text{NO}_2$                                                                                                                                                                                | k_PAN_M                      | Rickard and Pascoe (2009)  |

Table 1: Gas phase reactions (... continued)

| #       | labels   | reaction                                                                                                | rate coefficient             | reference                                      |
|---------|----------|---------------------------------------------------------------------------------------------------------|------------------------------|------------------------------------------------|
| G46444  | TrGAroCN | CATEC1O + NO <sub>2</sub> → NCATECHOL                                                                   | k_C6H50_N02                  | Rickard and Pascoe (2009), Platz et al. (1998) |
| G46445  | TrGAroC  | CATEC1O + O <sub>3</sub> → CATEC1O2                                                                     | k_C6H50_03                   | Rickard and Pascoe (2009), Tao and Li (1999)   |
| G46446  | TrGAroC  | BZEMUCCO + OH → EPXDLCO3 + GLYOX                                                                        | 9.20E-11                     | Rickard and Pascoe (2009)                      |
| G46447a | TrGAroCN | NNCATECO2 + HO <sub>2</sub> → NNCATECOOH                                                                | KR02H02(6)*(1-rchohch2o2_oh) | Rickard and Pascoe (2009)                      |
| G46447b | TrGAroCN | NNCATECO2 + HO <sub>2</sub> → NC4DCO2H + HCOCO <sub>2</sub> H + NO <sub>2</sub> + OH                    | KR02H02(6)*rchohch2o2_oh     | Rickard and Pascoe (2009)*                     |
| G46448  | TrGAroCN | NNCATECO2 + NO → NC4DCO2H + HCOCO <sub>2</sub> H + NO <sub>2</sub> + NO <sub>2</sub>                    | KR02N0                       | Rickard and Pascoe (2009)*                     |
| G46449  | TrGAroCN | NNCATECO2 + NO <sub>3</sub> → NC4DCO2H + HCOCO <sub>2</sub> H + NO <sub>2</sub> + NO <sub>2</sub>       | KR02N03                      | Rickard and Pascoe (2009)*                     |
| G46450  | TrGAroCN | NNCATECO2 → NC4DCO2H + HCOCO <sub>2</sub> H + NO <sub>2</sub>                                           | k1_R02ISOPD02                | Rickard and Pascoe (2009)*                     |
| G46451  | TrGAroC  | BZEMUCCO2H + OH → C5DIALO2 + CO <sub>2</sub>                                                            | 4.06E-11                     | Rickard and Pascoe (2009)                      |
| G46452  | TrGAroCN | NNCATECOOH + OH → NNCATECO2                                                                             | 0.6*k_CH300H_OH              | Rickard and Pascoe (2009)                      |
| G46453  | TrGAroCN | NPHEN1O + NO <sub>2</sub> → DNPHEN                                                                      | k_C6H50_N02                  | Rickard and Pascoe (2009), Platz et al. (1998) |
| G46454  | TrGAroCN | NPHEN1O + O <sub>3</sub> → NPHEN1O2                                                                     | k_C6H50_03                   | Rickard and Pascoe (2009), Tao and Li (1999)   |
| G46455  | TrGAroCN | DNPHEN + NO <sub>3</sub> → NDNPHENO2                                                                    | 2.25E-15                     | Rickard and Pascoe (2009)                      |
| G46456  | TrGAroCN | DNPHEN + OH → DNPHENO2                                                                                  | 3.00E-14                     | Rickard and Pascoe (2009)                      |
| G46457  | TrGAroCN | PHENOL + NO <sub>3</sub> → .742 C6H5O + .742 HNO <sub>3</sub> + .258 NPHENO2                            | 3.8E-12                      | Rickard and Pascoe (2009)*                     |
| G46458  | TrGAroC  | PHENOL + OH → .06 C6H5O + .8 CATECHOL + .8 HO <sub>2</sub> + .14 PHENO2                                 | 4.7E-13*EXP(1220/TEMP)       | Rickard and Pascoe (2009)*                     |
| G46459  | TrGAroCN | PBZQONE + NO <sub>3</sub> → NBZQO2                                                                      | 3.00E-13                     | Rickard and Pascoe (2009)                      |
| G46460  | TrGAroC  | PBZQONE + OH → PBZQO2                                                                                   | 4.6E-12                      | Rickard and Pascoe (2009)                      |
| G46461a | TrGAroC  | PHENO2 + HO <sub>2</sub> → PHENOOH                                                                      | KR02H02(6)*(1-rchohch2o2_oh) | Rickard and Pascoe (2009)                      |
| G46461b | TrGAroC  | PHENO2 + HO <sub>2</sub> → .71 MALDALCO2H + .71 GLYOX + .29 PBZQONE + HO <sub>2</sub> + OH              | KR02H02(6)*rchohch2o2_oh     | Rickard and Pascoe (2009)*                     |
| G46462  | TrGAroCN | PHENO2 + NO → .71 MALDALCO2H + .71 GLYOX + .29 PBZQONE + HO <sub>2</sub> + NO <sub>2</sub>              | KR02N0                       | Rickard and Pascoe (2009)*                     |
| G46463  | TrGAroCN | PHENO2 + NO <sub>3</sub> → .71 MALDALCO2H + .71 GLYOX + .29 PBZQONE + HO <sub>2</sub> + NO <sub>2</sub> | KR02N03                      | Rickard and Pascoe (2009)*                     |

Table 1: Gas phase reactions (... continued)

| #       | labels   | reaction                                                                                                       | rate coefficient                         | reference                                       |
|---------|----------|----------------------------------------------------------------------------------------------------------------|------------------------------------------|-------------------------------------------------|
| G46464  | TrGAroC  | PHENO2 $\rightarrow$ .71 MALDALCO2H + .71 GLYOX + .29 PBZQONE + HO <sub>2</sub>                                | k1_R02ISOPD02                            | Rickard and Pascoe (2009)*                      |
| G46465  | TrGAroC  | C615CO2OOH + OH $\rightarrow$ C6125CO + OH                                                                     | 9.42E-11                                 | Rickard and Pascoe (2009)                       |
| G46466a | TrGAroC  | C5CO2DBCO3 + HO <sub>2</sub> $\rightarrow$ C5CO2DCO3H                                                          | KAPH02*(rco3_ooh+rco3_o3)                | Rickard and Pascoe (2009)                       |
| G46466b | TrGAroC  | C5CO2DBCO3 + HO <sub>2</sub> $\rightarrow$ CH <sub>3</sub> C(O) + HCOCOCHO + CO <sub>2</sub> + OH              | KAPH02*rco3_oh                           | Rickard and Pascoe (2009)                       |
| G46467  | TrGAroCN | C5CO2DBCO3 + NO $\rightarrow$ CH <sub>3</sub> C(O) + HCOCOCHO + CO <sub>2</sub> + NO <sub>2</sub>              | KAPN0                                    | Rickard and Pascoe (2009)                       |
| G46468  | TrGAroCN | C5CO2DBCO3 + NO <sub>2</sub> $\rightarrow$ C5CO2DBPAN                                                          | k_CH3CO3_NO2                             | Rickard and Pascoe (2009)*                      |
| G46469  | TrGAroCN | C5CO2DBCO3 + NO <sub>3</sub> $\rightarrow$ CH <sub>3</sub> C(O) + HCOCOCHO + CO <sub>2</sub> + NO <sub>2</sub> | KR02N03*1.74                             | Rickard and Pascoe (2009)                       |
| G46470  | TrGAroC  | C5CO2DBCO3 $\rightarrow$ CH <sub>3</sub> C(O) + HCOCOCHO + CO <sub>2</sub>                                     | k1_R02RCO3                               | Rickard and Pascoe (2009)                       |
| G46471  | TrGAroCN | NPHEN1O2 + HO <sub>2</sub> $\rightarrow$ NPHEN1OOH                                                             | KR02H02(6)                               | Rickard and Pascoe (2009)                       |
| G46472a | TrGAroCN | NPHEN1O2 + NO $\rightarrow$ NPHEN1O + NO <sub>2</sub>                                                          | KR02N0                                   | Rickard and Pascoe (2009)                       |
| G46472b | TrGAroCN | NPHEN1O2 + NO <sub>2</sub> $\rightarrow$ NPHEN1O + NO <sub>3</sub>                                             | k_C6H5O2_NO2                             | Jagiella and Zabel (2007)*                      |
| G46473  | TrGAroCN | NPHEN1O2 + NO <sub>3</sub> $\rightarrow$ NPHEN1O + NO <sub>2</sub>                                             | KR02N03                                  | Rickard and Pascoe (2009)                       |
| G46474  | TrGAroCN | NPHEN1O2 $\rightarrow$ NPHEN1O                                                                                 | k1_R02sR02                               | Rickard and Pascoe (2009)                       |
| G46475  | TrGAroCN | NPHENOOH + OH $\rightarrow$ NPHENO2                                                                            | 1.07E-10                                 | Rickard and Pascoe (2009)                       |
| G46476  | TrGAroCN | C6H5O + NO <sub>2</sub> $\rightarrow$ HOC6H4NO2                                                                | k_C6H5O_NO2                              | Rickard and Pascoe (2009), Platz et al. (1998)* |
| G46477  | TrGAroC  | C6H5O + O <sub>3</sub> $\rightarrow$ C6H5O2                                                                    | k_C6H5O_O3                               | Rickard and Pascoe (2009), Tao and Li (1999)    |
| G46478  | TrGAroCN | NCATECOOH + OH $\rightarrow$ NCATECO2                                                                          | 0.6*k_CH300H_OH                          | Rickard and Pascoe (2009)                       |
| G46479  | TrGAroC  | PBZQOOH + OH $\rightarrow$ PBZQCO + OH                                                                         | 1.23E-10                                 | Rickard and Pascoe (2009)                       |
| G46480a | TrGAroC  | PBZQO2 + HO <sub>2</sub> $\rightarrow$ PBZQOOH                                                                 | KR02H02(6)*(1-rchohch2o2_oh-rcoch2o2_oh) | Rickard and Pascoe (2009)                       |
| G46480b | TrGAroC  | PBZQO2 + HO <sub>2</sub> $\rightarrow$ C5CO2OHCO3 + OH                                                         | KR02H02(6)*(rchohch2o2_oh+rcoch2o2_oh)   | Rickard and Pascoe (2009)*                      |
| G46481  | TrGAroCN | PBZQO2 + NO $\rightarrow$ C5CO2OHCO3 + NO <sub>2</sub>                                                         | KR02N0                                   | Rickard and Pascoe (2009)*                      |
| G46482  | TrGAroCN | PBZQO2 + NO <sub>3</sub> $\rightarrow$ C5CO2OHCO3 + NO <sub>2</sub>                                            | KR02N03                                  | Rickard and Pascoe (2009)*                      |
| G46483  | TrGAroC  | PBZQO2 $\rightarrow$ C5CO2OHCO3                                                                                | k1_R02sOR02                              | Rickard and Pascoe (2009)*                      |
| G46484  | TrGAroC  | BZOBIPEROH + OH $\rightarrow$ MALDIALCO3 + GLYOX                                                               | 8.16E-11                                 | Rickard and Pascoe (2009)                       |
| G46485a | TrGAroCN | DNPHENO2 + HO <sub>2</sub> $\rightarrow$ DNPHENOOH                                                             | KR02H02(6)*(1-rchohch2o2_oh)             | Rickard and Pascoe (2009)                       |
| G46485b | TrGAroCN | DNPHENO2 + HO <sub>2</sub> $\rightarrow$ NC4DCO2H + HCOCO <sub>2</sub> H + NO <sub>2</sub> + OH                | KR02H02(6)*rchohch2o2_oh                 | Rickard and Pascoe (2009)*                      |

Table 1: Gas phase reactions (... continued)

| #       | labels   | reaction                                                                                                                    | rate coefficient                               | reference                  |
|---------|----------|-----------------------------------------------------------------------------------------------------------------------------|------------------------------------------------|----------------------------|
| G46486  | TrGAroCN | DNPHEO2 + NO → NC4DCO2H + HCOCO <sub>2</sub> H + NO <sub>2</sub><br>+ NO <sub>2</sub>                                       | KR02N0                                         | Rickard and Pascoe (2009)* |
| G46487  | TrGAroCN | DNPHEO2 + NO <sub>3</sub> → NC4DCO2H + HCOCO <sub>2</sub> H + NO <sub>2</sub><br>+ NO <sub>2</sub>                          | KR02N03                                        | Rickard and Pascoe (2009)* |
| G46488  | TrGAroCN | DNPHEO2 → NC4DCO2H + HCOCO <sub>2</sub> H + NO <sub>2</sub>                                                                 | k1_R02IS0PD02                                  | Rickard and Pascoe (2009)* |
| G46489  | TrGAroC  | BZBIPEROOH + OH → BZOBIPEROH + OH                                                                                           | 9.77E-11                                       | Rickard and Pascoe (2009)  |
| G46490a | TrGAroC  | BZEMUCO2 + HO <sub>2</sub> → BZEMUCOOH                                                                                      | KR02H02(6)                                     | Rickard and Pascoe (2009)  |
| G46490b | TrGAroC  | BZEMUCO2 + HO <sub>2</sub> → .5 EPXC4DIAL + .5 GLYOX + .5<br>HO <sub>2</sub> + .5 C3DIALO2 + .5 C32OH13CO + OH              | KR02H02(6)                                     | Rickard and Pascoe (2009)* |
| G46491a | TrGAroCN | BZEMUCO2 + NO → BZEMUCNO3                                                                                                   | KR02N0*alpha_AN(10,2,0,1,0,<br>temp,cair)      | Rickard and Pascoe (2009)  |
| G46491b | TrGAroCN | BZEMUCO2 + NO → .5 EPXC4DIAL + .5 GLYOX + .5<br>HO <sub>2</sub> + .5 C3DIALO2 + .5 C32OH13CO + NO <sub>2</sub>              | KR02N0*(1.-alpha_AN(10,2,0,1,0,<br>temp,cair)) | Rickard and Pascoe (2009)* |
| G46492  | TrGAroCN | BZEMUCO2 + NO <sub>3</sub> → .5 EPXC4DIAL + .5 GLYOX + .5<br>HO <sub>2</sub> + .5 C3DIALO2 + .5 C32OH13CO + NO <sub>2</sub> | KR02N03                                        | Rickard and Pascoe (2009)* |
| G46493  | TrGAroC  | BZEMUCO2 → .5 EPXC4DIAL + .5 GLYOX + .5 HO <sub>2</sub> +<br>.5 C3DIALO2 + .5 C32OH13CO                                     | k1_R02s0R02                                    | Rickard and Pascoe (2009)* |
| G46494  | TrGAroCN | C5CO2DBPAN + OH → HCOCOCHO + CH <sub>3</sub> CHO + CO <sub>2</sub><br>+ NO <sub>2</sub>                                     | 3.28E-11                                       | Rickard and Pascoe (2009)  |
| G46495  | TrGAroCN | C5CO2DBPAN → C5CO2DBCO3 + NO <sub>2</sub>                                                                                   | k_PAN_M                                        | Rickard and Pascoe (2009)  |
| G46496  | TrGAroCN | NBZQOOH + OH → NBZQO2                                                                                                       | 6.68E-11                                       | Rickard and Pascoe (2009)  |
| G46497  | TrGAroC  | CATEC1OOH + OH → CATEC1O2                                                                                                   | .6*k_CH300H_OH                                 | Rickard and Pascoe (2009)  |
| G46498  | TrGAroC  | C6125CO + OH → C5CO14O2 + CO                                                                                                | 6.45E-11                                       | Rickard and Pascoe (2009)  |
| G46499a | TrGAroCN | NBZQO2 + HO <sub>2</sub> → NBZQOOH                                                                                          | KR02H02(6)*(1-rcoch2o2_oh)                     | Rickard and Pascoe (2009)  |
| G46499b | TrGAroCN | NBZQO2 + HO <sub>2</sub> → C6CO4DB + NO <sub>2</sub> + OH                                                                   | KR02H02(6)*rcoch2o2_oh                         | Rickard and Pascoe (2009)* |
| G46500  | TrGAroCN | NBZQO2 + NO → C6CO4DB + NO <sub>2</sub> + NO <sub>2</sub>                                                                   | KR02N0                                         | Rickard and Pascoe (2009)* |
| G46501  | TrGAroCN | NBZQO2 + NO <sub>3</sub> → C6CO4DB + NO <sub>2</sub> + NO <sub>2</sub>                                                      | KR02N03                                        | Rickard and Pascoe (2009)* |
| G46502  | TrGAroCN | NBZQO2 → C6CO4DB + NO <sub>2</sub>                                                                                          | k1_R02s0R02                                    | Rickard and Pascoe (2009)* |
| G46503  | TrGAroCN | DNPHEOOH + OH → DNPHEO2                                                                                                     | 0.6*k_CH300H_OH                                | Rickard and Pascoe (2009)  |
| G46504  | TrGAroC  | CATEC1O2 + HO <sub>2</sub> → CATEC1OOH                                                                                      | KR02H02(6)                                     | Rickard and Pascoe (2009)  |
| G46505a | TrGAroCN | CATEC1O2 + NO → CATEC1O + NO <sub>2</sub>                                                                                   | KR02N0                                         | Rickard and Pascoe (2009)  |
| G46505b | TrGAroCN | CATEC1O2 + NO <sub>2</sub> → CATEC1O + NO <sub>3</sub>                                                                      | K_C6H502_N02                                   | Jagiella and Zabel (2007)* |
| G46506  | TrGAroCN | CATEC1O2 + NO <sub>3</sub> → CATEC1O + NO <sub>2</sub>                                                                      | KR02N03                                        | Rickard and Pascoe (2009)  |
| G46507  | TrGAroC  | CATEC1O2 → CATEC1O                                                                                                          | k1_R02s0R02                                    | Rickard and Pascoe (2009)  |
| G46508  | TrGAroC  | BZEMUCCO3H + OH → BZEMUCCO3                                                                                                 | 4.37E-11                                       | Rickard and Pascoe (2009)  |

Table 1: Gas phase reactions (... continued)

| #       | labels   | reaction                                                                                                                           | rate coefficient                              | reference                                               |
|---------|----------|------------------------------------------------------------------------------------------------------------------------------------|-----------------------------------------------|---------------------------------------------------------|
| G46509  | TrGAroC  | $\text{C6H5OOH} + \text{OH} \rightarrow \text{C6H5O2}$                                                                             | 3.60E-12                                      | Rickard and Pascoe (2009)                               |
| G46510  | TrGAroC  | $\text{BZEMUCOOH} + \text{OH} \rightarrow \text{BZEMUCCO} + \text{OH}$                                                             | 1.31E-10                                      | Rickard and Pascoe (2009)                               |
| G46511a | TrGAroC  | $\text{BZEMUCCO3} + \text{HO}_2 \rightarrow \text{BZEMUCCO2H} + \text{O}_3$                                                        | KAPH02*rco3_o3                                | Rickard and Pascoe (2009)                               |
| G46511b | TrGAroC  | $\text{BZEMUCCO3} + \text{HO}_2 \rightarrow \text{BZEMUCCO3H}$                                                                     | KAPH02*rco3_ooh                               | Rickard and Pascoe (2009)                               |
| G46511c | TrGAroC  | $\text{BZEMUCCO3} + \text{HO}_2 \rightarrow \text{C5DIALO2} + \text{CO}_2 + \text{OH}$                                             | KAPH02*rco3_oh                                | Rickard and Pascoe (2009)                               |
| G46512  | TrGAroCN | $\text{BZEMUCCO3} + \text{NO} \rightarrow \text{C5DIALO2} + \text{CO}_2 + \text{NO}_2$                                             | KAPNO                                         | Rickard and Pascoe (2009)                               |
| G46513  | TrGAroCN | $\text{BZEMUCCO3} + \text{NO}_2 \rightarrow \text{BZEMUCPAN}$                                                                      | k_CH3CO3_NO2                                  | Rickard and Pascoe (2009)                               |
| G46514  | TrGAroCN | $\text{BZEMUCCO3} + \text{NO}_3 \rightarrow \text{C5DIALO2} + \text{CO}_2 + \text{NO}_2$                                           | KR02N03*1.74                                  | Rickard and Pascoe (2009)                               |
| G46515  | TrGAroC  | $\text{BZEMUCCO3} \rightarrow \text{C5DIALO2} + \text{CO}_2$                                                                       | k1_R02RCO3                                    | Rickard and Pascoe (2009)*                              |
| G46516  | TrGAroC  | $\text{C6H5O2} + \text{HO}_2 \rightarrow \text{C6H5OOH}$                                                                           | KR02H02(6)                                    | Rickard and Pascoe (2009)                               |
| G46517a | TrGAroCN | $\text{C6H5O2} + \text{NO} \rightarrow \text{C6H5O} + \text{NO}_2$                                                                 | KR02N0                                        | Rickard and Pascoe (2009)                               |
| G46517b | TrGAroCN | $\text{C6H5O2} + \text{NO}_2 \rightarrow \text{C6H5O} + \text{NO}_3$                                                               | K_C6H5O2_NO2                                  | Jagiella and Zabel (2007)*                              |
| G46518  | TrGAroCN | $\text{C6H5O2} + \text{NO}_3 \rightarrow \text{C6H5O} + \text{NO}_2$                                                               | KR02N03                                       | Rickard and Pascoe (2009)                               |
| G46519  | TrGAroC  | $\text{C6H5O2} \rightarrow \text{C6H5O}$                                                                                           | k1_R02sR02                                    | Rickard and Pascoe (2009)                               |
| G46521  | TrGAroCN | $\text{BZEMUCNO3} + \text{OH} \rightarrow \text{BZEMUCCO} + \text{NO}_2$                                                           | 4.38E-11                                      | Rickard and Pascoe (2009)                               |
| G46522a | TrGAroC  | $\text{BZBIPERO2} + \text{HO}_2 \rightarrow \text{BZBIPEROOH}$                                                                     | KR02H02(6)*(1.-rbipero2_oh)                   | Rickard and Pascoe (2009)                               |
| G46522b | TrGAroC  | $\text{BZBIPERO2} + \text{HO}_2 \rightarrow \text{OH} + \text{GLYOX} + \text{HO}_2 + .5$<br>$\text{BZFUONE} + .5 \text{BZFUONE}$   | KR02H02(6)*rbipero2_oh                        | Rickard and Pascoe (2009), Bird-<br>sall et al. (2010)* |
| G46523a | TrGAroCN | $\text{BZBIPERO2} + \text{NO} \rightarrow \text{BZBIPERNO3}$                                                                       | KR02N0*alpha_AN(9,2,0,0,1,temp,<br>cair)      | Rickard and Pascoe (2009)                               |
| G46523b | TrGAroCN | $\text{BZBIPERO2} + \text{NO} \rightarrow \text{NO}_2 + \text{GLYOX} + \text{HO}_2 + .5$<br>$\text{BZFUONE} + .5 \text{BZFUONE}$   | KR02N0*(1.-alpha_AN(9,2,0,0,1,<br>temp,cair)) | Rickard and Pascoe (2009)*                              |
| G46524  | TrGAroCN | $\text{BZBIPERO2} + \text{NO}_3 \rightarrow \text{NO}_2 + \text{GLYOX} + \text{HO}_2 + .5$<br>$\text{BZFUONE} + .5 \text{BZFUONE}$ | KR02N03                                       | Rickard and Pascoe (2009)*                              |
| G46525  | TrGAroC  | $\text{BZBIPERO2} \rightarrow \text{GLYOX} + \text{HO}_2 + \text{BZFUONE}$                                                         | k1_R02sOR02                                   | Rickard and Pascoe (2009)*                              |
| G47200  | TrGTerCN | $\text{CO235C6CHO} + \text{NO}_3 \rightarrow \text{CO235C6CO3} + \text{HNO}_3$                                                     | KN03AL*5.5                                    | Rickard and Pascoe (2009)                               |
| G47201  | TrGTerC  | $\text{CO235C6CHO} + \text{OH} \rightarrow \text{CO235C6CO3}$                                                                      | 6.70E-11                                      | Rickard and Pascoe (2009)                               |
| G47202a | TrGTerC  | $\text{CO235C6CO3} + \text{HO}_2 \rightarrow \text{C235C6CO3H}$                                                                    | KAPH02*(rco3_ooh+rco3_o3)                     | Rickard and Pascoe (2009)                               |
| G47202b | TrGTerC  | $\text{CO235C6CO3} + \text{HO}_2 \rightarrow \text{CO235C6O2} + \text{CO}_2 + \text{OH}$                                           | KAPH02*rco3_oh                                | Rickard and Pascoe (2009)                               |
| G47203  | TrGTerCN | $\text{CO235C6CO3} + \text{NO} \rightarrow \text{CO235C6O2} + \text{CO}_2 + \text{NO}_2$                                           | KAPNO                                         | Rickard and Pascoe (2009)                               |
| G47204  | TrGTerCN | $\text{CO235C6CO3} + \text{NO}_2 \rightarrow \text{C7PAN3}$                                                                        | k_CH3CO3_NO2                                  | Rickard and Pascoe (2009)                               |
| G47205  | TrGTerC  | $\text{CO235C6CO3} \rightarrow \text{CO235C6O2} + \text{CO}_2$                                                                     | k1_R02RCO3                                    | Rickard and Pascoe (2009)                               |
| G47206  | TrGTerC  | $\text{C235C6CO3H} + \text{OH} \rightarrow \text{CO235C6CO3}$                                                                      | 4.75E-12                                      | Rickard and Pascoe (2009)                               |
| G47207  | TrGTerCN | $\text{C7PAN3} + \text{OH} \rightarrow \text{CO235C5CHO} + \text{CO} + \text{NO}_2$                                                | 8.83E-13                                      | Rickard and Pascoe (2009)                               |
| G47208  | TrGTerCN | $\text{C7PAN3} \rightarrow \text{CO235C6CO3} + \text{NO}_2$                                                                        | k_PAN_M                                       | Rickard and Pascoe (2009)                               |

Table 1: Gas phase reactions (... continued)

| #       | labels   | reaction                                                                                                                                              | rate coefficient                               | reference                                      |
|---------|----------|-------------------------------------------------------------------------------------------------------------------------------------------------------|------------------------------------------------|------------------------------------------------|
| G47209a | TrGTerC  | $C716O2 + HO_2 \rightarrow C716OOH$                                                                                                                   | $KR02H02(7)*rcoch2o2\_ooh$                     | Rickard and Pascoe (2009), Taraborrelli (2016) |
| G47209b | TrGTerC  | $C716O2 + HO_2 \rightarrow CO13C4CHO + CH_3C(O) + OH$                                                                                                 | $KR02H02(7)*rcoch2o2\_oh$                      | Rickard and Pascoe (2009), Taraborrelli (2016) |
| G47210  | TrGTerCN | $C716O2 + NO \rightarrow CO13C4CHO + CH_3C(O) + NO_2$                                                                                                 | KR02N0                                         | Rickard and Pascoe (2009)*                     |
| G47211  | TrGTerC  | $C716O2 \rightarrow CO13C4CHO + CH_3C(O)$                                                                                                             | k1_R02s0R02                                    | Rickard and Pascoe (2009)                      |
| G47212  | TrGTerC  | $C716OOH + OH \rightarrow CO235C6CHO + OH$                                                                                                            | 1.20E-10                                       | Rickard and Pascoe (2009)                      |
| G47213  | TrGTerC  | $C721O2 + HO_2 \rightarrow C721OOH$                                                                                                                   | KR02H02(7)                                     | Rickard and Pascoe (2009)                      |
| G47214  | TrGTerCN | $C721O2 + NO \rightarrow C722O2 + NO_2$                                                                                                               | KR02N0                                         | Rickard and Pascoe (2009)*                     |
| G47215  | TrGTerC  | $C721O2 \rightarrow C722O2$                                                                                                                           | k1_R02pR02                                     | Rickard and Pascoe (2009)                      |
| G47216  | TrGTerC  | $C721OOH + OH \rightarrow C721O2$                                                                                                                     | 1.27E-11                                       | Rickard and Pascoe (2009)                      |
| G47217  | TrGTerC  | $C722O2 + HO_2 \rightarrow C722OOH$                                                                                                                   | KR02H02(7)                                     | Rickard and Pascoe (2009)                      |
| G47218  | TrGTerCN | $C722O2 + NO \rightarrow CH_3COCH_3 + C44O2 + NO_2$                                                                                                   | KR02N0                                         | Rickard and Pascoe (2009)*                     |
| G47219  | TrGTerC  | $C722O2 \rightarrow CH_3COCH_3 + C44O2$                                                                                                               | k1_R02tR02                                     | Rickard and Pascoe (2009)                      |
| G47220  | TrGTerC  | $C722OOH + OH \rightarrow C722O2$                                                                                                                     | 3.31E-11                                       | Rickard and Pascoe (2009)                      |
| G47221  | TrGTerC  | $ROO6R3O2 \rightarrow ROO6R5O2$                                                                                                                       | $5.68E10*EXP(-8745./TEMP)$                     | Vereecken and Peeters (2012)                   |
| G47222  | TrGTerCN | $ROO6R3O2 + NO \rightarrow ROO6R3O + NO_2$                                                                                                            | KR02N0                                         | Vereecken and Peeters (2012)*                  |
| G47223  | TrGTerC  | $ROO6R3O2 + HO_2 \rightarrow 7\text{ L CARBON}$                                                                                                       | KR02H02(7)                                     | Vereecken and Peeters (2012)*                  |
| G47224  | TrGTerC  | $ROO6R3O2 \rightarrow ROO6R3O$                                                                                                                        | k1_R02sR02                                     | Vereecken and Peeters (2012)                   |
| G47225  | TrGTerC  | $ROO6R3O \rightarrow 7\text{ L CARBON} + HO_2$                                                                                                        | $5.7E10*EXP(-2949./TEMP)$                      | Vereecken and Peeters (2012)*                  |
| G47226  | TrGTerC  | $ROO6R5O2 \rightarrow 7\text{ L CARBON} + OH$                                                                                                         | $9.17E10*EXP(-8706./TEMP)$                     | Vereecken and Peeters (2012)*                  |
| G47400  | TrGAroC  | $TOLUENE + OH \rightarrow .07\text{ C6H5CH2O2} + .18\text{ CRESOL} + .18\text{ HO}_2 + .65\text{ TLBIPERO2} + .10\text{ TLEPOXMUC} + .10\text{ HO}_2$ | $1.8E-12*EXP(340/TEMP)$                        | Rickard and Pascoe (2009)*                     |
| G47401  | TrGAroC  | $C6H5CH2O2 + HO_2 \rightarrow C6H5CH2OOH$                                                                                                             | $1.5E-13*EXP(1310/TEMP)$                       | Rickard and Pascoe (2009)                      |
| G47402a | TrGAroCN | $C6H5CH2O2 + NO \rightarrow C6H5CH2NO3$                                                                                                               | $KR02N0*\alpha\_AN(7,1,0,0,0,temp, cair)$      | Rickard and Pascoe (2009)*                     |
| G47402b | TrGAroCN | $C6H5CH2O2 + NO \rightarrow BENZAL + HO_2 + NO_2$                                                                                                     | $KR02N0*(1.-\alpha\_AN(7,1,0,0,0,temp, cair))$ | Rickard and Pascoe (2009)*                     |
| G47403  | TrGAroCN | $C6H5CH2O2 + NO_3 \rightarrow BENZAL + HO_2 + NO_2$                                                                                                   | KR02N03                                        | Rickard and Pascoe (2009)*                     |
| G47404  | TrGAroC  | $C6H5CH2O2 \rightarrow BENZAL + HO_2$                                                                                                                 | $2*(k\_CH302*2.4E-14*EXP(1620./TEMP))*0.5*R02$ | Rickard and Pascoe (2009)*                     |
| G47405  | TrGAroCN | $CRESOL + NO_3 \rightarrow .103\text{ CRESO2} + .103\text{ HNO}_3 + .506\text{ NCRESO2} + .391\text{ TOL1O} + .391\text{ HNO}_3$                      | 1.4E-11                                        | Rickard and Pascoe (2009)*                     |

Table 1: Gas phase reactions (... continued)

| #       | labels   | reaction                                                                                                                                                                                                                                                                  | rate coefficient                           | reference                                           |
|---------|----------|---------------------------------------------------------------------------------------------------------------------------------------------------------------------------------------------------------------------------------------------------------------------------|--------------------------------------------|-----------------------------------------------------|
| G47406  | TrGAroC  | CRESOL + OH $\rightarrow$ .2 CRESO2 + .727 MCATECHOL + .727 HO <sub>2</sub> + .073 TOL1O                                                                                                                                                                                  | 4.65E-11                                   | Rickard and Pascoe (2009)*                          |
| G47407a | TrGAroC  | TLBIPERO2 + HO <sub>2</sub> $\rightarrow$ TLBIPEROOH                                                                                                                                                                                                                      | KR02H02(7)*(1.-rbipero2_oh)                | Rickard and Pascoe (2009)                           |
| G47407b | TrGAroC  | TLBIPERO2 + HO <sub>2</sub> $\rightarrow$ OH + .6 GLYOX + .4 MGLYOX + HO <sub>2</sub> + .2 ZCODC23DBCOD + .2 C5DICARB + .2 TLFUONE + .2 BZFUONE + .2 MALDIAL                                                                                                              | KR02H02(7)*rbipero2_oh                     | Rickard and Pascoe (2009), Bird-sall et al. (2010)* |
| G47408a | TrGAroCN | TLBIPERO2 + NO $\rightarrow$ NO <sub>2</sub> + .6 GLYOX + .4 MGLYOX + HO <sub>2</sub> + .2 ZCODC23DBCOD + .2 C5DICARB + .2 TLFUONE + .2 BZFUONE + .2 MALDIAL                                                                                                              | KR02N0*(1.-alpha_AN(11,2,0,0,1,temp,cair)) | Rickard and Pascoe (2009)*                          |
| G47408b | TrGAroCN | TLBIPERO2 + NO $\rightarrow$ TLBIPERNO3                                                                                                                                                                                                                                   | KR02N0*alpha_AN(11,2,0,0,1,temp,cair)      | Rickard and Pascoe (2009)*                          |
| G47409  | TrGAroCN | TLBIPERO2 + NO <sub>3</sub> $\rightarrow$ NO <sub>2</sub> + .6 GLYOX + .4 MGLYOX + HO <sub>2</sub> + .2 ZCODC23DBCOD + .2 C5DICARB + .2 TLFUONE + .2 BZFUONE + .2 MALDIAL                                                                                                 | KR02N03                                    | Rickard and Pascoe (2009)*                          |
| G47410  | TrGAroC  | TLBIPERO2 $\rightarrow$ .6 GLYOX + .4 MGLYOX + HO <sub>2</sub> + .2 ZCODC23DBCOD + .2 C5DICARB + .2 TLFUONE + .2 BZFUONE + .2 MALDIAL                                                                                                                                     | k1_R02s0R02                                | Rickard and Pascoe (2009)*                          |
| G47411  | TrGAroCN | TLEPOXMUC + NO <sub>3</sub> $\rightarrow$ TLEMUCCO3 + HNO <sub>3</sub>                                                                                                                                                                                                    | KN03AL*2.75                                | Rickard and Pascoe (2009)                           |
| G47412  | TrGAroC  | TLEPOXMUC + O <sub>3</sub> $\rightarrow$ EPXC4DIAL + .125 CH <sub>3</sub> CHO + .695 CH <sub>3</sub> C(O) + .57 CO + .57 OH + .125 HO <sub>2</sub> + .1125 CH <sub>3</sub> COCO <sub>2</sub> H + .0675 MGLYOX + .0675 H <sub>2</sub> O <sub>2</sub> + .25 CO <sub>2</sub> | 5.00E-18                                   | Rickard and Pascoe (2009)*                          |
| G47413  | TrGAroC  | TLEPOXMUC + OH $\rightarrow$ .31 TLEMUCCO3 + .69 TLEMUCO2                                                                                                                                                                                                                 | 7.99E-11                                   | Rickard and Pascoe (2009)*                          |
| G47414  | TrGAroC  | C6H5CH2OOH + OH $\rightarrow$ BENZAL + OH                                                                                                                                                                                                                                 | 2.05E-11                                   | Rickard and Pascoe (2009)                           |
| G47415  | TrGAroCN | C6H5CH2NO3 + OH $\rightarrow$ BENZAL + NO <sub>2</sub>                                                                                                                                                                                                                    | 6.03E-12                                   | Rickard and Pascoe (2009)                           |
| G47416  | TrGAroCN | BENZAL + NO <sub>3</sub> $\rightarrow$ C6H5CO3 + HNO <sub>3</sub>                                                                                                                                                                                                         | 2.40E-15                                   | Rickard and Pascoe (2009)                           |
| G47417  | TrGAroC  | BENZAL + OH $\rightarrow$ C6H5CO3                                                                                                                                                                                                                                         | 5.9E-12*EXP(225/TEMP)                      | Rickard and Pascoe (2009)                           |
| G47418a | TrGAroC  | CRESO2 + HO <sub>2</sub> $\rightarrow$ CRESOOH                                                                                                                                                                                                                            | KR02H02(7)*(1-rchohch2o2_oh)               | Rickard and Pascoe (2009)                           |
| G47418b | TrGAroC  | CRESO2 + HO <sub>2</sub> $\rightarrow$ .68 C5CO14OH + .68 GLYOX + HO <sub>2</sub> + .32 PTLQONE + OH                                                                                                                                                                      | KR02H02(7)*rchohch2o2_oh                   | Rickard and Pascoe (2009)*                          |
| G47419  | TrGAroCN | CRESO2 + NO $\rightarrow$ .68 C5CO14OH + .68 GLYOX + HO <sub>2</sub> + .32 PTLQONE + NO <sub>2</sub>                                                                                                                                                                      | KR02N0                                     | Rickard and Pascoe (2009)*                          |
| G47420  | TrGAroCN | CRESO2 + NO <sub>3</sub> $\rightarrow$ .68 C5CO14OH + .68 GLYOX + HO <sub>2</sub> + .32 PTLQONE + NO <sub>2</sub>                                                                                                                                                         | KR02N03                                    | Rickard and Pascoe (2009)*                          |

Table 1: Gas phase reactions (... continued)

| #       | labels   | reaction                                                                                                                | rate coefficient                           | reference                                       |
|---------|----------|-------------------------------------------------------------------------------------------------------------------------|--------------------------------------------|-------------------------------------------------|
| G47421  | TrGAroC  | CRESO2 $\rightarrow$ .68 C5CO14OH + .68 GLYOX + HO <sub>2</sub> + .32 PTLQONE                                           | k1_R02ISOPD02                              | Rickard and Pascoe (2009)*                      |
| G47422a | TrGAroCN | NCRESO2 + HO <sub>2</sub> $\rightarrow$ NCRESOOH                                                                        | KR02H02(7)*(1-rchohch2o2_oh)               | Rickard and Pascoe (2009)                       |
| G47422b | TrGAroCN | NCRESO2 + HO <sub>2</sub> $\rightarrow$ C5CO14OH + GLYOX + NO <sub>2</sub> + OH                                         | KR02H02(7)*rchohch2o2_oh                   | Rickard and Pascoe (2009)*                      |
| G47423  | TrGAroCN | NCRESO2 + NO $\rightarrow$ C5CO14OH + GLYOX + NO <sub>2</sub> + NO <sub>2</sub>                                         | KR02N0                                     | Rickard and Pascoe (2009)*                      |
| G47424  | TrGAroCN | NCRESO2 + NO <sub>3</sub> $\rightarrow$ C5CO14OH + GLYOX + NO <sub>2</sub> + NO <sub>2</sub>                            | KR02N03                                    | Rickard and Pascoe (2009)*                      |
| G47425  | TrGAroCN | NCRESO2 $\rightarrow$ C5CO14OH + GLYOX + NO <sub>2</sub>                                                                | k1_R02ISOPD02                              | Rickard and Pascoe (2009)*                      |
| G47426  | TrGAroCN | TOL1O + NO <sub>2</sub> $\rightarrow$ TOL1OHNO2                                                                         | k_C6H50_N02                                | Rickard and Pascoe (2009), Platz et al. (1998)* |
| G47427  | TrGAroC  | TOL1O + O <sub>3</sub> $\rightarrow$ OXYL1O2                                                                            | k_C6H50_O3                                 | Rickard and Pascoe (2009), Tao and Li (1999)    |
| G47428  | TrGAroCN | MCATECHOL + NO <sub>3</sub> $\rightarrow$ MCATEC1O + HNO <sub>3</sub>                                                   | 1.7E-10*1.0                                | Rickard and Pascoe (2009)                       |
| G47429  | TrGAroC  | MCATECHOL + O <sub>3</sub> $\rightarrow$ MC3ODBCO2H + HCOCO <sub>2</sub> H + HO <sub>2</sub> + OH                       | 2.8E-17                                    | Rickard and Pascoe (2009)*                      |
| G47430  | TrGAroC  | MCATECHOL + OH $\rightarrow$ MCATEC1O                                                                                   | 2.0E-10*1.0                                | Rickard and Pascoe (2009)                       |
| G47431  | TrGAroC  | TLBIPEROOH + OH $\rightarrow$ TLOBIPEROH + OH                                                                           | 9.64E-11                                   | Rickard and Pascoe (2009)                       |
| G47432  | TrGAroCN | TLBIPERNO3 + OH $\rightarrow$ TLOBIPEROH + NO <sub>2</sub>                                                              | 7.16E-11                                   | Rickard and Pascoe (2009)                       |
| G47433  | TrGAroC  | TLOBIPEROH + OH $\rightarrow$ C5CO14O2 + GLYOX                                                                          | 7.99E-11                                   | Rickard and Pascoe (2009)                       |
| G47434a | TrGAroC  | TLEMUCCO3 + HO <sub>2</sub> $\rightarrow$ C615CO2O2 + CO <sub>2</sub> + OH                                              | KAPH02*rco3_oh                             | Rickard and Pascoe (2009)                       |
| G47434b | TrGAroC  | TLEMUCCO3 + HO <sub>2</sub> $\rightarrow$ TLEMUCCO2H + O <sub>3</sub>                                                   | KAPH02*rco3_o3                             | Rickard and Pascoe (2009)                       |
| G47434c | TrGAroC  | TLEMUCCO3 + HO <sub>2</sub> $\rightarrow$ TLEMUCCO3H                                                                    | KAPH02*rco3_ooh                            | Rickard and Pascoe (2009)                       |
| G47435  | TrGAroCN | TLEMUCCO3 + NO $\rightarrow$ C615CO2O2 + CO <sub>2</sub> + NO <sub>2</sub>                                              | KAPNO                                      | Rickard and Pascoe (2009)                       |
| G47436  | TrGAroCN | TLEMUCCO3 + NO <sub>2</sub> $\rightarrow$ TLEMUCPAN                                                                     | k_CH3C03_N02                               | Rickard and Pascoe (2009)*                      |
| G47437  | TrGAroCN | TLEMUCCO3 + NO <sub>3</sub> $\rightarrow$ C615CO2O2 + CO <sub>2</sub> + NO <sub>2</sub>                                 | KR02N03*1.74                               | Rickard and Pascoe (2009)                       |
| G47438  | TrGAroC  | TLEMUCCO3 $\rightarrow$ C615CO2O2 + CO <sub>2</sub>                                                                     | k1_R02RC03                                 | Rickard and Pascoe (2009)*                      |
| G47439a | TrGAroC  | TLEMUCO2 + HO <sub>2</sub> $\rightarrow$ TLEMUCOOH                                                                      | KR02H02(7)*(1-rchohch2o2_oh-rcoch2o2_oh)   | Rickard and Pascoe (2009)                       |
| G47439b | TrGAroC  | TLEMUCO2 + HO <sub>2</sub> $\rightarrow$ .5 C3DIALO2 + .5 CO2H3CHO + .5 EPXC4DIAL + .5 MGLYOX + .5 HO <sub>2</sub> + OH | KR02H02(7)*(rchohch2o2_oh+rcoch2o2_oh)     | Rickard and Pascoe (2009)*                      |
| G47440a | TrGAroCN | TLEMUCO2 + NO $\rightarrow$ TLEMUCNO3                                                                                   | KR02N0*alpha_AN(11,2,1,0,0,temp,cair)      | Rickard and Pascoe (2009)                       |
| G47440b | TrGAroCN | TLEMUCO2 + NO $\rightarrow$ .5 C3DIALO2 + .5 CO2H3CHO + .5 EPXC4DIAL + .5 MGLYOX + .5 HO <sub>2</sub> + NO <sub>2</sub> | KR02N0*(1.-alpha_AN(11,2,1,0,0,temp,cair)) | Rickard and Pascoe (2009)*                      |

Table 1: Gas phase reactions (... continued)

| #       | labels   | reaction                                                                                                                    | rate coefficient            | reference                                         |
|---------|----------|-----------------------------------------------------------------------------------------------------------------------------|-----------------------------|---------------------------------------------------|
| G47441  | TrGAroCN | TLEMUCO2 + NO <sub>3</sub> → .5 C3DIALO2 + .5 CO2H3CHO +<br>.5 EPXC4DIAL + .5 MGLYOX + .5 HO <sub>2</sub> + NO <sub>2</sub> | KR02N03                     | Rickard and Pascoe (2009)*                        |
| G47442  | TrGAroC  | TLEMUCO2 → .5 C3DIALO2 + .5 CO2H3CHO + .5<br>EPXC4DIAL + .5 MGLYOX + .5 HO <sub>2</sub>                                     | k1_R02s0R02                 | Rickard and Pascoe (2009)*                        |
| G47443a | TrGAroC  | C6H5CO3 + HO <sub>2</sub> → C6H5CO3H                                                                                        | 1.1E-11*EXP(364./temp)*0.65 | Roth et al. (2010)                                |
| G47443b | TrGAroC  | C6H5CO3 + HO <sub>2</sub> → C6H5O2 + CO <sub>2</sub> + OH                                                                   | 1.1E-11*EXP(364./temp)*0.20 | Roth et al. (2010)                                |
| G47443c | TrGAroC  | C6H5CO3 + HO <sub>2</sub> → PHCOOH + O <sub>3</sub>                                                                         | 1.1E-11*EXP(364./temp)*0.15 | Roth et al. (2010)                                |
| G47444  | TrGAroCN | C6H5CO3 + NO → C6H5O2 + CO <sub>2</sub> + NO <sub>2</sub>                                                                   | KAPN0                       | Rickard and Pascoe (2009)                         |
| G47445  | TrGAroCN | C6H5CO3 + NO <sub>2</sub> → PBZN                                                                                            | k_CH3C03_N02                | Rickard and Pascoe (2009)*                        |
| G47446  | TrGAroCN | C6H5CO3 + NO <sub>3</sub> → C6H5O2 + CO <sub>2</sub> + NO <sub>2</sub>                                                      | KR02N03*1.74                | Rickard and Pascoe (2009)                         |
| G47447  | TrGAroC  | C6H5CO3 → C6H5O2 + CO <sub>2</sub>                                                                                          | k1_R02RC03                  | Rickard and Pascoe (2009)*                        |
| G47448  | TrGAroC  | CRESOOH + OH → CRESO2                                                                                                       | 1.15E-10                    | Rickard and Pascoe (2009)                         |
| G47449  | TrGAroCN | NCRESOOH + OH → NCRESO2                                                                                                     | 1.07E-10                    | Rickard and Pascoe (2009)                         |
| G47450  | TrGAroCN | TOL1OHNO2 + NO <sub>3</sub> → NCRES1O + HNO <sub>3</sub>                                                                    | 3.13E-13*1.0                | Rickard and Pascoe (2009)                         |
| G47451  | TrGAroCN | TOL1OHNO2 + OH → NCRES1O                                                                                                    | 2.8E-12                     | Rickard and Pascoe (2009)                         |
| G47452  | TrGAroC  | OXYL1O2 + HO <sub>2</sub> → OXYL1OOH                                                                                        | KR02H02(7)                  | Rickard and Pascoe (2009)                         |
| G47453  | TrGAroCN | OXYL1O2 + NO → TOL1O + NO <sub>2</sub>                                                                                      | KR02N0                      | Rickard and Pascoe (2009)                         |
| G47454  | TrGAroCN | OXYL1O2 + NO <sub>2</sub> → TOL1O + NO <sub>3</sub>                                                                         | K_C6H5O2_N02                | Jagiella and Zabel (2007)*                        |
| G47455  | TrGAroCN | OXYL1O2 + NO <sub>3</sub> → TOL1O + NO <sub>2</sub>                                                                         | KR02N03                     | Rickard and Pascoe (2009)                         |
| G47456  | TrGAroC  | OXYL1O2 → TOL1O                                                                                                             | k1_R02sR02                  | Rickard and Pascoe (2009)                         |
| G47457  | TrGAroCN | MCATEC1O + NO <sub>2</sub> → MNCATECH                                                                                       | k_C6H50_N02                 | Rickard and Pascoe (2009), Platz<br>et al. (1998) |
| G47458  | TrGAroC  | MCATEC1O + O <sub>3</sub> → MCATEC1O2                                                                                       | k_C6H50_03                  | Rickard and Pascoe (2009), Tao<br>and Li (1999)   |
| G47459  | TrGAroC  | TLEMUCCO2H + OH → C615CO2O2 + CO <sub>2</sub>                                                                               | 5.98E-11                    | Rickard and Pascoe (2009)                         |
| G47460  | TrGAroC  | TLEMUCCO3H + OH → TLEMUCCO3                                                                                                 | 6.29E-11                    | Rickard and Pascoe (2009)                         |
| G47461  | TrGAroCN | TLEMUCPAN + OH → C5DICARB + CO + CO <sub>2</sub> + NO <sub>2</sub>                                                          | 5.96E-11                    | Rickard and Pascoe (2009)                         |
| G47462  | TrGAroCN | TLEMUCPAN → TLEMUCCO3 + NO <sub>2</sub>                                                                                     | k_PAN_M                     | Rickard and Pascoe (2009)                         |
| G47463  | TrGAroC  | TLEMUCOOH + OH → TLEMUCCO + OH                                                                                              | 7.04E-11                    | Rickard and Pascoe (2009)                         |
| G47464  | TrGAroCN | TLEMUCNO3 + OH → TLEMUCCO + NO <sub>2</sub>                                                                                 | 3.06E-11                    | Rickard and Pascoe (2009)                         |
| G47465  | TrGAroC  | TLEMUCCO + OH → CH <sub>3</sub> C(O) + EPXC4DIAL + CO                                                                       | 4.06E-11                    | Rickard and Pascoe (2009)                         |
| G47466  | TrGAroC  | C6H5CO3H + OH → C6H5CO3                                                                                                     | 4.66E-12                    | Rickard and Pascoe (2009)                         |
| G47467  | TrGAroC  | PHCOOH + OH → C6H5O2 + CO <sub>2</sub>                                                                                      | 1.10E-12                    | Rickard and Pascoe (2009)                         |
| G47468  | TrGAroCN | PBZN + OH → C6H5OOH + CO + NO <sub>2</sub>                                                                                  | 1.06E-12                    | Rickard and Pascoe (2009)                         |
| G47469  | TrGAroCN | PBZN → C6H5CO3 + NO <sub>2</sub>                                                                                            | k_PAN_M*0.67                | Rickard and Pascoe (2009)                         |

Table 1: Gas phase reactions (... continued)

| #       | labels   | reaction                                                                | rate coefficient                         | reference                                      |
|---------|----------|-------------------------------------------------------------------------|------------------------------------------|------------------------------------------------|
| G47470  | TrGAroCN | PTLQONE + NO <sub>3</sub> → NPTLQO2                                     | 1.00E-12                                 | Rickard and Pascoe (2009)                      |
| G47471  | TrGAroC  | PTLQONE + OH → PTLQO2                                                   | 2.3E-11                                  | Rickard and Pascoe (2009)                      |
| G47472  | TrGAroCN | NCRES1O + NO <sub>2</sub> → DNCRES                                      | k_C6H50_N02                              | Rickard and Pascoe (2009), Platz et al. (1998) |
| G47473  | TrGAroCN | NCRES1O + O <sub>3</sub> → NCRES1O2                                     | k_C6H50_O3                               | Rickard and Pascoe (2009), Tao and Li (1999)   |
| G47474  | TrGAroC  | OXYL1OOH + OH → OXYL1O2                                                 | 4.65E-11                                 | Rickard and Pascoe (2009)                      |
| G47475  | TrGAroCN | MNCATECH + NO <sub>3</sub> → MNNCATECO2                                 | 5.03E-12                                 | Rickard and Pascoe (2009)                      |
| G47476  | TrGAroCN | MNCATECH + OH → MNCATECO2                                               | 6.83E-12                                 | Rickard and Pascoe (2009)                      |
| G47477  | TrGAroC  | MCATEC1O2 + HO <sub>2</sub> → MCATEC1OOH                                | KR02H02(7)                               | Rickard and Pascoe (2009)                      |
| G47478  | TrGAroCN | MCATEC1O2 + NO → MCATEC1O + NO <sub>2</sub>                             | KR02N0                                   | Rickard and Pascoe (2009)                      |
| G47479  | TrGAroCN | MCATEC1O2 + NO <sub>2</sub> → MCATEC1O + NO <sub>3</sub>                | K_C6H502_N02                             | Jagiella and Zabel (2007)*                     |
| G47480  | TrGAroCN | MCATEC1O2 + NO <sub>3</sub> → MCATEC1O + NO <sub>2</sub>                | KR02N03                                  | Rickard and Pascoe (2009)                      |
| G47481  | TrGAroC  | MCATEC1O2 → MCATEC1O                                                    | k1_R02s0R02                              | Rickard and Pascoe (2009)                      |
| G47482a | TrGAroCN | NPTLQO2 + HO <sub>2</sub> → NPTLQOOH                                    | KR02H02(7)*(1-rcoch2o2_oh)               | Rickard and Pascoe (2009)                      |
| G47482b | TrGAroCN | NPTLQO2 + HO <sub>2</sub> → C7CO4DB + NO <sub>2</sub> + OH              | KR02H02(7)*rcoch2o2_oh                   | Rickard and Pascoe (2009)*                     |
| G47483  | TrGAroCN | NPTLQO2 + NO → C7CO4DB + NO <sub>2</sub> + NO <sub>2</sub>              | KR02N0                                   | Rickard and Pascoe (2009)*                     |
| G47484  | TrGAroCN | NPTLQO2 + NO <sub>3</sub> → C7CO4DB + NO <sub>2</sub> + NO <sub>2</sub> | KR02N03                                  | Rickard and Pascoe (2009)*                     |
| G47485  | TrGAroCN | NPTLQO2 → C7CO4DB + NO <sub>2</sub>                                     | k1_R02s0R02                              | Rickard and Pascoe (2009)*                     |
| G47486a | TrGAroC  | PTLQO2 + HO <sub>2</sub> → PTLQOOH                                      | KR02H02(7)*(1-rchohch2o2_oh-rcoch2o2_oh) | Rickard and Pascoe (2009)                      |
| G47486b | TrGAroC  | PTLQO2 + HO <sub>2</sub> → C6CO2OHCO3 + OH                              | KR02H02(7)*(rchohch2o2_oh+rcoch2o2_oh)   | Rickard and Pascoe (2009)*                     |
| G47487  | TrGAroCN | PTLQO2 + NO → C6CO2OHCO3 + NO <sub>2</sub>                              | KR02N0                                   | Rickard and Pascoe (2009)*                     |
| G47488  | TrGAroCN | PTLQO2 + NO <sub>3</sub> → C6CO2OHCO3 + NO <sub>2</sub>                 | KR02N03                                  | Rickard and Pascoe (2009)*                     |
| G47489  | TrGAroC  | PTLQO2 → C6CO2OHCO3                                                     | k1_R02s0R02                              | Rickard and Pascoe (2009)*                     |
| G47490  | TrGAroCN | DNCRES + NO <sub>3</sub> → NDNCRESO2                                    | 7.83E-15                                 | Rickard and Pascoe (2009)                      |
| G47491  | TrGAroCN | DNCRES + OH → DNCRESO2                                                  | 5.10E-14                                 | Rickard and Pascoe (2009)                      |
| G47492  | TrGAroCN | NCRES1O2 + HO <sub>2</sub> → NCRES1OOH                                  | KR02H02(7)                               | Rickard and Pascoe (2009)                      |
| G47493  | TrGAroCN | NCRES1O2 + NO → NCRES1O + NO <sub>2</sub>                               | KR02N0                                   | Rickard and Pascoe (2009)                      |
| G47494  | TrGAroCN | NCRES1O2 + NO <sub>2</sub> → NCRES1O + NO <sub>3</sub>                  | K_C6H502_N02                             | Jagiella and Zabel (2007)*                     |
| G47495  | TrGAroCN | NCRES1O2 + NO <sub>3</sub> → NCRES1O + NO <sub>2</sub>                  | KR02N03                                  | Rickard and Pascoe (2009)                      |
| G47496  | TrGAroCN | NCRES1O2 → NCRES1O                                                      | k1_R02sR02                               | Rickard and Pascoe (2009)                      |
| G47497a | TrGAroCN | MNNCATECO2 + HO <sub>2</sub> → MNNCATCOOH                               | KR02H02(7)*(1-rchohch2o2_oh)             | Rickard and Pascoe (2009)                      |

Table 1: Gas phase reactions (... continued)

| #       | labels   | reaction                                                                                                                                     | rate coefficient             | reference                  |
|---------|----------|----------------------------------------------------------------------------------------------------------------------------------------------|------------------------------|----------------------------|
| G47497b | TrGAroCN | MNNCATECO <sub>2</sub> + HO <sub>2</sub> → NC <sub>4</sub> MDCO <sub>2</sub> HN + HCOCO <sub>2</sub> H + NO <sub>2</sub> + OH                | KR02H02(7)*rchohch2o2_oh     | Rickard and Pascoe (2009)* |
| G47498  | TrGAroCN | MNNCATECO <sub>2</sub> + NO → NC <sub>4</sub> MDCO <sub>2</sub> HN + HCOCO <sub>2</sub> H + NO <sub>2</sub> + NO <sub>2</sub>                | KR02N0                       | Rickard and Pascoe (2009)* |
| G47499  | TrGAroCN | MNNCATECO <sub>2</sub> + NO <sub>3</sub> → NC <sub>4</sub> MDCO <sub>2</sub> HN + HCOCO <sub>2</sub> H + NO <sub>2</sub> + NO <sub>2</sub>   | KR02N03                      | Rickard and Pascoe (2009)* |
| G47500  | TrGAroCN | MNNCATECO <sub>2</sub> → NC <sub>4</sub> MDCO <sub>2</sub> HN + HCOCO <sub>2</sub> H + NO <sub>2</sub>                                       | k1_R02ISOPD02                | Rickard and Pascoe (2009)  |
| G47501a | TrGAroCN | MNCATECO <sub>2</sub> + HO <sub>2</sub> → MNCATECOOH                                                                                         | KR02H02(7)*(1-rchohch2o2_oh) | Rickard and Pascoe (2009)  |
| G47501b | TrGAroCN | MNCATECO <sub>2</sub> + HO <sub>2</sub> → NC <sub>4</sub> MDCO <sub>2</sub> HN + HCOCO <sub>2</sub> H + HO <sub>2</sub> + OH                 | KR02H02(7)*rchohch2o2_oh     | Rickard and Pascoe (2009)* |
| G47502  | TrGAroCN | MNCATECO <sub>2</sub> + NO → NC <sub>4</sub> MDCO <sub>2</sub> HN + HCOCO <sub>2</sub> H + HO <sub>2</sub> + NO <sub>2</sub>                 | KR02N0                       | Rickard and Pascoe (2009)* |
| G47503  | TrGAroCN | MNCATECO <sub>2</sub> + NO <sub>3</sub> → NC <sub>4</sub> MDCO <sub>2</sub> HN + HCOCO <sub>2</sub> H + HO <sub>2</sub> + NO <sub>2</sub>    | KR02N03                      | Rickard and Pascoe (2009)* |
| G47504  | TrGAroCN | MNCATECO <sub>2</sub> → NC <sub>4</sub> MDCO <sub>2</sub> HN + HCOCO <sub>2</sub> H + HO <sub>2</sub>                                        | k1_R02ISOPD02                | Rickard and Pascoe (2009)* |
| G47505  | TrGAroC  | MCATEC1OOH + OH → MCATEC1O2                                                                                                                  | 2.05E-10                     | Rickard and Pascoe (2009)  |
| G47506  | TrGAroCN | NPTLQOOH + OH → NPTLQO2                                                                                                                      | 8.56E-11                     | Rickard and Pascoe (2009)  |
| G47507  | TrGAroC  | PTLQOOH + OH → PTLQCO + OH                                                                                                                   | 1.42E-10                     | Rickard and Pascoe (2009)  |
| G47508  | TrGAroC  | PTLQCO + OH → C6CO2OHCO3                                                                                                                     | 7.95E-11                     | Rickard and Pascoe (2009)  |
| G47509a | TrGAroCN | NDNCRESO <sub>2</sub> + HO <sub>2</sub> → NDNCRESOOH                                                                                         | KR02H02(7)*(1-rchohch2o2_oh) | Rickard and Pascoe (2009)  |
| G47509b | TrGAroCN | NDNCRESO <sub>2</sub> + HO <sub>2</sub> → NC <sub>4</sub> MDCO <sub>2</sub> HN + HNO <sub>3</sub> + 2 CO + NO <sub>2</sub> + OH              | KR02H02(7)*rchohch2o2_oh     | Rickard and Pascoe (2009)* |
| G47510  | TrGAroCN | NDNCRESO <sub>2</sub> + NO → NC <sub>4</sub> MDCO <sub>2</sub> HN + HNO <sub>3</sub> + 2 CO + NO <sub>2</sub> + NO <sub>2</sub>              | KR02N0                       | Rickard and Pascoe (2009)* |
| G47511  | TrGAroCN | NDNCRESO <sub>2</sub> + NO <sub>3</sub> → NC <sub>4</sub> MDCO <sub>2</sub> HN + HNO <sub>3</sub> + 2 CO + NO <sub>2</sub> + NO <sub>2</sub> | KR02N03                      | Rickard and Pascoe (2009)* |
| G47512  | TrGAroCN | NDNCRESO <sub>2</sub> → NC <sub>4</sub> MDCO <sub>2</sub> HN + HNO <sub>3</sub> + 2 CO + NO <sub>2</sub>                                     | k1_R02ISOPD02                | Rickard and Pascoe (2009)* |
| G47513a | TrGAroCN | DNCRESO <sub>2</sub> + HO <sub>2</sub> → DNCRESOOH                                                                                           | KR02H02(7)*(1-rchohch2o2_oh) | Rickard and Pascoe (2009)  |
| G47513b | TrGAroCN | DNCRESO <sub>2</sub> + HO <sub>2</sub> → NC <sub>4</sub> MDCO <sub>2</sub> HN + HCOCO <sub>2</sub> H + NO <sub>2</sub> + OH                  | KR02H02(7)*rchohch2o2_oh     | Rickard and Pascoe (2009)* |
| G47514  | TrGAroCN | DNCRESO <sub>2</sub> + NO → NC <sub>4</sub> MDCO <sub>2</sub> HN + HCOCO <sub>2</sub> H + NO <sub>2</sub> + NO <sub>2</sub>                  | KR02N0                       | Rickard and Pascoe (2009)* |
| G47515  | TrGAroCN | DNCRESO <sub>2</sub> + NO <sub>3</sub> → NC <sub>4</sub> MDCO <sub>2</sub> HN + HCOCO <sub>2</sub> H + NO <sub>2</sub> + NO <sub>2</sub>     | KR02N03                      | Rickard and Pascoe (2009)* |
| G47516  | TrGAroCN | DNCRESO <sub>2</sub> → NC <sub>4</sub> MDCO <sub>2</sub> HN + HCOCO <sub>2</sub> H + NO <sub>2</sub>                                         | k1_R02ISOPD02                | Rickard and Pascoe (2009)* |

Table 1: Gas phase reactions (... continued)

| #       | labels   | reaction                                                                                                         | rate coefficient          | reference                  |
|---------|----------|------------------------------------------------------------------------------------------------------------------|---------------------------|----------------------------|
| G47517  | TrGAroCN | NCRES1OOH + OH $\rightarrow$ NCRES1O2                                                                            | 1.53E-12                  | Rickard and Pascoe (2009)  |
| G47518  | TrGAroCN | MNNCATCOOH + OH $\rightarrow$ MNNCATECO2                                                                         | 0.6*k_CH300H_OH           | Rickard and Pascoe (2009)  |
| G47519  | TrGAroCN | MNCATECOOH + OH $\rightarrow$ MNCATECO2                                                                          | 0.6*k_CH300H_OH           | Rickard and Pascoe (2009)  |
| G47520  | TrGAroC  | C7CO4DB + OH $\rightarrow$ CO + CO + CH <sub>3</sub> C(O) + HCOCOCHO                                             | 9.58E-11                  | Rickard and Pascoe (2009)  |
| G47521a | TrGAroC  | C6CO2OHCO3 + HO <sub>2</sub> $\rightarrow$ C5134CO2OH + HO <sub>2</sub> + CO + CO <sub>2</sub> + OH              | KAPH02*rco3_oh            | Rickard and Pascoe (2009)  |
| G47521b | TrGAroC  | C6CO2OHCO3 + HO <sub>2</sub> $\rightarrow$ C6COOHCO3H                                                            | KAPH02*(rco3_ooh+rco3_o3) | Rickard and Pascoe (2009)  |
| G47522  | TrGAroCN | C6CO2OHCO3 + NO $\rightarrow$ C5134CO2OH + HO <sub>2</sub> + CO + CO <sub>2</sub> + NO <sub>2</sub>              | KAPNO                     | Rickard and Pascoe (2009)  |
| G47523  | TrGAroCN | C6CO2OHCO3 + NO <sub>2</sub> $\rightarrow$ C6CO2OHPAN                                                            | k_CH3C03_N02              | Rickard and Pascoe (2009)  |
| G47524  | TrGAroCN | C6CO2OHCO3 + NO <sub>3</sub> $\rightarrow$ C5134CO2OH + HO <sub>2</sub> + CO + CO <sub>2</sub> + NO <sub>2</sub> | KR02N03*1.74              | Rickard and Pascoe (2009)  |
| G47525  | TrGAroC  | C6CO2OHCO3 $\rightarrow$ C5134CO2OH + HO <sub>2</sub> + CO + CO <sub>2</sub>                                     | k1_R02RC03                | Rickard and Pascoe (2009)  |
| G47526  | TrGAroCN | NDNCRESOOH + OH $\rightarrow$ NDNCRESO2                                                                          | 0.6*k_CH300H_OH           | Rickard and Pascoe (2009)  |
| G47527  | TrGAroCN | DNCRESOOH + OH $\rightarrow$ DNCRESO2                                                                            | 0.6*k_CH300H_OH           | Rickard and Pascoe (2009)  |
| G47528  | TrGAroC  | C6COOHCO3H + OH $\rightarrow$ C6CO2OHCO3                                                                         | 9.29E-11                  | Rickard and Pascoe (2009)  |
| G47529  | TrGAroCN | C6CO2OHPAN + OH $\rightarrow$ C5134CO2OH + CO + CO + NO <sub>2</sub>                                             | 8.96E-11                  | Rickard and Pascoe (2009)  |
| G47530  | TrGAroCN | C6CO2OHPAN $\rightarrow$ C6CO2OHCO3 + NO <sub>2</sub>                                                            | k_PAN_M                   | Rickard and Pascoe (2009)  |
| G48200  | TrGTerC  | C85O2 $\rightarrow$ C86O2                                                                                        | k1_R02tR02                | Rickard and Pascoe (2009)  |
| G48201  | TrGTerC  | C85O2 + HO <sub>2</sub> $\rightarrow$ C85OOH                                                                     | KR02H02(8)                | Rickard and Pascoe (2009)  |
| G48202  | TrGTerCN | C85O2 + NO $\rightarrow$ C86O2 + NO <sub>2</sub>                                                                 | KR02N0                    | Rickard and Pascoe (2009)* |
| G48203  | TrGTerC  | C85OOH + OH $\rightarrow$ C85O2                                                                                  | 1.29E-11                  | Rickard and Pascoe (2009)  |
| G48204  | TrGTerC  | C86O2 $\rightarrow$ C511O2 + CH <sub>3</sub> COCH <sub>3</sub>                                                   | k1_R02tR02                | Rickard and Pascoe (2009)  |
| G48205  | TrGTerCN | C86O2 + NO $\rightarrow$ C511O2 + CH <sub>3</sub> COCH <sub>3</sub> + NO <sub>2</sub>                            | KR02N0                    | Rickard and Pascoe (2009)* |
| G48206  | TrGTerC  | C86O2 + HO <sub>2</sub> $\rightarrow$ C86OOH                                                                     | KR02H02(8)                | Rickard and Pascoe (2009)  |
| G48207  | TrGTerC  | C86OOH + OH $\rightarrow$ C86O2                                                                                  | 3.45E-11                  | Rickard and Pascoe (2009)  |
| G48208  | TrGTerC  | C811O2 $\rightarrow$ C812O2                                                                                      | k1_R02pR02                | Rickard and Pascoe (2009)  |
| G48209  | TrGTerC  | C811O2 + HO <sub>2</sub> $\rightarrow$ 8 LCARBON                                                                 | KR02H02(8)                | Rickard and Pascoe (2009)  |
| G48210  | TrGTerCN | C811O2 + NO $\rightarrow$ C812O2 + NO <sub>2</sub>                                                               | KR02N0                    | Rickard and Pascoe (2009)* |
| G48211  | TrGTerC  | C812O2 $\rightarrow$ C813O2                                                                                      | k1_R02t0R02               | Rickard and Pascoe (2009)  |
| G48212  | TrGTerCN | C812O2 + NO $\rightarrow$ C813O2 + NO <sub>2</sub>                                                               | KR02N0                    | Rickard and Pascoe (2009)* |
| G48213  | TrGTerC  | C812O2 + HO <sub>2</sub> $\rightarrow$ C812OOH                                                                   | KR02H02(8)                | Rickard and Pascoe (2009)  |
| G48214  | TrGTerC  | C812OOH + OH $\rightarrow$ C812O2                                                                                | 1.09E-11                  | Rickard and Pascoe (2009)  |

Table 1: Gas phase reactions (... continued)

| #       | labels   | reaction                                                                                       | rate coefficient                            | reference                  |
|---------|----------|------------------------------------------------------------------------------------------------|---------------------------------------------|----------------------------|
| G48215  | TrGTerC  | $\text{C813O2} \rightarrow \text{CH}_3\text{COCH}_3 + \text{C512O2}$                           | k1_R02tR02                                  | Rickard and Pascoe (2009)  |
| G48216  | TrGTerCN | $\text{C813O2} + \text{NO} \rightarrow \text{CH}_3\text{COCH}_3 + \text{C512O2} + \text{NO}_2$ | KR02N0                                      | Rickard and Pascoe (2009)* |
| G48217  | TrGTerC  | $\text{C813O2} + \text{HO}_2 \rightarrow \text{C813OOH}$                                       | KR02H02(8)                                  | Rickard and Pascoe (2009)  |
| G48218  | TrGTerC  | $\text{C813OOH} + \text{OH} \rightarrow \text{C813O2}$                                         | 1.86E-11                                    | Rickard and Pascoe (2009)  |
| G48219  | TrGTerCN | $\text{C721CHO} + \text{NO}_3 \rightarrow \text{C721CO3} + \text{HNO}_3$                       | KN03AL*8.5                                  | Rickard and Pascoe (2009)  |
| G48220  | TrGTerC  | $\text{C721CHO} + \text{OH} \rightarrow \text{C721CO3}$                                        | 2.63E-11                                    | Rickard and Pascoe (2009)  |
| G48221a | TrGTerC  | $\text{C721CO3} + \text{HO}_2 \rightarrow \text{C721CO3H}$                                     | KAPH02*rco3_ooh                             | Rickard and Pascoe (2009)  |
| G48221b | TrGTerC  | $\text{C721CO3} + \text{HO}_2 \rightarrow \text{C721O2} + \text{CO}_2 + \text{OH}$             | KAPH02*rco3_oh                              | Rickard and Pascoe (2009)  |
| G48221c | TrGTerC  | $\text{C721CO3} + \text{HO}_2 \rightarrow \text{NORPINIC} + \text{O}_3$                        | KAPH02*rco3_o3                              | Rickard and Pascoe (2009)  |
| G48222  | TrGTerCN | $\text{C721CO3} + \text{NO} \rightarrow \text{C721O2} + \text{CO}_2 + \text{NO}_2$             | KAPN0                                       | Rickard and Pascoe (2009)* |
| G48223  | TrGTerCN | $\text{C721CO3} + \text{NO}_2 \rightarrow \text{C721PAN}$                                      | k_CH3CO3_N02                                | Rickard and Pascoe (2009)  |
| G48224  | TrGTerCN | $\text{C721CO3} + \text{NO}_3 \rightarrow \text{C721O2} + \text{CO}_2 + \text{NO}_2$           | KR02N03*1.74                                | Rickard and Pascoe (2009)  |
| G48225  | TrGTerC  | $\text{C721CO3} \rightarrow \text{C721O2} + \text{CO}_2$                                       | k1_R02RC03*0.9                              | Taraborrelli (2016)        |
| G48226  | TrGTerC  | $\text{C721CO3} \rightarrow \text{NORPINIC}$                                                   | k1_R02RC03*0.1                              | Taraborrelli (2016)        |
| G48227  | TrGTerC  | $\text{C721CO3H} + \text{OH} \rightarrow \text{C721CO3}$                                       | 9.65E-12                                    | Rickard and Pascoe (2009)  |
| G48228  | TrGTerC  | $\text{NORPINIC} + \text{OH} \rightarrow \text{C721O2} + \text{CO}_2$                          | 6.57E-12                                    | Rickard and Pascoe (2009)  |
| G48229  | TrGTerCN | $\text{C721PAN} + \text{OH} \rightarrow \text{C721OOH} + \text{CO} + \text{NO}_2$              | 2.96E-12                                    | Rickard and Pascoe (2009)  |
| G48230  | TrGTerCN | $\text{C721PAN} \rightarrow \text{C721CO3} + \text{NO}_2$                                      | k_PAN_M                                     | Rickard and Pascoe (2009)  |
| G48231  | TrGTerC  | $\text{C8BC} + \text{OH} \rightarrow \text{C8BCO2}$                                            | 3.04E-12                                    | Rickard and Pascoe (2009)  |
| G48232  | TrGTerC  | $\text{C8BCO2} + \text{HO}_2 \rightarrow \text{C8BCOOH}$                                       | KR02H02(8)                                  | Rickard and Pascoe (2009)  |
| G48233a | TrGTerCN | $\text{C8BCO2} + \text{NO} \rightarrow \text{C89O2} + \text{NO}_2$                             | KR02N0*(1.-alpha_AN(8,2,0,0,0, temp, cair)) | Rickard and Pascoe (2009)  |
| G48233b | TrGTerCN | $\text{C8BCO2} + \text{NO} \rightarrow \text{C8BCNO3}$                                         | KR02N0*alpha_AN(8,2,0,0,0,temp, cair)       | Rickard and Pascoe (2009)  |
| G48234  | TrGTerC  | $\text{C8BCO2} \rightarrow \text{C89O2}$                                                       | k1_R02sR02                                  | Rickard and Pascoe (2009)  |
| G48235  | TrGTerC  | $\text{C8BCOOH} + \text{OH} \rightarrow \text{C8BCCO} + \text{OH}$                             | 1.62E-11                                    | Rickard and Pascoe (2009)  |
| G48236  | TrGTerCN | $\text{C8BCNO3} + \text{OH} \rightarrow \text{C8BCCO} + \text{NO}_2$                           | 1.84E-12                                    | Rickard and Pascoe (2009)  |
| G48237  | TrGTerC  | $\text{C8BCCO} + \text{OH} \rightarrow \text{C89O2}$                                           | 3.94E-12                                    | Rickard and Pascoe (2009)  |
| G48238  | TrGTerC  | $\text{C89O2} + \text{HO}_2 \rightarrow \text{C89OOH}$                                         | KR02H02(8)                                  | Rickard and Pascoe (2009)  |
| G48239a | TrGTerCN | $\text{C89O2} + \text{NO} \rightarrow \text{C810O2} + \text{NO}_2$                             | KR02N0*(1.-alpha_AN(7,2,0,0,0, temp, cair)) | Rickard and Pascoe (2009)  |
| G48239b | TrGTerCN | $\text{C89O2} + \text{NO} \rightarrow \text{C89NO3}$                                           | KR02N0*alpha_AN(7,2,0,0,0,temp, cair)       | Rickard and Pascoe (2009)  |
| G48240  | TrGTerCN | $\text{C89O2} + \text{NO}_3 \rightarrow \text{C810O2} + \text{NO}_2$                           | KR02N03                                     | Rickard and Pascoe (2009)  |
| G48241  | TrGTerC  | $\text{C89O2} \rightarrow \text{C810O2}$                                                       | k1_R02tR02                                  | Rickard and Pascoe (2009)  |

Table 1: Gas phase reactions (... continued)

| #       | labels   | reaction                                                                                                                                                                                                                                                                  | rate coefficient                            | reference                  |
|---------|----------|---------------------------------------------------------------------------------------------------------------------------------------------------------------------------------------------------------------------------------------------------------------------------|---------------------------------------------|----------------------------|
| G48242  | TrGTerC  | $\text{C89OOH} + \text{OH} \rightarrow \text{C89O2}$                                                                                                                                                                                                                      | 3.61E-11                                    | Rickard and Pascoe (2009)  |
| G48243  | TrGTerCN | $\text{C89NO3} + \text{OH} \rightarrow \text{CH}_3\text{COCH}_3 + \text{CO13C4CHO} + \text{NO}_2$                                                                                                                                                                         | 2.56E-11                                    | Rickard and Pascoe (2009)  |
| G48244  | TrGTerC  | $\text{C810O2} + \text{HO}_2 \rightarrow \text{C810OOH}$                                                                                                                                                                                                                  | KR02H02(8)                                  | Rickard and Pascoe (2009)  |
| G48245a | TrGTerCN | $\text{C810O2} + \text{NO} \rightarrow \text{CH}_3\text{COCH}_3 + \text{C514O2} + \text{NO}_2$                                                                                                                                                                            | KR02N0*(1-alpha_AN(10,3,0,0,0, temp, cair)) | Rickard and Pascoe (2009)  |
| G48245b | TrGTerCN | $\text{C810O2} + \text{NO} \rightarrow \text{C810NO3}$                                                                                                                                                                                                                    | KR02N0*alpha_AN(10,3,0,0,0, temp, cair)     | Rickard and Pascoe (2009)  |
| G48246  | TrGTerCN | $\text{C810O2} + \text{NO}_3 \rightarrow \text{CH}_3\text{COCH}_3 + \text{C514O2} + \text{NO}_2$                                                                                                                                                                          | KR02N03                                     | Rickard and Pascoe (2009)  |
| G48247  | TrGTerC  | $\text{C810O2} \rightarrow \text{CH}_3\text{COCH}_3 + \text{C514O2}$                                                                                                                                                                                                      | k1_R02tR02                                  | Rickard and Pascoe (2009)  |
| G48248  | TrGTerC  | $\text{C810OOH} + \text{OH} \rightarrow \text{C810O2}$                                                                                                                                                                                                                    | 8.35E-11                                    | Rickard and Pascoe (2009)  |
| G48249  | TrGTerCN | $\text{C810NO3} + \text{OH} \rightarrow \text{CH}_3\text{COCH}_3 + \text{CO13C4CHO} + \text{NO}_2$                                                                                                                                                                        | 4.96E-11                                    | Rickard and Pascoe (2009)  |
| G48400a | TrGAroC  | $\text{LXYL} + \text{OH} \rightarrow \text{TLEPOXMUC} + \text{HO}_2 + \text{LCARBON}$                                                                                                                                                                                     | 0.401E-11                                   | Rickard and Pascoe (2009)* |
| G48400b | TrGAroC  | $\text{LXYL} + \text{OH} \rightarrow \text{C6H5CH2O2} + \text{LCARBON}$                                                                                                                                                                                                   | 0.101E-11                                   | Rickard and Pascoe (2009)* |
| G48400c | TrGAroC  | $\text{LXYL} + \text{OH} \rightarrow \text{CRESOL} + \text{LCARBON}$                                                                                                                                                                                                      | 0.261E-11                                   | Rickard and Pascoe (2009)* |
| G48400d | TrGAroC  | $\text{LXYL} + \text{OH} \rightarrow \text{TLBIPERO2} + \text{HO}_2 + \text{LCARBON}$                                                                                                                                                                                     | 0.932E-11                                   | Rickard and Pascoe (2009)* |
| G48401  | TrGAroCN | $\text{LXYL} + \text{NO}_3 \rightarrow \text{C6H5CH2O2} + \text{HNO}_3 + \text{LCARBON}$                                                                                                                                                                                  | 3.9E-16                                     | Rickard and Pascoe (2009)* |
| G48402  | TrGAroC  | $\text{EBENZ} + \text{OH} \rightarrow .10 \text{ TLEPOXMUC} + .07 \text{ C6H5CH2O2} + .18 \text{ CRESOL} + .65 \text{ TLBIPERO2} + .28 \text{ HO}_2 + \text{LCARBON}$                                                                                                     | 7.00E-12                                    | Rickard and Pascoe (2009)* |
| G48403  | TrGAroCN | $\text{EBENZ} + \text{NO}_3 \rightarrow \text{C6H5CH2O2} + \text{HNO}_3 + \text{LCARBON}$                                                                                                                                                                                 | 1.20E-16                                    | Rickard and Pascoe (2009)* |
| G48404  | TrGAroCN | $\text{STYRENE} + \text{NO}_3 \rightarrow \text{NSTYRENO2}$                                                                                                                                                                                                               | 1.50E-12                                    | Rickard and Pascoe (2009)  |
| G48405  | TrGAroC  | $\text{STYRENE} + \text{O}_3 \rightarrow .545 \text{ HCHO} + .1 \text{ BENZENE} + .28 \text{ C6H5O2} + .56 \text{ CO} + .36 \text{ OH} + .28 \text{ HO}_2 + .075 \text{ PHCOOH} + .545 \text{ BENZAL} + .09 \text{ H}_2\text{O}_2 + .075 \text{ HCOOH} + .2 \text{ CO}_2$ | 1.70E-17                                    | Rickard and Pascoe (2009)* |
| G48406  | TrGAroC  | $\text{STYRENE} + \text{OH} \rightarrow \text{STYRENO2}$                                                                                                                                                                                                                  | 5.80E-11                                    | Rickard and Pascoe (2009)  |
| G48407  | TrGAroCN | $\text{NSTYRENO2} + \text{HO}_2 \rightarrow \text{NSTYRENOOH}$                                                                                                                                                                                                            | KR02H02(8)                                  | Rickard and Pascoe (2009)  |
| G48408  | TrGAroCN | $\text{NSTYRENO2} + \text{NO} \rightarrow \text{NO}_2 + \text{NO}_2 + \text{HCHO} + \text{BENZAL}$                                                                                                                                                                        | KR02N0                                      | Rickard and Pascoe (2009)* |
| G48409  | TrGAroCN | $\text{NSTYRENO2} + \text{NO}_3 \rightarrow \text{NO}_2 + \text{NO}_2 + \text{HCHO} + \text{BENZAL}$                                                                                                                                                                      | KR02N03                                     | Rickard and Pascoe (2009)* |
| G48410  | TrGAroCN | $\text{NSTYRENO2} \rightarrow \text{NO}_2 + \text{HCHO} + \text{BENZAL}$                                                                                                                                                                                                  | k1_R02sR02                                  | Rickard and Pascoe (2009)* |
| G48411  | TrGAroCN | $\text{NSTYRENOOH} + \text{OH} \rightarrow \text{NSTYRENO2}$                                                                                                                                                                                                              | 6.16E-11                                    | Rickard and Pascoe (2009)  |
| G48412a | TrGAroC  | $\text{STYRENO2} + \text{HO}_2 \rightarrow \text{STYRENOOH}$                                                                                                                                                                                                              | KR02H02(8)*(1-rchohch2o2_oh)                | Rickard and Pascoe (2009)  |
| G48412b | TrGAroC  | $\text{STYRENO2} + \text{HO}_2 \rightarrow \text{HO}_2 + \text{OH} + \text{HCHO} + \text{BENZAL}$                                                                                                                                                                         | KR02H02(8)*rchohch2o2_oh                    | Rickard and Pascoe (2009)* |
| G48413  | TrGAroCN | $\text{STYRENO2} + \text{NO} \rightarrow \text{NO}_2 + \text{HO}_2 + \text{HCHO} + \text{BENZAL}$                                                                                                                                                                         | KR02N0                                      | Rickard and Pascoe (2009)* |
| G48414  | TrGAroCN | $\text{STYRENO2} + \text{NO}_3 \rightarrow \text{NO}_2 + \text{HO}_2 + \text{HCHO} + \text{BENZAL}$                                                                                                                                                                       | KR02N03                                     | Rickard and Pascoe (2009)* |
| G48415  | TrGAroC  | $\text{STYRENO2} \rightarrow \text{HO}_2 + \text{HCHO} + \text{BENZAL}$                                                                                                                                                                                                   | k1_R02sR02                                  | Rickard and Pascoe (2009)* |

Table 1: Gas phase reactions (... continued)

| #       | labels   | reaction                                                                              | rate coefficient                               | reference                                         |
|---------|----------|---------------------------------------------------------------------------------------|------------------------------------------------|---------------------------------------------------|
| G48416  | TrGAroC  | STYRENOOH + OH $\rightarrow$ STYRENO2                                                 | 6.16E-11                                       | Rickard and Pascoe (2009)                         |
| G49200  | TrGTerC  | C96O2 $\rightarrow$ C97O2                                                             | k1_R02pR02                                     | Rickard and Pascoe (2009)                         |
| G49201  | TrGTerC  | C96O2 + HO <sub>2</sub> $\rightarrow$ C96OOH                                          | KR02H02(9)                                     | Rickard and Pascoe (2009)                         |
| G49202a | TrGTerCN | C96O2 + NO $\rightarrow$ C97O2 + NO <sub>2</sub>                                      | KR02N0*(1.-alpha_AN(10,1,0,0,0,<br>temp,cair)) | Rickard and Pascoe (2009)                         |
| G49202b | TrGTerCN | C96O2 + NO $\rightarrow$ C96NO3                                                       | KR02N0*alpha_AN(10,1,0,0,0,<br>temp,cair)      | Rickard and Pascoe (2009)                         |
| G49203  | TrGTerCN | C96NO3 + OH $\rightarrow$ NORPINAL + NO <sub>2</sub>                                  | 2.88E-12                                       | Rickard and Pascoe (2009)                         |
| G49204a | TrGTerC  | C96OOH + OH $\rightarrow$ C96O2                                                       | 0.6*k_CH300H_OH                                | Rickard and Pascoe (2009)                         |
| G49205b | TrGTerC  | C96OOH + OH $\rightarrow$ NORPINAL + OH                                               | 1.30E-11                                       | Rickard and Pascoe (2009)                         |
| G49206  | TrGTerC  | C97O2 $\rightarrow$ C98O2                                                             | k1_R02tR02                                     | Rickard and Pascoe (2009)                         |
| G49207  | TrGTerCN | C97O2 + NO $\rightarrow$ C98O2 + NO <sub>2</sub>                                      | KR02N0                                         | Rickard and Pascoe (2009)*                        |
| G49208a | TrGTerC  | C97O2 + HO <sub>2</sub> $\rightarrow$ C97OOH                                          | KR02H02(9)*rcoch2o2_ooh                        | Rickard and Pascoe (2009),<br>Taraborrelli (2016) |
| G49208b | TrGTerC  | C97O2 + HO <sub>2</sub> $\rightarrow$ C98O2 + OH                                      | KR02H02(9)*rcoch2o2_oh                         | Rickard and Pascoe (2009),<br>Taraborrelli (2016) |
| G49209  | TrGTerC  | C97OOH + OH $\rightarrow$ C97O2                                                       | 1.05E-11                                       | Rickard and Pascoe (2009)                         |
| G49210  | TrGTerC  | C98O2 $\rightarrow$ C614O2 + CH <sub>3</sub> COCH <sub>3</sub>                        | k1_R02tR02                                     | Rickard and Pascoe (2009)                         |
| G49211a | TrGTerCN | C98O2 + NO $\rightarrow$ C614O2 + CH <sub>3</sub> COCH <sub>3</sub> + NO <sub>2</sub> | KR02N0*(1.-alpha_AN(12,3,0,0,0,<br>temp,cair)) | Rickard and Pascoe (2009)                         |
| G49211b | TrGTerCN | C98O2 + NO $\rightarrow$ 9 LCARBON + LNITROGEN                                        | KR02N0*alpha_AN(12,3,0,0,0,<br>temp,cair)      | Rickard and Pascoe (2009)                         |
| G49212  | TrGTerC  | C98O2 + HO <sub>2</sub> $\rightarrow$ C98OOH                                          | KR02H02(9)                                     | Rickard and Pascoe (2009)                         |
| G49213  | TrGTerC  | C98OOH + OH $\rightarrow$ C98O2                                                       | 2.05E-11                                       | Rickard and Pascoe (2009)                         |
| G49214  | TrGTerC  | NORPINAL + OH $\rightarrow$ C85CO3                                                    | 2.64E-11                                       | Rickard and Pascoe (2009)                         |
| G49215  | TrGTerCN | NORPINAL + NO <sub>3</sub> $\rightarrow$ C85CO3 + HNO <sub>3</sub>                    | KN03AL*8.5                                     | Rickard and Pascoe (2009)                         |
| G49216  | TrGTerC  | C85CO3 $\rightarrow$ C85O2 + CO <sub>2</sub>                                          | k1_R02RC03                                     | Rickard and Pascoe (2009)                         |
| G49217  | TrGTerCN | C85CO3 + NO $\rightarrow$ C85O2 + CO <sub>2</sub> + NO <sub>2</sub>                   | KAPNO                                          | Rickard and Pascoe (2009)                         |
| G49218  | TrGTerCN | C85CO3 + NO <sub>2</sub> $\rightarrow$ C9PAN2                                         | k_CH3C03_N02                                   | Rickard and Pascoe (2009)                         |
| G49219a | TrGTerC  | C85CO3 + HO <sub>2</sub> $\rightarrow$ C85CO3H                                        | KAPH02*(rco3_ooh+rco3_o3)                      | Rickard and Pascoe (2009)                         |
| G49219b | TrGTerC  | C85CO3 + HO <sub>2</sub> $\rightarrow$ C85O2 + CO <sub>2</sub> + OH                   | KAPH02*rco3_oh                                 | Rickard and Pascoe (2009)                         |
| G49220  | TrGTerCN | C9PAN2 $\rightarrow$ C85CO3 + NO <sub>2</sub>                                         | k_PAN_M                                        | Rickard and Pascoe (2009)                         |
| G49221  | TrGTerCN | C9PAN2 + OH $\rightarrow$ C85OOH + CO + NO <sub>2</sub>                               | 6.60E-12                                       | Rickard and Pascoe (2009)                         |
| G49222  | TrGTerC  | C85CO3H + OH $\rightarrow$ C85CO3                                                     | 1.02E-11                                       | Rickard and Pascoe (2009)                         |
| G49223a | TrGTerC  | C89CO3 $\rightarrow$ .8 C811CO3 + .2 C89O2 + .2 CO <sub>2</sub>                       | k1_R02RC03*0.9                                 | Taraborrelli (2016)                               |

Table 1: Gas phase reactions (... continued)

| #       | labels   | reaction                                                                                                        | rate coefficient                     | reference                                        |
|---------|----------|-----------------------------------------------------------------------------------------------------------------|--------------------------------------|--------------------------------------------------|
| G49223b | TrGTerC  | $\text{C89CO3} \rightarrow \text{C89CO2H}$                                                                      | $k1\_R02RC03*0.1$                    | Taraborrelli (2016)                              |
| G49224a | TrGTerC  | $\text{C89CO3} + \text{HO}_2 \rightarrow \text{C89CO3H}$                                                        | $\text{KAPH02*rc03\_ooh}$            | Rickard and Pascoe (2009)                        |
| G49224b | TrGTerC  | $\text{C89CO3} + \text{HO}_2 \rightarrow \text{C89CO2H} + \text{O}_3$                                           | $\text{KAPH02*rc03\_o3}$             | Rickard and Pascoe (2009)                        |
| G49224c | TrGTerC  | $\text{C89CO3} + \text{HO}_2 \rightarrow .80 \text{ C811CO3} + .20 \text{ C89O2} + .2 \text{ CO}_2 + \text{OH}$ | $\text{KAPH02*rc03\_oh}$             | Rickard and Pascoe (2009)                        |
| G49225  | TrGTerCN | $\text{C89CO3} + \text{NO}_2 \rightarrow \text{C89PAN}$                                                         | $k\_CH3C03\_N02$                     | Rickard and Pascoe (2009)                        |
| G49226  | TrGTerCN | $\text{C89CO3} + \text{NO} \rightarrow .8 \text{ C811CO3} + .2 \text{ C89O2} + .2 \text{ CO}_2 + \text{NO}_2$   | $\text{KAPNO}$                       | Rickard and Pascoe (2009)                        |
| G49227  | TrGTerC  | $\text{C89CO2H} + \text{OH} \rightarrow .8 \text{ C811CO3} + .2 \text{ C89O2} + .2 \text{ CO}_2$                | $2.69\text{E-}11$                    | Rickard and Pascoe (2009)                        |
| G49228  | TrGTerC  | $\text{C89CO3H} + \text{OH} \rightarrow \text{C89CO3}$                                                          | $3.00\text{E-}11$                    | Rickard and Pascoe (2009)                        |
| G49229  | TrGTerCN | $\text{C89PAN} \rightarrow \text{C89CO3} + \text{NO}_2$                                                         | $k\_PAN\_M$                          | Rickard and Pascoe (2009)                        |
| G49230  | TrGTerCN | $\text{C89PAN} + \text{OH} \rightarrow \text{CH}_3\text{COCH}_3 + \text{CO13C4CHO} + \text{CO} + \text{NO}_2$   | $2.52\text{E-}11$                    | Rickard and Pascoe (2009)                        |
| G49231a | TrGTerC  | $\text{C811CO3} \rightarrow \text{C811O2} + \text{CO}_2$                                                        | $k1\_R02RC03*0.9$                    | Taraborrelli (2016)                              |
| G49231b | TrGTerC  | $\text{C811CO3} \rightarrow \text{PINIC}$                                                                       | $k1\_R02RC03*0.1$                    | Taraborrelli (2016)                              |
| G49232a | TrGTerC  | $\text{C811CO3} + \text{HO}_2 \rightarrow \text{C811CO3H}$                                                      | $\text{KAPH02*rc03\_ooh}$            | Rickard and Pascoe (2009)                        |
| G49232b | TrGTerC  | $\text{C811CO3} + \text{HO}_2 \rightarrow \text{PINIC} + \text{O}_3$                                            | $\text{KAPH02*rc03\_o3}$             | Rickard and Pascoe (2009)                        |
| G49232c | TrGTerC  | $\text{C811CO3} + \text{HO}_2 \rightarrow \text{C811O2} + \text{CO}_2 + \text{OH}$                              | $\text{KAPH02*rc03\_oh}$             | Rickard and Pascoe (2009)                        |
| G49233  | TrGTerCN | $\text{C811CO3} + \text{NO} \rightarrow \text{C811O2} + \text{CO}_2 + \text{NO}_2$                              | $\text{KAPNO}$                       | Rickard and Pascoe (2009)                        |
| G49234  | TrGTerCN | $\text{C811CO3} + \text{NO}_2 \rightarrow \text{C811PAN}$                                                       | $k\_CH3C03\_N02$                     | Rickard and Pascoe (2009)                        |
| G49235  | TrGTerC  | $\text{PINIC} + \text{OH} \rightarrow \text{C811O2} + \text{CO}_2$                                              | $7.29\text{E-}12$                    | Rickard and Pascoe (2009)                        |
| G49236  | TrGTerC  | $\text{NOPINONE} + \text{OH} \rightarrow \text{NOPINDO2}$                                                       | $1.55\text{E-}11$                    | Capouet et al. (2008), Rickard and Pascoe (2009) |
| G49237a | TrGTerC  | $\text{NOPINDO2} + \text{HO}_2 \rightarrow \text{NOPINDOOH}$                                                    | $\text{KR02H02(9)*rc0ch2o2\_ooh}$    | Rickard and Pascoe (2009), Taraborrelli (2016)   |
| G49237b | TrGTerC  | $\text{NOPINDO2} + \text{HO}_2 \rightarrow \text{C89CO3} + \text{OH}$                                           | $\text{KR02H02(9)*rc0ch2o2\_oh}$     | Rickard and Pascoe (2009), Taraborrelli (2016)   |
| G49238  | TrGTerCN | $\text{NOPINDO2} + \text{NO} \rightarrow \text{C89CO3} + \text{NO}_2$                                           | $\text{KR02NO}$                      | Rickard and Pascoe (2009)*                       |
| G49239  | TrGTerC  | $\text{NOPINDO2} \rightarrow \text{C89CO3}$                                                                     | $k1\_R02p0R02$                       | Rickard and Pascoe (2009)                        |
| G49240  | TrGTerC  | $\text{NOPINDOOH} \rightarrow \text{NOPINDCO}$                                                                  | $2.63\text{E-}11$                    | Rickard and Pascoe (2009)                        |
| G49241  | TrGTerC  | $\text{NOPINDCO} + \text{OH} \rightarrow \text{C89CO3}$                                                         | $3.07\text{E-}12$                    | Rickard and Pascoe (2009)                        |
| G49242  | TrGTerC  | $\text{NOPINOO} \rightarrow \text{NOPINONE} + \text{H}_2\text{O}_2$                                             | $6.00\text{E-}18*c(\text{ind\_H2O})$ | Rickard and Pascoe (2009)                        |
| G49243  | TrGTerC  | $\text{NOPINOO} + \text{CO} \rightarrow \text{NOPINONE} + \text{CO}_2$                                          | $1.2\text{E-}15$                     | Rickard and Pascoe (2009)                        |
| G49244  | TrGTerCN | $\text{NOPINOO} + \text{NO} \rightarrow \text{NOPINONE} + \text{NO}_2$                                          | $1.\text{E-}14$                      | Rickard and Pascoe (2009)                        |
| G49245  | TrGTerCN | $\text{NOPINOO} + \text{NO}_2 \rightarrow \text{NOPINONE} + \text{NO}_3$                                        | $1.\text{E-}15$                      | Rickard and Pascoe (2009)                        |

Table 1: Gas phase reactions (... continued)

| #       | labels   | reaction                                                                                        | rate coefficient                                                                   | reference                                      |
|---------|----------|-------------------------------------------------------------------------------------------------|------------------------------------------------------------------------------------|------------------------------------------------|
| G49246  | TrGTerC  | NORPINENOL + OH $\rightarrow$ HCOOH + OH + C86O2                                                | k_CH2CHOH_OH_HCOOH                                                                 | Taraborrelli (2016), So et al. (2014)*         |
| G49247  | TrGTerC  | NORPINENOL + HCOOH $\rightarrow$ NORPINAL + HCOOH                                               | k_CH2CHOH_HCOOH                                                                    | Taraborrelli (2016), daSilva (2010)*           |
| G49248  | TrGTerC  | NORPINAL + HCOOH $\rightarrow$ NORPINENOL + HCOOH                                               | k_ALD_HCOOH                                                                        | Taraborrelli (2016), daSilva (2010)*           |
| G49249  | TrGTerC  | C811CO3H + OH $\rightarrow$ C811CO3                                                             | 1.04E-11                                                                           | Rickard and Pascoe (2009)                      |
| G49250  | TrGTerCN | C811PAN $\rightarrow$ C811CO3 + NO <sub>2</sub>                                                 | k_PAN_M                                                                            | Rickard and Pascoe (2009)                      |
| G49251  | TrGTerCN | C811PAN + OH $\rightarrow$ C721CHO + CO + NO <sub>2</sub>                                       | 6.77E-12                                                                           | Rickard and Pascoe (2009)                      |
| G49400a | TrGAroC  | LTMB + OH $\rightarrow$ TLEPOXMUC + HO <sub>2</sub> + 2 LCARBON                                 | 0.827E-11                                                                          | Rickard and Pascoe (2009)*                     |
| G49400b | TrGAroC  | LTMB + OH $\rightarrow$ C6H5CH2O2 + 2 LCARBON                                                   | 0.189E-11                                                                          | Rickard and Pascoe (2009)*                     |
| G49400c | TrGAroC  | LTMB + OH $\rightarrow$ CRESOL + 2 LCARBON                                                      | 0.141E-11                                                                          | Rickard and Pascoe (2009)*                     |
| G49400d | TrGAroC  | LTMB + OH $\rightarrow$ TLBIPERO2 + HO <sub>2</sub> + 2 LCARBON                                 | 2.917E-11                                                                          | Rickard and Pascoe (2009)*                     |
| G49401  | TrGAroCN | LTMB + NO <sub>3</sub> $\rightarrow$ C6H5CH2O2 + HNO <sub>3</sub> + 2 LCARBON                   | 1.52E-15                                                                           | Rickard and Pascoe (2009)*                     |
| G40200  | TrGTerC  | APINENE + OH $\rightarrow$ .75 LAPINABO2 + .15 MENTHEN6ONE + .15 HO <sub>2</sub> + .10 ROO6R1O2 | 1.2E-11*EXP(440./TEMP)                                                             | Atkinson et al. (2006)*                        |
| G40201a | TrGTerCN | LAPINABO2 + NO $\rightarrow$ PINAL + HO <sub>2</sub> + NO <sub>2</sub>                          | KR02N0*(1-(.65*alpha_AN(11,3,0,0,0,temp,cair)+.35*alpha_AN(11,2,0,0,0,temp,cair))) | Rickard and Pascoe (2009), Taraborrelli (2016) |
| G40201b | TrGTerCN | LAPINABO2 + NO $\rightarrow$ LAPINABNO3                                                         | KR02N0*(.65*alpha_AN(11,3,0,0,0,temp,cair)+.35*alpha_AN(11,2,0,0,0,temp,cair))     | Rickard and Pascoe (2009), Taraborrelli (2016) |
| G40202a | TrGTerC  | LAPINABO2 + HO <sub>2</sub> $\rightarrow$ LAPINABOOH                                            | KR02H02(10)*(1-rchohch2o2_oh)                                                      | Rickard and Pascoe (2009), Taraborrelli (2016) |
| G40202b | TrGTerC  | LAPINABO2 + HO <sub>2</sub> $\rightarrow$ PINAL + HO <sub>2</sub> + OH                          | KR02H02(10)*rchohch2o2_oh                                                          | Rickard and Pascoe (2009), Taraborrelli (2016) |
| G40203  | TrGTerC  | LAPINABO2 $\rightarrow$ PINAL + HO <sub>2</sub>                                                 | R02*(0.65*k1_R02tOR02+.35*k1_R02sOR02)                                             | Rickard and Pascoe (2009)*                     |
| G40204  | TrGTerC  | LAPINABOOH + OH $\rightarrow$ .35 LAPINABO2 + .65 C96CO3                                        | 2.77E-11                                                                           | Rickard and Pascoe (2009)*                     |
| G40205  | TrGTerCN | LAPINABNO3 + OH $\rightarrow$ .35 PINAL + .65 C96CO3 + NO <sub>2</sub>                          | 4.29E-12                                                                           | Rickard and Pascoe (2009)*                     |
| G40206  | TrGTerC  | MENTHEN6ONE + OH $\rightarrow$ OHMENTHEN6ONEO2                                                  | 6.46E-11                                                                           | Vereecken et al. (2007)*                       |
| G40207  | TrGTerCN | OHMENTHEN6ONEO2 + NO $\rightarrow$ 2OHMENTHEN6ONE + HO <sub>2</sub> + NO <sub>2</sub>           | KR02N0                                                                             | Vereecken et al. (2007)*                       |
| G40208  | TrGTerC  | OHMENTHEN6ONEO2 + HO <sub>2</sub> $\rightarrow$ 2OHMENTHEN6ONE                                  | KR02H02(10)                                                                        | Vereecken et al. (2007)                        |
| G40209  | TrGTerC  | OHMENTHEN6ONEO2 $\rightarrow$ 2OHMENTHEN6ONE + HO <sub>2</sub>                                  | k1_R02tOR02                                                                        | Vereecken et al. (2007)                        |

Table 1: Gas phase reactions (... continued)

| #       | labels   | reaction                                                                                                                                           | rate coefficient                                   | reference                                      |
|---------|----------|----------------------------------------------------------------------------------------------------------------------------------------------------|----------------------------------------------------|------------------------------------------------|
| G40210  | TrGTerC  | 2OHMENTHEN6ONE + OH $\rightarrow$ 10 LCARBON                                                                                                       | 1E-11                                              | Vereecken et al. (2007)                        |
| G40211  | TrGTerC  | PINAL + OH $\rightarrow$ .772 C96CO3 + .228 PINALO2                                                                                                | 5.2E-12*EXP(600./TEMP)                             | T. J. Wallington et al. (2014)*                |
| G40212  | TrGTerCN | PINAL + NO <sub>3</sub> $\rightarrow$ C96CO3 + HNO <sub>3</sub>                                                                                    | 2.0E-14                                            | T. J. Wallington et al. (2014)*                |
| G40213a | TrGTerC  | C96CO3 $\rightarrow$ C96O2 + CO <sub>2</sub>                                                                                                       | k1_R02RC03*0.9                                     | Rickard and Pascoe (2009)                      |
| G40213b | TrGTerC  | C96CO3 $\rightarrow$ PINONIC                                                                                                                       | k1_R02RC03*0.1                                     | Rickard and Pascoe (2009)                      |
| G40214a | TrGTerC  | C96CO3 + HO <sub>2</sub> $\rightarrow$ PERPINONIC                                                                                                  | KAPH02*rco3_ooh                                    | Rickard and Pascoe (2009)                      |
| G40214b | TrGTerC  | C96CO3 + HO <sub>2</sub> $\rightarrow$ PINONIC + O <sub>3</sub>                                                                                    | KAPH02*rco3_o3                                     | Rickard and Pascoe (2009)                      |
| G40214c | TrGTerC  | C96CO3 + HO <sub>2</sub> $\rightarrow$ C96O2 + OH + CO <sub>2</sub>                                                                                | KAPH02*rco3_oh                                     | Rickard and Pascoe (2009)                      |
| G40215  | TrGTerCN | C96CO3 + NO <sub>2</sub> $\rightarrow$ C10PAN2                                                                                                     | k_CH3C03_NO2                                       | Rickard and Pascoe (2009)                      |
| G40216  | TrGTerCN | C96CO3 + NO $\rightarrow$ C96O2 + NO <sub>2</sub> + CO <sub>2</sub>                                                                                | KAPNO                                              | Rickard and Pascoe (2009)                      |
| G40217  | TrGTerCN | C96CO3 + NO <sub>3</sub> $\rightarrow$ C96O2 + NO <sub>2</sub> + CO <sub>2</sub>                                                                   | KR02N03*1.60                                       | Rickard and Pascoe (2009)                      |
| G40218  | TrGTerCN | C10PAN2 $\rightarrow$ C96CO3 + NO <sub>2</sub>                                                                                                     | k_PAN_M                                            | Rickard and Pascoe (2009)                      |
| G40219  | TrGTerCN | C10PAN2 + OH $\rightarrow$ NORPINAL + CO + NO <sub>2</sub>                                                                                         | 3.66E-12                                           | Rickard and Pascoe (2009)                      |
| G40220  | TrGTerC  | PINONIC + OH $\rightarrow$ C96O2 + CO <sub>2</sub>                                                                                                 | 6.65E-12                                           | Rickard and Pascoe (2009)                      |
| G40221  | TrGTerC  | PERPINONIC + OH $\rightarrow$ C96CO3                                                                                                               | 9.73E-12                                           | Rickard and Pascoe (2009)                      |
| G40222  | TrGTerC  | PINALO2 + HO <sub>2</sub> $\rightarrow$ PINALOOH                                                                                                   | KR02H02(10)                                        | Rickard and Pascoe (2009)                      |
| G40223a | TrGTerCN | PINALO2 + NO $\rightarrow$ C106O2 + NO <sub>2</sub>                                                                                                | KR02N0*(1.-alpha_AN(12,3,0,1,0, temp, cair))       | Rickard and Pascoe (2009), Taraborrelli (2016) |
| G40223b | TrGTerCN | PINALO2 + NO $\rightarrow$ PINALNO3                                                                                                                | KR02N0*alpha_AN(12,3,0,1,0, temp, cair)            | Rickard and Pascoe (2009), Taraborrelli (2016) |
| G40224  | TrGTerC  | PINALO2 $\rightarrow$ C106O2                                                                                                                       | k1_R02tR02                                         | Rickard and Pascoe (2009)                      |
| G40225  | TrGTerC  | PINALOOH + OH $\rightarrow$ PINALO2                                                                                                                | 2.75E-11                                           | Rickard and Pascoe (2009)                      |
| G40226  | TrGTerCN | PINALNO3 + OH $\rightarrow$ CO235C6CHO + CH <sub>3</sub> COCH <sub>3</sub> + NO <sub>2</sub>                                                       | 2.25E-11                                           | Rickard and Pascoe (2009)                      |
| G40227  | TrGTerC  | C106O2 + HO <sub>2</sub> $\rightarrow$ C106OOH                                                                                                     | KR02H02(10)                                        | Rickard and Pascoe (2009)                      |
| G40228a | TrGTerCN | C106O2 + NO $\rightarrow$ C716O2 + CH <sub>3</sub> COCH <sub>3</sub> + NO <sub>2</sub>                                                             | KR02N0*0.875*(1.-alpha_AN(13,3,0,0,0, temp, cair)) | Rickard and Pascoe (2009), Taraborrelli (2016) |
| G40228b | TrGTerCN | C106O2 + NO $\rightarrow$ C106NO3                                                                                                                  | KR02N0*0.875*alpha_AN(13,3,0,0,0, temp, cair)      | Rickard and Pascoe (2009), Taraborrelli (2016) |
| G40229  | TrGTerC  | C106O2 $\rightarrow$ C716O2 + CH <sub>3</sub> COCH <sub>3</sub>                                                                                    | k1_R02tR02                                         | Rickard and Pascoe (2009)                      |
| G40230  | TrGTerC  | C106OOH + OH $\rightarrow$ C106O2                                                                                                                  | 8.01E-11                                           | Rickard and Pascoe (2009)                      |
| G40231  | TrGTerCN | C106NO3 + OH $\rightarrow$ CO235C6CHO + CH <sub>3</sub> COCH <sub>3</sub> + NO <sub>2</sub>                                                        | 7.03E-11                                           | Rickard and Pascoe (2009)                      |
| G40232  | TrGTerC  | APINENE + O <sub>3</sub> $\rightarrow$ .09 APINBOO + .08 PINONIC + .77 OH + .33 NORPINAL + .33 CO + .33 HO <sub>2</sub> + .06 APINAOO + .44 C109O2 | 8.05E-16*EXP(-640./TEMP)                           | T. J. Wallington et al. (2014)*                |

Table 1: Gas phase reactions (... continued)

| #       | labels   | reaction                                                                             | rate coefficient                                              | reference                                         |
|---------|----------|--------------------------------------------------------------------------------------|---------------------------------------------------------------|---------------------------------------------------|
| G40233  | TrGTerC  | APINAOO $\rightarrow$ PINAL + H <sub>2</sub> O <sub>2</sub>                          | 1.00E-17*c(ind_H20)                                           | Rickard and Pascoe (2009)                         |
| G40234  | TrGTerC  | APINAOO + CO $\rightarrow$ PINAL + CO <sub>2</sub>                                   | 1.20E-15                                                      | Rickard and Pascoe (2009)                         |
| G40235  | TrGTerCN | APINAOO + NO $\rightarrow$ PINAL + NO <sub>2</sub>                                   | 1.00E-14                                                      | Rickard and Pascoe (2009)                         |
| G40236  | TrGTerCN | APINAOO + NO <sub>2</sub> $\rightarrow$ PINAL + NO <sub>3</sub>                      | 1.00E-15                                                      | Rickard and Pascoe (2009)                         |
| G40237a | TrGTerC  | APINBOO $\rightarrow$ PINONIC                                                        | 1.00E-17*c(ind_H20)*(0.08+0.15)                               | Rickard and Pascoe (2009)                         |
| G40237b | TrGTerC  | APINBOO $\rightarrow$ PINAL + H <sub>2</sub> O <sub>2</sub>                          | 1.00E-17*c(ind_H20)*0.77                                      | Rickard and Pascoe (2009)                         |
| G40238  | TrGTerC  | APINBOO + CO $\rightarrow$ PINAL + CO <sub>2</sub>                                   | 1.20E-15                                                      | Rickard and Pascoe (2009)                         |
| G40239  | TrGTerCN | APINBOO + NO $\rightarrow$ PINAL + NO <sub>2</sub>                                   | 1.00E-14                                                      | Rickard and Pascoe (2009)                         |
| G40240  | TrGTerCN | APINBOO + NO <sub>2</sub> $\rightarrow$ PINAL + NO <sub>3</sub>                      | 1.00E-15                                                      | Rickard and Pascoe (2009)                         |
| G40241  | TrGTerC  | C109O2 $\rightarrow$ C89CO3 + HCHO                                                   | k1_R02p0R02                                                   | Rickard and Pascoe (2009)                         |
| G40242  | TrGTerCN | C109O2 + NO $\rightarrow$ C89CO3 + HCHO + NO <sub>2</sub>                            | KR02N0                                                        | Rickard and Pascoe (2009)*                        |
| G40243a | TrGTerC  | C109O2 + HO <sub>2</sub> $\rightarrow$ C109OOH                                       | KR02H02(10)*rcoch2o2_ooh                                      | Rickard and Pascoe (2009),<br>Taraborrelli (2016) |
| G40243b | TrGTerC  | C109O2 + HO <sub>2</sub> $\rightarrow$ C89CO3 + HCHO + OH                            | KR02H02(10)*rcoch2o2_oh                                       | Rickard and Pascoe (2009),<br>Taraborrelli (2016) |
| G40244  | TrGTerC  | C109OOH + OH $\rightarrow$ C109CO + OH                                               | 5.47E-11                                                      | Rickard and Pascoe (2009)                         |
| G40245  | TrGTerC  | C109CO + OH $\rightarrow$ C89CO3 + CO                                                | 5.47E-11                                                      | Rickard and Pascoe (2009)                         |
| G40246  | TrGTerCN | APINENE + NO <sub>3</sub> $\rightarrow$ LNAPINABO2                                   | 1.2E-12*EXP(490./temp)                                        | T. J. Wallington et al. (2014)*                   |
| G40247  | TrGTerCN | LNAPINABO2 $\rightarrow$ PINAL + NO <sub>2</sub>                                     | (0.65*k1_R02tR02 + 0.35*k1_R02sR02)                           | Rickard and Pascoe (2009)                         |
| G40248  | TrGTerCN | LNAPINABO2 + NO $\rightarrow$ PINAL + NO <sub>2</sub> + NO <sub>2</sub>              | KR02N0                                                        | Rickard and Pascoe (2009)*                        |
| G40249  | TrGTerCN | LNAPINABO2 + HO <sub>2</sub> $\rightarrow$ LNAPINABOOH                               | KR02H02(10)                                                   | Rickard and Pascoe (2009)                         |
| G40250  | TrGTerCN | LNAPINABO2 + NO <sub>3</sub> $\rightarrow$ PINAL + NO <sub>2</sub> + NO <sub>2</sub> | KR02N03                                                       | Rickard and Pascoe (2009)                         |
| G40251  | TrGTerCN | LNAPINABOOH + OH $\rightarrow$ LNAPINABO2                                            | (.65*6.87E-12+.35*1.23E-11)                                   | Rickard and Pascoe (2009)                         |
| G40252a | TrGTerC  | BPINENE + OH $\rightarrow$ BPINAO2                                                   | 1.47E-11*EXP(467./TEMP)<br>*(0.8326*0.3+0.068)/(0.8326+0.068) | Gill and Hites (2002)*                            |
| G40252b | TrGTerC  | BPINENE + OH $\rightarrow$ ROO6R1O2                                                  | 1.47E-11*EXP(467./TEMP)<br>*0.8326*0.7/(0.8326+0.068)         | Gill and Hites (2002)*                            |
| G40253a | TrGTerC  | BPINAO2 + HO <sub>2</sub> $\rightarrow$ BPINAOOH                                     | KR02H02(10)*rcoch2o2_ooh                                      | Rickard and Pascoe (2009),<br>Taraborrelli (2016) |
| G40253b | TrGTerC  | BPINAO2 + HO <sub>2</sub> $\rightarrow$ NOPINONE + HCHO + HO <sub>2</sub> + OH       | KR02H02(10)*rcoch2o2_oh                                       | Rickard and Pascoe (2009),<br>Taraborrelli (2016) |
| G40254a | TrGTerCN | BPINAO2 + NO $\rightarrow$ NOPINONE + HCHO + HO <sub>2</sub> + NO <sub>2</sub>       | KR02N0*(1.-alpha_AN(11,3,0,0,0,<br>temp, cair))               | Rickard and Pascoe (2009),<br>Taraborrelli (2016) |

Table 1: Gas phase reactions (... continued)

| #       | labels   | reaction                                                                                             | rate coefficient                                 | reference                                            |
|---------|----------|------------------------------------------------------------------------------------------------------|--------------------------------------------------|------------------------------------------------------|
| G40254b | TrGTerCN | BPINAO2 + NO → BPINANO3                                                                              | KR02N0*alpha_AN(11,3,0,0,0, temp, cair)          | Rickard and Pascoe (2009), Taraborrelli (2016)       |
| G40255  | TrGTerC  | BPINAO2 → NOPINONE + HCHO + HO <sub>2</sub>                                                          | k1_R02t0R02                                      | Rickard and Pascoe (2009)                            |
| G40256  | TrGTerC  | BPINAOOH + OH → BPINAO2                                                                              | 1.33E-11                                         | Rickard and Pascoe (2009)                            |
| G40257  | TrGTerCN | BPINANO3 + OH → NOPINONE + HCHO + NO <sub>2</sub>                                                    | 4.70E-12                                         | Rickard and Pascoe (2009)                            |
| G40258a | TrGTerCN | ROO6R1O2 + NO → ROO6R3O2 + CH <sub>3</sub> COCH <sub>3</sub> + NO <sub>2</sub>                       | KR02N0*(1.-alpha_AN(13,3,0,0,0, temp, cair))     | Vereecken and Peeters (2012)                         |
| G40258b | TrGTerCN | ROO6R1O2 + NO → ROO6R1NO3                                                                            | KR02N0*alpha_AN(13,3,0,0,0, temp, cair)          | Vereecken and Peeters (2012)                         |
| G40259  | TrGTerC  | ROO6R1O2 + HO <sub>2</sub> → 10 LCARBON                                                              | KR02H02(10)                                      | Vereecken and Peeters (2012)*                        |
| G40260  | TrGTerC  | ROO6R1O2 → ROO6R3O2 + CH <sub>3</sub> COCH <sub>3</sub>                                              | k1_R02t0R02                                      | Vereecken and Peeters (2012)                         |
| G40261a | TrGTerCN | RO6R1O2 + NO → RO6R3O2 + NO <sub>2</sub>                                                             | KR02N0*(1.-alpha_AN(12,3,0,0,0, temp, cair))     | Vereecken and Peeters (2012)                         |
| G40261b | TrGTerCN | RO6R1O2 + NO → RO6R1NO3                                                                              | KR02N0*alpha_AN(12,3,0,0,0, temp, cair)          | Vereecken and Peeters (2012)                         |
| G40262  | TrGTerC  | RO6R1O2 + HO <sub>2</sub> → 10 LCARBON                                                               | KR02H02(10)                                      | Vereecken and Peeters (2012)*                        |
| G40263  | TrGTerC  | RO6R1O2 → RO6R3O2                                                                                    | k1_R02s0R02                                      | Vereecken and Peeters (2012)                         |
| G40264a | TrGTerCN | RO6R3O2 + NO → 9 LCARBON + HCHO + HO <sub>2</sub> + NO <sub>2</sub>                                  | KR02N0*(1.-alpha_AN(12,3,0,0,0, temp, cair))     | Vereecken and Peeters (2012)                         |
| G40264b | TrGTerCN | RO6R3O2 + NO → 10 LCARBON + LNITROGEN                                                                | KR02N0*alpha_AN(12,3,0,0,0, temp, cair)          | Vereecken and Peeters (2012)                         |
| G40265  | TrGTerC  | RO6R3O2 + HO <sub>2</sub> → 10 LCARBON                                                               | KR02H02(10)                                      | Vereecken and Peeters (2012)                         |
| G40266  | TrGTerC  | RO6R3O2 → 9 LCARBON + HCHO + HO <sub>2</sub>                                                         | k1_R02sR02                                       | Vereecken and Peeters (2012)*                        |
| G40267a | TrGTerC  | BPINENE + O <sub>3</sub> → NOPINONE + .63 CO + .37 CH <sub>2</sub> OO + .16 OH + .16 HO <sub>2</sub> | 1.35E-15*EXP(-1270./TEMP) * .051/(1-.027)        | T. J. Wallington et al. (2014)*                      |
| G40267b | TrGTerC  | BPINENE + O <sub>3</sub> → NOPINOO + CO <sub>2</sub>                                                 | 1.35E-15*EXP(-1270./TEMP) * .368/(1-.027)        | Nguyen et al. (2009), T. J. Wallington et al. (2014) |
| G40267c | TrGTerC  | BPINENE + O <sub>3</sub> → NOPINDO2 + CO <sub>2</sub> + OH                                           | 1.35E-15*EXP(-1270./TEMP) * .283/(1-.027)        | Nguyen et al. (2009), T. J. Wallington et al. (2014) |
| G40267d | TrGTerC  | BPINENE + O <sub>3</sub> → C8BC + 2 CO <sub>2</sub>                                                  | 1.35E-15*EXP(-1270./TEMP) * (.104+.167)/(1-.027) | Nguyen et al. (2009), T. J. Wallington et al. (2014) |
| G40268  | TrGTerCN | BPINENE + NO <sub>3</sub> → LNBPINABO2                                                               | 2.51E-12                                         | T. J. Wallington et al. (2014)*                      |
| G40269  | TrGTerCN | LNBPINABO2 + HO <sub>2</sub> → LNBPINABOOH                                                           | KR02H02(10)                                      | Rickard and Pascoe (2009)                            |
| G40270  | TrGTerCN | LNBPINABO2 + NO → NOPINONE + HCHO + NO <sub>2</sub> + NO <sub>2</sub>                                | KR02N0                                           | Rickard and Pascoe (2009)*                           |

Table 1: Gas phase reactions (... continued)

| #       | labels   | reaction                                                                           | rate coefficient                                              | reference                                            |
|---------|----------|------------------------------------------------------------------------------------|---------------------------------------------------------------|------------------------------------------------------|
| G40271  | TrGTerCN | LNBPINABO2 + NO <sub>3</sub> → NOPINONE + HCHO + NO <sub>2</sub> + NO <sub>2</sub> | KR02N03                                                       | Rickard and Pascoe (2009)                            |
| G40272a | TrGTerCN | LNBPINABO2 → NOPINONE + HCHO + NO <sub>2</sub>                                     | k1_R02tR02*0.7                                                | Rickard and Pascoe (2009)                            |
| G40272b | TrGTerCN | LNBPINABO2 → BPINANO3                                                              | k1_R02tR02*0.3                                                | Rickard and Pascoe (2009)                            |
| G40273  | TrGTerCN | LNBPINABOOH + OH → LNBPINABO2                                                      | 9.58E-12                                                      | Rickard and Pascoe (2009)                            |
| G40274  | TrGTerCN | ROO6R1NO3 + OH → ROO6R3O2 + CH <sub>3</sub> COCH <sub>3</sub> + NO <sub>2</sub>    | 9.16E-13                                                      | Vereecken and Peeters (2012), Gill and Hites (2002)* |
| G40275  | TrGTerCN | RO6R1NO3 + OH → 9 LCARBON + HCHO + HO <sub>2</sub> + NO <sub>2</sub>               | 9.16E-13                                                      | Vereecken and Peeters (2012), Gill and Hites (2002)  |
| G40276  | TrGTerC  | PINEOL + OH → HCOOH + OH + NORPINAL                                                | k_CH2CHOH_OH_HCOOH                                            | Taraborrelli (2016), So et al. (2014)*               |
| G40277  | TrGTerC  | PINEOL + HCOOH → PINAL + HCOOH                                                     | k_CH2CHOH_HCOOH                                               | Taraborrelli (2016), daSilva (2010)*                 |
| G40278  | TrGTerC  | PINAL + HCOOH → PINEOL + HCOOH                                                     | k_ALD_HCOOH                                                   | Taraborrelli (2016), daSilva (2010)*                 |
| G40279a | TrGC     | CARENE + OH → LAPINABO2                                                            | 8.7E-11*(.50+.25)                                             | Wolfe et al. (2011), Taraborrelli (2016)             |
| G40279b | TrGC     | CARENE + OH → MENTHEN6ONE + HO <sub>2</sub>                                        | 8.7E-11*.25*.60                                               | Wolfe et al. (2011), Taraborrelli (2016)             |
| G40279c | TrGC     | CARENE + OH → ROO6R1O2                                                             | 8.7E-11*.25*.40                                               | Wolfe et al. (2011), Taraborrelli (2016)             |
| G40280a | TrGC     | CARENE + O <sub>3</sub> → APINBOO                                                  | 2.E-16*.50*.18                                                | Wolfe et al. (2011), Taraborrelli (2016)             |
| G40280b | TrGC     | CARENE + O <sub>3</sub> → PINONIC                                                  | 2.E-16*.50*.16                                                | Wolfe et al. (2011), Taraborrelli (2016)             |
| G40280c | TrGC     | CARENE + O <sub>3</sub> → OH + NORPINAL + CO + HO <sub>2</sub>                     | 2.E-16*.50*.66                                                | Wolfe et al. (2011), Taraborrelli (2016)             |
| G40280d | TrGC     | CARENE + O <sub>3</sub> → APINAOO                                                  | 2.E-16*.50*.12                                                | Wolfe et al. (2011), Taraborrelli (2016)             |
| G40280e | TrGC     | CARENE + O <sub>3</sub> → OH + C109O2                                              | 2.E-16*.50*(.22+.66)                                          | Wolfe et al. (2011), Taraborrelli (2016)             |
| G40281  | TrGCN    | CARENE + NO <sub>3</sub> → LNAPINABO2                                              | 9.5E-12                                                       | Wolfe et al. (2011), Taraborrelli (2016)             |
| G40282a | TrGTerC  | SABINENE + OH → BPINAO2                                                            | 1.47E-11*EXP(467./TEMP)<br>*(0.8326*0.3+0.068)/(0.8326+0.068) | Gill and Hites (2002)*                               |

Table 1: Gas phase reactions (... continued)

| #       | labels   | reaction                                                                                                                     | rate coefficient                                                                                              | reference                                               |
|---------|----------|------------------------------------------------------------------------------------------------------------------------------|---------------------------------------------------------------------------------------------------------------|---------------------------------------------------------|
| G40282b | TrGTerC  | SABINENE + OH $\rightarrow$ ROO6R1O2                                                                                         | $1.47\text{E-}11 \cdot \text{EXP}(467./\text{TEMP})$<br>$\cdot 0.8326 \cdot 0.7 / (0.8326 + 0.068)$           | Vereecken and Peeters (2012),<br>Gill and Hites (2002)* |
| G40283a | TrGTerC  | SABINENE + O <sub>3</sub> $\rightarrow$ NOPINONE + .63 CO + .37<br>HOCH <sub>2</sub> OOH + .16 OH + .16 HO <sub>2</sub>      | $1.35\text{E-}15 \cdot \text{EXP}(-1270./\text{TEMP})$<br>$\cdot 0.051 / (1 - .027)$                          | T. J. Wallington et al. (2014)*                         |
| G40283b | TrGTerC  | SABINENE + O <sub>3</sub> $\rightarrow$ NOPINOO + CO <sub>2</sub>                                                            | $1.35\text{E-}15 \cdot \text{EXP}(-1270./\text{TEMP})$<br>$\cdot 0.368 / (1 - .027)$                          | Nguyen et al. (2009), T. J.<br>Wallington et al. (2014) |
| G40283c | TrGTerC  | SABINENE + O <sub>3</sub> $\rightarrow$ NOPINDO2 + CO <sub>2</sub> + OH                                                      | $1.35\text{E-}15 \cdot \text{EXP}(-1270./\text{TEMP})$<br>$\cdot 0.283 / (1 - .027)$                          | Nguyen et al. (2009), T. J.<br>Wallington et al. (2014) |
| G40283d | TrGTerC  | SABINENE + O <sub>3</sub> $\rightarrow$ C8BC + 2 CO <sub>2</sub>                                                             | $1.35\text{E-}15 \cdot \text{EXP}(-1270./\text{TEMP})$<br>$\cdot (.104 + .167) / (1 - .027)$                  | Nguyen et al. (2009), T. J.<br>Wallington et al. (2014) |
| G40284  | TrGTerCN | SABINENE + NO <sub>3</sub> $\rightarrow$ LNBPINABO2                                                                          | 2.51E-12                                                                                                      | T. J. Wallington et al. (2014)*                         |
| G40285a | TrGTerC  | CAMPHENE + OH $\rightarrow$ BPINAO2                                                                                          | $1.47\text{E-}11 \cdot \text{EXP}(467./\text{TEMP})$<br>$\cdot (0.8326 \cdot 0.3 + 0.068) / (0.8326 + 0.068)$ | Gill and Hites (2002)*                                  |
| G40285b | TrGTerC  | CAMPHENE + OH $\rightarrow$ ROO6R1O2                                                                                         | $1.47\text{E-}11 \cdot \text{EXP}(467./\text{TEMP})$<br>$\cdot 0.8326 \cdot 0.7 / (0.8326 + 0.068)$           | Vereecken and Peeters (2012),<br>Gill and Hites (2002)* |
| G40286a | TrGTerC  | CAMPHENE + O <sub>3</sub> $\rightarrow$ NOPINONE + .63 CO + .37<br>HOCH <sub>2</sub> OOH + .16 OH + .16 HO <sub>2</sub>      | $1.35\text{E-}15 \cdot \text{EXP}(-1270./\text{TEMP})$<br>$\cdot 0.051 / (1 - .027)$                          | T. J. Wallington et al. (2014)*                         |
| G40286b | TrGTerC  | CAMPHENE + O <sub>3</sub> $\rightarrow$ NOPINOO + CO <sub>2</sub>                                                            | $1.35\text{E-}15 \cdot \text{EXP}(-1270./\text{TEMP})$<br>$\cdot 0.368 / (1 - .027)$                          | Nguyen et al. (2009), T. J.<br>Wallington et al. (2014) |
| G40286c | TrGTerC  | CAMPHENE + O <sub>3</sub> $\rightarrow$ NOPINDO2 + CO <sub>2</sub> + OH                                                      | $1.35\text{E-}15 \cdot \text{EXP}(-1270./\text{TEMP})$<br>$\cdot 0.283 / (1 - .027)$                          | Nguyen et al. (2009), T. J.<br>Wallington et al. (2014) |
| G40286d | TrGTerC  | CAMPHENE + O <sub>3</sub> $\rightarrow$ C8BC + 2 CO <sub>2</sub>                                                             | $1.35\text{E-}15 \cdot \text{EXP}(-1270./\text{TEMP})$<br>$\cdot (.104 + .167) / (1 - .027)$                  | Nguyen et al. (2009), T. J.<br>Wallington et al. (2014) |
| G40287  | TrGTerCN | CAMPHENE + NO <sub>3</sub> $\rightarrow$ LNBPINABO2                                                                          | 2.51E-12                                                                                                      | T. J. Wallington et al. (2014)*                         |
| G40400  | TrGAroC  | LHAROM + OH $\rightarrow$ .14 TLEPOXMUC + .03 C6H5CH2O2<br>+ .04 CRESOL + .79 TLBIPERO2 + .18 HO <sub>2</sub> + 4<br>LCARBON | 5.67E-11                                                                                                      | Rickard and Pascoe (2009)*                              |
| G40401  | TrGAroCN | LHAROM + NO <sub>3</sub> $\rightarrow$ C6H5CH2O2 + HNO <sub>3</sub> + 4<br>LCARBON                                           | 2.60E-15                                                                                                      | Rickard and Pascoe (2009)*                              |
| G9200   | StTrGS   | SO <sub>2</sub> + OH $\rightarrow$ H <sub>2</sub> SO <sub>4</sub> + HO <sub>2</sub>                                          | k_3rd(temp, cair, 3.3E-31, 4.3,<br>1.6E-12, 0., 0.6)                                                          | Sander et al. (2011)                                    |
| G9400a  | TrGCS    | DMS + OH $\rightarrow$ CH <sub>3</sub> SO <sub>2</sub> + HCHO                                                                | $1.13\text{E-}11 \cdot \text{EXP}(-253./\text{temp})$                                                         | Atkinson et al. (2004)*                                 |
| G9400b  | TrGCS    | DMS + OH $\rightarrow$ DMSO + HO <sub>2</sub>                                                                                | k_DMS_OH                                                                                                      | Atkinson et al. (2004)*                                 |
| G9401   | TrGCNS   | DMS + NO <sub>3</sub> $\rightarrow$ CH <sub>3</sub> SO <sub>2</sub> + HNO <sub>3</sub> + HCHO                                | $1.9\text{E-}13 \cdot \text{EXP}(520./\text{temp})$                                                           | Atkinson et al. (2004)                                  |

Table 1: Gas phase reactions (... continued)

| #        | labels   | reaction                                                                                                                                     | rate coefficient                                     | reference                                |
|----------|----------|----------------------------------------------------------------------------------------------------------------------------------------------|------------------------------------------------------|------------------------------------------|
| G9402    | TrGCS    | $\text{DMSO} + \text{OH} \rightarrow .6 \text{ SO}_2 + \text{HCHO} + .6 \text{ CH}_3 + .4 \text{ HO}_2 + .4 \text{ CH}_3\text{SO}_3\text{H}$ | 1.E-10                                               | Hynes and Wine (1996)                    |
| G9403    | TrGS     | $\text{CH}_3\text{SO}_2 \rightarrow \text{SO}_2 + \text{CH}_3$                                                                               | $1.8\text{E}13 \cdot \text{EXP}(-8661./\text{temp})$ | Barone et al. (1995)                     |
| G9404    | TrGS     | $\text{CH}_3\text{SO}_2 + \text{O}_3 \rightarrow \text{CH}_3\text{SO}_3$                                                                     | 3.E-13                                               | Barone et al. (1995)                     |
| G9405    | TrGS     | $\text{CH}_3\text{SO}_3 + \text{HO}_2 \rightarrow \text{CH}_3\text{SO}_3\text{H}$                                                            | 5.E-11                                               | Barone et al. (1995)                     |
| G9408    | StTrGS   | $\text{CH}_2\text{OO} + \text{SO}_2 \rightarrow \text{H}_2\text{SO}_4 + \text{HCHO}$                                                         | k_CH200_S02                                          | Welz et al. (2012), Stone et al. (2014)* |
| G9409    | TrGTerCS | $\text{NOPINOO} + \text{SO}_2 \rightarrow \text{NOPINONE} + \text{H}_2\text{SO}_4$                                                           | 7.E-14                                               | Rickard and Pascoe (2009)                |
| G9410    | TrGTerCS | $\text{APINAOO} + \text{SO}_2 \rightarrow \text{PINAL} + \text{H}_2\text{SO}_4$                                                              | 7.00E-14                                             | Rickard and Pascoe (2009)                |
| G9411    | TrGTerCS | $\text{APINBOO} + \text{SO}_2 \rightarrow \text{PINAL} + \text{H}_2\text{SO}_4$                                                              | 7.00E-14                                             | Rickard and Pascoe (2009)                |
| G9412    | TrGTerCS | $\text{MBOOO} + \text{SO}_2 \rightarrow \text{IBUTALOH} + \text{H}_2\text{SO}_4$                                                             | 7.00E-14                                             | Rickard and Pascoe (2009)                |
| G0070dCM | StTrG    | $\text{CH}_3\text{OOH} \rightarrow \text{CH}_3\text{OOH}$                                                                                    | 4.0/(680*100)                                        | see general notes*                       |
| G0055dUJ | StTrGC   | $\text{C511OOH} \rightarrow \text{C511OOHDummy}$                                                                                             | 4.0/(680*100)                                        | see general notes*                       |
| G0056dUJ | StTrGC   | $\text{C512OOH} \rightarrow \text{C512OOHDummy}$                                                                                             | 4.0/(680*100)                                        | see general notes*                       |
| G0057dUJ | StTrGC   | $\text{C513OOH} \rightarrow \text{C513OOHDummy}$                                                                                             | 4.0/(680*100)                                        | see general notes*                       |
| G0026dUJ | StTrGC   | $\text{ISOPBOOH} \rightarrow \text{ISOPBOOHDummy}$                                                                                           | 4.0/(680*100)                                        | see general notes*                       |
| G0028dUJ | StTrGC   | $\text{ISOPDOOH} \rightarrow \text{ISOPDOOHDummy}$                                                                                           | 4.0/(680*100)                                        | see general notes*                       |
| G0024dUJ | StTrGC   | $\text{C59OOH} \rightarrow \text{C59OOHDummy}$                                                                                               | 4.0/(680*100)                                        | see general notes*                       |
| G0070dUJ | StTrGC   | $\text{C85OOH} \rightarrow \text{C85OOHDummy}$                                                                                               | 4.0/(680*100)                                        | see general notes*                       |
| G0071dUJ | StTrGC   | $\text{C86OOH} \rightarrow \text{C86OOHDummy}$                                                                                               | 4.0/(680*100)                                        | see general notes*                       |
| G0068dUJ | StTrGC   | $\text{C812OOH} \rightarrow \text{C812OOHDummy}$                                                                                             | 4.0/(680*100)                                        | see general notes*                       |
| G0069dUJ | StTrGC   | $\text{C813OOH} \rightarrow \text{C813OOHDummy}$                                                                                             | 4.0/(680*100)                                        | see general notes*                       |
| G0076dUJ | StTrGC   | $\text{C96OOH} \rightarrow \text{C96OOHDummy}$                                                                                               | 4.0/(680*100)                                        | see general notes*                       |
| G0077dUJ | StTrGC   | $\text{C97OOH} \rightarrow \text{C97OOHDummy}$                                                                                               | 4.0/(680*100)                                        | see general notes*                       |
| G0079dUJ | StTrGC   | $\text{C98OOH} \rightarrow \text{C98OOHDummy}$                                                                                               | 4.0/(680*100)                                        | see general notes*                       |
| G0124dUJ | StTrGC   | $\text{PINALOOH} \rightarrow \text{PINALOOHDummy}$                                                                                           | 4.0/(680*100)                                        | see general notes*                       |
| G0044dUJ | StTrGC   | $\text{C106OOH} \rightarrow \text{C106OOHDummy}$                                                                                             | 4.0/(680*100)                                        | see general notes*                       |
| G0042dUJ | StTrGC   | $\text{BPINAOOH} \rightarrow \text{BPINAOOHDummy}$                                                                                           | 4.0/(680*100)                                        | see general notes*                       |
| G0045dUJ | StTrGC   | $\text{C109OOH} \rightarrow \text{C109OOHDummy}$                                                                                             | 4.0/(680*100)                                        | see general notes*                       |
| G0009dUJ | StTrG    | $\text{HCOOH} \rightarrow \text{HCOOHDummy}$                                                                                                 | 0.3/(680*100)                                        | see general notes*                       |
| G0010dUJ | StTrG    | $\text{HOCH}_2\text{OOH} \rightarrow \text{HOCH}_2\text{OOHDummy}$                                                                           | 4.0/(680*100)                                        | see general notes*                       |
| G0011dUJ | StTrGC   | $\text{C}_2\text{H}_5\text{OOH} \rightarrow \text{C}_2\text{H}_5\text{OOHDummy}$                                                             | 4.0/(680*100)                                        | see general notes*                       |
| G0081dUJ | StTrGC   | $\text{CH}_3\text{CHOHOOH} \rightarrow \text{CH}_3\text{CHOHOOHDummy}$                                                                       | 4.0/(680*100)                                        | see general notes*                       |
| G0121dUJ | StTrGC   | $\text{NOPINDOOH} \rightarrow \text{NOPINDOOHDummy}$                                                                                         | 4.0/(680*100)                                        | see general notes*                       |
| G0074dUJ | StTrGC   | $\text{C8BCOOH} \rightarrow \text{C8BCOOHDummy}$                                                                                             | 4.0/(680*100)                                        | see general notes*                       |

Table 1: Gas phase reactions (... continued)

| #        | labels  | reaction                                              | rate coefficient | reference          |
|----------|---------|-------------------------------------------------------|------------------|--------------------|
| G0062dUJ | StTrGC  | C721OOH $\rightarrow$ C721OOHDummy                    | 4.0/(680*100)    | see general notes* |
| G0064dUJ | StTrGC  | C722OOH $\rightarrow$ C722OOHDummy                    | 4.0/(680*100)    | see general notes* |
| G0085dUJ | StTrGC  | CO235C6OOH $\rightarrow$ CO235C6OOHDummy              | 4.0/(680*100)    | see general notes* |
| G0060dUJ | StTrGC  | C614OOH $\rightarrow$ C614OOHDummy                    | 4.0/(680*100)    | see general notes* |
| G0052dUJ | StTrGC  | C413COOOH $\rightarrow$ C413COOOHDummy                | 4.0/(680*100)    | see general notes* |
| G0053dUJ | StTrGC  | C44OOH $\rightarrow$ C44OOHDummy                      | 4.0/(680*100)    | see general notes* |
| G0021dUJ | StTrGC  | MACROOH $\rightarrow$ MACROOHDummy                    | 4.0/(680*100)    | see general notes* |
| G0083dUJ | StTrGC  | CHOC3COOOH $\rightarrow$ CHOC3COOOHDummy              | 4.0/(680*100)    | see general notes* |
| G0094dUJ | StTrGC  | LAPINABOOH $\rightarrow$ LAPINABOOHDummy              | 4.0/(680*100)    | see general notes* |
| G0013dUJ | StTrGCN | PAN $\rightarrow$ PANDummy                            | 0.2/(680*100)    | see general notes* |
| G0005dUJ | StTrGN  | NO <sub>3</sub> $\rightarrow$ NO <sub>3</sub> Dummy   | 4/(680*100)      | see general notes* |
| G0006dUJ | StTrGN  | HNO <sub>3</sub> $\rightarrow$ HNO <sub>3</sub> Dummy | 4/(680*100)      | see general notes* |
| G3116uj  | StTrGC  | MVK $\rightarrow$ MVKDummy                            | 1/(680*100)      | see general notes* |
| G3116ujb | StTrGC  | MACR $\rightarrow$ MACRDummy                          | 1/(680*100)      | see general notes* |
| G3119uj  | StTrGC  | PINAL $\rightarrow$ PINALDummy                        | 0.6/(680*100)    | see general notes* |

## General notes

### Three-body reactions

Rate coefficients for three-body reactions are defined via the function `k_3rd`( $T, M, k_0^{300}, n, k_{\text{inf}}^{300}, m, f_c$ ). In the code, the temperature  $T$  is called `temp` and the concentration of “air molecules”  $M$  is called `cair`. Using the auxiliary variables  $k_0(T)$ ,  $k_{\text{inf}}(T)$ , and  $k_{\text{ratio}}$ , `k_3rd` is defined as:

$$k_0(T) = k_0^{300} \times \left(\frac{300\text{K}}{T}\right)^n \quad (1)$$

$$k_{\text{inf}}(T) = k_{\text{inf}}^{300} \times \left(\frac{300\text{K}}{T}\right)^m \quad (2)$$

$$k_{\text{ratio}} = \frac{k_0(T)M}{k_{\text{inf}}(T)} \quad (3)$$

$$\mathbf{k\_3rd} = \frac{k_0(T)M}{1 + k_{\text{ratio}}} \times f_c^{\left(\frac{1}{1 + (\log_{10}(k_{\text{ratio}}))^2}\right)} \quad (4)$$

A similar function, called `k_3rd_iupac` here, is used by T. J. Wallington et al. (2014) for three-body reactions. It has the same function parameters as `k_3rd` and it is defined as:

$$k_0(T) = k_0^{300} \times \left(\frac{300\text{K}}{T}\right)^n \quad (5)$$

$$k_{\text{inf}}(T) = k_{\text{inf}}^{300} \times \left(\frac{300\text{K}}{T}\right)^m \quad (6)$$

$$k_{\text{ratio}} = \frac{k_0(T)M}{k_{\text{inf}}(T)} \quad (7)$$

$$N = 0.75 - 1.27 \times \log_{10}(f_c) \quad (8)$$

$$\mathbf{k\_3rd\_iupac} = \frac{k_0(T)M}{1 + k_{\text{ratio}}} \times f_c^{\left(\frac{1}{1 + (\log_{10}(k_{\text{ratio}})/N)^2}\right)} \quad (9)$$

### RO<sub>2</sub> self and cross reactions

The self and cross reactions of organic peroxy radicals are treated according to the permutation reaction formalism as implemented in the MCM (Rickard and Pascoe, 2009), as described by Jenkin et al. (1997). Every organic peroxy radical reacts in a pseudo-first-order reaction with a rate constant that is expressed as  $k^{1\text{st}} = 2 \times \sqrt{k_{\text{self}} \times k_{\text{CH3O2}}} \times [\text{RO}_2]$  where  $k_{\text{self}}$  = second-order rate coefficient of the self reaction of the organic peroxy radical,  $k_{\text{CH3O2}}$  = second-order rate coefficient of the self reaction of CH<sub>3</sub>O<sub>2</sub>, and  $[\text{RO}_2]$  = sum of the concentrations of all organic peroxy radicals.

### Deposition of peroxides

The value of 4.0/(680\*100) is based on deposition velocities for peroxides obtained by ?. The PBL height of 680 m is based on 120 hour FlexPart (<https://www.flexpart.eu>) backtrajectory simulations. The deposition of PAN is based on ?.

## Specific notes

G2110: The rate coefficient is: `k_HO2_HO2 = (3.0E-13*EXP(460./temp)+2.1E-33*EXP(920./temp)*cair)*(1.+1.4E-21*EXP(2200./temp)*C(ind_H2O))`. The value for the first (pressure-independent) part is from Christensen et al. (2002), the water term from Kircher and Sander (1984).

G2117: Converted to  $K_c [\text{molec}^{-1} \text{cm}^3] = K_p * R * T / NA$ , where  $R$  is 82.05736 [cm<sup>3</sup>atmK<sup>-1</sup>mol<sup>-1</sup>].

G2118: Assuming fast equilibrium.

G3109: The rate coefficient is: `k_NO3_NO2 = k_3rd(temp,cair,2.E-30,4.4,1.4E-12,0.7,0.6)`.

G3110: The rate coefficient is defined as backward reaction divided by equilibrium constant.

G3203: The rate coefficient is: `k_NO2_HO2 = k_3rd(temp,cair,1.8E-31,3.2,4.7E-12,1.4,0.6)`.

G3206: The rate coefficient is: `k_HNO3_OH = 2.4E-14 * EXP(460./temp) + 1./ ( 1./ (6.5E-34 * EXP(1335./temp)*cair) + 1./ (2.7E-17 * EXP(2199./temp)) )`

G3207: The rate coefficient is defined as backward reaction divided by equilibrium constant.

G4104b: Methyl nitrate yield according to Banic et al. (2003) but reduced by a factor of 10 according to the upper limit derived from measurements by Munger et al. (1999).

G4116: Same value as for PAN + OH.

G4126: Same as for G4104 but scaled to match the recommended value at 298K.

G4127: Same as for CH<sub>3</sub>O<sub>2</sub> + NO<sub>3</sub> in G4105.

G4130a: SAR for H-abstraction by OH.

G4130b: SAR for H-abstraction by OH.

G4132: SAR for H-abstraction by OH.

G4133: Lower limit of the rate constant. Products uncertain but CH<sub>3</sub>OH can be excluded because of a likely high energy barrier (L. Vereecken, pers. comm.). CH<sub>2</sub>OO production cannot be excluded.

G4134: Estimate based on the decomposition lifetime of 3 s (Olzmann et al., 1997) and a 20 kcal/mol energy barrier (Vereecken and Francisco, 2012).

G4135: Rate constant for CH<sub>2</sub>OO + NO<sub>2</sub> (G4138) multiplied by the factor from Ouyang et al. (2013).

G4136: Average of two measurements.

G4137: Upper limit.

G4138: Average of 7.E-12 and 1.5E-12.

G4141:  $\text{HOOCH}_2\text{OCHO}$  forms and then decomposes to formic anhydride (Gruzdev et al., 1993) which hydrolyses in the humid atmosphere (Conn et al., 1942).

G4142: High-pressure limit.

G4143: Generic estimate for reaction with alcohols.

G4144: Generic estimate for reaction with  $\text{RO}_2$ .

G4149: Barnes et al. (1985) estimated a decomposition rate equal to that of  $\text{CH}_3\text{O}_2\text{NO}_2$ .

G4150: Value for  $\text{CH}_3\text{O}_2\text{NO}_2 + \text{OH}$ , H-abstraction enhanced by the HO-group by  $f_{\text{soh}}$ .

G4154: Products assumed to be  $\text{CH}_3\text{O}_2 + \text{O}_2$  (could also be  $\text{HCHO} + \text{O}_2 + \text{OH}$ ).

G4160b: Half of the H-yield is attributed to fast secondary chemistry.

G4160c: The  $\text{NH} + \text{CO}$  channel is also significant but neglected here.

G4161: No studies below 450 K and only the major channel is considered.

G4164: Upper limit. Dominant pathway under atmospheric conditions.

G42001: The product distribution is from Rickard and Pascoe (2009), after substitution of the energized Criegee intermediate,  $\text{CH}_2\text{OO}$ , by its decomposition products and reaction of the stabilized CI with the water dimer.

G42010: Only major channel considered as the end products are essentially the same.

G42013: The rate coefficient is:  $k_{\text{CH}_3\text{CO}_3\text{NO}_2} = k_{3\text{rd}}(\text{temp}, \text{cair}, 9.7\text{E}-29, 5.6, 9.3\text{E}-12, 1.5, 0.6)$ .

G42018: The rate coefficient is the same as for the  $\text{CH}_3$  channel in G4107 ( $\text{CH}_3\text{OOH} + \text{OH}$ ).

G42021: The rate coefficient is  $k_{\text{PAN}_M} = k_{\text{CH}_3\text{CO}_3\text{NO}_2/9.9\text{E}-29*\text{EXP}(-14000./\text{temp})$ , i.e. the rate coefficient is defined as backward reaction divided by equilibrium constant.

G42024a: Rate constant is the high-pressure limit as recommended by Atkinson et al. (2006).

G42024b: Rate constant is the high-pressure limit as recommended by Atkinson et al. (2006).

G42047: Orlando et al. (1998) estimated that about 25% of the  $\text{HOCH}_2\text{CH}_2\text{O}$  in this reaction is produced with sufficient excess energy that it decomposes promptly. The decomposition products are  $2 \text{HCHO} + \text{HO}_2$ .

G42051a: Same as for the  $\text{CH}_3\text{O}_2$  channel in G4107:  $\text{CH}_3\text{OOH} + \text{OH}$ .

G42058b: The aldehydic H is assumed to be like the analogous H of  $\text{HOCH}_2\text{CHO}$ .

G42074a: Factor of 3 to match the estimate of  $k = 1.\text{E}-11 \text{ molec/cm}^3/\text{s}$  by Paulot et al. (2009a).

G42074b: Factor of 3 to match the estimate of  $k = 1.\text{E}-11 \text{ molec/cm}^3/\text{s}$  by Paulot et al. (2009a).

G42075:  $\text{NO}_3\text{CH}_2\text{CO}_2\text{H}$  and  $\text{NO}_3\text{CH}_2\text{CO}_3\text{H}$  neglected.

G42078:  $\text{NO}_3\text{CH}_2\text{CO}_2\text{H}$  neglected.

G42082: Same rate constant as for  $\text{PAN} + \text{OH}$ .

G42083a: Rate constant is the high-pressure limit as recommended by Atkinson et al. (2006).

G42083b: Rate constant is the high-pressure limit as recommended by Atkinson et al. (2006).

G42085a: Uncertainties on the kinetics at pressures  $< 0.1 \text{ bar}$ .

G42085b: Channel proposed by Hynes and Wine 1991,  $\text{OH} + \text{HCHO} + \text{HOCN}$ , could not be confirmed by

Tyndall et al. (2001b). There is no alternative mechanism at the moment. Products assumed to be  $\text{OH} + \text{CH}_3\text{CO}_3 + \text{NO}$

G42086b: Assuming HCN is from channel 2h,  $\text{HCO} + \text{H} + \text{HCN}$ . HCO is replaced by  $\text{H} + \text{CO}$ .

G42086c: Assuming exothermic channels 2b and 2d are equally important.

G42087:  $\text{HCOCN}$  is produced but replaced here by its likely oxidation products ( $\text{HCN} + \text{CO}_2$ ) as studied by Tyndall et al. (2001b). The rate constant for a typical  $\text{RO}_2 + \text{NO}$  reaction is used.

G42088:  $\text{NCCH}_2\text{OOH}$  is produced but replaced here by its likely oxidation products ( $\text{HCN} + \text{CO}_2$ ) as studied by Tyndall et al. (2001b). The rate constant for a typical  $\text{RO}_2 + \text{HO}_2$  reaction is used.

G42089a: The minor channel with  $k=5.2\text{E}-12$  is combined with the major one producing  $\text{HCOOH}$ .

G42090: Theoretical keto-enol tautomerization catalyzed by formic acid (Grenfell et al., 2006).

G42091: Theoretical keto-enol tautomerization catalyzed by formic acid (Grenfell et al., 2006).

G43001a: Branching ratios according to Rickard et al. (1999).

G43001b: Branching ratios according to Rickard et al. (1999).

G43004: The value for the generic  $\text{RO}_2 + \text{HO}_2$  reaction from Atkinson (1997) is used here.

G43008: The value for the generic  $\text{RO}_2 + \text{HO}_2$  reaction from Atkinson (1997) is used here.

G43011: Strong positive deviation of  $k$  below 240 K compared to the expression recommended by JPL (Sander et al., 2011).

G43015a: The same value as for G4107 ( $\text{CH}_3\text{OOH} + \text{OH}$ ) is used, multiplied by the branching ratio of the  $\text{CH}_3\text{O}_2$  channel.

G43028: Alkyl nitrate formation neglected. (also not considered in MCM).

G43037: Alkyl nitrate formation neglected. (also not considered in MCM).

G43040a: Rate coefficient estimated with SAR (Taraborrelli, 2010).

G43040b: Rate coefficient estimated with SAR (Taraborrelli, 2010).

G43044: Alkyl nitrate formation neglected.

G43045c: Rate coefficient assumed to equal to the one of hydroxyacetone (ACETOL) for this channel.

G43048: Using the high-pressure limit.

G43049: The pressure fall-off between 1000 and 100 mbar is only 3% (Kirchner et al., 1999).

G43050: Value for  $\text{CH}_3\text{O}_2\text{NO}_2 + \text{OH}$ , H-abstraction enhanced by the  $\text{CH}_3\text{CO}$ -group by  $f_{\text{co}}$ .

G43051c: Products approximated with  $\text{C}_2\text{H}_5\text{CHO} + \text{HO}_2$ .

G43052: Only major H-abstraction channel considered.

G43059: Products approximated with the major end-product  $\text{CH}_3\text{CHO}$ .

G43060b: Products approximated with the major end-product  $\text{CH}_3\text{CHO}$ .

G43061: Products approximated with the likely end-product  $\text{CH}_3\text{CHO}$ .

G43065: As for  $\text{HCOCO}_3$ .

G43070a: Branching ratios estimated with SAR for H-abstraction rate constants by OH.

G43070b: Branching ratios estimated with SAR for H-abstraction rate constants by OH.

G43071a: Only this channel considered as the intermediate radical is likely more stable than  $\text{CHCH}(\text{OH})_2$ .

G43072: Theoretical keto-enol tautomerization catalyzed by formic acid (Grenfell et al., 2006).

G43073: Theoretical keto-enol tautomerization catalyzed by formic acid (Grenfell et al., 2006).

G43074:  $\text{HCOCOCHO}$  would be produced but undergoes fast photolysis (faster than  $\text{MGLYOX}$ ) and is substituted with its products.

G43223: Products simplified

G43419:  $\text{KDEC C3DIALO} \rightarrow \text{GLYOX} + \text{CO} + \text{HO}_2$

G43420:  $\text{KDEC C3DIALO} \rightarrow \text{GLYOX} + \text{CO} + \text{HO}_2$

G43421: Permutation reaction (minor channels removed).

G44000: The  $\text{LC}_4\text{H}_9\text{O}_2$  composition ( $\text{nC}_4\text{H}_9\text{O}_2:\text{sC}_4\text{H}_9\text{O}_2$  ratio) is assumed to be equal to the ratio of the production rates at 298K:  $k_{\text{p}}/(k_{\text{p}}+k_{\text{s}}) = 0.1273$  and  $k_{\text{s}}/(k_{\text{p}}+k_{\text{s}}) = 0.8727$ .

G44001b:  $\text{sC}_4\text{H}_9\text{O}_2$  products are substituted with 0.636 MEK +  $\text{HO}_2$  and 0.364  $\text{CH}_3\text{CHO} + \text{C}_2\text{H}_5\text{O}_2$  at 1 bar and 298 K.

G44003c: The alkyl nitrate yield is the weighted average yield for the two isomers forming from  $\text{nC}_4\text{H}_9\text{O}_2$  and  $\text{sC}_4\text{H}_9\text{O}_2$ .

G44010b: H-abstraction from primary C and substitution of the resulting peroxy radical with its products from the reaction with NO.

G44011: H-abstraction from primary C and substitution of the resulting peroxy radical with its products from the reaction with NO.

G44015b: Products assumed to be only from H-abstraction from a secondary C bearing the -OOH group.

G44016: Products assumed to be only from H-abstraction from a secondary C bearing the -ONO<sub>2</sub> group.

G44018: LHMVKABO<sub>2</sub> is  $0.12 \text{ HMVKAO}_2 + 0.88 \text{ HMVKBO}_2$ .

G44019: LMEKO<sub>2</sub> represents  $0.62 \text{ MEKBO}_2 + 0.38 \text{ MEKAO}_2$ .

G44021a: The products of MEKAO are substituted with  $\text{HCHO} + \text{CO}_2 + \text{HOCH}_2\text{CH}_2\text{O}_2$ .

G44023a: Products from H-abstraction from the tertiary carbon bearing the ONO<sub>2</sub> group.

G44023b: Products from H-abstraction from the secondary carbon bearing the ONO<sub>2</sub> group.

G44025: Same value as for PAN.

G44026: Products as in G4415. Only the main channels for each isomer are considered. Weighted average for the isomers.

G44035: Rate constant replaced with the one of beta hydroxy RO<sub>2</sub>.

G44046b: Using value for secondary nitrate (88% of total).

G44061a: Using value for secondary nitrate (88% of total).

G44061b: Using value for secondary nitrate (88% of total).

G44062a: Simplified products.

G44062b: Simplified products.

G44066: Alkyl nitrate formation neglected.

G44070: Alkyl nitrate formation neglected.

G44076: Alkyl nitrate formation neglected.

G44078: Other channel neglected.

G44081: Alkyl nitrate formation neglected.

G44082: Other channel neglected.

G44085:  $k$  for  $\text{CH}_3\text{CHCO}$  from Hatakeyama et al. (1985) adjusted.

G44086: Simplified product distribution.

G44089: The nitrated RO<sub>2</sub> is replaced by its products upon reaction with NO.

G44096: Both LBUT1ENO2 isomers mostly C<sub>2</sub>H<sub>5</sub>CHO.

G44097a: Branching ratios according to Rickard et al. (1999). CH<sub>3</sub>CHO<sub>2</sub>CHO is replaced with its major products CH<sub>3</sub>CHO + CO + HO<sub>2</sub>.

G44097b: Branching ratios according to Rickard et al. (1999).

G44098: The nitrated RO<sub>2</sub> is replaced by its products upon reaction with NO.

G44103b: MEKCOH replaced by its major oxidation products.

G44104: Carbonyl nitrate replaced by its major oxidation products.

G44106: CH<sub>3</sub>CHOOA products as from C<sub>3</sub>H<sub>6</sub> + O<sub>3</sub> reaction.

G44107: The nitrated RO<sub>2</sub> is replaced by its products upon reaction with NO.

G44110: The nitrated RO<sub>2</sub> is replaced by its products upon reaction with NO.

G44124b: Skipping intermediate steps mostly leading to acetone.

G44126: Skipping intermediate steps mostly leading to acetone.

G44127: Only this channel considered as the intermediate radical is likely more stable than CHCH(OH)<sub>2</sub>.

G44128: Theoretical keto-enol tautomerization catalyzed by formic acid (Grenfell et al., 2006).

G44129: Theoretical keto-enol tautomerization catalyzed by formic acid (Grenfell et al., 2006).

G44130: Only this channel considered as the intermediate radical is likely more stable than CHCH(OH)<sub>2</sub>.

G44131: Theoretical keto-enol tautomerization catalyzed by formic acid (Grenfell et al., 2006).

G44132: Theoretical keto-enol tautomerization catalyzed by formic acid (Grenfell et al., 2006).

G44133: Only this channel considered as the intermediate radical is likely more stable than CHCH(OH)<sub>2</sub>.

G44134: Theoretical keto-enol tautomerization catalyzed by formic acid (Grenfell et al., 2006).

G44135: Theoretical keto-enol tautomerization catalyzed by formic acid (Grenfell et al., 2006).

G44136: Only this channel considered as the intermediate radical is likely more stable than CHCH(OH)<sub>2</sub>.

G44137: Theoretical keto-enol tautomerization catalyzed by formic acid (Grenfell et al., 2006).

G44138: Theoretical keto-enol tautomerization catalyzed by formic acid (Grenfell et al., 2006).

G44139: Simplified oxidation.

G44140: Simplified oxidation.

G44141: Simplified oxidation.

G44142: Simplified oxidation.

G44202: Alkyl nitrate formation neglected.

G44203a: Rate coefficient estimated with SAR (Taraborrelli, 2010).

G44205: Alkyl nitrate formation neglected.

G44210: Alkyl nitrate formation neglected.

G44221: Same k as for MGLYOX + OH (Tyndall et al., 1995).

G44402: KDEC NC<sub>4</sub>DCO<sub>2</sub> → MALANHY + NO<sub>2</sub>

G44406c: KDEC MALDIALCO<sub>2</sub> → .6 MALANHY + HO<sub>2</sub> + .4 GLYOX + .4 CO + .4 CO<sub>2</sub>

G44407: KDEC MALDIALCO<sub>2</sub> → .6 MALANHY + HO<sub>2</sub> + .4 GLYOX + .4 CO + .4 CO<sub>2</sub>

G44409: KDEC MALDIALCO<sub>2</sub> → .6 MALANHY + HO<sub>2</sub> + .4 GLYOX + .4 CO + .4 CO<sub>2</sub>

G44410: KDEC MALDIALCO<sub>2</sub> → .6 MALANHY + HO<sub>2</sub> + .4 GLYOX + .4 CO + .4 CO<sub>2</sub>

G44412: KDEC BZFUONOOA → .5 BZFUONOO + .5 CO + .5 CO<sub>2</sub> + .5 HCOCH<sub>2</sub>O<sub>2</sub> + .5 OH and BZFUONOO → .625 CO<sub>14</sub>O<sub>3</sub>CO<sub>2</sub>H + .375 CO<sub>14</sub>O<sub>3</sub>CHO + .375 H<sub>2</sub>O<sub>2</sub>

G44421: Only major channel.

G44424: KDEC: GLYOOA → .125 HCHO + .18 GLYOO + 0.82 HO<sub>2</sub> + .57 OH + 1.265 CO + .25 CO<sub>2</sub> and H<sub>2</sub>O substitution GLYOO → .625 HCOCO<sub>2</sub>H + .375 GLYOX + .375 H<sub>2</sub>O<sub>2</sub>

G44425: Merged equations.

G44430: KDEC MALANHYO → HCOCO<sub>2</sub>HCO<sub>3</sub>

G44431: KDEC MALANHYO → HCOCO<sub>2</sub>HCO<sub>3</sub>

G44432: Only major channel. KDEC MALANHYO → HCOCO<sub>2</sub>HCO<sub>3</sub>

G44436: KDEC NBZFUO → .5 CO<sub>14</sub>O<sub>3</sub>CHO + .5 NO<sub>2</sub> + .5 NBZFUONE + .5 HO<sub>2</sub>

G44437: KDEC NBZFUO → .5 CO<sub>14</sub>O<sub>3</sub>CHO + .5 NO<sub>2</sub> + .5 NBZFUONE + .5 HO<sub>2</sub>

G44438: KDEC NBZFUO → .5 CO<sub>14</sub>O<sub>3</sub>CHO + .5 NO<sub>2</sub> + .5 NBZFUONE + .5 HO<sub>2</sub> and RO<sub>2</sub> Only major channel.

G44439: KDEC MALDIALCO<sub>2</sub> → .6 MALANHY + HO<sub>2</sub> + .4 GLYOX + .4 CO + .4 CO<sub>2</sub>

G44443: KDEC MECOACETO → CH<sub>3</sub>CO<sub>3</sub> + HCHO

G44444: KDEC MECOACETO → CH<sub>3</sub>CO<sub>3</sub> + HCHO

G44445: KDEC MECOACETO → CH<sub>3</sub>CO<sub>3</sub> + HCHO

G44450: KDEC BZFUO → CO<sub>14</sub>O<sub>3</sub>CHO + HO<sub>2</sub>

G44451: KDEC BZFUO → CO<sub>14</sub>O<sub>3</sub>CHO + HO<sub>2</sub>

G44452: KDEC BZFUO → CO<sub>14</sub>O<sub>3</sub>CHO + HO<sub>2</sub>. Only major channel.

G44457: KDEC MALDIALO  $\rightarrow$  GLYOX + GLYOX + HO2

G44458: KDEC MALDIALO  $\rightarrow$  GLYOX + GLYOX + HO2

G44459: KDEC MALDIALO  $\rightarrow$  GLYOX + GLYOX + HO2. Only major channel.

G44461: KBPAN  $\rightarrow$  k.PAN\_M

G45019d: Delta-1 and delta-2 LIEPOX are not considered and replaced by beta-LIEPOX formed by ISOP-BOOH and ISOPDOOH.

G45021: SAR estimate within uncertainty range of the experimentally determined rate constant by Solberg et al. (1997), 1.1E-11.

G45037: SAR estimate within uncertainty range of the experimentally determined rate constant by Solberg et al. (1997), 4.2E-11.

G45040: Alkyl nitrate formation neglected.

G45043: Old MCM rate constant 4.16E-11.

G45047: Alkyl nitrate formation neglected.

G45055: Alkyl nitrate formation neglected.

G45071: Alkyl nitrate formation neglected.

G45074: Formic acid production consistent with results of Bates et al. (2014). Here, the high yields of formic acid and hydroxycarbonyls at low NO from oxidation of cis-beta-LIEPOX (the most abundant isomer) are approximated with the production of DB1O which undergo both the Dibble double H-transfer to DB2O2 and HOCH2 elimination yielding HVMK and HMAK (keto-vinyl alcohol potentially arising from decomposition of the alkoxy radical resulting from the ring opening after H-abstraction). The rate constant is from Paulot et al. (2009b) and adjusted based on Bates et al. (2014) that determined the single rate constants for the cis- and trans- beta isomer.

G45080: Alkyl nitrate formation neglected.

G45092a: ZCODC23DBCOD = CM4DIAL in MCM only from aromatics.

G45092b: Only one acyl peroxy radical considered.

G45093: Two aldehydic sites reacting with NO<sub>3</sub> but only one isomer product considered.

G45095: Alkyl nitrate formation neglected.

G45098: Alkyl nitrate formation neglected.

G45100: Alkyl nitrate formation neglected.

G45104a: DB1OOH is a hydroperoxide bearing a vinyl alcohol moiety that upon reaction with OH yields HCOOH (Davis et al., 1998).

G45107: OH production here is to take into account the hydroperoxidic function formed by the shift of the enolic hydrogen and not present in DB2O2. This approximation leads to spurious HO<sub>2</sub> production.

G45108a: Consistent with the results of Bates et al. (2014).

G45108b: Consistent with the results of Bates et al. (2014). Assuming that the enol alkoxy radical partly decomposes yielding a substitute vinyl alcohol.

G45111: Alkyl nitrate formation neglected.

G45114b: Here, formic acid is mechanistically produced by the OH-addition to the vinyl alcohol which, upon RO<sub>2</sub>-to-RO conversion (skipped here), yields the HOCHOH fragment which in turn reacts with O<sub>2</sub> forming HCOOH + HO<sub>2</sub>. Along CH<sub>3</sub>COCHOOHCHO should be produced but not in the mechanism. Only CH<sub>3</sub>COCHO<sub>2</sub>CHO. The rate constant is consistent with predictions by Ganzeveld et al. (2006) for ENOL. OH-addition to the OH-bearing carbon is considered the dominant channel as it is already for the ENOL (Ganzeveld et al., 2006).

G45115: Theoretical keto-enol tautomerization catalyzed by formic acid (Grenfell et al., 2006). The product should be C1ODC3OOHC4OD but it is neglected in the mechanism.

G45116: As for DB1OOH + OH.

G45117: Additional sinks for DB2OOH are neglected.

G45121b: Nitrate assumed to be major isomer that is mostly similar to products of ISOPDO2-chemistry.

G45128: Rate constant by Liljegren and Stevens (2013). A lumped RO<sub>2</sub> that upon conversion to RO yields 100% 2-methyl-butenedial (ZCODC23DBCOD) although Aschmann et al. (2014) quantified a 38% yield of the Z/E mixture.

G45129: As for 3METHYLFURAN + OH but with additional NO<sub>2</sub> production for mass conservation.

G45131: Alkyl nitrate formation neglected.

G45132: Hydroperoxide formation neglected.

G45134b: ZCO2HC23DBCOD formation is neglected. However, it is produced in MCM and in aromatic-related reactions under the name of MC3ODBCO2H.

G45139: ZCPANC23DBCOD is assumed to react like LC5PAN1719.

G45201: Alkyl nitrate formation neglected.

G45207: Alkyl nitrate formation neglected.

G45214: Alkyl nitrate formation neglected.

G45217: Alkyl nitrate formation neglected.

G45225: Alkyl nitrate formation neglected.

G45236: LMBOABO2 = .67 MBOAO2 + .33 MBOBO2

G45247: Alkyl nitrate formation neglected.

G45400: KDEC NC4MDCO2  $\rightarrow$  MMALANHY + NO2

G45404: KDEC NTLFUO  $\rightarrow$  ACCOMECHO + NO2

G45405: KDEC NTLFUO  $\rightarrow$  ACCOMECHO + NO2

G45406: KDEC NTLFUO  $\rightarrow$  ACCOMECHO

G45409: KBPAN  $\rightarrow$  k.PAN\_M(renaming)

G45413: KFPAN  $\rightarrow$  k.CH3CO3.NO2 (renaming)

G45422: KDEC MMALANHYO  $\rightarrow$  CO2H3CO3

G45423: KDEC MMALANHYO  $\rightarrow$  CO2H3CO3

G45424: KDEC MMALANHYO  $\rightarrow$  CO2H3CO3 and Only major channel.

G45429: KBPAN  $\rightarrow$  k.PAN.M (renamed)

G45430a: KDEC C5CO14CO2  $\rightarrow$  .83 MALANHY + .83 CH3 + .17 MGLYOX + .17 HO2 + .17 CO + .17 CO2

G45431: KDEC C5CO14CO2  $\rightarrow$  .83 MALANHY + .83 CH3 + .17 MGLYOX + .17 HO2 + .17 CO + .17 CO2

G45432: KFPAN  $\rightarrow$  k.CH3CO3.NO2 (renaming)

G45433: KDEC C5CO14CO2  $\rightarrow$  .83 MALANHY + .83 CH3 + .17 MGLYOX + .17 HO2 + .17 CO + .17 CO2

G45434: KDEC C5CO14CO2  $\rightarrow$  .83 MALANHY + .83 CH3 + .17 MGLYOX + .17 HO2 + .17 CO + .17 CO2 and only major channel.

G45436: KDEC C5CO14CO2  $\rightarrow$  .83 MALANHY + .83 CH3 + .17 MGLYOX + .17 HO2 + .17 CO + .17 CO2

G45444: KDEC MC3CODBCO2  $\rightarrow$  .35 GLYOX + .35 CH3 + .35 CO + .35 CO2 + .65 MMALANHY + .65 HO2

G45452: KDEC TLFUONOOA  $\rightarrow$  .5 CO + .5 OH + .5 MECOACETO2 + .5 TLFUONOO and H2O subs TLFUONOO  $\rightarrow$  .625 C24O3CCO2H + .375 ACCOMECHO + .375 H2O2

G45456: KFPAN  $\rightarrow$  k.CH3CO3.NO2 (renaming)

G45476b: KDEC NTLFUO  $\rightarrow$  ACCOMECHO + NO2 and reactions with KRO2HO2.

G45477: KDEC NTLFUO  $\rightarrow$  ACCOMECHO + NO2

G45478: KDEC NTLFUO  $\rightarrow$  ACCOMECHO + NO2

G45479: KDEC NTLFUO  $\rightarrow$  ACCOMECHO + NO2

G45486b: KDEC C5DIALO  $\rightarrow$  MALDIAL + CO + HO2 and reactions with KRO2HO2.

G45487: KDEC C5DIALO  $\rightarrow$  MALDIAL

G45488: KDEC C5DIALO  $\rightarrow$  MALDIAL

G45489: KDEC C5DIALO  $\rightarrow$  MALDIAL

G45491b: Reactions with KRO2HO2.

G45492: MGLYOX + GLYOX + HO2 from KDEC substitution

G45493: MGLYOX + GLYOX + HO2 from KDEC substitution

G45494: Permutation reaction (minor channels removed).

G46201: Alkyl nitrate formation neglected.

G46404b: Reactions with KRO2HO2 and KDEC C615CO2O  $\rightarrow$  C5DICARB + CO + HO2.

G46405: KDEC C615CO2O  $\rightarrow$  C5DICARB + CO + HO2

G46406: KDEC C615CO2O  $\rightarrow$  C5DICARB + CO + HO2

G46407: Only major channel.

G46413b: Reactions with KRO2HO2 and KDEC NDNPHENO  $\rightarrow$  NC4DCO2H + HNO3 + CO + CO + NO2.

G46414: KDEC NDNPHENO  $\rightarrow$  NC4DCO2H + HNO3 + CO + CO + NO2

G46415: KDEC NDNPHENO  $\rightarrow$  NC4DCO2H + HNO3 + CO + CO + NO2

G46416: KDEC NDNPHENO  $\rightarrow$  NC4DCO2H + HNO3 + CO + CO + NO2

G46418: KDEC CATECOOA  $\rightarrow$  MALDALCO2H + HCOCO2H + HO2 + OH

G46426: KFPAN  $\rightarrow$  k.CH3CO3.NO2

G46430: KDEC GLYOOA  $\rightarrow$  .125 HCHO + .18 GLYOO + .82 HO2 + .57 OH + 1.265 CO

G46432b: Reactions with KRO2HO2 and KDEC NCATECO  $\rightarrow$  NC4DCO2H + HCOCO2H + HO2

G46433: KDEC NCATECO  $\rightarrow$  NC4DCO2H + HCOCO2H + HO2

G46434: KDEC NCATECO  $\rightarrow$  NC4DCO2H + HCOCO2H + HO2

G46435: KDEC NCATECO  $\rightarrow$  NC4DCO2H + HCOCO2H + HO2

G46437b: Reactions with KRO2HO2 and KDEC NPHENO  $\rightarrow$  MALDALCO2H + GLYOX + NO2

G46438: KDEC NPHENO  $\rightarrow$  MALDALCO2H + GLYOX + NO2

G46439: KDEC NPHENO  $\rightarrow$  MALDALCO2H + GLYOX + NO2

G46440: KDEC NPHENO  $\rightarrow$  MALDALCO2H + GLYOX + NO2

G46441: Merged equations.

G46447b: reactions with KRO2HO2 and KDEC NNCATECO  $\rightarrow$  NC4DCO2H + HCOCO2H + NO2

G46448: KDEC NNCATECO  $\rightarrow$  NC4DCO2H + HCOCO2H + NO2

G46449: KDEC NNCATECO  $\rightarrow$  NC4DCO2H + HCOCO2H + NO2

G46450: KDEC NNCATECO  $\rightarrow$  NC4DCO2H + HCOCO2H + NO2

G46457: Merged equations.

G46458: Merged equations.

G46461b: Reactions with KRO2HO2 and KDEC PHENO  $\rightarrow$  .71 MALDALCO2H + .71 GLYOX + .29 PBZQONE + HO2

G46462: KDEC PHENO  $\rightarrow$  .71 MALDALCO<sub>2</sub>H + .71 GLYOX + .29 PBZQONE + HO<sub>2</sub>

G46463: KDEC PHENO  $\rightarrow$  .71 MALDALCO<sub>2</sub>H + .71 GLYOX + .29 PBZQONE + HO<sub>2</sub>

G46464: KDEC PHENO  $\rightarrow$  .71 MALDALCO<sub>2</sub>H + .71 GLYOX + .29 PBZQONE + HO<sub>2</sub> and Only major channel.

G46468: KFPAN  $\rightarrow$  k\_CH<sub>3</sub>CO<sub>3</sub>\_NO<sub>2</sub>

G46472b: new channel

G46476: HOC<sub>6</sub>H<sub>4</sub>NO<sub>2</sub> is a nitro-phenol

G46480b: Reactions with KRO<sub>2</sub>HO<sub>2</sub> and KDEC PBZQO  $\rightarrow$  C<sub>5</sub>CO<sub>2</sub>OHCO<sub>3</sub>

G46481: KDEC PBZQO  $\rightarrow$  C<sub>5</sub>CO<sub>2</sub>OHCO<sub>3</sub>

G46482: KDEC PBZQO  $\rightarrow$  C<sub>5</sub>CO<sub>2</sub>OHCO<sub>3</sub>

G46483: KDEC PBZQO  $\rightarrow$  C<sub>5</sub>CO<sub>2</sub>OHCO<sub>3</sub> and Only major channel.

G46485b: Reactions with KRO<sub>2</sub>HO<sub>2</sub> and KDEC DNPHENO  $\rightarrow$  NC<sub>4</sub>DCO<sub>2</sub>H + HCOCO<sub>2</sub>H + NO<sub>2</sub>

G46486: KDEC DNPHENO  $\rightarrow$  NC<sub>4</sub>DCO<sub>2</sub>H + HCOCO<sub>2</sub>H + NO<sub>2</sub>

G46487: KDEC DNPHENO  $\rightarrow$  NC<sub>4</sub>DCO<sub>2</sub>H + HCOCO<sub>2</sub>H + NO<sub>2</sub>

G46488: KDEC DNPHENO  $\rightarrow$  NC<sub>4</sub>DCO<sub>2</sub>H + HCOCO<sub>2</sub>H + NO<sub>2</sub>

G46490b: Reactions with KRO<sub>2</sub>HO<sub>2</sub> and KDEC BZEMUCO  $\rightarrow$  .5 EPXC<sub>4</sub>DIAL + .5 GLYOX + .5 HO<sub>2</sub> + .5 C<sub>3</sub>DIALO<sub>2</sub> + .5 C<sub>3</sub>OH<sub>13</sub>CO.

G46491b: KDEC BZEMUCO  $\rightarrow$  .5 EPXC<sub>4</sub>DIAL + .5 GLYOX + .5 HO<sub>2</sub> + .5 C<sub>3</sub>DIALO<sub>2</sub> + .5 C<sub>3</sub>OH<sub>13</sub>CO.

G46492: KDEC BZEMUCO  $\rightarrow$  .5 EPXC<sub>4</sub>DIAL + .5 GLYOX + .5 HO<sub>2</sub> + .5 C<sub>3</sub>DIALO<sub>2</sub> + .5 C<sub>3</sub>OH<sub>13</sub>CO

G46493: KDEC BZEMUCO  $\rightarrow$  .5 EPXC<sub>4</sub>DIAL + .5 GLYOX + .5 HO<sub>2</sub> + .5 C<sub>3</sub>DIALO<sub>2</sub> + .5 C<sub>3</sub>OH<sub>13</sub>CO and Only major channel.

G46499b: Reactions with KRO<sub>2</sub>HO<sub>2</sub> and KDEC NBZQO  $\rightarrow$  C<sub>6</sub>CO<sub>4</sub>DB + NO<sub>2</sub>.

G46500: KDEC NBZQO  $\rightarrow$  C<sub>6</sub>CO<sub>4</sub>DB + NO<sub>2</sub>

G46501: KDEC NBZQO  $\rightarrow$  C<sub>6</sub>CO<sub>4</sub>DB + NO<sub>2</sub>

G46502: KDEC NBZQO  $\rightarrow$  C<sub>6</sub>CO<sub>4</sub>DB + NO<sub>2</sub>

G46505b: New channel.

G46515: Only major channel.

G46517b: New channel.

G46522b: In analogy to TLBIPERO<sub>2</sub> from toluene (Birdsall et al., 2010).

G46523b: KDEC BZBIPERO  $\rightarrow$  GLYOX + HO<sub>2</sub> + .5 BZFUONE + .5 BZFUONE

G46524: KDEC BZBIPERO  $\rightarrow$  GLYOX + HO<sub>2</sub> + .5 BZFUONE + .5 BZFUONE

G46525: KDEC BZBIPERO  $\rightarrow$  GLYOX + HO<sub>2</sub> + .5 BZFUONE + .5 BZFUONE and Only major channel.

G47210: Alkyl nitrate formation neglected.

G47214: Alkyl nitrate formation neglected.

G47218: Alkyl nitrate formation neglected.

G47222: Alkyl nitrate formation neglected.

G47223: ROO<sub>6</sub>R<sub>3</sub>OOH produced but no sink for it.

G47225: ROO<sub>6</sub>R<sub>4</sub>P produced but no sink for it.

G47226: ROO<sub>6</sub>R<sub>5</sub>P produced but no sink for it

G47400: Merged.

G47402a: KROPRIM\*O<sub>2</sub> fast reaction C<sub>6</sub>H<sub>5</sub>CH<sub>2</sub>O = BENZAL + HO<sub>2</sub>.

G47402b: KROPRIM\*O<sub>2</sub> fast reaction C<sub>6</sub>H<sub>5</sub>CH<sub>2</sub>O = BENZAL + HO<sub>2</sub>.

G47403: KROPRIM\*O<sub>2</sub> fast reaction C<sub>6</sub>H<sub>5</sub>CH<sub>2</sub>O = BENZAL + HO<sub>2</sub>.

G47404: KROPRIM\*O<sub>2</sub> fast reaction C<sub>6</sub>H<sub>5</sub>CH<sub>2</sub>O = BENZAL + HO<sub>2</sub>. C<sub>6</sub>H<sub>5</sub>CH<sub>2</sub>OH replaced with its oxidation product BENZAL.

G47405: Merged.

G47406: Merged.

G47407b: According to Birdsall et al. (2010), the branching ratio rbipero<sub>2\_oh</sub> is set to 0.40 in order to take into account the OH-recycling and summed yield of butendial and methylbutendial.

G47408a: KDEC TLBIPERO  $\rightarrow$  .6 GLYOX + .4 MGLYOX + HO<sub>2</sub> + .2 ZCODC<sub>23</sub>DBCOD + .2 C<sub>5</sub>DICARB + .2 TLFUONE + .2 BZFUONE + .2 MALDIAL

G47408b: KDEC TLBIPERO  $\rightarrow$  .6 GLYOX + .4 MGLYOX + HO<sub>2</sub> + .2 ZCODC<sub>23</sub>DB COD + .2 C<sub>5</sub>DICARB + .2 TLFUONE + .2 BZFUONE + .2 MALDIAL

G47409: KDEC TLBIPERO  $\rightarrow$  .6 GLYOX + .4 MGLYOX + HO<sub>2</sub> + .2 ZCODC<sub>23</sub>DB COD + .2 C<sub>5</sub>DICARB + .2 TLFUONE + .2 BZFUONE + .2 MALDIAL

G47410: Only major channel and KDEC TLBIPERO  $\rightarrow$  .6 GLYOX + .4 MGLYOX + HO<sub>2</sub> + .2 ZCODC<sub>23</sub>DB COD + .2 C<sub>5</sub>DICARB + .2 TLFUONE + .2 BZFUONE + .2 MALDIAL

G47412: KDEC MGLOOB  $\rightarrow$  .125 CH<sub>3</sub>CHO + .695 CH<sub>3</sub>CO + .57 CO + .57 OH + .125 HO<sub>2</sub> + .18 MGLOO + .25 CO<sub>2</sub>

G47413: Merged.

G47418b: Reactions with KRO<sub>2</sub>HO<sub>2</sub> and KDEC CRESO  $\rightarrow$  .68 C<sub>5</sub>CO<sub>14</sub>OH + .68 GLYOX + HO<sub>2</sub> + .32 PTLQONE.

G47419: KDEC CRESO  $\rightarrow$  .68 C5CO14OH + .68 GLYOX + HO2 + .32 PTLQONE

G47420: KDEC CRESO  $\rightarrow$  .68 C5CO14OH + .68 GLYOX + HO2 + .32 PTLQONE

G47421: KDEC CRESO  $\rightarrow$  .68 C5CO14OH + .68 GLYOX + HO2 + .32 PTLQONE and Only major channel.

G47422b: Reactions with KRO2HO2 and KDEC NCRESO  $\rightarrow$  C5CO14OH + GLYOX + NO2

G47423: KDEC NCRESO  $\rightarrow$  C5CO14OH + GLYOX + NO2

G47424: KDEC NCRESO  $\rightarrow$  C5CO14OH + GLYOX + NO2

G47425: KDEC NCRESO  $\rightarrow$  C5CO14OH + GLYOX + NO2 and Only major channel.

G47426: TOL1OHNO2 is a nitro-phenol

G47429: KDEC MCATECOOA  $\rightarrow$  MC3ODBCO2H + HCOCO2H + HO2 + OH

G47436: KFPAN  $\rightarrow$  k\_CH3CO3\_NO2

G47438: Only major channel.

G47439b: Reactions with KRO2HO2 and KDEC TLEMUCO  $\rightarrow$  .5 C3DIALO2 + .5 CO2H3CHO + .5 EPXC4DIAL + .5 MGLYOX + .5 HO2

G47440b: KDEC TLEMUCO  $\rightarrow$  .5 C3DIALO2 + .5 CO2H3CHO + .5 EPXC4DIAL + .5 MGLYOX + .5 HO2

G47441: KDEC TLEMUCO  $\rightarrow$  .5 C3DIALO2 + .5 CO2H3CHO + .5 EPXC4DIAL + .5 MGLYOX + .5 HO2

G47442: KDEC TLEMUCO  $\rightarrow$  .5 C3DIALO2 + .5 CO2H3CHO + .5 EPXC4DIAL + .5 MGLYOX + .5 HO2 and Only major channel.

G47445: KFPAN  $\rightarrow$  k\_CH3CO3\_NO2

G47447: Only major channel.

G47454: New channel.

G47479: New channel.

G47482b: Reactions with KRO2HO2 and KDEC NPTLQO  $\rightarrow$  C7CO4DB + NO2

G47483: KDEC NPTLQO  $\rightarrow$  C7CO4DB + NO2

G47484: KDEC NPTLQO  $\rightarrow$  C7CO4DB + NO2

G47485: KDEC NPTLQO  $\rightarrow$  C7CO4DB + NO2

G47486b: Reactions with KRO2HO2 and KDEC PTLQO  $\rightarrow$  C6CO2OHCO3

G47487: KDEC PTLQO  $\rightarrow$  C6CO2OHCO3

G47488: KDEC PTLQO  $\rightarrow$  C6CO2OHCO3

G47489: Only major channel. KDEC PTLQO  $\rightarrow$  C6CO2OHCO3.

G47494: New channel.

G47497b: Reactions with KRO2HO2 and KDEC MNCATECO  $\rightarrow$  NC4MDCO2H + HCOCO2H + NO2

G47498: KDEC MNNCATECO  $\rightarrow$  NC4MDCO2H + HCOCO2H + NO2

G47499: KDEC MNNCATECO  $\rightarrow$  NC4MDCO2H + HCOCO2H + NO2

G47501b: Reactions with KRO2HO2 and KDEC MNCATECO  $\rightarrow$  NC4MDCO2H + HCOCO2H + HO2

G47502: KDEC MNCATECO  $\rightarrow$  NC4MDCO2H + HCOCO2H + HO2

G47503: KDEC MNCATECO  $\rightarrow$  NC4MDCO2H + HCOCO2H + HO2

G47504: KDEC MNCATECO  $\rightarrow$  NC4MDCO2H + HCOCO2H + HO2

G47509b: Reactions with KRO2HO2 and KDEC NDNCRESO  $\rightarrow$  NC4MDCO2H + HNO3 + CO + CO + NO2

G47510: KDEC NDNCRESO  $\rightarrow$  NC4MDCO2H + HNO3 + CO + CO + NO2

G47511: KDEC NDNCRESO  $\rightarrow$  NC4MDCO2H + HNO3 + CO + CO + NO2

G47512: KDEC NDNCRESO  $\rightarrow$  NC4MDCO2H + HNO3 + CO + CO + NO2

G47513b: Reactions with KRO2HO2 and KDEC DNCRESO  $\rightarrow$  NC4MDCO2H + HCOCO2H + NO2

G47514: KDEC DNCRESO  $\rightarrow$  NC4MDCO2H + HCOCO2H + NO2

G47515: KDEC DNCRESO  $\rightarrow$  NC4MDCO2H + HCOCO2H + NO2

G47516: KDEC DNCRESO  $\rightarrow$  NC4MDCO2H + HCOCO2H + NO2

G48202: Alkyl nitrate formation neglected.

G48205: Alkyl nitrate formation neglected.

G48210: Alkyl nitrate formation neglected.

G48212: Alkyl nitrate formation neglected.

G48216: Alkyl nitrate formation neglected.

G48222: Alkyl nitrate formation neglected.

G48400a: Same products as for toluene. Assuming a 1:1:1 proportion in xylenes emissions the analogous toluene product is produced with a rate constant equal to  $(1.36\text{E-}11 \cdot 0.24 + 2.31\text{E-}11 \cdot 0.29 + 1.43\text{E-}11 \cdot 0.155)/3$ , where k and coefficients are for the single isomers ortho, meta and para from MCM.

G48400b: Same products as for toluene. Assuming a 1:1:1 proportion in xylenes emissions the analogous toluene product is produced with a rate constant equal to  $(1.36\text{E-}11 \cdot 0.05 + 2.31\text{E-}11 \cdot 0.04 + 1.43\text{E-}11 \cdot 0.10)/3$ , where k and coefficients are for the single isomers ortho, meta and para from MCM.

G48400c: Same products as for toluene. Assuming a 1:1:1 proportion in xylenes emissions the analogous toluene product is produced with a rate constant equal

to  $(1.36\text{E-}11*0.16 + 2.31\text{E-}11*0.17 + 1.43\text{E-}11*0.12)/3$ , where k and coefficients are for the single isomers ortho, meta and para from MCM.

G48400d: Same products as for toluene. Assuming a 1:1:1 proportion in xylenes emissions the analogous toluene product is produced with a rate constant equal to  $(1.36\text{E-}11*0.55 + 2.31\text{E-}11*0.50 + 1.43\text{E-}11*0.625)/3$ , where k and coefficients are for the single isomers ortho, meta and para from MCM.

G48401: Same products as for toluene. The rate constant is the average of m, p, o  $k=(4.10\text{E-}16+2.60\text{E-}16+5.00\text{E-}16)/3 = 3.9\text{E-}16$ .

G48402: merged under same rate constant

G48403: Same products as for toluene

G48405:  $\text{KDEC CH}_2\text{OOb} \rightarrow .24 \text{CH}_2\text{OO} + .40 \text{CO} + .36 \text{HO}_2 + .36 \text{CO} + .36 \text{OH}$  and  $\text{H}_2\text{O}_{\text{subs}} \text{PHCHOO} \rightarrow .625 \text{PHCOOH} + .375 \text{BENZAL} + .375 \text{H}_2\text{O}_2 + .2 \text{CO}_2$

G48408:  $\text{KDEC NSTYRENEO} \rightarrow \text{NO}_2 + \text{HCHO} + \text{BENZAL}$

G48409:  $\text{KDEC NSTYRENEO} \rightarrow \text{NO}_2 + \text{HCHO} + \text{BENZAL}$

G48410:  $\text{KDEC NSTYRENEO} \rightarrow \text{NO}_2 + \text{HCHO} + \text{BENZAL}$

G48412b:  $\text{KDEC STYRENO} \rightarrow \text{HO}_2 + \text{HCHO} + \text{BENZAL}$  and reactions with  $\text{KRO}_2\text{HO}_2$ .

G48413:  $\text{KDEC STYRENO} \rightarrow \text{HO}_2 + \text{HCHO} + \text{BENZAL}$

G48414:  $\text{KDEC STYRENO} \rightarrow \text{HO}_2 + \text{HCHO} + \text{BENZAL}$

G48415:  $\text{KDEC STYRENO} \rightarrow \text{HO}_2 + \text{HCHO} + \text{BENZAL}$

G49207: Alkyl nitrate formation neglected.

G49238: Alkyl nitrate formation neglected.

G49246: Only this channel considered as the intermediate radical is likely more stable than  $\text{CHCH(OH)}_2$ . Instead of the (lacking) carbonyl a product of further degradation is assumed.

G49247: Theoretical keto-enol tautomerization catalyzed by formic acid (Grenfell et al., 2006).

G49248: Theoretical keto-enol tautomerization catalyzed by formic acid (Grenfell et al., 2006).

G49400a: Same products as for toluene. Assuming a 1:1:1 proportion in xylenes emissions the analogous toluene product is produced with a rate constant equal to  $(3.27\text{E-}11*0.21 + 3.25\text{E-}11*0.30 + 5.67\text{E-}11*0.14)/3$ , where k and coefficients are for the single isomers 1,2,3-, 1,3,4- and 1,3,5- from MCM.

G49400b: Same products as for toluene. Assuming a 1:1:1 proportion in xylenes emissions the analogous toluene product is produced with a rate constant equal to  $(3.27\text{E-}11*0.06 + 3.25\text{E-}11*0.06 + 5.67\text{E-}11*0.03)/3$ , where k and coefficients are for the single isomers 1,2,3-, 1,3,4- and 1,3,5- from MCM.

G49400c: Same products as for toluene. Assuming a 1:1:1 proportion in xylenes emissions the analogous toluene product is produced with a rate constant equal to  $(3.27\text{E-}11*0.03 + 3.25\text{E-}11*0.03 + 5.67\text{E-}11*.04)/3$ , where k and coefficients are for the single isomers 1,2,3-, 1,3,4- and 1,3,5- from MCM.

G49400d: Same products as for toluene. Assuming a 1:1:1 proportion in xylenes emissions the analogous toluene product is produced with a rate constant equal to  $(3.27\text{E-}11*0.70 + 3.25\text{E-}11*0.61 + 5.67\text{E-}11*0.79)/3$ , where k and coefficients are for the single isomers 1,2,3-, 1,3,4- and 1,3,5- from MCM.

G49401: Same products as for toluene. The rate constant is the average of m, p, o  $k=(1.90+1.80+0.88)\text{E-}15/3=1.52\text{E-}15$ .

G40200: Products from Vereecken et al. (2007).  $\text{LAP-INABO}_2 = .65 \text{APINAO}_2 + .35 \text{APINBO}_2$

G40203: Weighted average for isomers A and B,  $k = 0.33*9.20\text{E-}14+0.67*8.80\text{E-}13$ .

G40204: Weighted average for isomers A and B,  $k = 0.35*1.83\text{E-}11+0.65*3.28\text{E-}11$ .

G40205: Weighted average for isomers A and B,  $k = 0.35*5.50\text{E-}12+0.65*3.64\text{E-}12$ .

G40206: SAR-estimated rate constant,  $(k_{\text{ads}}+k_{\text{adt}})*\text{acoch}_3 = 6.46\text{E-}11$  where  $k_{\text{ads}} = 3.0\text{E-}11$ ,  $k_{\text{adt}} = 5.5\text{E-}11$ ,  $\text{acoch}_3 = 0.76$

G40207: Alkyl nitrate formation neglected.

G40211: Products from Rickard and Pascoe (2009).

G40212: Products from Rickard and Pascoe (2009).

G40232: Products from Capouet et al. (2008).

G40242: Alkyl nitrate formation neglected.

G40246: Products from Rickard and Pascoe (2009).

G40248: Alkyl nitrate formation neglected.

G40252a: Products from Vereecken and Peeters (2012).

G40252b: Products from Vereecken and Peeters (2012).

G40259:  $\text{ROO}_6\text{R1OOH}$  is produced but no sink for it.

G40262:  $\text{RO}_6\text{R1OOH}$  is produced but no sink for it.

G40266: Rate constant modified according to MCM protocol.

G40267a: Products from Nguyen et al. (2009).

G40268: Products from Rickard and Pascoe (2009).

G40270: Alkyl nitrate neglected.

G40274: As for  $\text{RO}_6\text{R1NO}_3$  in G4085.

G40276: Only this channel considered as the intermediate radical is likely more stable than  $\text{CHCH(OH)}_2$ .

G40277: Theoretical keto-enol tautomerization catalyzed by formic acid (Grenfell et al., 2006).

G40278: Theoretical keto-enol tautomerization catalyzed by formic acid (Grenfell et al., 2006).

G40282a: Products from Vereecken and Peeters (2012).

G40282b: Products from Vereecken and Peeters (2012).

G40283a: Products from Nguyen et al. (2009).

G40284: Products from Rickard and Pascoe (2009).

G40285a: Products from Vereecken and Peeters (2012).

G40285b: Products from Vereecken and Peeters (2012).

G40286a: Products from Nguyen et al. (2009).

G40287: Products from Rickard and Pascoe (2009).

G40400: DIET35TOL(from MCM) as representative of higher aromatics

G40401: Same products as for toluene.

G9400a: For the abstraction path, the assumed reaction sequence (omitting H<sub>2</sub>O and O<sub>2</sub> as products) according to Yin et al. (1990) is:

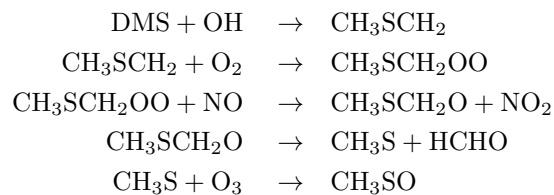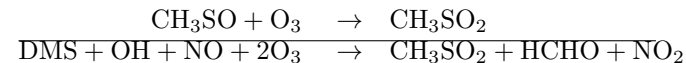

Neglecting the effect on O<sub>3</sub> and NO<sub>x</sub>, the remaining reaction is:

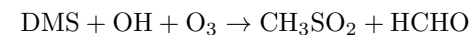

.

G9400b: For the addition path, the rate coefficient is:  $k_{\text{DMS\_OH}} = 1.0\text{E-}39 \cdot \text{EXP}(5820./\text{temp}) \cdot \text{C}(\text{ind\_02}) / (1.+5.0\text{E-}30 \cdot \text{EXP}(6280./\text{temp}) \cdot \text{C}(\text{ind\_02}))$ .

G9408: Average of 3.9E-11 and 3.42E-11.

Table 2: Photolysis reactions

| #       | labels    | reaction                                                                                           | rate coefficient     | reference                                     |
|---------|-----------|----------------------------------------------------------------------------------------------------|----------------------|-----------------------------------------------|
| J1000a  | UpStTrGJ  | $O_2 + h\nu \rightarrow O(^3P) + O(^3P)$                                                           | jx(ip_02)            | Sander et al. (2014)                          |
| J1001a  | UpStTrGJ  | $O_3 + h\nu \rightarrow O(^1D) + O_2$                                                              | jx(ip_01D)           | Sander et al. (2014)                          |
| J1001b  | UpStTrGJ  | $O_3 + h\nu \rightarrow O(^3P) + O_2$                                                              | jx(ip_03P)           | Sander et al. (2014)                          |
| J2101   | UpStTrGJ  | $H_2O_2 + h\nu \rightarrow 2 OH$                                                                   | jx(ip_H202)          | Sander et al. (2014)                          |
| J3101   | UpStTrGJN | $NO_2 + h\nu \rightarrow NO + O(^3P)$                                                              | jx(ip_N02)           | Sander et al. (2014)                          |
| J3103a  | UpStTrGJN | $NO_3 + h\nu \rightarrow NO_2 + O(^3P)$                                                            | jx(ip_N020)          | Sander et al. (2014)                          |
| J3103b  | UpStTrGJN | $NO_3 + h\nu \rightarrow NO + O_2$                                                                 | jx(ip_N002)          | Sander et al. (2014)                          |
| J3104   | StTrGJN   | $N_2O_5 + h\nu \rightarrow NO_2 + NO_3$                                                            | jx(ip_N205)          | Sander et al. (2014)                          |
| J3200   | TrGJN     | $HONO + h\nu \rightarrow NO + OH$                                                                  | jx(ip_HONO)          | Sander et al. (2014)                          |
| J3201   | StTrGJN   | $HNO_3 + h\nu \rightarrow NO_2 + OH$                                                               | jx(ip_HNO3)          | Sander et al. (2014)                          |
| J3202   | StTrGJN   | $HNO_4 + h\nu \rightarrow .667 NO_2 + .667 HO_2 + .333 NO_3 + .333 OH$                             | jx(ip_HNO4)          | Sander et al. (2014)                          |
| J41000  | StTrGJ    | $CH_3OOH + h\nu \rightarrow CH_3O + OH$                                                            | jx(ip_CH300H)        | Sander et al. (2014)                          |
| J41001a | StTrGJ    | $HCHO + h\nu \rightarrow H_2 + CO$                                                                 | jx(ip_COH2)          | Sander et al. (2014)                          |
| J41001b | StTrGJ    | $HCHO + h\nu \rightarrow H + CO + HO_2$                                                            | jx(ip_CHOH)          | Sander et al. (2014)                          |
| J41004  | StTrGJN   | $CH_3ONO + h\nu \rightarrow CH_3O + NO$                                                            | jx(ip_CH3ON0)        | Sander et al. (2014)                          |
| J41005  | StTrGJN   | $CH_3ONO_2 + h\nu \rightarrow CH_3O + NO_2$                                                        | jx(ip_CH3NO3)        | Sander et al. (2014)                          |
| J41006  | StTrGJN   | $CH_3O_2NO_2 + h\nu \rightarrow .667 NO_2 + .667 CH_3O_2 + .333 NO_3 + .333 CH_3O$                 | jx(ip_CH302NO2)      | Sander et al. (2014)*                         |
| J41007  | StTrGJ    | $HOCH_2OOH + h\nu \rightarrow HCOOH + OH + HO_2$                                                   | jx(ip_CH300H)        | Sander et al. (2014)                          |
| J41008  | StTrGJ    | $CH_3O_2 + h\nu \rightarrow HCHO + OH$                                                             | jx(ip_CH302)         | Sander et al. (2014)                          |
| J41009  | StTrGJ    | $HCOOH + h\nu \rightarrow CO + HO_2 + OH$                                                          | jx(ip_HCOOH)         | Sander et al. (2014)                          |
| J41010  | StTrGJN   | $HOCH_2O_2NO_2 + h\nu \rightarrow .667 NO_2 + .667 HOCH_2O_2 + .333 NO_3 + .333 HCOOH + .333 HO_2$ | jx(ip_CH302NO2)      | Sander et al. (2014)                          |
| J42000  | TrGJC     | $C_2H_5OOH + h\nu \rightarrow CH_3CHO + HO_2 + OH$                                                 | jx(ip_CH300H)        | von Kuhlmann (2001)                           |
| J42001a | TrGJC     | $CH_3CHO + h\nu \rightarrow CH_3 + HO_2 + CO$                                                      | jx(ip_CH3CHO)        | Sander et al. (2014)                          |
| J42001b | TrGJC     | $CH_3CHO + h\nu \rightarrow CH_2CHOH$                                                              | jx(ip_CH3CHO2VINY)   | Clubb et al. (2012)                           |
| J42002  | TrGJC     | $CH_3C(O)OOH + h\nu \rightarrow CH_3 + OH + CO_2$                                                  | jx(ip_CH3C03H)       | Sander et al. (2014)                          |
| J42004  | TrGJCN    | $PAN + h\nu \rightarrow .7 CH_3C(O) + .7 NO_2 + .3 CH_3 + .3 CO_2 + .3 NO_3$                       | jx(ip_PAN)           | Sander et al. (2014),<br>Sander et al. (2011) |
| J42005a | TrGJC     | $HOCH_2CHO + h\nu \rightarrow HCHO + 2 HO_2 + CO$                                                  | jx(ip_HOCH2CHO)*0.83 | Sander et al. (2011)                          |
| J42005b | TrGJC     | $HOCH_2CHO + h\nu \rightarrow OH + HCOCH_2O_2$                                                     | jx(ip_HOCH2CHO)*0.07 | Sander et al. (2011)                          |
| J42005c | TrGJC     | $HOCH_2CHO + h\nu \rightarrow CH_3OH + CO$                                                         | jx(ip_HOCH2CHO)*0.10 | Sander et al. (2011)                          |
| J42006  | TrGJC     | $HOCH_2CO_3H + h\nu \rightarrow HCHO + HO_2 + OH + CO_2$                                           | jx(ip_CH300H)        | Rickard and Pascoe (2009)                     |

Table 2: Photolysis reactions (... continued)

| #      | labels   | reaction                                                                                                                                                                                                                     | rate coefficient                                                                                  | reference                      |
|--------|----------|------------------------------------------------------------------------------------------------------------------------------------------------------------------------------------------------------------------------------|---------------------------------------------------------------------------------------------------|--------------------------------|
| J42007 | TrGJCN   | PHAN + $h\nu$ → .7 HOCH <sub>2</sub> CO + .7 NO <sub>2</sub> + .3 HCHO + .3 HO <sub>2</sub><br>+ .3 CO <sub>2</sub> + .3 NO <sub>3</sub>                                                                                     | jx(ip_PAN)                                                                                        | see note*                      |
| J42008 | TrGJC    | GLYOX + $h\nu$ → 2 CO + 2 HO <sub>2</sub>                                                                                                                                                                                    | jx(ip_GLYOX)                                                                                      | Sander et al. (2014)           |
| J42009 | TrGJC    | HCOCO <sub>2</sub> H + $h\nu$ → 2 HO <sub>2</sub> + CO + CO <sub>2</sub>                                                                                                                                                     | jx(ip_MGLYOX)                                                                                     | Rickard and Pascoe (2009)      |
| J42010 | TrGJC    | HCOCO <sub>3</sub> H + $h\nu$ → HO <sub>2</sub> + CO + OH + CO <sub>2</sub>                                                                                                                                                  | jx(ip_CH300H)+jx(ip_HOCH2CHO)                                                                     | Rickard and Pascoe (2009)      |
| J42011 | TrGJC    | HYETHO <sub>2</sub> H + $h\nu$ → HOCH <sub>2</sub> CH <sub>2</sub> O + OH                                                                                                                                                    | jx(ip_CH300H)                                                                                     | Rickard and Pascoe (2009)      |
| J42012 | TrGJCN   | ETHOHNO <sub>3</sub> + $h\nu$ → HO <sub>2</sub> + 2 HCHO + NO <sub>2</sub>                                                                                                                                                   | J_IC3H7N03                                                                                        | Rickard and Pascoe (2009)      |
| J42013 | TrGJC    | HOCH <sub>2</sub> CO <sub>3</sub> H + $h\nu$ → OH + HCHO + CO <sub>2</sub> + OH                                                                                                                                              | 2*jx(ip_CH300H)                                                                                   | Taraborrelli (2016)            |
| J42014 | TrGC     | HOCH <sub>2</sub> CO <sub>2</sub> H + $h\nu$ → OH + HCHO + HO <sub>2</sub> + CO <sub>2</sub>                                                                                                                                 | jx(ip_CH300H)                                                                                     | Taraborrelli (2016)            |
| J42015 | TrGC     | CH <sub>2</sub> CO + $h\nu$ → .4 CO <sub>2</sub> + .8 H + .34 CO + .34 OH + .34 HO <sub>2</sub><br>+ .16 HCHO + .16 O( <sup>3</sup> P) + .1 HCOOH + CO                                                                       | J_ketene* 0.36                                                                                    | Taraborrelli (2016)            |
| J42016 | TrGC     | CH <sub>3</sub> CHOHOOH + $h\nu$ → CH <sub>3</sub> + HCOOH + OH                                                                                                                                                              | jx(ip_CH300H)                                                                                     | Taraborrelli (2016)            |
| J42017 | TrGJCN   | NO <sub>3</sub> CH <sub>2</sub> CHO + $h\nu$ → HO <sub>2</sub> + CO + HCHO + NO <sub>2</sub>                                                                                                                                 | (jx(ip_C2H5N03)+jx(ip_CH3CHO))<br>*(jx(ip_NOA)+1E-10)/(0.59*J_<br>IC3H7N03+jx(ip_CH3COCH3)+1E-10) | Taraborrelli (2016)*           |
| J42018 | TrGJC    | HOCH <sub>2</sub> CHO + $h\nu$ → OH + HCHO + CO + HO <sub>2</sub>                                                                                                                                                            | jx(ip_CH300H)+jx(ip_HOCH2CHO)                                                                     | Taraborrelli (2016)            |
| J42019 | TrGJCN   | C <sub>2</sub> H <sub>5</sub> ONO <sub>2</sub> + $h\nu$ → CH <sub>3</sub> CHO + HO <sub>2</sub> + NO <sub>2</sub>                                                                                                            | jx(ip_C2H5N03)                                                                                    | Taraborrelli (2016)            |
| J42020 | TrGJCN   | NO <sub>3</sub> CH <sub>2</sub> CHO + $h\nu$ → .7 NO <sub>3</sub> CH <sub>2</sub> CO <sub>3</sub> + .7 NO <sub>2</sub> + .3 HCHO +<br>.3 NO <sub>2</sub> + .3 CO <sub>2</sub> + .3 NO <sub>3</sub>                           | jx(ip_PAN)                                                                                        | Taraborrelli (2016)*           |
| J42021 | StTrGJCN | C <sub>2</sub> H <sub>5</sub> O <sub>2</sub> NO <sub>2</sub> + $h\nu$ → .667 NO <sub>2</sub> + .667 C <sub>2</sub> H <sub>5</sub> O <sub>2</sub> + .333 NO <sub>3</sub> +<br>.333 CH <sub>3</sub> CHO + .333 HO <sub>2</sub> | jx(ip_CH302N02)                                                                                   | Taraborrelli (2016)*           |
| J43000 | TrGJC    | iC <sub>3</sub> H <sub>7</sub> OOH + $h\nu$ → CH <sub>3</sub> COCH <sub>3</sub> + HO <sub>2</sub> + OH                                                                                                                       | jx(ip_CH300H)                                                                                     | von Kuhlmann (2001)            |
| J43001 | TrGJC    | CH <sub>3</sub> COCH <sub>3</sub> + $h\nu$ → CH <sub>3</sub> C(O) + CH <sub>3</sub>                                                                                                                                          | jx(ip_CH3COCH3)                                                                                   | Sander et al. (2014)           |
| J43002 | TrGJC    | CH <sub>3</sub> COCH <sub>2</sub> OH + $h\nu$ → .5 CH <sub>3</sub> C(O) + .5 HCHO + .5 HO <sub>2</sub> + .5<br>HOCH <sub>2</sub> CO + .5 CH <sub>3</sub>                                                                     | J_ACETOL                                                                                          | Sander et al. (2011)*          |
| J43003 | TrGJC    | MGLYOX + $h\nu$ → CH <sub>3</sub> C(O) + CO + HO <sub>2</sub>                                                                                                                                                                | jx(ip_MGLYOX)                                                                                     | Sander et al. (2014)           |
| J43004 | TrGJC    | CH <sub>3</sub> COCH <sub>2</sub> O <sub>2</sub> H + $h\nu$ → CH <sub>3</sub> C(O) + HCHO + OH                                                                                                                               | jx(ip_CH300H)+J_ACETOL                                                                            | Rickard and Pascoe (2009)      |
| J43005 | TrGJC    | HOCH <sub>2</sub> COCH <sub>2</sub> OOH + $h\nu$ → HOCH <sub>2</sub> CO + HCHO + OH                                                                                                                                          | jx(ip_CH300H)+J_ACETOL                                                                            | Taraborrelli (2016)            |
| J43006 | TrGJCN   | iC <sub>3</sub> H <sub>7</sub> ONO <sub>2</sub> + $h\nu$ → CH <sub>3</sub> COCH <sub>3</sub> + NO <sub>2</sub> + HO <sub>2</sub>                                                                                             | J_IC3H7N03                                                                                        | von Kuhlmann et al.<br>(2003)* |
| J43007 | TrGJCN   | NOA + $h\nu$ → CH <sub>3</sub> C(O) + HCHO + NO <sub>2</sub>                                                                                                                                                                 | jx(ip_NOA)                                                                                        | Barnes et al. (1993)           |
| J43009 | TrGJC    | HYPROPO <sub>2</sub> H + $h\nu$ → CH <sub>3</sub> CHO + HCHO + HO <sub>2</sub> + OH                                                                                                                                          | jx(ip_CH300H)                                                                                     | Rickard and Pascoe (2009)      |
| J43010 | TrGJCN   | PR <sub>2</sub> O <sub>2</sub> HNO <sub>3</sub> + $h\nu$ → NOA + HO <sub>2</sub> + OH                                                                                                                                        | jx(ip_CH300H)                                                                                     | Rickard and Pascoe (2009)      |
| J43011 | TrGJC    | HOCH <sub>2</sub> COCHO + $h\nu$ → HOCH <sub>2</sub> CO + CO + HO <sub>2</sub>                                                                                                                                               | jx(ip_MGLYOX)                                                                                     | Rickard and Pascoe (2009)      |
| J43012 | TrGJC    | HCOCOCH <sub>2</sub> OOH + $h\nu$ → HCOCO + HCHO + OH                                                                                                                                                                        | jx(ip_CH300H)+J_ACETOL                                                                            | Taraborrelli (2016)            |

Table 2: Photolysis reactions (... continued)

| #       | labels   | reaction                                                                                                                                                                                                                                                                                                                | rate coefficient                                                            | reference                                      |
|---------|----------|-------------------------------------------------------------------------------------------------------------------------------------------------------------------------------------------------------------------------------------------------------------------------------------------------------------------------|-----------------------------------------------------------------------------|------------------------------------------------|
| J43013  | TrGJC    | $\text{HCOCOCH}_2\text{OOH} + h\nu \rightarrow \text{HOOCH}_2\text{CO}_3 + \text{CO} + \text{HO}_2$                                                                                                                                                                                                                     | $\text{jx}(\text{ip\_MGLYOX})$                                              | Taraborrelli (2016)                            |
| J43014  | TrGJTerC | $\text{HCOCH}_2\text{CHO} + h\nu \rightarrow \text{HCOCH}_2\text{O}_2 + \text{HO}_2 + \text{CO}$                                                                                                                                                                                                                        | $\text{jx}(\text{ip\_HOCH}_2\text{CHO}) * 2.$                               | Rickard and Pascoe (2009)                      |
| J43015  | TrGJTerC | $\text{HCOCH}_2\text{CO}_2\text{H} + h\nu \rightarrow \text{HCOCH}_2\text{O}_2 + \text{CO}_2 + \text{HO}_2$                                                                                                                                                                                                             | $\text{jx}(\text{ip\_HOCH}_2\text{CHO})$                                    | Rickard and Pascoe (2009)                      |
| J43016  | TrGJTerC | $\text{HOC}_2\text{H}_4\text{CO}_3\text{H} + h\nu \rightarrow \text{HOCH}_2\text{CH}_2\text{O}_2 + \text{CO}_2 + \text{OH}$                                                                                                                                                                                             | $\text{jx}(\text{ip\_CH300H})$                                              | Rickard and Pascoe (2009)                      |
| J43017  | TrGJC    | $\text{HCOCOCHO} + h\nu \rightarrow \text{HCOCO} + \text{HO}_2 + \text{CO}$                                                                                                                                                                                                                                             | $2 * \text{jx}(\text{ip\_MGLYOX})$                                          | Taraborrelli (2016)                            |
| J43018  | TrGJC    | $\text{CH}_3\text{COCO}_2\text{H} + h\nu \rightarrow .32 \text{CH}_3\text{CHO} + .16 \text{CH}_2\text{CHOH} + .54 \text{CO}_2 + .38 \text{CH}_3\text{C}(\text{O}) + .38 \text{HO}_2 + .38 \text{CO}_2 + .07 \text{CH}_3\text{COOH} + .07 \text{CO} + .05 \text{CH}_3\text{C}(\text{O}) + .05 \text{CO} + .05 \text{OH}$ | $\text{JX}(\text{IP\_CH3COCOC}_2\text{H})$                                  | Sander et al. (2011), Taraborrelli (2016)*     |
| J43019  | TrGC     | $\text{CH}_3\text{COCO}_3\text{H} + h\nu \rightarrow \text{CH}_3\text{C}(\text{O}) + \text{OH} + \text{CO}_2$                                                                                                                                                                                                           | $\text{JX}(\text{IP\_MGLYOX}) + \text{jx}(\text{ip\_CH300H})$               | Taraborrelli (2016)                            |
| J43020  | TrGC     | $\text{CH}_3\text{CHCO} + h\nu \rightarrow \text{C}_2\text{H}_4 + \text{CO}$                                                                                                                                                                                                                                            | $\text{J\_ketene} * 0.36 * 2.$                                              | Taraborrelli (2016)                            |
| J43021  | TrGCN    | $\text{PROPOLNO}_3 + h\nu \rightarrow \text{HOCH}_2\text{CHO} + \text{HCHO} + \text{HO}_2 + \text{NO}_2$                                                                                                                                                                                                                | $\text{J\_IC3H7N03}$                                                        | Taraborrelli (2016)                            |
| J43022  | TrGCN    | $\text{CH}_3\text{COCH}_2\text{OONO}_2 + h\nu \rightarrow \text{CH}_3\text{C}(\text{O}) + \text{HCHO} + \text{NO}_3$                                                                                                                                                                                                    | $\text{jx}(\text{ip\_CH302N02}) + \text{jx}(\text{ip\_CH3COC}_3\text{H})$   | Taraborrelli (2016)                            |
| J43023  | TrGJC    | $\text{C}_3\text{H}_7\text{OOH} + h\nu \rightarrow \text{C}_2\text{H}_5\text{CHO} + \text{HO}_2 + \text{OH}$                                                                                                                                                                                                            | $\text{jx}(\text{ip\_CH300H})$                                              | von Kuhlmann (2001)                            |
| J43024  | TrGJCN   | $\text{C}_3\text{H}_7\text{ONO}_2 + h\nu \rightarrow \text{C}_2\text{H}_5\text{CHO} + \text{NO}_2 + \text{HO}_2$                                                                                                                                                                                                        | $0.59 * \text{J\_IC3H7N03}$                                                 | see note*                                      |
| J43025a | TrGJC    | $\text{C}_2\text{H}_5\text{CHO} + h\nu \rightarrow \text{C}_2\text{H}_5\text{O}_2 + \text{HO}_2 + \text{CO}$                                                                                                                                                                                                            | $\text{jx}(\text{ip\_C}_2\text{H}_5\text{CHO}_2\text{HCO})$                 | see note*                                      |
| J43025b | TrGJC    | $\text{C}_2\text{H}_5\text{CHO} + h\nu \rightarrow \text{CH}_2\text{CHCH}_2\text{OH}$                                                                                                                                                                                                                                   | $\text{jx}(\text{ip\_C}_2\text{H}_5\text{CHO}_2\text{ENOL})$                | Andrews et al. (2012), Taraborrelli (2016)*    |
| J43026  | TrGJCN   | $\text{PPN} + h\nu \rightarrow .7 \text{C}_2\text{H}_5\text{CO}_3 + .7 \text{NO}_2 + .3 \text{C}_2\text{H}_5\text{O}_2 + .3 \text{CO}_2 + .3 \text{NO}_3$                                                                                                                                                               | $\text{jx}(\text{ip\_PAN})$                                                 | Sander et al. (2014), Sander et al. (2011)     |
| J43027  | TrGJC    | $\text{C}_2\text{H}_5\text{CO}_3\text{H} + h\nu \rightarrow \text{C}_2\text{H}_5\text{O}_2 + \text{CO}_2 + \text{OH}$                                                                                                                                                                                                   | $\text{jx}(\text{ip\_CH300H})$                                              | von Kuhlmann (2001)                            |
| J43028a | TrGJC    | $\text{HCOCOCH}_2\text{OOH} + h\nu \rightarrow \text{HOOCH}_2\text{CO}_3 + \text{CO} + \text{HO}_2$                                                                                                                                                                                                                     | $\text{jx}(\text{ip\_MGLYOX})$                                              | Taraborrelli (2016)                            |
| J43028b | TrGJC    | $\text{HCOCOCH}_2\text{OOH} + h\nu \rightarrow \text{HCOCO} + \text{HCHO} + \text{OH}$                                                                                                                                                                                                                                  | $\text{jx}(\text{ip\_HOCH}_2\text{CHO}) + \text{jx}(\text{ip\_CH300H})$     | Taraborrelli (2016)                            |
| J43200  | TrGJTerC | $\text{HCOCH}_2\text{CO}_3\text{H} + h\nu \rightarrow \text{HCOCH}_2\text{O}_2 + \text{CO}_2 + \text{OH}$                                                                                                                                                                                                               | $\text{jx}(\text{ip\_HOCH}_2\text{CHO}) + \text{jx}(\text{ip\_CH300H})$     | Rickard and Pascoe (2009)                      |
| J43400  | TrGJAroC | $\text{C3DIALOOH} + h\nu \rightarrow \text{GLYOX} + \text{CO} + \text{HO}_2 + \text{OH}$                                                                                                                                                                                                                                | $\text{jx}(\text{ip\_HOCH}_2\text{CHO}) * 2 + \text{jx}(\text{ip\_CH300H})$ | Rickard and Pascoe (2009)*                     |
| J43401  | TrGJAroC | $\text{C32OH13CO} + h\nu \rightarrow \text{GLYOX} + \text{HO}_2 + \text{HO}_2 + \text{CO}$                                                                                                                                                                                                                              | $\text{jx}(\text{ip\_HOCH}_2\text{CHO}) * 2$                                | Rickard and Pascoe (2009)                      |
| J43402  | TrGJAroC | $\text{HCOCOHCOC}_3\text{H} + h\nu \rightarrow \text{GLYOX} + \text{HO}_2 + \text{CO}_2 + \text{OH}$                                                                                                                                                                                                                    | $\text{jx}(\text{ip\_CH300H})$                                              | Rickard and Pascoe (2009)                      |
| J44000a | TrGJC    | $\text{LC}_4\text{H}_9\text{OOH} + h\nu \rightarrow \text{OH} + \text{C}_3\text{H}_7\text{CHO} + \text{HO}_2$                                                                                                                                                                                                           | $\text{jx}(\text{ip\_CH300H}) * (\text{k}_p / (\text{k}_p + \text{k}_s))$   | Rickard and Pascoe (2009), Taraborrelli (2016) |
| J44000b | TrGJC    | $\text{LC}_4\text{H}_9\text{OOH} + h\nu \rightarrow \text{OH} + .636 \text{MEK} + .636 \text{HO}_2 + .364 \text{CH}_3\text{CHO} + .364 \text{C}_2\text{H}_5\text{O}_2$                                                                                                                                                  | $\text{jx}(\text{ip\_CH300H}) * (\text{k}_s / (\text{k}_p + \text{k}_s))$   | Rickard and Pascoe (2009), Taraborrelli (2016) |
| J44001  | TrGJC    | $\text{MVK} + h\nu \rightarrow .5 \text{C}_3\text{H}_6 + .5 \text{CH}_3\text{C}(\text{O}) + .5 \text{HCHO} + \text{CO} + .5 \text{HO}_2$                                                                                                                                                                                | $\text{jx}(\text{ip\_MVK})$                                                 | Sander et al. (2014)                           |

Table 2: Photolysis reactions (... continued)

| #       | labels   | reaction                                                                                                                                                                                                                                                                                              | rate coefficient                                                                   | reference                                       |
|---------|----------|-------------------------------------------------------------------------------------------------------------------------------------------------------------------------------------------------------------------------------------------------------------------------------------------------------|------------------------------------------------------------------------------------|-------------------------------------------------|
| J44002  | TrGJC    | MEK + $h\nu \rightarrow \text{CH}_3\text{C}(\text{O}) + \text{C}_2\text{H}_5\text{O}_2$                                                                                                                                                                                                               | $0.42 \cdot \text{jx}(\text{ip\_CHOH})$                                            | von Kuhlmann et al. (2003)                      |
| J44003  | TrGJC    | $\text{LMEKOOH} + h\nu \rightarrow .62 \text{CH}_3\text{C}(\text{O}) + .62 \text{CH}_3\text{CHO} + .38 \text{HCHO} + .38 \text{CO}_2 + .38 \text{HOCH}_2\text{CH}_2\text{O}_2 + \text{OH}$                                                                                                            | $\text{jx}(\text{ip\_CH300H}) + 0.42 \cdot \text{jx}(\text{ip\_CHOH})$             | Taraborrelli (2016)                             |
| J44004  | TrGJC    | $\text{BIACET} + h\nu \rightarrow 2 \text{CH}_3\text{C}(\text{O})$                                                                                                                                                                                                                                    | $2.15 \cdot \text{jx}(\text{ip\_MGLYOX})$                                          | see note*                                       |
| J44005a | TrGJCN   | $\text{LC4H9NO3} + h\nu \rightarrow \text{NO}_2 + \text{C}_3\text{H}_7\text{CHO} + \text{HO}_2$                                                                                                                                                                                                       | $\text{J\_IC3H7N03} \cdot (\text{k\_p} / (\text{k\_p} + \text{k\_s}))$             | see note*                                       |
| J44005b | TrGJCN   | $\text{LC4H9NO3} + h\nu \rightarrow \text{NO}_2 + \text{MEK} + \text{HO}_2$                                                                                                                                                                                                                           | $\text{J\_IC3H7N03} \cdot (\text{k\_s} / (\text{k\_p} + \text{k\_s}))$             | see note*                                       |
| J44006  | TrGJCN   | $\text{MPAN} + h\nu \rightarrow .7 \text{MACO3} + .7 \text{NO}_2 + .3 \text{MACO2} + .3 \text{NO}_3$                                                                                                                                                                                                  | $\text{jx}(\text{ip\_PAN})$                                                        | see note*                                       |
| J44007a | TrGJC    | $\text{CO2H3CO3H} + h\nu \rightarrow \text{MGLYOX} + \text{HO}_2 + \text{OH} + \text{CO}_2$                                                                                                                                                                                                           | $\text{jx}(\text{ip\_CH300H})$                                                     | Rickard and Pascoe (2009)                       |
| J44007b | TrGJC    | $\text{CO2H3CO3H} + h\nu \rightarrow \text{CH}_3\text{C}(\text{O}) + \text{HO}_2 + \text{HCOCO}_3\text{H}$                                                                                                                                                                                            | $\text{J\_ACETOL}$                                                                 | Rickard and Pascoe (2009)                       |
| J44008  | TrGJC    | $\text{MACR} + h\nu \rightarrow .5 \text{MACO3} + .5 \text{CH}_3\text{C}(\text{O}) + .5 \text{HCHO} + .5 \text{CO} + \text{HO}_2$                                                                                                                                                                     | $\text{jx}(\text{ip\_MACR})$                                                       | Sander et al. (2014)                            |
| J44009  | TrGJC    | $\text{MACROOH} + h\nu \rightarrow \text{MACRO} + \text{OH}$                                                                                                                                                                                                                                          | $\text{jx}(\text{ip\_CH300H}) + 2.77 \cdot \text{jx}(\text{ip\_HOCH2CHO})$         | Taraborrelli (2016)*                            |
| J44010  | TrGJC    | $\text{MACROH} + h\nu \rightarrow \text{CH}_3\text{COCH}_2\text{OH} + \text{CO} + \text{HO}_2 + \text{HO}_2$                                                                                                                                                                                          | $2.77 \cdot \text{jx}(\text{ip\_HOCH2CHO})$                                        | see note*                                       |
| J44011  | TrGJC    | $\text{MACO3H} + h\nu \rightarrow \text{MACO2} + \text{OH}$                                                                                                                                                                                                                                           | $\text{jx}(\text{ip\_CH300H})$                                                     | Taraborrelli (2016)                             |
| J44012  | TrGJC    | $\text{LHMVKABOOH} + h\nu \rightarrow .12 \text{MGLYOX} + .12 \text{HO}_2 + .88 \text{CH}_3\text{C}(\text{O}) + .88 \text{HOCH}_2\text{CHO} + .12 \text{HCHO} + \text{OH}$                                                                                                                            | $\text{jx}(\text{ip\_CH300H}) + \text{J\_ACETOL}$                                  | Taraborrelli (2016)                             |
| J44013  | TrGJC    | $\text{CO2H3CHO} + h\nu \rightarrow \text{MGLYOX} + \text{CO} + \text{HO}_2 + \text{HO}_2$                                                                                                                                                                                                            | $\text{jx}(\text{ip\_HOCH2CHO}) + \text{J\_ACETOL}$                                | Taraborrelli (2016)                             |
| J44014  | TrGJC    | $\text{HO12CO3C4} + h\nu \rightarrow \text{CH}_3\text{C}(\text{O}) + \text{HOCH}_2\text{CHO} + \text{HO}_2$                                                                                                                                                                                           | $\text{J\_ACETOL}$                                                                 | Rickard and Pascoe (2009)                       |
| J44015  | TrGJC    | $\text{BIACETOH} + h\nu \rightarrow \text{CH}_3\text{C}(\text{O}) + \text{HOCH}_2\text{CO}$                                                                                                                                                                                                           | $2.15 \cdot \text{jx}(\text{ip\_MGLYOX})$                                          | see note*                                       |
| J44016  | TrGC     | $\text{HCOCCH}_3\text{CO} + h\nu \rightarrow .5 \text{OH} + .5 \text{CH}_3\text{CHO} + \text{CO} + .5 \text{CH}_3\text{CHCO} + .5 \text{CO}$                                                                                                                                                          | $\text{J\_KETENE}$                                                                 | Taraborrelli (2016)                             |
| J44017a | TrGC     | $\text{CH}_3\text{COCHCO} + h\nu \rightarrow .0192 \text{CH}_3\text{COCO}_2\text{H} + .1848 \text{H}_2\text{O}_2 + .2208 \text{MGLYOX} + .36 \text{OH} + .36 \text{CO} + .56 \text{CH}_3\text{C}(\text{O}) + .2 \text{CH}_3\text{CHO} + .2 \text{CO}_2 + .2 \text{HCHO} + .2 \text{HO}_2 + \text{CO}$ | $\text{J\_KETENE} \cdot 0.5$                                                       | Taraborrelli (2016), Rickard and Pascoe (2009)* |
| J44017b | TrGC     | $\text{CH}_3\text{COCHCO} + h\nu \rightarrow \text{CH}_3\text{CHCO} + \text{CO}$                                                                                                                                                                                                                      | $\text{J\_KETENE} \cdot 0.5$                                                       | Taraborrelli (2016)                             |
| J44018a | TrGJC    | $\text{CH}_3\text{COCOCHO} + h\nu \rightarrow \text{CH}_3\text{C}(\text{O}) + 2 \text{CO} + \text{HO}_2$                                                                                                                                                                                              | $\text{jx}(\text{ip\_MGLYOX})$                                                     | Taraborrelli (2016)                             |
| J44018b | TrGJC    | $\text{CH}_3\text{COCOCHO} + h\nu \rightarrow \text{HCOCO} + \text{CH}_3\text{C}(\text{O})$                                                                                                                                                                                                           | $2.15 \cdot \text{jx}(\text{ip\_MGLYOX})$                                          | Taraborrelli (2016)                             |
| J44019  | TrGJC    | $\text{CH}_3\text{COCOCO}_2\text{H} + h\nu \rightarrow \text{CH}_3\text{C}(\text{O}) + \text{CO} + \text{CO}_2 + \text{HO}_2$                                                                                                                                                                         | $3.15 \cdot \text{jx}(\text{ip\_MGLYOX})$                                          | Taraborrelli (2016)                             |
| J44020a | TrGJTerC | $\text{CH}_3\text{COCOCH}_2\text{OOH} + h\nu \rightarrow \text{CH}_3\text{C}(\text{O}) + \text{OH} + \text{HCHO} + \text{CO}$                                                                                                                                                                         | $\text{jx}(\text{ip\_CH300H}) + \text{J\_ACETOL}$                                  | Rickard and Pascoe (2009)                       |
| J44020b | TrGJTerC | $\text{CH}_3\text{COCOCH}_2\text{OOH} + h\nu \rightarrow \text{CH}_3\text{C}(\text{O}) + \text{HCOCO}$                                                                                                                                                                                                | $2.15 \cdot \text{jx}(\text{ip\_MGLYOX})$                                          | Rickard and Pascoe (2009)                       |
| J44021  | TrGJTerC | $\text{C44OOH} + h\nu \rightarrow \text{HCOCH}_2\text{CHO} + \text{CO}_2 + \text{HO}_2 + \text{OH}$                                                                                                                                                                                                   | $\text{jx}(\text{ip\_CH300H})$                                                     | Rickard and Pascoe (2009)                       |
| J44022  | TrGJTerC | $\text{C413COOOH} + h\nu \rightarrow \text{HCOCH}_2\text{CO}_3 + \text{HCHO} + \text{OH}$                                                                                                                                                                                                             | $\text{jx}(\text{ip\_CH300H}) + \text{jx}(\text{ip\_HOCH2CHO}) + \text{J\_ACETOL}$ | Rickard and Pascoe (2009)                       |

Table 2: Photolysis reactions (... continued)

| #       | labels   | reaction                                                                                                                                                                                           | rate coefficient                                                                                                                                                                                         | reference                                                                                           |
|---------|----------|----------------------------------------------------------------------------------------------------------------------------------------------------------------------------------------------------|----------------------------------------------------------------------------------------------------------------------------------------------------------------------------------------------------------|-----------------------------------------------------------------------------------------------------|
| J44023a | TrGJTerC | $\text{C4CODIAL} + h\nu \rightarrow \text{HCOCOCH}_2\text{O}_2 + \text{HO}_2 + \text{CO}$                                                                                                          | $\text{jx}(\text{ip\_HOCH}_2\text{CHO})$                                                                                                                                                                 | Rickard and Pascoe (2009)                                                                           |
| J44023b | TrGJTerC | $\text{C4CODIAL} + h\nu \rightarrow \text{HCOCH}_2\text{CO}_3 + \text{HO}_2 + \text{CO}$                                                                                                           | $\text{jx}(\text{ip\_MGLYOX})$                                                                                                                                                                           | Rickard and Pascoe (2009)                                                                           |
| J44024  | TrGJTerC | $\text{C312COCO}_3\text{H} + h\nu \rightarrow \text{HCOCOCH}_2\text{O}_2 + \text{CO}_2 + \text{OH}$                                                                                                | $\text{jx}(\text{ip\_CH300H}) + \text{jx}(\text{ip\_MGLYOX})$                                                                                                                                            | Rickard and Pascoe (2009)                                                                           |
| J44025  | TrGJCN   | $\text{LMEKNO}_3 + h\nu \rightarrow .62 \text{CH}_3\text{C}(\text{O}) + .62 \text{CH}_3\text{CHO} + .38 \text{HCHO}$<br>$+ .38 \text{CO}_2 + .38 \text{HOCH}_2\text{CH}_2\text{O}_2 + \text{NO}_2$ | $\text{jx}(\text{ip\_MEKN03})$                                                                                                                                                                           | Barnes et al. (1993),<br>Taraborrelli (2016)*                                                       |
| J44026  | TrGJCN   | $\text{MVKNO}_3 + h\nu \rightarrow \text{CH}_3\text{C}(\text{O}) + \text{HOCH}_2\text{CHO} + \text{NO}_2$                                                                                          | $\text{jx}(\text{ip\_MEKN03})$                                                                                                                                                                           | Barnes et al. (1993),<br>Taraborrelli (2016)*                                                       |
| J44027  | TrGJCN   | $\text{MACRN} + h\nu \rightarrow \text{CH}_3\text{COCH}_2\text{OH} + \text{CO} + \text{HO}_2 + \text{NO}_2$                                                                                        | $(2.84 * \text{J\_IC3H7N03} + \text{jx}(\text{ip\_CH3CHO}))$<br>$* (\text{jx}(\text{ip\_MEKN03}) + 1\text{E-10}) / (\text{J\_}$<br>$\text{IC3H7N03} + 0.42 * \text{jx}(\text{ip\_CHOH}) + 1\text{E-10})$ | Müller et al. (2014),<br>Taraborrelli (2016)*                                                       |
| J44028  | TrGJCN   | $\text{TC4H9NO}_3 + h\nu \rightarrow \text{CH}_3\text{COCH}_3 + \text{CH}_3 + \text{NO}_2$                                                                                                         | $2.84 * \text{J\_IC3H7N03}$                                                                                                                                                                              | Taraborrelli (2016)                                                                                 |
| J44029  | TrGJC    | $\text{TC}_4\text{H}_9\text{OOH} + h\nu \rightarrow \text{CH}_3\text{COCH}_3 + \text{CH}_3 + \text{OH}$                                                                                            | $\text{jx}(\text{ip\_CH300H})$                                                                                                                                                                           | Taraborrelli (2016)                                                                                 |
| J44030  | TrGJCN   | $\text{IBUTOLBNO}_3 + h\nu \rightarrow \text{CH}_3\text{COCH}_3 + \text{HCHO} + \text{HO}_2 + \text{NO}_2$                                                                                         | $2.84 * \text{J\_IC3H7N03}$                                                                                                                                                                              | Taraborrelli (2016)                                                                                 |
| J44031  | TrGJC    | $\text{IBUTOLBOOH} + h\nu \rightarrow \text{CH}_3\text{COCH}_3 + \text{HCHO} + \text{HO}_2 + \text{OH}$                                                                                            | $\text{jx}(\text{ip\_CH300H})$                                                                                                                                                                           | Taraborrelli (2016)                                                                                 |
| J44032  | TrGJC    | $\text{LBUT1ENOOH} + h\nu \rightarrow \text{C}_2\text{H}_5\text{CHO} + \text{HCHO} + \text{HO}_2 + \text{OH}$                                                                                      | $\text{jx}(\text{ip\_CH300H})$                                                                                                                                                                           | Taraborrelli (2016)                                                                                 |
| J44033  | TrGJCN   | $\text{LBUT1ENNO}_3 + h\nu \rightarrow \text{C}_2\text{H}_5\text{CHO} + \text{HCHO} + \text{HO}_2 + \text{NO}_2$                                                                                   | $\text{J\_IC3H7N03}$                                                                                                                                                                                     | Taraborrelli (2016)                                                                                 |
| J44034  | TrGJC    | $\text{BUT2OLOOH} + h\nu \rightarrow 2 \text{CH}_3\text{CHO} + \text{HO}_2 + \text{OH}$                                                                                                            | $\text{jx}(\text{ip\_CH300H})$                                                                                                                                                                           | Taraborrelli (2016)                                                                                 |
| J44035  | TrGJCN   | $\text{BUT2OLNO}_3 + h\nu \rightarrow 2 \text{CH}_3\text{CHO} + \text{HO}_2 + \text{NO}_2$                                                                                                         | $\text{J\_IC3H7N03}$                                                                                                                                                                                     | Taraborrelli (2016)                                                                                 |
| J44036  | TrGJC    | $\text{BUT2OLO} + h\nu \rightarrow \text{CH}_3\text{C}(\text{O}) + \text{HOCH}_2\text{CO}$                                                                                                         | $\text{J\_ACETOL}$                                                                                                                                                                                       | Taraborrelli (2016)                                                                                 |
| J44037a | TrGJC    | $\text{C}_3\text{H}_7\text{CHO} + h\nu \rightarrow \text{C}_3\text{H}_7\text{O}_2 + \text{CO} + \text{HO}_2$                                                                                       | $\text{jx}(\text{ip\_C3H7CHO2HCO})$                                                                                                                                                                      | Taraborrelli (2016)                                                                                 |
| J44037b | TrGJC    | $\text{C}_3\text{H}_7\text{CHO} + h\nu \rightarrow \text{C}_2\text{H}_4 + \text{CH}_2\text{CHOH}$                                                                                                  | $\text{jx}(\text{ip\_C3H7CHO2VINY})$                                                                                                                                                                     | Taraborrelli (2016)*                                                                                |
| J44038  | TrGJC    | $\text{IPRCHO} + h\nu \rightarrow \text{iC}_3\text{H}_7\text{O}_2 + \text{CO} + \text{HO}_2$                                                                                                       | $\text{jx}(\text{ip\_IPRCHO2HCO})$                                                                                                                                                                       | Taraborrelli (2016)                                                                                 |
| J44039  | TrGJCN   | $\text{IC4H9NO}_3 + h\nu \rightarrow \text{IPRCHO} + \text{NO}_2$                                                                                                                                  | $\text{J\_IC3H7N03}$                                                                                                                                                                                     | Taraborrelli (2016)                                                                                 |
| J44040  | TrGJC    | $\text{IC}_4\text{H}_9\text{OOH} + h\nu \rightarrow \text{IPRCHO} + \text{HO}_2 + \text{OH}$                                                                                                       | $\text{jx}(\text{ip\_CH300H})$                                                                                                                                                                           | Taraborrelli (2016)                                                                                 |
| J44041  | TrGJC    | $\text{PERIBUACID} + h\nu \rightarrow \text{iC}_3\text{H}_7\text{O}_2 + \text{CO}_2 + \text{OH}$                                                                                                   | $\text{jx}(\text{ip\_CH300H})$                                                                                                                                                                           | Taraborrelli (2016)                                                                                 |
| J44042  | TrGJCN   | $\text{PIPN} + h\nu \rightarrow .7 \text{IPRCO}_3 + .7 \text{NO}_2 + .3 \text{iC}_3\text{H}_7\text{O}_2 + .3 \text{CO}_2 +$<br>$.3 \text{NO}_3$                                                    | $\text{jx}(\text{ip\_PAN})$                                                                                                                                                                              | Taraborrelli (2016),<br>Sander et al. (2014),<br>Sander et al. (2011)                               |
| J44043  | TrGJC    | $\text{HVMK} + h\nu \rightarrow \text{MGLYOX} + \text{CO} + 2 \text{OH}$                                                                                                                           | $\text{jx}(\text{ip\_PeDIONE24})$                                                                                                                                                                        | Taraborrelli (2016),<br>Nakanishi et al. (1977),<br>Messaadia et al. (2015),<br>Yoon et al. (1999)* |

Table 2: Photolysis reactions (... continued)

| #       | labels    | reaction                                                                                                                                         | rate coefficient                                                           | reference                                                                                           |
|---------|-----------|--------------------------------------------------------------------------------------------------------------------------------------------------|----------------------------------------------------------------------------|-----------------------------------------------------------------------------------------------------|
| J44044  | TrGJC     | $\text{HMAC} + h\nu \rightarrow \text{HCOCCH}_3\text{CO} + 2 \text{ OH}$                                                                         | $\text{jx}(\text{ip\_PeDIONE24})$                                          | Taraborrelli (2016),<br>Nakanishi et al. (1977),<br>Messaadia et al. (2015),<br>Yoon et al. (1999)* |
| J44045a | TrGJC     | $\text{CO}_2\text{C}_3\text{CHO} + h\nu \rightarrow \text{CH}_3\text{COCH}_2\text{O}_2 + \text{HO}_2 + \text{CO}$                                | $\text{jx}(\text{ip\_C}_2\text{H}_5\text{CHO}_2\text{HCO})$                | Rickard and Pascoe (2009)                                                                           |
| J44045b | TrGJC     | $\text{CO}_2\text{C}_3\text{CHO} + h\nu \rightarrow \text{HVMK}$                                                                                 | $\text{jx}(\text{ip\_C}_2\text{H}_5\text{CHO}_2\text{ENOL})$               | Andrews et al. (2012),<br>Taraborrelli (2016)                                                       |
| J44046a | TrGJC     | $\text{IBUTDIAL} + h\nu \rightarrow \text{CH}_3\text{CHO} + \text{CO} + \text{HO}_2 + \text{CO}_2 + \text{H}_2\text{O}$                          | $\text{jx}(\text{ip\_C}_2\text{H}_5\text{CHO}_2\text{HCO})*2.$             | see note*                                                                                           |
| J44046b | TrGJC     | $\text{IBUTDIAL} + h\nu \rightarrow \text{HMAC}$                                                                                                 | $\text{jx}(\text{ip\_C}_2\text{H}_5\text{CHO}_2\text{ENOL})*2.$            | Andrews et al. (2012),<br>Taraborrelli (2016)                                                       |
| J44200  | TrGJTerC  | $\text{IBUTALOH} + h\nu \rightarrow \text{CH}_3\text{COCH}_3 + \text{HO}_2 + \text{HO}_2 + \text{CO}$                                            | $\text{J\_ACETOL}$                                                         | Rickard and Pascoe (2009)                                                                           |
| J44201  | TrGJTerC  | $\text{IPRHOCO}_3\text{H} + h\nu \rightarrow \text{CH}_3\text{COCH}_3 + \text{HO}_2 + \text{CO}_2 + \text{OH}$                                   | $\text{jx}(\text{ip\_CH300H})$                                             | Rickard and Pascoe (2009)                                                                           |
| J44400a | TrGJAroC  | $\text{MALDIALOOH} + h\nu \rightarrow \text{C}_3\text{O}_2\text{H}_3\text{CO} + \text{CO} + \text{OH} + \text{HO}_2$                             | $\text{jx}(\text{ip\_HOCH}_2\text{CHO})*2$                                 | Rickard and Pascoe (2009)                                                                           |
| J44400b | TrGJAroC  | $\text{MALDIALOOH} + h\nu \rightarrow \text{GLYOX} + \text{GLYOX} + \text{HO}_2 + \text{OH}$                                                     | $\text{jx}(\text{ip\_CH300H})$                                             | Rickard and Pascoe (2009)*                                                                          |
| J44401  | TrGJAroC  | $\text{BZFUOOH} + h\nu \rightarrow \text{CO}_2\text{C}_3\text{CHO} + \text{HO}_2 + \text{OH}$                                                    | $\text{jx}(\text{ip\_CH300H})$                                             | Rickard and Pascoe (2009)*                                                                          |
| J44402  | TrGJAroC  | $\text{HOCOC}_4\text{DIAL} + h\nu \rightarrow \text{HCOCOHCO}_3 + \text{HO}_2 + \text{CO}$                                                       | $\text{jx}(\text{ip\_MGLYOX})+\text{jx}(\text{ip\_HOCH}_2\text{CHO})$      | Rickard and Pascoe (2009)                                                                           |
| J44403  | TrGJAroCN | $\text{NBZFUOOH} + h\nu \rightarrow .5 \text{ CO}_2\text{C}_3\text{CHO} + .5 \text{ NO}_2 + .5 \text{ NBZFUONE} + .5 \text{ HO}_2 + \text{OH}$   | $\text{jx}(\text{ip\_CH300H})$                                             | Rickard and Pascoe (2009)*                                                                          |
| J44404a | TrGJAroC  | $\text{MALDALCO}_3\text{H} + h\nu \rightarrow \text{HCOCO}_3\text{H} + \text{HO}_2 + \text{CO} + \text{HO}_2 + \text{CO}$                        | $\text{jx}(\text{ip\_MACR})$                                               | Rickard and Pascoe (2009)                                                                           |
| J44404b | TrGJAroC  | $\text{MALDALCO}_3\text{H} + h\nu \rightarrow .6 \text{ MALANHY} + \text{HO}_2 + .4 \text{ GLYOX} + .4 \text{ CO} + .4 \text{ CO}_2 + \text{OH}$ | $\text{jx}(\text{ip\_CH300H})$                                             | Rickard and Pascoe (2009)*                                                                          |
| J44405  | TrGJAroC  | $\text{EPXDLCO}_2\text{H} + h\nu \rightarrow \text{C}_3\text{DIALO}_2 + \text{CO}_2 + \text{HO}_2$                                               | $2.77*\text{jx}(\text{ip\_HOCH}_2\text{CHO})$                              | Rickard and Pascoe (2009)                                                                           |
| J44406  | TrGJAroC  | $\text{MALDIAL} + h\nu \rightarrow .4 \text{ BZFUONE} + .6 \text{ MALDIALCO}_3 + .6 \text{ HO}_2$                                                | $\text{jx}(\text{ip\_NO}_2)*0.14$                                          | Rickard and Pascoe (2009)                                                                           |
| J44407  | TrGJAroC  | $\text{MALANHYOOH} + h\nu \rightarrow \text{HCOCOHCO}_3 + \text{CO}_2 + \text{OH}$                                                               | $\text{jx}(\text{ip\_CH300H})$                                             | Rickard and Pascoe (2009)*                                                                          |
| J44408  | TrGJAroC  | $\text{EPXDLCO}_3\text{H} + h\nu \rightarrow \text{C}_3\text{DIALO}_2 + \text{OH} + \text{CO}_2$                                                 | $\text{jx}(\text{ip\_CH300H})+2.77*\text{jx}(\text{ip\_HOCH}_2\text{CHO})$ | Rickard and Pascoe (2009)                                                                           |
| J44409  | TrGJAroC  | $\text{CO}_2\text{C}_4\text{DIAL} + h\nu \rightarrow \text{CO} + \text{CO} + \text{HO}_2 + \text{HO}_2 + \text{CO} + \text{CO}$                  | $\text{jx}(\text{ip\_MGLYOX})*2$                                           | Rickard and Pascoe (2009)                                                                           |
| J44410  | TrGJAroC  | $\text{MALDALCO}_2\text{H} + h\nu \rightarrow \text{HCOCO}_2\text{H} + \text{HO}_2 + \text{CO} + \text{HO}_2 + \text{CO}$                        | $\text{jx}(\text{ip\_MACR})$                                               | Rickard and Pascoe (2009)                                                                           |
| J44411  | TrGJAroC  | $\text{EPXC}_4\text{DIAL} + h\nu \rightarrow \text{C}_3\text{DIALO}_2 + \text{CO} + \text{HO}_2$                                                 | $2.77*\text{jx}(\text{ip\_HOCH}_2\text{CHO})*2$                            | Rickard and Pascoe (2009)                                                                           |
| J44412  | TrGJAroC  | $\text{CO}_2\text{C}_3\text{CHO} + h\nu \rightarrow \text{HO}_2 + \text{CO} + \text{HCOCH}_2\text{O}_2 + \text{CO}_2$                            | $\text{jx}(\text{ip\_MGLYOX})$                                             | Rickard and Pascoe (2009)                                                                           |
| J44414  | TrGJAroC  | $\text{MECOACEOOH} + h\nu \rightarrow \text{CH}_3\text{C}(\text{O}) + \text{HCHO} + \text{CO}_2 + \text{OH}$                                     | $\text{jx}(\text{ip\_CH300H})$                                             | Rickard and Pascoe (2009)*                                                                          |

Table 2: Photolysis reactions (... continued)

| #       | labels    | reaction                                                                                                                                       | rate coefficient                                                                           | reference                                          |
|---------|-----------|------------------------------------------------------------------------------------------------------------------------------------------------|--------------------------------------------------------------------------------------------|----------------------------------------------------|
| J45002  | TrGJC     | LISOPACOOH + $h\nu$ → LISOPACO + OH                                                                                                            | jx(ip_CH300H)                                                                              | Rickard and Pascoe (2009)                          |
| J45003  | TrGJCN    | LISOPACNO3 + $h\nu$ → LISOPACO + NO <sub>2</sub>                                                                                               | 0.59*J_IC3H7N03                                                                            | see note*                                          |
| J45004  | TrGJC     | ISOPBOOH + $h\nu$ → MVK + HCHO + HO <sub>2</sub> + OH                                                                                          | jx(ip_CH300H)                                                                              | Rickard and Pascoe (2009)                          |
| J45005  | TrGJCN    | ISOPBNO3 + $h\nu$ → MVK + HCHO + HO <sub>2</sub> + NO <sub>2</sub>                                                                             | 2.84*J_IC3H7N03                                                                            | see note*                                          |
| J45006  | TrGJC     | ISOPDOOH + $h\nu$ → MACR + HCHO + HO <sub>2</sub> + OH                                                                                         | jx(ip_CH300H)                                                                              | Rickard and Pascoe (2009)                          |
| J45007  | TrGJCN    | ISOPDNO3 + $h\nu$ → MACR + HCHO + HO <sub>2</sub> + NO <sub>2</sub>                                                                            | J_IC3H7N03                                                                                 | see note*                                          |
| J45008  | TrGJCN    | NISOPOOH + $h\nu$ → NC4CHO + HO <sub>2</sub> + OH                                                                                              | jx(ip_CH300H)                                                                              | Rickard and Pascoe (2009)                          |
| J45009  | TrGJCN    | NC4CHO + $h\nu$ → LHC4ACCO3 + NO <sub>2</sub>                                                                                                  | (.59*J_IC3H7N03+jx(ip_MACR))<br>*(jx(ip_MEKN03)+1E-10)/(J_IC3H7N03+0.42*jx(ip_CHOH)+1E-10) | Müller et al. (2014),<br>Taraborrelli (2016)*      |
| J45010  | TrGJCN    | LNISOOH + $h\nu$ → NOA + OH + .5 HOCHCHO + .5 CO + .5 HO <sub>2</sub> + .5 CO <sub>2</sub>                                                     | jx(ip_CH300H)                                                                              | Taraborrelli et al. (2009),<br>Taraborrelli (2016) |
| J45011  | TrGJC     | LHC4ACCHO + $h\nu$ → .5 LHC4ACCO3 + .5 HO <sub>2</sub> + .5 CO + .5 OH + .25 MACRO2 + .25 LHMVKABO2                                            | jx(ip_MACR)                                                                                | Taraborrelli (2016)                                |
| J45012  | TrGJC     | LC578OOH + $h\nu$ → .25 CH <sub>3</sub> COCH <sub>2</sub> OH + .75 MGLYOX + .25 HOCHCHO + .75 HOCH <sub>2</sub> CHO + .75 HO <sub>2</sub> + OH | jx(ip_CH300H)+ 2.77*jx(ip_HOCH2CHO)                                                        | Taraborrelli (2016)                                |
| J45013  | TrGJC     | LHC4ACCO3H + $h\nu$ → OH + .5 MACRO2 + .5 LHMVKABO2 + OH + CO <sub>2</sub>                                                                     | J_HPALD                                                                                    | Taraborrelli (2016)                                |
| J45014  | TrGJCN    | LC5PAN1719 + $h\nu$ → .7 LHC4ACCO3 + .7 NO <sub>2</sub> + .15 MACRO2 + .15 LHMVKABO2 + .3 CO <sub>2</sub> + .3 NO <sub>3</sub>                 | jx(ip_PAN)                                                                                 | Taraborrelli (2016)                                |
| J45015  | TrGJC     | HCOC5 + $h\nu$ → .65 CH <sub>3</sub> + .65 CO + .65 HCHO + .35 OH + .35 CH <sub>3</sub> COCH <sub>2</sub> O <sub>2</sub> + HOCH2CO             | 0.5*jx(ip_MVK)                                                                             | Taraborrelli (2016)*                               |
| J45016  | TrGJC     | C59OOH + $h\nu$ → CH <sub>3</sub> COCH <sub>2</sub> OH + HOCH2CO + OH                                                                          | J_ACETOL+jx(ip_CH300H)                                                                     | Taraborrelli (2016)                                |
| J45017  | TrGJTerC  | C511OOH + $h\nu$ → CH <sub>3</sub> C(O) + HCOCH2CHO + OH                                                                                       | jx(ip_CH300H)+jx(ip_HOCH2CHO)                                                              | Rickard and Pascoe (2009)                          |
| J45018a | TrGJTerC  | CO23C4CHO + $h\nu$ → CH <sub>3</sub> COCOCH <sub>2</sub> O <sub>2</sub> + HO <sub>2</sub> + CO                                                 | jx(ip_HOCH2CHO)                                                                            | Rickard and Pascoe (2009)                          |
| J45018b | TrGJTerC  | CO23C4CHO + $h\nu$ → CH <sub>3</sub> C(O) + HCOCH2CO3                                                                                          | 2.15*jx(ip_MGLYOX)                                                                         | Rickard and Pascoe (2009)                          |
| J45019  | TrGJTerC  | CO23C4CO3H + $h\nu$ → CH <sub>3</sub> COCOCH <sub>2</sub> O <sub>2</sub> + CO <sub>2</sub> + OH                                                | jx(ip_CH300H)+jx(ip_HOCH2CHO)                                                              | Rickard and Pascoe (2009)                          |
| J45020  | TrGJTerC  | C512OOH + $h\nu$ → C513O2 + OH                                                                                                                 | jx(ip_CH300H)+jx(ip_HOCH2CHO)                                                              | Rickard and Pascoe (2009)                          |
| J45021  | TrGJTerC  | CO13C4CHO + $h\nu$ → CHOC3COO2 + CO + HO <sub>2</sub>                                                                                          | jx(ip_HOCH2CHO)*2.                                                                         | Rickard and Pascoe (2009)                          |
| J45022  | TrGJTerC  | C513OOH + $h\nu$ → GLYOX + HOC <sub>2</sub> H <sub>4</sub> CO <sub>3</sub> + OH                                                                | jx(ip_CH300H)+jx(ip_HOCH2CHO)                                                              | Rickard and Pascoe (2009)                          |
| J45023  | TrGJTerC  | C513CO + $h\nu$ → HOC <sub>2</sub> H <sub>4</sub> CO <sub>3</sub> + HO <sub>2</sub> + CO + CO                                                  | jx(ip_MGLYOX)+2.15*jx(ip_MGLYOX)                                                           | Rickard and Pascoe (2009)                          |
| J45024  | TrGJTerC  | C514OOH + $h\nu$ → CO13C4CHO + HO <sub>2</sub> + OH                                                                                            | jx(ip_CH300H)+jx(ip_HOCH2CHO)*2.                                                           | Rickard and Pascoe (2009)                          |
| J45025  | TrGJTerCN | C514NO3 + $h\nu$ → CO13C4CHO + HO <sub>2</sub> + NO <sub>2</sub>                                                                               | J_IC3H7N03+jx(ip_HOCH2CHO)*2.                                                              | Rickard and Pascoe (2009)                          |

Table 2: Photolysis reactions (... continued)

| #       | labels   | reaction                                                                                                                               | rate coefficient                       | reference                                                              |
|---------|----------|----------------------------------------------------------------------------------------------------------------------------------------|----------------------------------------|------------------------------------------------------------------------|
| J45026a | TrGJC    | ZCODC23DBCOOH + $h\nu$ → OH + CO + HVMK + OH                                                                                           | J_HPALD*0.6*0.5                        | Taraborrelli (2016),<br>Jenkin et al. (2015),<br>Peeters et al. (2014) |
| J45026b | TrGJC    | ZCODC23DBCOOH + $h\nu$ → OH + CO + CH <sub>3</sub> C(O) + HOCH <sub>2</sub> CHO                                                        | J_HPALD*0.6*0.5                        | Taraborrelli (2016),<br>Jenkin et al. (2015),<br>Peeters et al. (2014) |
| J45026c | TrGJC    | ZCODC23DBCOOH + $h\nu$ → OH + CO + HMAc + OH                                                                                           | J_HPALD*0.4*0.5                        | Taraborrelli (2016),<br>Jenkin et al. (2015),<br>Peeters et al. (2014) |
| J45026d | TrGJC    | ZCODC23DBCOOH + $h\nu$ → OH + CO + CO + CH <sub>3</sub> COCH <sub>2</sub> OH + HO <sub>2</sub>                                         | J_HPALD*0.4*0.5                        | Taraborrelli (2016),<br>Jenkin et al. (2015),<br>Peeters et al. (2014) |
| J45027  | TrGJC    | ZCO3HC23DBCOD + $h\nu$ → .62 EZCH3CO2CHCHO + .38 EZCHOCCH3CHO2 + OH + CO <sub>2</sub>                                                  | J_HPALD                                | Taraborrelli (2016)                                                    |
| J45028a | TrGJC    | C1OOHC2OOHC4OD + $h\nu$ → CH <sub>3</sub> COCH <sub>2</sub> O <sub>2</sub> H + OH + 2 CO + HO <sub>2</sub>                             | 2.77*JX(IP_HOCH2CHO)                   | Taraborrelli (2016)                                                    |
| J45028b | TrGJC    | C1OOHC2OOHC4OD + $h\nu$ → .5 CH <sub>3</sub> COCH <sub>2</sub> O <sub>2</sub> H + .5 HOCHCHO + .5 CO2H3CHO + .5 HCHO + 1.5 OH          | 2.*JX(IP_CH300H)                       | Taraborrelli (2016)                                                    |
| J45029  | TrGC     | DB1OOH + $h\nu$ → DB1O2 + OH                                                                                                           | JX(IP_CH300H)                          | Taraborrelli (2016)                                                    |
| J45030  | TrGC     | DB2OOH + $h\nu$ → .48 CH <sub>3</sub> COCH <sub>2</sub> OH + .52 HOCH <sub>2</sub> CHO + .52 MGLYOX + .48 GLYOX + HO <sub>2</sub> + OH | JX(ip_CH300H)                          | Taraborrelli (2016)                                                    |
| J45031a | TrGJC    | C1ODC2OOHC4OD + $h\nu$ → MGLYOX + HOCHCHO + OH                                                                                         | JX(ip_CH300H)                          | Taraborrelli (2016)                                                    |
| J45031b | TrGJC    | C1ODC2OOHC4OD + $h\nu$ → CO2H3CHO + CO + HO <sub>2</sub> + OH                                                                          | 2.*2.77*JX(IP_HOCH2CHO)                | Taraborrelli (2016)                                                    |
| J45032  | TrGJC    | ZCODC23DBCOD + $h\nu$ → .5 CH <sub>3</sub> COCHCO + .5 HCOCCH <sub>3</sub> CO + CO + HO <sub>2</sub> + OH                              | jx(ip_N02)*0.1*0.5                     | Taraborrelli (2016)*                                                   |
| J45033  | TrGCN    | DB1NO3 + $h\nu$ → DB1O2 + NO <sub>2</sub>                                                                                              | J_IC3H7N03                             | Taraborrelli (2016)                                                    |
| J45034  | TrGJTerC | CHOC3COOOH + $h\nu$ → CHOC3COO2 + CO <sub>2</sub> + OH                                                                                 | jx(ip_CH300H)+jx(ip_HOCH2CHO)+J_ACETOL | Rickard and Pascoe (2009)                                              |
| J45200a | TrGJTerC | LMBOABOOH + $h\nu$ → HOCH <sub>2</sub> CHO + CH <sub>3</sub> COCH <sub>3</sub> + HO <sub>2</sub> + OH                                  | jx(ip_CH300H)*.67                      | Rickard and Pascoe (2009),<br>Taraborrelli (2016)                      |
| J45200b | TrGJTerC | LMBOABOOH + $h\nu$ → IBUTALOH + HCHO + HO <sub>2</sub> + OH                                                                            | jx(ip_CH300H)*.33                      | Rickard and Pascoe (2009),<br>Taraborrelli (2016)                      |
| J45201  | TrGJTerC | MBOACO + $h\nu$ → HCHO + HO <sub>2</sub> + IPRHOCO3                                                                                    | J_ACETOL                               | Rickard and Pascoe (2009)                                              |

Table 2: Photolysis reactions (... continued)

| #       | labels    | reaction                                                                                                                      | rate coefficient                       | reference                                      |
|---------|-----------|-------------------------------------------------------------------------------------------------------------------------------|----------------------------------------|------------------------------------------------|
| J45202  | TrGJTerC  | MBOCOCO + $h\nu$ → CO + HO <sub>2</sub> + IPRHOCO3                                                                            | jx(ip_MGLYOX)                          | Rickard and Pascoe (2009)                      |
| J45203a | TrGJTerCN | LNMBOABOOH + $h\nu$ → NO <sub>3</sub> CH <sub>2</sub> CHO + CH <sub>3</sub> COCH <sub>3</sub> + HO <sub>2</sub> + OH          | jx(ip_CH300H)*.65                      | Rickard and Pascoe (2009), Taraborrelli (2016) |
| J45203b | TrGJTerCN | LNMBOABOOH + $h\nu$ → IBUTALOH + HCHO + NO <sub>2</sub> + OH                                                                  | jx(ip_CH300H)*.35                      | Rickard and Pascoe (2009), Taraborrelli (2016) |
| J45204  | TrGJTerCN | NC4OHCO3H + $h\nu$ → IBUTALOH + CO <sub>2</sub> + NO <sub>2</sub> + OH                                                        | jx(ip_CH300H)                          | Rickard and Pascoe (2009)                      |
| J45400  | TrGJAroC  | C54CO + $h\nu$ → HO <sub>2</sub> + CO + CO + CO + CH <sub>3</sub> C(O)                                                        | jx(ip_MGLYOX)+2.15*jx(ip_MGLYOX)*2     | Rickard and Pascoe (2009)                      |
| J45401  | TrGJAroC  | C5134CO2OH + $h\nu$ → CH <sub>3</sub> COCOCHO + HO <sub>2</sub> + CO + HO <sub>2</sub>                                        | jx(ip_HOCH2CHO)+2.15*jx(ip_MGLYOX)     | Rickard and Pascoe (2009)                      |
| J45402  | TrGJAroC  | C5DIALOOH + $h\nu$ → MALDIAL + CO + HO <sub>2</sub> + OH                                                                      | jx(ip_CH300H)+jx(ip_MACR)              | Rickard and Pascoe (2009)*                     |
| J45406  | TrGJAroC  | C5CO14OH + $h\nu$ → CH <sub>3</sub> C(O) + HCOCO <sub>2</sub> H + HO <sub>2</sub> + CO                                        | jx(ip_MVK)                             | Rickard and Pascoe (2009)                      |
| J45407  | TrGJAroC  | C5DICARB + $h\nu$ → .6 C5CO14O2 + .6 HO <sub>2</sub> + .4 TLFUONE                                                             | jx(ip_N02)*0.2                         | Rickard and Pascoe (2009)*                     |
| J45408  | TrGJAroC  | MC3ODBCO2H + $h\nu$ → CH <sub>3</sub> COCO <sub>2</sub> H + HO <sub>2</sub> + CO + HO <sub>2</sub> + CO                       | jx(ip_MACR)                            | Rickard and Pascoe (2009)                      |
| J45409  | TrGJAroC  | ACCOMMECHO + $h\nu$ → MECOACETO2 + HO <sub>2</sub> + CO                                                                       | jx(ip_HOCH2CHO)                        | Rickard and Pascoe (2009)                      |
| J45410  | TrGJAroC  | MMALNHOOH + $h\nu$ → CO2H3CO3 + CO <sub>2</sub> + OH                                                                          | jx(ip_CH300H)                          | Rickard and Pascoe (2009)*                     |
| J45411  | TrGJAroC  | C5DICAROOH + $h\nu$ → MGLYOX + GLYOX + HO <sub>2</sub> + OH                                                                   | jx(ip_CH300H)+jx(ip_HOCH2CHO)+J_ACETOL | Rickard and Pascoe (2009)*                     |
| J45412  | TrGJAroCN | NTLFUOOH + $h\nu$ → ACCOMECHO + NO <sub>2</sub> + OH                                                                          | jx(ip_CH300H)                          | Rickard and Pascoe (2009)*                     |
| J45414  | TrGJAroC  | C5CO14OOH + $h\nu$ → .83 MALANHY + .83 CH <sub>3</sub> + .17 MGLYOX + .17 HO <sub>2</sub> + .17 CO + .17 CO <sub>2</sub> + OH | jx(ip_CH300H)                          | Rickard and Pascoe (2009)*                     |
| J45415  | TrGJAroC  | TLFUOOH + $h\nu$ → ACCOMECHO + HO <sub>2</sub> + OH                                                                           | jx(ip_CH300H)                          | Rickard and Pascoe (2009)*                     |
| J45417  | TrGJAroC  | ACCOMECO3H + $h\nu$ → MECOACETO2 + CO <sub>2</sub> + OH                                                                       | jx(ip_CH300H)                          | Rickard and Pascoe (2009)                      |
| J45418  | TrGJAroC  | C5DIALCO + $h\nu$ → MALDIALCO3 + CO + HO <sub>2</sub>                                                                         | jx(ip_MGLYOX)+jx(ip_MACR)              | Rickard and Pascoe (2009)                      |
| J46200  | TrGJTerCN | C614NO3 + $h\nu$ → CO23C4CHO + HCHO + HO <sub>2</sub> + NO <sub>2</sub>                                                       | 2.15*jx(ip_MGLYOX)                     | Rickard and Pascoe (2009)                      |
| J46201  | TrGJTerC  | C614OOH + $h\nu$ → CO23C4CHO + HCHO + HO <sub>2</sub> + OH                                                                    | jx(ip_CH300H)+2.15*jx(ip_MGLYOX)       | Rickard and Pascoe (2009)                      |
| J46202  | TrGJTerC  | CO235C5CHO + $h\nu$ → CO23C4CO3 + CO + HO <sub>2</sub>                                                                        | jx(ip_MGLYOX)                          | Rickard and Pascoe (2009)                      |

Table 2: Photolysis reactions (... continued)

| #      | labels    | reaction                                                                                                                       | rate coefficient                                                     | reference                  |
|--------|-----------|--------------------------------------------------------------------------------------------------------------------------------|----------------------------------------------------------------------|----------------------------|
| J46203 | TrGJTerC  | $\text{CO235C6OOH} + h\nu \rightarrow \text{CO23C4CO3} + \text{HCHO} + \text{OH}$                                              | $\text{jx}(\text{ip\_CH300H}) + 2.15 * \text{jx}(\text{ip\_MGLY0X})$ | Rickard and Pascoe (2009)  |
| J46400 | TrGJAroC  | $\text{PHENOOH} + h\nu \rightarrow .71 \text{ MALDALCO2H} + .71 \text{ GLYOX} + .29 \text{ PBZQONE} + \text{HO}_2 + \text{OH}$ | $\text{jx}(\text{ip\_CH300H})$                                       | Rickard and Pascoe (2009)* |
| J46401 | TrGJAroC  | $\text{C6CO4DB} + h\nu \rightarrow \text{C4CO2DBC03} + \text{HO}_2 + \text{CO}$                                                | $\text{jx}(\text{ip\_MGLY0X}) * 2$                                   | Rickard and Pascoe (2009)  |
| J46402 | TrGJAroC  | $\text{C5CO2DCO3H} + h\nu \rightarrow \text{CH}_3\text{C(O)} + \text{HCOCOCHO} + \text{CO}_2 + \text{OH}$                      | $\text{jx}(\text{ip\_CH300H}) + \text{jx}(\text{ip\_MGLY0X})$        | Rickard and Pascoe (2009)  |
| J46403 | TrGJAroCN | $\text{NDNPHENOOH} + h\nu \rightarrow \text{NC4DCO2H} + \text{HNO}_3 + \text{CO} + \text{CO} + \text{NO}_2 + \text{OH}$        | $\text{jx}(\text{ip\_CH300H})$                                       | Rickard and Pascoe (2009)* |
| J46404 | TrGJAroCN | $\text{BZBIPERNO3} + h\nu \rightarrow \text{GLYOX} + \text{HO}_2 + .5 \text{ BZFUONE} + .5 \text{ BZFUONE} + \text{NO}_2$      | J_IC3H7N03                                                           | Rickard and Pascoe (2009)* |
| J46405 | TrGJAroCN | $\text{HOC6H4NO2} + h\nu \rightarrow \text{HONO} + \text{CPDKETENE}$                                                           | $\text{jx}(\text{ip\_HOC6H4N02})$                                    | Chen et al. (2011)*        |
| J46406 | TrGJAroC  | $\text{CPDKETENE} + h\nu \rightarrow \text{CO}_2 + \text{CO} + 2 \text{ HO}_2 + \text{MALDIAL}$                                | J_KETENE                                                             | see note*                  |
| J46407 | TrGJAroC  | $\text{C5COOHCO3H} + h\nu \rightarrow \text{HOCOC4DIAL} + \text{HO}_2 + \text{CO} + \text{CO}_2 + \text{OH}$                   | $\text{jx}(\text{ip\_CH300H})$                                       | Rickard and Pascoe (2009)  |
| J46408 | TrGJAroC  | $\text{BZEPOXMUC} + h\nu \rightarrow .5 \text{ C5DIALO2} + 1.5 \text{ HO}_2 + 1.5 \text{ CO} + .5 \text{ MALDIAL}$             | $4.E3 * \text{jx}(\text{ip\_MVK}) * 0.1$                             | Rickard and Pascoe (2009)  |
| J46409 | TrGJAroCN | $\text{NPHEN1OOH} + h\nu \rightarrow \text{NPHEN1O} + \text{OH}$                                                               | $\text{jx}(\text{ip\_CH300H})$                                       | Rickard and Pascoe (2009)  |
| J46410 | TrGJAroC  | $\text{BZEMUCCO} + h\nu \rightarrow \text{HCOCO2HCO3} + \text{C3DIALO2}$                                                       | $\text{jx}(\text{ip\_HOCH2CHO}) * 2 + \text{J\_ACETOL}$              | Rickard and Pascoe (2009)  |
| J46411 | TrGJAroC  | $\text{BZEMUCCO2H} + h\nu \rightarrow \text{C5DIALO2} + \text{CO}_2 + \text{HO}_2$                                             | $\text{jx}(\text{ip\_MACR})$                                         | Rickard and Pascoe (2009)  |
| J46412 | TrGJAroCN | $\text{NNCATECOOH} + h\nu \rightarrow \text{NC4DCO2H} + \text{HCOCO}_2\text{H} + \text{NO}_2 + \text{OH}$                      | $\text{jx}(\text{ip\_CH300H})$                                       | Rickard and Pascoe (2009)* |
| J46413 | TrGJAroC  | $\text{C615CO2OOH} + h\nu \rightarrow \text{C5DICARB} + \text{CO} + \text{HO}_2 + \text{OH}$                                   | $\text{jx}(\text{ip\_MVK}) + \text{jx}(\text{ip\_CH300H})$           | Rickard and Pascoe (2009)  |
| J46414 | TrGJAroCN | $\text{NPHENOOH} + h\nu \rightarrow \text{MALDALCO2H} + \text{GLYOX} + \text{OH} + \text{NO}_2$                                | $\text{J\_IC3H7N03} + \text{jx}(\text{ip\_CH300H})$                  | Rickard and Pascoe (2009)  |
| J46415 | TrGJAroCN | $\text{NCATECOOH} + h\nu \rightarrow \text{NC4DCO2H} + \text{HCOCO}_2\text{H} + \text{HO}_2 + \text{OH}$                       | $\text{jx}(\text{ip\_CH300H})$                                       | Rickard and Pascoe (2009)* |
| J46416 | TrGJAroC  | $\text{PBZQOOH} + h\nu \rightarrow \text{C5CO2OHCO3} + \text{OH}$                                                              | $\text{jx}(\text{ip\_CH300H})$                                       | Rickard and Pascoe (2009)* |
| J46417 | TrGJAroC  | $\text{BZOBIPEROH} + h\nu \rightarrow \text{MALDIALCO3} + \text{GLYOX} + \text{HO}_2$                                          | J_ACETOL                                                             | Rickard and Pascoe (2009)  |
| J46418 | TrGJAroC  | $\text{BZBIPEROOH} + h\nu \rightarrow \text{GLYOX} + \text{HO}_2 + .5 \text{ BZFUONE} + .5 \text{ BZFUONE} + \text{OH}$        | $\text{jx}(\text{ip\_CH300H})$                                       | Rickard and Pascoe (2009)* |
| J46419 | TrGJAroCN | $\text{NBZQOOH} + h\nu \rightarrow \text{C6CO4DB} + \text{NO}_2 + \text{OH}$                                                   | $\text{jx}(\text{ip\_CH300H})$                                       | Rickard and Pascoe (2009)* |
| J46420 | TrGJAroC  | $\text{CATEC1OOH} + h\nu \rightarrow \text{CATEC1O} + \text{OH}$                                                               | $\text{jx}(\text{ip\_CH300H})$                                       | Rickard and Pascoe (2009)  |
| J46421 | TrGJAroC  | $\text{C6125CO} + h\nu \rightarrow \text{C5CO14O2} + \text{CO} + \text{HO}_2$                                                  | $\text{jx}(\text{ip\_MGLY0X}) + \text{jx}(\text{ip\_MVK})$           | Rickard and Pascoe (2009)  |
| J46422 | TrGJAroCN | $\text{DNPHENO OH} + h\nu \rightarrow \text{NC4DCO2H} + \text{HCOCO}_2\text{H} + \text{NO}_2 + \text{OH}$                      | $\text{jx}(\text{ip\_CH300H})$                                       | Rickard and Pascoe (2009)* |

Table 2: Photolysis reactions (... continued)

| #       | labels    | reaction                                                                                                                                              | rate coefficient                 | reference                      |
|---------|-----------|-------------------------------------------------------------------------------------------------------------------------------------------------------|----------------------------------|--------------------------------|
| J46423  | TrGJAroC  | BZEMUCCO3H + $h\nu$ → C5DIALO2 + CO <sub>2</sub> + OH                                                                                                 | jx(ip_CH300H)+jx(ip_MACR)        | Rickard and Pascoe (2009)      |
| J46424  | TrGJAroC  | C6H5OOH + $h\nu$ → C6H5O + OH                                                                                                                         | jx(ip_CH300H)                    | Rickard and Pascoe (2009)      |
| J46425  | TrGJAroC  | BZEMUCOOH + $h\nu$ → .5 EPXC4DIAL + .5 GLYOX + .5 HO <sub>2</sub> + .5 C3DIALO2 + .5 C32OH13CO + OH                                                   | jx(ip_CH300H)+jx(ip_HOCH2CHO)*2  | Rickard and Pascoe (2009)*     |
| J46427  | TrGJAroCN | BZEMUCNO3 + $h\nu$ → EPXC4DIAL + NO <sub>2</sub> + GLYOX + HO <sub>2</sub>                                                                            | 2.77*jx(ip_HOCH2CHO)             | Rickard and Pascoe (2009)      |
| J46428  | TrGJAroCN | DNPEN + $h\nu$ → HONO + NCPDKETENE                                                                                                                    | jx(ip_HOC6H4NO2)                 | Taraborrelli (2016)            |
| J46429  | TrGJAroCN | NCPDKETENE + $h\nu$ → CO <sub>2</sub> + CO + 2 HO <sub>2</sub> + NC4DCO2H                                                                             | J_KETENE                         | see note*                      |
| J47200  | TrGJTerC  | CO235C6CHO + $h\nu$ → CHOC3COCO3 + CH <sub>3</sub> C(O)                                                                                               | 2.15*jx(ip_MGLYOX)               | Rickard and Pascoe (2009)      |
| J47201  | TrGJTerC  | C235C6CO3H + $h\nu$ → CO235C6O2 + CO <sub>2</sub> + OH                                                                                                | jx(ip_CH300H)+2.15*jx(ip_MGLYOX) | Rickard and Pascoe (2009)      |
| J47202  | TrGJTerC  | C716OOH + $h\nu$ → CO13C4CHO + CH <sub>3</sub> C(O) + OH                                                                                              | jx(ip_CH300H)+jx(ip_HOCH2CHO)    | Rickard and Pascoe (2009)      |
| J47203  | TrGJTerC  | C721OOH + $h\nu$ → C722O2 + OH                                                                                                                        | jx(ip_CH300H)                    | Rickard and Pascoe (2009)      |
| J47204  | TrGJTerC  | C722OOH + $h\nu$ → CH <sub>3</sub> COCH <sub>3</sub> + C44O2 + OH                                                                                     | jx(ip_CH300H)                    | Rickard and Pascoe (2009)      |
| J47400  | TrGJAroC  | TLEPOXMUC + $h\nu$ → .5 C615CO2O2 + HO <sub>2</sub> + CO + .5 EPXC4DIAL + .5 CH <sub>3</sub> C(O)                                                     | 4.E3*jx(ip_MVK)*0.1              | Rickard and Pascoe (2009)      |
| J47401  | TrGJAroC  | C6H5CH2OOH + $h\nu$ → BENZAL + HO <sub>2</sub> + OH                                                                                                   | jx(ip_CH300H)                    | Rickard and Pascoe (2009)*     |
| J47402  | TrGJAroCN | C6H5CH2NO3 + $h\nu$ → BENZAL + HO <sub>2</sub> + NO <sub>2</sub>                                                                                      | 0.59*J_IC3H7N03                  | Rickard and Pascoe (2009)*     |
| J47403  | TrGJAroC  | BENZAL + $h\nu$ → HO <sub>2</sub> + CO + C6H5O2                                                                                                       | jx(ip_BENZAL)                    | T. J. Wallington et al. (2014) |
| J47404  | TrGJAroC  | TLBIPEROOH + $h\nu$ → .6 GLYOX + .4 MGLYOX + HO <sub>2</sub> + .2 ZCODC23DBCOD + .2 C5DICARB + .2 TLFUONE + .2 BZFUONE + .2 MALDIAL + OH              | jx(ip_CH300H)                    | Rickard and Pascoe (2009)*     |
| J47405  | TrGJAroCN | TLBIPERNO3 + $h\nu$ → .6 GLYOX + .4 MGLYOX + HO <sub>2</sub> + .2 ZCODC23DBCOD + .2 C5DICARB + .2 TLFUONE + .2 BZFUONE + .2 MALDIAL + NO <sub>2</sub> | J_IC3H7N03                       | Rickard and Pascoe (2009)*     |
| J47406  | TrGJAroC  | TLOBIPEROH + $h\nu$ → C5CO14O2 + GLYOX + HO <sub>2</sub>                                                                                              | J_ACETOL                         | Rickard and Pascoe (2009)      |
| J47407  | TrGJAroC  | CRESOOH + $h\nu$ → .68 C5CO14OH + .68 GLYOX + HO <sub>2</sub> + .32 PTLQONE + OH                                                                      | jx(ip_CH300H)                    | Rickard and Pascoe (2009)*     |
| J47408a | TrGJAroCN | NCRESOOH + $h\nu$ → .68 C5CO14OH + .68 GLYOX + HO <sub>2</sub> + .32 PTLQONE + OH + NO <sub>2</sub>                                                   | J_IC3H7N03                       | Rickard and Pascoe (2009)*     |
| J47408b | TrGJAroCN | NCRESOOH + $h\nu$ → C5CO14OH + GLYOX + NO <sub>2</sub> + OH                                                                                           | jx(ip_CH300H)                    | Rickard and Pascoe (2009)*     |
| J47409  | TrGJAroCN | TOL1OHNO2 + $h\nu$ → HONO + MCPDKETENE                                                                                                                | jx(ip_HOPh3Me2NO2)               | see note*                      |
| J47410  | TrGJAroC  | TLEMUCCO2H + $h\nu$ → C615CO2O2 + CO <sub>2</sub> + HO <sub>2</sub>                                                                                   | jx(ip_MACR)                      | Rickard and Pascoe (2009)      |

Table 2: Photolysis reactions (... continued)

| #      | labels    | reaction                                                                                            | rate coefficient                            | reference                  |
|--------|-----------|-----------------------------------------------------------------------------------------------------|---------------------------------------------|----------------------------|
| J47411 | TrGJAroC  | TLEMUCCO3H + $h\nu$ → C615CO2O2 + CO <sub>2</sub> + OH                                              | jx(ip_CH300H)+jx(ip_MACR)                   | Rickard and Pascoe (2009)  |
| J47412 | TrGJAroC  | TLEMUCOOH + $h\nu$ → .5 C3DIALO2 + .5 CO2H3CHO + .5 EPXC4DIAL + .5 MGLYOX + .5 HO <sub>2</sub> + OH | jx(ip_CH300H)+2.77*jx(ip_HOCH2CHO)+J_ACETOL | Rickard and Pascoe (2009)* |
| J47413 | TrGJAroCN | TLEMUCNO3 + $h\nu$ → EPXC4DIAL + NO <sub>2</sub> + CH <sub>3</sub> C(O) + CO + HO <sub>2</sub>      | 2.77*jx(ip_HOCH2CHO)+J_ACETOL               | Rickard and Pascoe (2009)  |
| J47414 | TrGJAroC  | TLEMUCCO + $h\nu$ → CH <sub>3</sub> C(O) + EPXC4DIAL + CO + HO <sub>2</sub>                         | 2.77*jx(ip_HOCH2CHO)+2.15*jx(ip_MGLYOX)     | Rickard and Pascoe (2009)  |
| J47415 | TrGJAroC  | C6H5CO3H + $h\nu$ → C6H5O2 + CO <sub>2</sub> + OH                                                   | jx(ip_CH300H)                               | Rickard and Pascoe (2009)  |
| J47416 | TrGJAroC  | OXYL1OOH + $h\nu$ → TOL1O + OH                                                                      | jx(ip_CH300H)                               | Rickard and Pascoe (2009)  |
| J47417 | TrGJAroCN | MNCATECH + $h\nu$ → HONO + MCPDKETENE                                                               | jx(ip_HOPh3Me2NO2)                          | see note*                  |
| J47418 | TrGJAroC  | MCPDKETENE + $h\nu$ → CO <sub>2</sub> + CO + 2 HO <sub>2</sub> + ZCODC23DBCOD                       | J_KETENE                                    | see note*                  |
| J47419 | TrGJAroCN | DNCRES + $h\nu$ → HONO + MNCPDKETENE                                                                | jx(ip_HOPh3Me2NO2)                          | see note*                  |
| J47420 | TrGJAroCN | MNCPDKETENE + $h\nu$ → CO <sub>2</sub> + CO + 2 HO <sub>2</sub> + NC4MDCO2HN                        | J_KETENE                                    | see note*                  |
| J47421 | TrGJAroC  | MCATEC1OOH + $h\nu$ → MCATEC1O + OH                                                                 | jx(ip_CH300H)                               | Rickard and Pascoe (2009)  |
| J47422 | TrGJAroCN | NPTLQOOH + $h\nu$ → C7CO4DB + NO <sub>2</sub> + OH                                                  | jx(ip_CH300H)                               | Rickard and Pascoe (2009)* |
| J47423 | TrGJAroC  | PTLQOOH + $h\nu$ → C6CO2OHCO3 + OH                                                                  | jx(ip_CH300H)                               | Rickard and Pascoe (2009)* |
| J47424 | TrGJAroCN | NCRES1OOH + $h\nu$ → NCRES1O + OH                                                                   | jx(ip_CH300H)                               | Rickard and Pascoe (2009)  |
| J47425 | TrGJAroCN | MNNCATCOOH + $h\nu$ → NC4MDCO2HN + HCOCO <sub>2</sub> H + NO <sub>2</sub> + OH                      | jx(ip_CH300H)                               | Rickard and Pascoe (2009)* |
| J47426 | TrGJAroCN | MNCATECOOH + $h\nu$ → NC4MDCO2HN + HCOCO <sub>2</sub> H + HO <sub>2</sub> + OH                      | jx(ip_CH300H)                               | Rickard and Pascoe (2009)* |
| J47427 | TrGJAroC  | C7CO4DB + $h\nu$ → C5CO2DBCO3 + HO <sub>2</sub> + CO                                                | jx(ip_MGLYOX)*2                             | Rickard and Pascoe (2009)  |
| J47428 | TrGJAroCN | NDNCRESOOH + $h\nu$ → NC4MDCO2HN + HNO <sub>3</sub> + CO + CO + NO <sub>2</sub> + OH                | jx(ip_CH300H)                               | Rickard and Pascoe (2009)* |
| J47429 | TrGJAroCN | DNCRESOOH + $h\nu$ → NC4MDCO2HN + HCOCO <sub>2</sub> H + NO <sub>2</sub> + OH                       | jx(ip_CH300H)                               | Rickard and Pascoe (2009)* |
| J47430 | TrGJAroC  | C6COOHCO3H + $h\nu$ → C5134CO2OH + HO <sub>2</sub> + CO + CO <sub>2</sub> + OH                      | jx(ip_CH300H)                               | Rickard and Pascoe (2009)  |
| J48200 | TrGJTerC  | C86OOH + $h\nu$ → C511O2 + CH <sub>3</sub> COCH <sub>3</sub> + OH                                   | jx(ip_CH300H)+ jx(ip_HOCH2CHO)              | Rickard and Pascoe (2009)  |
| J48201 | TrGJTerC  | C812OOH + $h\nu$ → C813O2 + OH                                                                      | jx(ip_CH300H)                               | Rickard and Pascoe (2009)  |
| J48202 | TrGJTerC  | C813OOH + $h\nu$ → CH <sub>3</sub> COCH <sub>3</sub> + C512O2 + OH                                  | jx(ip_CH300H)+jx(ip_MGLYOX)                 | Rickard and Pascoe (2009)  |

Table 2: Photolysis reactions (... continued)

| #       | labels    | reaction                                                            | rate coefficient                       | reference                                      |
|---------|-----------|---------------------------------------------------------------------|----------------------------------------|------------------------------------------------|
| J48203  | TrGJTerC  | $C721CHO + h\nu \rightarrow C721O2 + CO + HO_2$                     | $jx(ip\_HOCH2CHO)$                     | Rickard and Pascoe (2009)                      |
| J48204  | TrGJTerC  | $C721CO3H + h\nu \rightarrow C721O2 + CO_2 + OH$                    | $jx(ip\_CH300H)$                       | Rickard and Pascoe (2009)                      |
| J48205  | TrGJTerC  | $C8BCOOH + h\nu \rightarrow C89O2 + OH$                             | $jx(ip\_CH300H)$                       | Rickard and Pascoe (2009)                      |
| J48206  | TrGJTerC  | $C89OOH + h\nu \rightarrow C810O2 + OH$                             | $jx(ip\_CH300H)+jx(ip\_HOCH2CHO)$      | Rickard and Pascoe (2009)                      |
| J48207  | TrGJTerCN | $C89NO3 + h\nu \rightarrow C810O2 + NO_2$                           | $jx(ip\_CH300H)+jx(ip\_HOCH2CHO)$      | Rickard and Pascoe (2009)                      |
| J48208  | TrGJTerC  | $C810OOH + h\nu \rightarrow CH_3COCH_3 + C514O2 + OH$               | $jx(ip\_CH300H)+jx(ip\_HOCH2CHO)$      | Rickard and Pascoe (2009)                      |
| J48209  | TrGJTerCN | $C810NO3 + h\nu \rightarrow CH_3COCH_3 + C514O2 + NO_2$             | $2.84*J\_IC3H7N03+jx(ip\_HOCH2CHO)$    | Rickard and Pascoe (2009)                      |
| J48210  | TrGJTerCN | $C8BCNO3 + h\nu \rightarrow C89O2 + NO_2$                           | $J\_IC3H7N03$                          | Rickard and Pascoe (2009)                      |
| J48211  | TrGJTerC  | $C85OOH + h\nu \rightarrow C86O2 + OH$                              | $jx(ip\_CH300H)+J\_ACETOL$             | Rickard and Pascoe (2009)                      |
| J48400  | TrGJAroC  | $STYRENOOH + h\nu \rightarrow HO_2 + HCHO + BENZAL + OH$            | $jx(ip\_CH300H)$                       | Rickard and Pascoe (2009)*                     |
| J49200  | TrGJTerC  | $C96OOH + h\nu \rightarrow C97O2 + OH$                              | $jx(ip\_CH300H)+J\_ACETOL$             | Rickard and Pascoe (2009)                      |
| J49201  | TrGJTerC  | $C97OOH + h\nu \rightarrow C98O2 + OH$                              | $jx(ip\_CH300H)+J\_ACETOL$             | Rickard and Pascoe (2009)                      |
| J49202  | TrGJTerC  | $C98OOH + h\nu \rightarrow C614O2 + CH_3COCH_3 + OH$                | $(jx(ip\_CH300H)+2.15*jx(ip\_MGLYOX))$ | Rickard and Pascoe (2009)                      |
| J49203a | TrGJTerC  | $NORPINAL + h\nu \rightarrow C85O2 + CO + HO_2$                     | $jx(ip\_PINAL2HCO)$                    | Rickard and Pascoe (2009), Taraborrelli (2016) |
| J49203b | TrGJTerC  | $NORPINAL + h\nu \rightarrow NORPINENOL$                            | $jx(ip\_PINAL2ENOL)$                   | Taraborrelli (2016), Andrews et al. (2012)     |
| J49204  | TrGJTerC  | $C85CO3H + h\nu \rightarrow C85O2 + CO_2 + OH$                      | $jx(ip\_CH300H)+J\_ACETOL$             | Rickard and Pascoe (2009)                      |
| J49205  | TrGJTerC  | $C89CO2H + h\nu \rightarrow .8 C811CO3 + .2 C89O2 + .2 CO_2 + HO_2$ | $jx(ip\_HOCH2CHO)$                     | Rickard and Pascoe (2009)                      |
| J49206  | TrGJTerC  | $C89CO3H + h\nu \rightarrow .8 C811CO3 + .2 C89O2 + .2 CO_2 + OH$   | $jx(ip\_CH300H)+jx(ip\_HOCH2CHO)$      | Rickard and Pascoe (2009)                      |
| J49207  | TrGJTerC  | $C811CO3H + h\nu \rightarrow C811O2 + CO_2 + OH$                    | $jx(ip\_CH300H)$                       | Rickard and Pascoe (2009)                      |
| J49208  | TrGJTerC  | $NOPINDOOH + h\nu \rightarrow C89CO3 + OH$                          | $jx(ip\_CH300H)$                       | Rickard and Pascoe (2009)                      |
| J40200  | TrGJTerC  | $LAPINABOOH + h\nu \rightarrow PINAL + HO_2 + OH$                   | $jx(ip\_CH300H)$                       | Rickard and Pascoe (2009)                      |
| J40201  | TrGJTerC  | $MENTHEN6ONE + h\nu \rightarrow RO6R1O2 + OH$                       | $jx(ip\_CH300H)$                       | Vereecken et al. (2007)                        |
| J40202  | TrGJTerC  | $2OHMENTHEN6ONE + h\nu \rightarrow 10 LCARBON + OH$                 | $jx(ip\_CH300H)$                       | Vereecken et al. (2007)                        |
| J40203a | TrGJTerC  | $PINAL + h\nu \rightarrow C96O2 + CO + HO_2$                        | $jx(ip\_PINAL2HCO)$                    | Rickard and Pascoe (2009)                      |
| J40203b | TrGJTerC  | $PINAL + h\nu \rightarrow PINEOL$                                   | $jx(ip\_PINAL2ENOL)$                   | Taraborrelli (2016), Andrews et al. (2012)*    |
| J40204  | TrGJTerC  | $PERPINONIC + h\nu \rightarrow C96O2 + CO_2 + OH$                   | $jx(ip\_CH300H)+J\_ACETOL$             | Rickard and Pascoe (2009)                      |
| J40205  | TrGJTerC  | $PINALOOH + h\nu \rightarrow C106O2 + OH$                           | $jx(ip\_CH300H)+jx(ip\_HOCH2CHO)$      | Rickard and Pascoe (2009)                      |
| J40206  | TrGJTerCN | $PINALNO3 + h\nu \rightarrow C106O2 + NO_2$                         | $J\_IC3H7N03+jx(ip\_HOCH2CHO)$         | Rickard and Pascoe (2009)                      |
| J40207  | TrGJTerC  | $C106OOH + h\nu \rightarrow C716O2 + CH_3COCH_3 + OH$               | $jx(ip\_CH300H)+jx(ip\_HOCH2CHO)$      | Rickard and Pascoe (2009)                      |

Table 2: Photolysis reactions (... continued)

| #      | labels    | reaction                                                                                           | rate coefficient                                    | reference                 |
|--------|-----------|----------------------------------------------------------------------------------------------------|-----------------------------------------------------|---------------------------|
| J40208 | TrGJTerCN | $\text{C106NO}_3 + h\nu \rightarrow \text{C716O}_2 + \text{CH}_3\text{COCH}_3 + \text{NO}_2$       | $\text{J\_IC3H7N03} + \text{jx(ip\_HOCH2CHO)}$      | Rickard and Pascoe (2009) |
| J40209 | TrGJTerC  | $\text{C109OOH} + h\nu \rightarrow \text{C89CO}_3 + \text{HCHO} + \text{OH}$                       | $\text{jx(ip\_CH300H)} + \text{jx(ip\_HOCH2CHO)}$   | Rickard and Pascoe (2009) |
| J40210 | TrGJTerC  | $\text{C109CO} + h\nu \rightarrow \text{C89CO}_3 + \text{CO} + \text{HO}_2$                        | $\text{jx(ip\_MGLYOX)} + \text{jx(ip\_HOCH2CHO)}$   | Rickard and Pascoe (2009) |
| J40211 | TrGJTerCN | $\text{LNAPINABOOH} + h\nu \rightarrow \text{PINAL} + \text{NO}_2 + \text{OH}$                     | $\text{jx(ip\_CH300H)}$                             | Rickard and Pascoe (2009) |
| J40212 | TrGJTerC  | $\text{BPINAOOH} + h\nu \rightarrow \text{NOPINONE} + \text{HCHO} + \text{HO}_2 + \text{OH}$       | $\text{jx(ip\_CH300H)}$                             | Rickard and Pascoe (2009) |
| J40213 | TrGJTerCN | $\text{LNBPINABOOH} + h\nu \rightarrow \text{NOPINONE} + \text{HCHO} + \text{NO}_2 + \text{OH}$    | $\text{jx(ip\_CH300H)}$                             | Rickard and Pascoe (2009) |
| J40214 | TrGJTerCN | $\text{ROO6R1NO}_3 + h\nu \rightarrow \text{ROO6R3O}_2 + \text{CH}_3\text{COCH}_3 + \text{NO}_2$   | $2.84 * \text{J\_IC3H7N03} + \text{jx(ip\_CH300H)}$ | Taraborrelli (2016)       |
| J40215 | TrGJTerCN | $\text{RO6R1NO}_3 + h\nu \rightarrow 9 \text{ L CARBON} + \text{HCHO} + \text{HO}_2 + \text{NO}_2$ | $2.84 * \text{J\_IC3H7N03}$                         | Taraborrelli (2016)       |

## General notes

J-values are calculated with an external module (e.g., JVAL) and then supplied to the MECCA chemistry.

Values that originate from the Master Chemical Mechanism (MCM) by Rickard and Pascoe (2009) are translated according in the following way:

$\text{J(11)} \rightarrow \text{jx(ip\_COH2)}$   
 $\text{J(12)} \rightarrow \text{jx(ip\_CHOH)}$   
 $\text{J(15)} \rightarrow \text{jx(ip\_HOCH2CHO)}$   
 $\text{J(18)} \rightarrow \text{jx(ip\_MACR)}$   
 $\text{J(22)} \rightarrow \text{jx(ip\_ACETOL)}$   
 $\text{J(23)} + \text{J(24)} \rightarrow \text{jx(ip\_MVK)}$   
 $\text{J(31)} + \text{J(32)} + \text{J(33)} \rightarrow \text{jx(ip\_GLYOX)}$   
 $\text{J(34)} \rightarrow \text{jx(ip\_MGLYOX)}$   
 $\text{J(41)} \rightarrow \text{jx(ip\_CH300H)}$   
 $\text{J(53)} \rightarrow \text{J(iC}_3\text{H}_7\text{ONO}_2)$   
 $\text{J(54)} \rightarrow \text{J(iC}_3\text{H}_7\text{ONO}_2)$   
 $\text{J(55)} \rightarrow \text{J(iC}_3\text{H}_7\text{ONO}_2)$   
 $\text{J(56)} + \text{J(57)} \rightarrow \text{jx(ip\_NOA)}$

## Specific notes

J41006: product distribution as for  $\text{HNO}_4$

J42007: It is assumed that  $\text{J(PHAN)}$  is the same as  $\text{J(PAN)}$ .

J42017: Enhancement of J according to Müller et al. (2014).

J42020: It is assumed that  $\text{J(NO}_3\text{CH}_2\text{CHO)}$  is the same as  $\text{J(PAN)}$ .

J42021: In analogy to what is assumed for  $\text{CH}_3\text{O}_2\text{NO}_2$  photolysis as in (Sander et al., 2014).

J43002: Following von Kuhlmann et al. (2003), we use  $\text{J(CH}_3\text{COCH}_2\text{OH)} = 0.11 * \text{jx(ip\_CHOH)}$ . As an additional factor, the quantum yield of 0.65 is taken from Orlando et al. (1999a).

J43006: Following von Kuhlmann et al. (2003), we use  $\text{J(iC}_3\text{H}_7\text{ONO}_2) = 3.7 * \text{jx(ip\_PAN)}$ .

J43018: One third of the acetaldehyde channel is considered to be  $\text{CH}_2\text{CHOH}$  according to Hjorth (2002) EUPHORE Report.

J43024: Assuming  $\text{J(C}_3\text{H}_7\text{ONO}_2) = 0.59 \times \text{J(iC}_3\text{H}_7\text{ONO}_2)$ , consistent with the photolysis rate coefficients used in the MCM (Rickard and Pascoe, 2009).

J43025a: Photolysis frequencies very similar to the ones of  $\text{CH}_3\text{CHO}$ .

J43025b: Photolysis frequencies very similar to the ones of  $\text{CH}_3\text{CHO}$ .

J43400:  $\text{KDEC C3DIALO} \rightarrow \text{GLYOX} + \text{CO} + \text{HO}_2$

J44004: It is assumed that  $\text{J(BIACET)}$  is 2.15 times larger than  $\text{J(MGLYOX)}$ , consistent with the photolysis rate coefficients used in the MCM (Rickard and Pascoe, 2009).

J44005a: It is assumed that  $\text{J(LC}_4\text{H}_9\text{NO}_3)$  is the same as  $\text{J(iC}_3\text{H}_7\text{ONO}_2)$ .

J44005b: It is assumed that  $\text{J(LC}_4\text{H}_9\text{NO}_3)$  is the same as  $\text{J(iC}_3\text{H}_7\text{ONO}_2)$ .

J44006: It is assumed that  $\text{J(MPAN)}$  is the same as  $\text{J(PAN)}$ .

J44009: It is assumed that  $\text{J(MACROOH)}$  is 2.77 times larger than  $\text{J(HOCH}_2\text{CHO)}$ , consistent with the photolysis rate coefficients used in the MCM (Rickard and Pascoe, 2009).

J44010: It is assumed that  $\text{J(MACROH)}$  is 2.77 times larger than  $\text{J(HOCH}_2\text{CHO)}$ , consistent with the photolysis rate coefficients used in the MCM (Rickard and Pascoe, 2009).

J44015: It is assumed that  $\text{J(BIACETOH)}$  is 2.15 times larger than  $\text{J(MGLYOX)}$ , consistent with the photolysis

rate coefficients used in the MCM (Rickard and Pascoe, 2009).

**J44017a:** CO-channel yielding  $\text{CH}_3\text{COCH}$  which upon reaction with  $\text{O}_2$  produces an excited Criegee Intermediate assumed to be similar to MGLOOA in MCM. MGLOOA is produced also in other reactions and is substituted by its decomposition products. Furthermore, the stabilized Criegee Intermediate is assumed to solely react with water.

**J44025:** J values only for the secondary nitrate.

**J44026:** Like for LMEKNO3 photolysis

**J44027:**  $2.84 \times \text{J}(\text{IC}_3\text{H}_7\text{NO}_3)$  like for other tertiary alkyl nitrates (see J4505). Enhancement of J according to Müller et al. (2014).

**J44037b:** Channel which produces just vinyl alcohol and not a larger enol via keto-enol photo- tautomerization.

**J44043:** The resulting vinyl peroxy radical is assumed to mostly form with  $\text{HO}_2$  a labile hydroperoxide (see ketene formation). The products are further simplified.

**J44044:** 1,5-H-shift for the resulting vinyl peroxy radical assumed to be dominant.

**J44046a:** Simplified oxidation.

**J44400b:**  $\text{KDEC MALDIALO} \rightarrow \text{GLYOX} + \text{GLYOX} + \text{HO}_2$

**J44401:**  $\text{KDEC BZFUO} \rightarrow \text{CO}_2\text{H}_3\text{CHO} + \text{HO}_2$

**J44403:**  $\text{KDEC NBZFUO} \rightarrow .5 \text{CO}_2\text{H}_3\text{CHO} + .5 \text{NO}_2 + .5 \text{NBZFUONE} + .5 \text{HO}_2$

**J44404b:**  $\text{KDEC MALDIALCO}_2 \rightarrow .6 \text{MALANHY} + \text{HO}_2 + .4 \text{GLYOX} + .4 \text{CO}$

**J44407:**  $\text{KDEC MALANHYO} \rightarrow \text{HCOCOHC}_3\text{O}_3$

**J44414:**  $\text{KDEC MECOACETO} \rightarrow \text{CH}_3\text{CO}_3 + \text{HCHO}$

**J45003:** It is assumed that  $\text{J}(\text{LISOPACNO}_3) = 0.59 \times \text{J}(\text{IC}_3\text{H}_7\text{ONO}_2)$ , consistent with the photolysis rate coefficients used in the MCM (Rickard and Pascoe, 2009).

**J45005:** It is assumed that  $\text{J}(\text{ISOPBNO}_3) = 2.84 \times \text{J}(\text{IC}_3\text{H}_7\text{ONO}_2)$ , consistent with the photolysis rate coefficients used in the MCM (Rickard and Pascoe, 2009).

**J45007:** It is assumed that  $\text{J}(\text{ISOPDNO}_3)$  is the same as  $\text{J}(\text{IC}_3\text{H}_7\text{ONO}_2)$ .

**J45009:**  $0.59 \times \text{J}(\text{IC}_3\text{H}_7\text{NO}_3)$  like for other primary alkyl nitrates (see J4503). Enhancement of J according to Müller et al. (2014).

**J45015:** Consistent with the MCM (Rickard and Pascoe, 2009), we assume that  $\text{J}(\text{HCOC}_5)$  is half as large as  $\text{J}(\text{MVK})$ . With exception of  $\text{HOCH}_2\text{CO}$  the products of  $\text{MACO}_2$  decomposition without  $\text{CO}_2$ .

**J45032:** approximation with 4-oxo-pentenal photolysis combining results of Thner et al(2004) and Xiang et al(2007)

**J45402:**  $\text{KDEC C}_5\text{DIALO} \rightarrow \text{MALDIAL} + \text{CO} + \text{HO}_2$

**J45407:**  $\text{KDEC TLFUONE} \rightarrow .6 \text{C}_5\text{CO}_{14}\text{O}_2 + .6 \text{HO}_2 + .4 \text{TLFUONE}$

**J45410:**  $\text{KDEC MMALANHYO} \rightarrow \text{CO}_2\text{H}_3\text{CO}_3$

**J45411:**  $\text{KDEC C}_5\text{DICARBO} \rightarrow \text{MGLYOX} + \text{GLYOX} + \text{HO}_2$

**J45412:**  $\text{KDEC NTLFUO} \rightarrow \text{ACCOMEC}_3\text{HO} + \text{NO}_2$

**J45414:**  $\text{KDEC C}_5\text{CO}_{14}\text{CO}_2 \rightarrow .83 \text{MALANHY} + .83 \text{CH}_3 + .17 \text{MGLYOX} + .17 \text{HO}_2 + .17 \text{CO} + .17 \text{CO}_2$

**J45415:**  $\text{KDEC TLFUO} \rightarrow \text{ACCOMEC}_3\text{HO} + \text{HO}_2$

**J46400:**  $\text{KDEC PHENO} \rightarrow .71 \text{MALDALCO}_2\text{H} + .71 \text{GLYOX} + .29 \text{PBZQONE} + \text{HO}_2$

**J46403:**  $\text{KDEC NDNPHENO} \rightarrow \text{NC}_4\text{DCO}_2\text{H} + \text{HNO}_3 + \text{CO} + \text{CO} + \text{NO}_2$

**J46404:**  $\text{KDEC BZBIPERO} \rightarrow \text{GLYOX} + \text{HO}_2 + .5 \text{BZFUONE} + .5 \text{BZFUONE}$

**J46405:** new channel created for nitrophenol decomposition

**J46406:** new channel created for nitrophenol decomposition

**J46412:**  $\text{KDEC NNCATECO} \rightarrow \text{NC}_4\text{DCO}_2\text{H} + \text{HCOCO}_2\text{H} + \text{NO}_2$

**J46415:**  $\text{KDEC NCATECO} \rightarrow \text{NC}_4\text{DCO}_2\text{H} + \text{HCOCO}_2\text{H} + \text{HO}_2$

**J46416:**  $\text{KDEC PBZQO} \rightarrow \text{C}_5\text{CO}_2\text{OHCO}_3$

**J46418:**  $\text{KDEC BZBIPERO} \rightarrow \text{GLYOX} + \text{HO}_2 + .5 \text{BZFUONE} + .5 \text{BZFUONE}$

**J46419:**  $\text{KDEC NBZQO} \rightarrow \text{C}_6\text{CO}_4\text{DB} + \text{NO}_2$

**J46422:**  $\text{KDEC DNPHEO} \rightarrow \text{NC}_4\text{DCO}_2\text{H} + \text{HCOCO}_2\text{H} + \text{NO}_2$

**J46425:**  $\text{KDEC BZEMUCO} \rightarrow .5 \text{EPXC}_4\text{DIAL} + .5 \text{GLYOX} + .5 \text{HO}_2 + .5 \text{C}_3\text{DIALO}_2 + .5 \text{C}_3\text{OH}_{13}\text{CO}$

**J46429:** new channel

**J47401:**  $\text{KROPRIM}^*\text{O}_2$  fast reaction  $\text{C}_6\text{H}_5\text{CH}_2\text{O} = \text{BENZAL} + \text{HO}_2$

**J47402:**  $\text{KROPRIM}^*\text{O}_2$  fast reaction  $\text{C}_6\text{H}_5\text{CH}_2\text{O} = \text{BENZAL} + \text{HO}_2$

**J47404:**  $\text{KDEC TLBIPERO} \rightarrow .6 \text{GLYOX} + .4 \text{MGLYOX} + \text{HO}_2 + .2 \text{ZC}_2\text{O}_2\text{C}_3\text{DBCOD} + .2 \text{C}_5\text{DICARB} + .2 \text{TLFUONE} + .2 \text{BZFUONE} + .2 \text{MALDIAL}$

**J47405:**  $\text{KDEC TLBIPERO} \rightarrow .6 \text{GLYOX} + .4 \text{MGLYOX} + \text{HO}_2 + .2 \text{ZC}_2\text{O}_2\text{C}_3\text{DBCOD} + .2 \text{C}_5\text{DICARB} + .2 \text{TLFUONE} + .2 \text{BZFUONE} + .2 \text{MALDIAL}$

**J47407:**  $\text{KDEC CRESO} \rightarrow .68 \text{C}_5\text{CO}_{14}\text{OH} + .68 \text{GLYOX} + \text{HO}_2 + .32 \text{PTLQONE}$

|                                                                                                  |                                                                |                                                                                  |
|--------------------------------------------------------------------------------------------------|----------------------------------------------------------------|----------------------------------------------------------------------------------|
| J47408a: KDEC CRESO $\rightarrow$ .68 C5CO14OH + .68 GLYOX + HO2 + .32 PTLQONE                   | J47418: new channel                                            | J47428: KDEC NDNCRESO $\rightarrow$ NC4MDCO2H + HNO3 + CO + CO + NO2             |
| J47408b: KDEC NCRESO $\rightarrow$ C5CO14OH + GLYOX + NO2                                        | J47419: Using J for 3-methyl-2-nitrophenol.                    | J47429: KDEC DNCRESO $\rightarrow$ NC4MDCO2H + HCOCO2H + NO2                     |
| J47409: Using J for 3-methyl-2-nitrophenol.                                                      | J47420: new channel                                            | J48400: KDEC STYRENO $\rightarrow$ HO2 + HCHO + BENZAL                           |
| J47412: KDEC TLEMUCO $\rightarrow$ .5 C3DIALO2 + .5 CO2H3CHO + .5 EPXC4DIAL + .5 MGLYOX + .5 HO2 | J47422: KDEC NPTLQO $\rightarrow$ C7CO4DB + NO2                | J40203b: Substituted vinyl alcohol in analogy to CH <sub>3</sub> CHO photolysis. |
| J47417: Using J for 3-methyl-2-nitrophenol.                                                      | J47423: KDEC PTLQO $\rightarrow$ C6CO2OHCO3                    |                                                                                  |
|                                                                                                  | J47425: KDEC MNNCATECO $\rightarrow$ NC4MDCO2H + HCOCO2H + NO2 |                                                                                  |
|                                                                                                  | J47426: KDEC MNCATECO $\rightarrow$ NC4MDCO2H + HCOCO2H + HO2  |                                                                                  |

Table 3: Henry’s law coefficients

| substance                                    | $\frac{k_H^\ominus}{\text{M/atm}}$   | $\frac{-\Delta_{\text{soln}}H/R}{\text{K}}$ | reference                       |
|----------------------------------------------|--------------------------------------|---------------------------------------------|---------------------------------|
| O <sub>2</sub>                               | $1.3 \times 10^{-3}$                 | 1500.                                       | Wilhelm et al. (1977)           |
| O <sub>3</sub>                               | $1.2 \times 10^{-2}$                 | 2560.                                       | Chameides (1984)                |
| OH                                           | $3.0 \times 10^1$                    | 4300.                                       | Hanson et al. (1992)            |
| HO <sub>2</sub>                              | $3.9 \times 10^3$                    | 5900.                                       | Hanson et al. (1992)            |
| H <sub>2</sub> O <sub>2</sub>                | $1. \times 10^5$                     | 6338.                                       | Lind and Kok (1994)             |
| H <sub>2</sub> O                             | BIG                                  | 0.                                          | see note                        |
| NH <sub>3</sub>                              | 58.                                  | 4085.                                       | Chameides (1984)                |
| NO                                           | $1.9 \times 10^{-3}$                 | 1480.                                       | Schwartz and White (1981)       |
| NO <sub>2</sub>                              | $7.0 \times 10^{-3}$                 | 2500.                                       | Lee and Schwartz (1981)*        |
| NO <sub>3</sub>                              | 2.                                   | 2000.                                       | Thomas et al. (1993)            |
| N <sub>2</sub> O <sub>5</sub>                | BIG                                  | 0.                                          | see note                        |
| HONO                                         | $4.9 \times 10^1$                    | 4780.                                       | Schwartz and White (1981)       |
| HNO <sub>3</sub>                             | $2.45 \times 10^6 / 1.5 \times 10^1$ | 8694.                                       | Brimblecombe and Clegg (1989)*  |
| HNO <sub>4</sub>                             | $1.2 \times 10^4$                    | 6900.                                       | Régimbal and Mozurkewich (1997) |
| CH <sub>3</sub> OH                           | $2.20 \times 10^2$                   | 5200.                                       | Snider and Dawson (1985)        |
| CH <sub>3</sub> O <sub>2</sub>               | 6.                                   | 5600.                                       | Jacob (1986)*                   |
| CH <sub>3</sub> OOH                          | $3.0 \times 10^2$                    | 5322.                                       | Lind and Kok (1994)             |
| CO <sub>2</sub>                              | $3.1 \times 10^{-2}$                 | 2423.                                       | Chameides (1984)                |
| HCHO                                         | $7.0 \times 10^3$                    | 6425.                                       | Chameides (1984)                |
| HCOOH                                        | $3.7 \times 10^3$                    | 5700.                                       | Chameides (1984)                |
| CH <sub>3</sub> COOH                         | $4.1 \times 10^3$                    | 6200.                                       | Sander et al. (2006)            |
| PAN                                          | 2.8                                  | 5730.                                       | Sander et al. (2006)            |
| C <sub>2</sub> H <sub>5</sub> O <sub>2</sub> | 6.                                   | 5600.                                       | see note                        |
| CH <sub>3</sub> CHO                          | $1.29 \times 10^1$                   | 5890.                                       | Sander et al. (2006)            |
| GLYOX                                        | $4.19 \times 10^5$                   | 7481.                                       | Sander et al. (2011)            |
| HOCH <sub>2</sub> CO <sub>2</sub> H          | $2.83 \times 10^4$                   | 4029.                                       | Ip et al. (2009)                |
| HOCH <sub>2</sub> CHO                        | $4.10 \times 10^4$                   | 4600.                                       | Betterton and Hoffmann (1988)   |
| CH <sub>3</sub> COCH <sub>3</sub>            | 28.1                                 | 5050.                                       | Sander et al. (2006)            |
| MGLYOX                                       | $3.70 \times 10^3$                   | 7500.                                       | Betterton and Hoffmann (1988)   |
| SO <sub>2</sub>                              | 1.2                                  | 3120.                                       | Chameides (1984)                |
| H <sub>2</sub> SO <sub>4</sub>               | $1. \times 10^{11}$                  | 0.                                          | see note                        |
| CH <sub>3</sub> SO <sub>3</sub> H            | BIG                                  | 0.                                          | see note                        |
| DMS                                          | $5.4 \times 10^{-1}$                 | 3500.                                       | Staudinger and Roberts (2001)   |

Table 3: Henry’s law coefficients (... continued)

| substance | $\frac{k_H^\ominus}{\text{M/atm}}$ | $\frac{-\Delta_{\text{soln}}H/R}{\text{K}}$ | reference               |
|-----------|------------------------------------|---------------------------------------------|-------------------------|
| DMSO      | $5. \times 10^4$                   | 6425.                                       | De Bruyn et al. (1994)* |

## General notes

The value “BIG” corresponds to virtually infinite solubility which is represented in the model using a very large but arbitrary number.

The temperature dependence of the Henry constants is:

$$K_H = K_H^\ominus \times \exp \left( \frac{-\Delta_{\text{soln}}H}{R} \left( \frac{1}{T} - \frac{1}{T^\ominus} \right) \right)$$

where  $\Delta_{\text{soln}}H$  = molar enthalpy of dissolution [J/mol] and  $R = 8.314 \text{ J}/(\text{mol K})$ .

## Specific notes

NO<sub>2</sub>: The temperature dependence is from Chameides (1984).

HNO<sub>3</sub>: Calculated using the acidity constant from Davis and de Bruin (1964).

CH<sub>3</sub>O<sub>2</sub>: This value was estimated by Jacob (1986).

C<sub>2</sub>H<sub>5</sub>O<sub>2</sub>: Assumed to be the same as  $K_H(\text{CH}_3\text{O}_2)$ .

H<sub>2</sub>SO<sub>4</sub>: To account for the very high Henry’s law coefficient of H<sub>2</sub>SO<sub>4</sub>, a very high value was chosen arbitrarily.

DMSO: Lower limit cited from another reference.

Table 4: Accommodation coefficients

| substance                                    | $\alpha^\ominus$      | $\frac{-\Delta_{\text{obs}}H/R}{K}$ | reference                     |
|----------------------------------------------|-----------------------|-------------------------------------|-------------------------------|
| O <sub>2</sub>                               | 0.01                  | 2000.                               | see note                      |
| O <sub>3</sub>                               | 0.002                 | (default)                           | DeMore et al. (1997)*         |
| OH                                           | 0.01                  | (default)                           | Takami et al. (1998)*         |
| HO <sub>2</sub>                              | 0.5                   | (default)                           | Thornton and Abbatt (2005)    |
| H <sub>2</sub> O <sub>2</sub>                | 0.077                 | 3127.                               | Worsnop et al. (1989)         |
| H <sub>2</sub> O                             | 0.0                   | (default)                           | see note                      |
| NH <sub>3</sub>                              | 0.06                  | (default)                           | DeMore et al. (1997)*         |
| NO                                           | $5.0 \times 10^{-5}$  | (default)                           | Saastad et al. (1993)*        |
| NO <sub>2</sub>                              | 0.0015                | (default)                           | Ponche et al. (1993)*         |
| NO <sub>3</sub>                              | 0.04                  | (default)                           | Rudich et al. (1996)*         |
| N <sub>2</sub> O <sub>5</sub>                | (default)             | (default)                           | DeMore et al. (1997)*         |
| HONO                                         | 0.04                  | (default)                           | DeMore et al. (1997)*         |
| HNO <sub>3</sub>                             | 0.5                   | (default)                           | Abbatt and Waschewsky (1998)* |
| HNO <sub>4</sub>                             | (default)             | (default)                           | DeMore et al. (1997)*         |
| CH <sub>3</sub> OH                           | (default)             | (default)                           | see note                      |
| CH <sub>3</sub> O <sub>2</sub>               | 0.01                  | 2000.                               | see note                      |
| CH <sub>3</sub> OOH                          | 0.0046                | 3273.                               | Magi et al. (1997)            |
| CO <sub>2</sub>                              | 0.01                  | 2000.                               | see note                      |
| HCHO                                         | 0.04                  | (default)                           | DeMore et al. (1997)*         |
| HCOOH                                        | 0.014                 | 3978.                               | DeMore et al. (1997)          |
| CH <sub>3</sub> COOH                         | $2.0 \times 10^{-2}$  | 4079.                               | Davidovits et al. (1995)      |
| PAN                                          | (default)             | (default)                           | see note                      |
| C <sub>2</sub> H <sub>5</sub> O <sub>2</sub> | (default)             | (default)                           | see note                      |
| CH <sub>3</sub> CHO                          | $3.0 \times 10^{-2}$  | (default)                           | see note                      |
| GLYOX                                        | (default)             | (default)                           | see note                      |
| HOCH <sub>2</sub> CO <sub>2</sub> H          | (default)             | (default)                           | see note                      |
| HOCH <sub>2</sub> CHO                        | (default)             | (default)                           | see note                      |
| CH <sub>3</sub> COCH <sub>3</sub>            | $3.72 \times 10^{-3}$ | 6395.                               | Davidovits et al. (1995)      |
| MGLYOX                                       | (default)             | (default)                           | see note                      |
| SO <sub>2</sub>                              | 0.11                  | (default)                           | DeMore et al. (1997)          |
| H <sub>2</sub> SO <sub>4</sub>               | 0.65                  | (default)                           | Pöschl et al. (1998)*         |
| CH <sub>3</sub> SO <sub>3</sub> H            | 0.076                 | 1762.                               | De Bruyn et al. (1994)        |
| DMS                                          | (default)             | (default)                           | see note                      |
| DMSO                                         | 0.048                 | 2578.                               | De Bruyn et al. (1994)        |

## General notes

If no data are available, the following default values are used:

$$\alpha^{\ominus} = 0.1$$

$$-\Delta_{\text{obs}}H/R = 0 \text{ K}$$

The temperature dependence of the accommodation coefficients is given by (Jayne et al., 1991):

$$\begin{aligned} \frac{\alpha}{1-\alpha} &= \exp\left(\frac{-\Delta_{\text{obs}}G}{RT}\right) \\ &= \exp\left(\frac{-\Delta_{\text{obs}}H}{RT} + \frac{\Delta_{\text{obs}}S}{R}\right) \end{aligned}$$

where  $\Delta_{\text{obs}}G$  is the Gibbs free energy barrier of the transition state toward solution (Jayne et al., 1991), and  $\Delta_{\text{obs}}H$  and  $\Delta_{\text{obs}}S$  are the corresponding enthalpy and entropy, respectively. The equation can be rearranged to:

$$\ln\left(\frac{\alpha}{1-\alpha}\right) = \frac{-\Delta_{\text{obs}}H}{R} \times \frac{1}{T} + \frac{-\Delta_{\text{obs}}S}{R}$$

and further:

$$\text{d} \ln\left(\frac{\alpha}{1-\alpha}\right) \bigg/ \text{d}\left(\frac{1}{T}\right) = \frac{-\Delta_{\text{obs}}H}{R}$$

## Specific notes

O<sub>2</sub>: Estimate.

O<sub>3</sub>: Value measured at 292 K.

OH: Value measured at 293 K.

NH<sub>3</sub>: Value measured at 295 K.

NO: Value measured between 193 and 243 K.

NO<sub>2</sub>: Value measured at 298 K.

NO<sub>3</sub>: Value is a lower limit, measured at 273 K.

N<sub>2</sub>O<sub>5</sub>: Value for sulfuric acid, measured between 195 and 300 K.

HONO: Value measured between 247 and 297 K.

HNO<sub>3</sub>: Value measured at room temperature. Abbatt and Waschewsky (1998) say  $\gamma > 0.2$ . Here  $\alpha = 0.5$  is used.

HNO<sub>4</sub>: Value measured at 200 K for water ice.

CH<sub>3</sub>O<sub>2</sub>: Estimate.

CO<sub>2</sub>: Estimate.

HCHO: Value measured between 260 and 270 K.

PAN: Estimate.

C<sub>2</sub>H<sub>5</sub>O<sub>2</sub>: Estimate.

CH<sub>3</sub>CHO: Using the same estimate as in the CAPRAM 2.4 model ([http://projects.tropos.de/capram/capram\\_24.html](http://projects.tropos.de/capram/capram_24.html)).

H<sub>2</sub>SO<sub>4</sub>: Value measured at 303 K.

Table 5: Reversible (Henry’s law) equilibria and irreversible (“heterogenous”) uptake

| # | labels | reaction | rate coefficient | reference |
|---|--------|----------|------------------|-----------|
|---|--------|----------|------------------|-----------|

## General notes

The forward (**k<sub>exf</sub>**) and backward (**k<sub>exb</sub>**) rate coefficients are calculated in the file `messy_mecca_aero.f90` using the accommodation coefficients in subroutine `mecca_aero_alpha` and Henry’s law constants in subroutine `mecca_aero_henry`.

For uptake of X (X = N<sub>2</sub>O<sub>5</sub>, ClNO<sub>3</sub>, or BrNO<sub>3</sub>) and subsequent reaction with H<sub>2</sub>O, Cl<sup>−</sup>, and Br<sup>−</sup> in H3201,

H6300, H6301, H6302, H7300, H7301, H7302, H7601, and H7602, we define:

$$k_{\text{exf}}(\text{X}) = \frac{k_{\text{mt}}(\text{X}) \times \text{LWC}}{[\text{H}_2\text{O}] + 5 \times 10^2 [\text{Cl}^-] + 3 \times 10^5 [\text{Br}^-]}$$

Here,  $k_{\text{mt}}$  = mass transfer coefficient, and LWC = liquid water content of the aerosol. The total uptake rate of X is only determined by  $k_{\text{mt}}$ . The factors only affect the branching between hydrolysis and the halide reac-

tions. The factor  $5 \times 10^2$  was chosen such that the chloride reaction dominates over hydrolysis at about  $[\text{Cl}^-] > 0.1 \text{ M}$  (see Fig. 3 in Behnke et al. (1997)), i.e. when the ratio  $[\text{H}_2\text{O}]/[\text{Cl}^-]$  is less than  $5 \times 10^2$ . The ratio  $5 \times 10^2 / 3 \times 10^5$  was chosen such that the reactions with chloride and bromide are roughly equal for sea water composition (Behnke et al., 1994). These ratios were measured for uptake of N<sub>2</sub>O<sub>5</sub>. Here, they are also used for ClNO<sub>3</sub> and BrNO<sub>3</sub>.

Table 6: Heterogeneous reactions

| # | labels | reaction | rate coefficient | reference |
|---|--------|----------|------------------|-----------|
|---|--------|----------|------------------|-----------|

## General notes

Heterogeneous reaction rates are calculated with an external module (e.g., MECCA\_KHET) and then supplied to the MECCA chemistry (see [www.messy-interface.org](http://www.messy-interface.org) for details)

Table 7: Acid-base and other equilibria

| # | labels | reaction | $K_0[M^{m-n}]$ | $-\Delta H/R[K]$ | reference |
|---|--------|----------|----------------|------------------|-----------|
|---|--------|----------|----------------|------------------|-----------|

Specific notes

Table 8: Aqueous phase reactions

| # | labels | reaction | $k_0$ [ $M^{1-n}s^{-1}$ ] | $-E_a/R[K]$ | reference |
|---|--------|----------|---------------------------|-------------|-----------|
|---|--------|----------|---------------------------|-------------|-----------|

**Specific notes**

## References

- Abbatt, J. P. D. and Waschewsky, G. C. G.: Heterogeneous interactions of HOBr, HNO<sub>3</sub>, O<sub>3</sub>, and NO<sub>2</sub> with deliquescent NaCl aerosols at room temperature, *J. Phys. Chem. A*, 102, 3719–3725, 1998.
- Albaladejo, J., Jiménez, E., Notario, A., Cabañas, B., and Martínez, E.: CH<sub>3</sub>O yield in the CH<sub>3</sub> + O<sub>3</sub> reaction using the LP/LIF technique at room temperature, *J. Phys. Chem. A*, 106, 2512–2519, doi:10.1021/jp012249o, 2002.
- Andrews, D. U., Heazlewood, B. R., Maccarone, A. T., Conroy, T., Payne, R. J., Jordan, M. J. T., and Kable, S. H.: Photo-tautomerization of acetaldehyde to vinyl alcohol: a potential route to tropospheric acids, *Science*, 337, 1203–1206, doi:10.1126/science.1220712, 2012.
- Aschmann, S. M., Nishino, N., Arey, J., and Atkinson, R.: Products of the OH radical-initiated reactions of furan, 2- and 3-methylfuran, and 2,3- and 2,5-dimethylfuran in the presence of NO, *J. Phys. Chem. A*, 118, 457–466, doi:10.1021/jp410345k, 2014.
- Atkinson, R.: Gas-phase tropospheric chemistry of volatile organic compounds: 1. Alkanes and alkenes, *J. Phys. Chem. Ref. Data*, 26, 215–290, 1997.
- Atkinson, R.: Kinetics of the gas-phase reactions of OH radicals with alkanes and cycloalkanes, *Atmos. Chem. Phys.*, 3, 2233–2307, 2003.
- Atkinson, R., Baulch, D. L., Cox, R. A., Crowley, J. N., Hampson, R. F., Hynes, R. G., Jenkin, M. E., Rossi, M. J., and Troe, J.: Evaluated kinetic and photochemical data for atmospheric chemistry: Volume I – gas phase reactions of O<sub>x</sub>, HO<sub>x</sub>, NO<sub>x</sub> and SO<sub>x</sub> species, *Atmos. Chem. Phys.*, 4, 1461–1738, 2004.
- Atkinson, R., Baulch, D. L., Cox, R. A., Crowley, J. N., Hampson, R. F., Hynes, R. G., Jenkin, M. E., Rossi, M. J., Troe, J., and IUPAC Subcommittee: Evaluated kinetic and photochemical data for atmospheric chemistry: Volume II – gas phase reactions of organic species, *Atmos. Chem. Phys.*, 6, 3625–4055, 2006.
- Baeza-Romero, M. T., Glowacki, D. R., Blitz, M. A., Heard, D., Pilling, M. J., Rickard, A. R., and Seakins, P. W.: A combined experimental and theoretical study of the reaction between methylglyoxal and OH/OD radical: OH regeneration, *Phys. Chem. Chem. Phys.*, 9, 4114–4128, doi:10.1039/b702916k, 2007.
- Banic, C. M., Beauchamp, S. T., Tordon, R. J., Schroeder, W. H., Steffen, A., Anlauf, K. A., and Wong, H. K. T.: Vertical distribution of gaseous elemental mercury in Canada, *J. Geophys. Res.*, 108D, 4264, doi:10.1029/2002JD002116, 2003.
- Barnes, I., Becker, K. H., Fink, E. H., Reimer, A., Zabel, F., and Niki, H.: FTIR spectroscopic study of the gas-phase reaction of HO<sub>2</sub> with H<sub>2</sub>CO, *Chem. Phys. Lett.*, 115, 1–8, doi:10.1016/0009-2614(85)80091-9, 1985.
- Barnes, I., Becker, K. H., and Zhu, T.: Near UV absorption-spectra and photolysis products of difunctional organic nitrates - possible importance as NO<sub>x</sub> reservoirs, *J. Atmos. Chem.*, 17, 353–373, 1993.
- Barone, S. B., Turnipseed, A. A., and Ravishankara, A. R.: Role of adducts in the atmospheric oxidation of dimethyl sulfide, *Faraday Discuss.*, 100, 39–54, 1995.
- Bates, K. H., Crounse, J. D., St. Clair, J. M., Bennett, N. B., Nguyen, T. B., Seinfeld, J. H., Stoltz, B. M., and Wennberg, P. O.: Gas phase production and loss of isoprene epoxydiols, *J. Phys. Chem. A*, 118, 1237–1246, doi:10.1021/jp4107958, 2014.
- Baulch, D. L., Bowman, C. T., Cobos, C. J., Cox, R. A., Just, T., Kerr, J. A., Pilling, M. J., Stocker, D., Troe, J., Tsang, W., Walker, R. W., and Warnatz, J.: Evaluated kinetic data for combustion modeling: Supplement II, *J. Phys. Chem. Ref. Data*, 34, 757–1397, 2005.
- Becker, K. H., Kurtenbach, R., Schmidt, F., and Wiesen, P.: Kinetics of the NCO radical reacting with atoms and selected molecules, *Combust. Flame*, 120, 570–577, doi:10.1016/S0010-2180(99)00108-X, 2000.
- Behnke, W., Scheer, V., and Zetzsch, C.: Production of BrNO<sub>2</sub>, Br<sub>2</sub> and ClNO<sub>2</sub> from the reaction between sea spray aerosol and N<sub>2</sub>O<sub>5</sub>, *J. Aerosol Sci.*, 25, S277–S278, 1994.
- Behnke, W., George, C., Scheer, V., and Zetzsch, C.: Production and decay of ClNO<sub>2</sub> from the reaction of gaseous N<sub>2</sub>O<sub>5</sub> with NaCl solution: Bulk and aerosol experiments, *J. Geophys. Res.*, 102D, 3795–3804, 1997.
- Betterton, E. A. and Hoffmann, M. R.: Henry’s law constants of some environmentally important aldehydes, *Environ. Sci. Technol.*, 22, 1415–1418, 1988.
- Beyersdorf, A. J., Blake, D. R., Swanson, A., Meinardi, S., Rowland, F. S., and Davis, D.: Abundances and variability of tropospheric volatile organic compounds at the South Pole and other Antarctic locations, *Atmos. Environ.*, 44, 4565–4574, doi:10.1016/j.atmosenv.2010.08.025, 2010.
- Birdsall, A. W., Andreoni, J. F., and Elrod, M. J.: Investigation of the role of bicyclic peroxy radicals in the oxidation mechanism of toluene, *J. Phys. Chem. A*, 114, 10 655–10 663, doi:10.1021/jp105467e, 2010.

- Bossolasco, A., Faragó, E. P., Schoemaeker, C., and Fittschen, C.: Rate constant of the reaction between  $\text{CH}_3\text{O}_2$  and OH radicals, *Chem. Phys. Lett.*, 593, 7–13, doi:10.1016/j.cplett.2013.12.052, 2014.
- Brimblecombe, P. and Clegg, S. L.: Erratum, *J. Atmos. Chem.*, 8, 95, 1989.
- Buras, Z. J., Elsamra, R. M. I., and Green, W. H.: Direct determination of the simplest Criegee intermediate ( $\text{CH}_2\text{OO}$ ) self reaction rate, *J. Phys. Chem. Lett.*, 5, 2224–2228, doi:10.1021/jz5008406, 2014.
- Butkovskaya, N., Kukui, A., and Le Bras, G.: Pressure and temperature dependence of ethyl nitrate formation in the  $\text{C}_2\text{H}_5\text{O}_2 + \text{NO}$  reaction, *J. Phys. Chem. A*, 114, 956–964, doi:10.1021/jp910003a, 2010.
- Butkovskaya, N., Kukui, A., and Le Bras, G.: Pressure and temperature dependence of methyl nitrate formation in the  $\text{CH}_3\text{O}_2 + \text{NO}$  reaction, *J. Phys. Chem. A*, 116, 5972–5980, doi:10.1021/jp210710d, 2012.
- Canosa-Mas, C. E., King, M. D., Lopez, R., Percival, C. J., Wayne, R. P., Shallcross, D. E., Pyle, J. A., and Daele, V.: Is the reaction between  $\text{CH}_3(\text{O})\text{O}_2$  and  $\text{NO}_3$  important in the night-time troposphere?, *J. Chem. Soc. Faraday Trans.*, 92, 2211–2222, 1996.
- Capouet, M., Müller, J.-F., Ceulemans, K., Compernelle, S., Vereecken, L., and Peeters, J.: Modeling aerosol formation in alpha-pinene photo-oxidation experiments, *J. Geophys. Res.*, 8, doi:10.1029/2007JD008995, 2008.
- Chai, J., Hu, H., Dibble, T. S., Tyndall, G. S., and Orlando, J. J.: Rate constants and kinetic isotope effects for methoxy radical reacting with  $\text{NO}_2$  and  $\text{O}_2$ , *J. Phys. Chem. A*, 118, 3552–3563, doi:10.1021/jp501205d, 2014.
- Chameides, W. L.: The photochemistry of a remote marine stratiform cloud, *J. Geophys. Res.*, 89D, 4739–4755, 1984.
- Chao, W., Hsieh, J.-T., Chang, C.-H., and Lin, J. J.-M.: Direct kinetic measurement of the reaction of the simplest Criegee intermediate with water vapor, *Science*, 347, 751–754, doi:10.1126/science.1261549, 2015.
- Chen, J., Wenger, J. C., and Venables, D. S.: Near-ultraviolet absorption cross sections of nitrophenols and their potential influence on tropospheric oxidation capacity, *J. Phys. Chem. A*, 115, 12 235–12 242, doi:10.1021/jp206929r, 2011.
- Christensen, L. E., Okumura, M., Sander, S. P., Salawitch, R. J., Toon, G. C., Sen, B., Blavier, J.-F., and Jucks, K. W.: Kinetics of  $\text{HO}_2 + \text{HO}_2 \rightarrow \text{H}_2\text{O}_2 + \text{O}_2$ : Implications for stratospheric  $\text{H}_2\text{O}_2$ , *Geophys. Res. Lett.*, 29, doi:10.1029/2001GL014525, 2002.
- Clubb, A. E., Jordan, M. J. T., Kable, S. H., and Osborn, D. L.: Phototautomerization of acetaldehyde to vinyl alcohol: a primary process in UV-irradiated acetaldehyde from 295 to 335 nm, *J. Phys. Chem. Lett.*, 3, 3522–3526, doi:10.1021/jz301701x, 2012.
- Conn, J. B., Kistiakowsky, G. B., Roberts, R. M., and Smith, E. A.: Heats of organic reactions. XIII. Heats of hydrolysis of some acid anhydrides, *Journal of the American Chemical Society*, 64, 1747–1752, doi:10.1021/ja01260a001, 1942.
- Davidovits, P., Hu, J. H., Worsnop, D. R., Zahniser, M. S., and Kolb, C. E.: Entry of gas molecules into liquids, *Faraday Discuss.*, 100, 65–81, 1995.
- Davis, D., Chen, G., Kasibhatla, P., Jefferson, A., Tanner, D., Eisele, F., Lenschow, D., Neff, W., and Berresheim, H.: DMS oxidation in the Antarctic marine boundary layer: Comparison of model simulations and field observations of DMS, DMSO,  $\text{DMSO}_2$ ,  $\text{H}_2\text{SO}_4(\text{g})$ ,  $\text{MSA}(\text{g})$ , and  $\text{MSA}(\text{p})$ , *J. Geophys. Res.*, 103D, 1657–1678, 1998.
- Davis, Jr., W. and de Bruin, H. J.: New activity coefficients of 0–100 per cent aqueous nitric acid, *J. Inorg. Nucl. Chem.*, 26, 1069–1083, 1964.
- daSilva, G.: Carboxylic acid catalyzed keto-enol tautomerizations in the gas phase, *Angew. Chem.*, 122, 7685–7687, doi:10.1002/ange.201003530, 2010.
- De Bruyn, W. J., Shorter, J. A., Davidovits, P., Worsnop, D. R., Zahniser, M. S., and Kolb, C. E.: Uptake of gas-phase sulfur species methanesulfonic acid, dimethylsulfoxide, and dimethyl sulfone by aqueous surfaces, *J. Geophys. Res.*, 99D, 16 927–16 932, 1994.
- DeMore, W. B., Sander, S. P., Golden, D. M., Hampson, R. F., Kurylo, M. J., Howard, C. J., Ravishankara, A. R., Kolb, C. E., and Molina, M. J.: Chemical kinetics and photochemical data for use in stratospheric modeling. Evaluation number 12, JPL Publication 97-4, Jet Propulsion Laboratory, Pasadena, CA, 1997.
- Feierabend, K. J., Zhu, L., Talukdar, R. K., and Burkholder, J. B.: Rate coefficients for the  $\text{OH} + \text{HC}(\text{O})\text{C}(\text{O})\text{H}$  (glyoxal) reaction between 210 and 390 K, *J. Phys. Chem. A*, 112, 73–82, 2008.
- Flocke, F., Atlas, E., Madronich, S., Schauffler, S. M., Aikin, K., Margitan, J. J., and Bui, T. P.: Observations of methyl nitrate in the lower stratosphere during STRAT: implications for its gas phase production mechanisms, *Geophys. Res. Lett.*, 25, 1891–1894, 1998.

- Francisco-Marquez, M., Alvarez-Idaboy, J. R., Galano, A., and Vivier-Bunge, A.: Theoretical study of the initial reaction between OH and isoprene in tropospheric conditions, *Phys. Chem. Chem. Phys.*, 5, 1392–1399, doi:10.1039/B211185C, 2003.
- Ganzeveld, L., Klemm, O., Rappenglück, B., and Valverde-Canossa, J.: Evaluation of meteorological parameters over a coniferous forest in a single-column chemistry-climate model, *Atmos. Environ.*, 40, S21–S27, 2006.
- Gill, K. J. and Hites, R. A.: Rate constants for the gas-phase reactions of the hydroxyl radical with isoprene,  $\alpha$ - and  $\beta$ -pinene, and limonene as a function of temperature, *J. Phys. Chem. A*, 106, 2538–2544, doi:10.1021/jp013532q, 2002.
- Glowacki, D. R., Lockhart, J., Blitz, M. A., Klippenstein, S. J., Pilling, M. J., Robertson, S. H., and Seakins, P. W.: Interception of excited vibrational quantum states by O<sub>2</sub> in atmospheric association reactions, *Science*, 337, 1066–1069, doi:10.1126/science.1224106, 2012.
- Grenfell, J. L., Lehmann, R., Mieth, P., Langematz, U., and Steil, B.: Chemical reaction pathways affecting stratospheric and mesospheric ozone, *J. Geophys. Res.*, 111D, doi:10.1029/2004JD005713, 2006.
- Groß, C. B. M., Dillon, T. J., Schuster, G., Lelieveld, J., and Crowley, J. N.: Direct kinetic study of OH and O<sub>3</sub> formation in the Reaction of CH<sub>3</sub>C(O)O<sub>2</sub> with HO<sub>2</sub>, *J. Phys. Chem. A*, 1, 974–985, doi:10.1021/jp412380z, 2014.
- Gruzdev, A. N., Elokhov, A. S., Makarov, O. V., and Mokhov, I. I.: Some recent results of Russian measurements of surface ozone in Antarctica. A meteorological interpretation, *Tellus*, 45B, 99–105, 1993.
- Hanson, D. R., Burkholder, J. B., Howard, C. J., and Ravishankara, A. R.: Measurement of OH and HO<sub>2</sub> radical uptake coefficients on water and sulfuric acid surfaces, *J. Phys. Chem.*, 96, 4979–4985, 1992.
- Hatakeyama, S., Honda, S., and Akimoto, H.: Rate constants and mechanism for reactions of ketenes with OH radicals in air at 299±2 K, *Bull. Chem. Soc. Jpn.*, 58, 2157–2162, 1985.
- Hermans, I., Müller, J.-F., Nguyen, T. L., Jacobs, P. A., and Peeters, J.: Kinetics of  $\alpha$ -hydroxy-alkylperoxyl radicals in oxidation processes. HO<sub>2</sub>-initiated oxidation of ketones/aldehydes near the tropopause, *J. Phys. Chem. A*, 109, 4303–4311, doi:10.1021/jp044080v, 2005.
- Hynes, A. J. and Wine, P. H.: The atmospheric chemistry of dimethylsulfoxide (DMSO) kinetics and mechanism of the OH + DMSO reaction, *J. Atmos. Chem.*, 24, 23–37, 1996.
- Ip, H. S. S., Huang, X. H. H., and Yu, J. Z.: Effective Henry’s law constants of glyoxal, glyoxylic acid, and glycolic acid, *Geophys. Res. Lett.*, 36, L01802, doi:10.1029/2008GL036212, 2009.
- Jacob, D. J.: Chemistry of OH in remote clouds and its role in the production of formic acid and peroxy-monosulfate, *J. Geophys. Res.*, 91D, 9807–9826, 1986.
- Jagiella, S. and Zabel, F.: Reaction of phenylperoxy radicals with NO<sub>2</sub> at 298 K, *Phys. Chem. Chem. Phys.*, 9, 5036–5051, doi:10.1039/B705193J, 2007.
- Jayne, J. T., Duan, S. X., Davidovits, P., Worsnop, D. R., Zahniser, M. S., and Kolb, C. E.: Uptake of gas-phase alcohol and organic acid molecules by water surfaces, *J. Phys. Chem.*, 95, 6329–6336, 1991.
- Jenkin, M., Saunders, S. M., and Pilling, M. J.: The tropospheric degradation of volatile organic compounds: A protocol for mechanism development, *Atmos. Environ.*, 31, 81–104, 1997.
- Jenkin, M. E., Young, J. C., and Rickard, A. R.: The MCM v3.3 degradation scheme for isoprene, *Atmos. Chem. Phys. Discuss.*, 15, 9709–9766, doi:10.5194/acpd-15-9709-2015, 2015.
- Kircher, C. C. and Sander, S. P.: Kinetics and mechanism of HO<sub>2</sub> and DO<sub>2</sub> disproportionations, *J. Phys. Chem.*, 88, 2082–2091, 1984.
- Kirchner, F., Mayer-Figge, A., Zabel, F., and Becker, K. H.: Thermal stability of peroxy-nitrates, *Int. J. Chem. Kinetics*, 31, 127–144, doi:10.1002/(SICI)1097-4601(1999)31:2<127::AID-KIN6>3.0.CO;2-L, 1999.
- Kleinböhl, A., Toon, G. C., Sen, B., Blavier, J.-F. L., Weisenstein, D. K., Strekowski, R. S., Nicovich, J. M., Wine, P. H., and Wennberg, P. O.: On the stratospheric chemistry of hydrogen cyanide, *Geophys. Res. Lett.*, 33, doi:10.1029/2006GL026015, 2006.
- Kohlmann, J.-P. and Poppe, D.: The tropospheric gas-phase degradation of NH<sub>3</sub> and its impact on the formation of N<sub>2</sub>O and NO<sub>x</sub>, *J. Atmos. Chem.*, 32, 397–415, 1999.
- Lee, Y.-N. and Schwartz, S. E.: Reaction kinetics of nitrogen dioxide with liquid water at low partial pressure, *J. Phys. Chem.*, 85, 840–848, 1981.
- Lewis, T. R., Blitz, M. A., Heard, D. E., and Seakins, P. W.: Direct evidence for a substantive reaction between the Criegee intermediate, CH<sub>2</sub>OO, and the water vapour dimer, *Phys. Chem. Chem. Phys.*, 17, 4859–4863, doi:10.1039/C4CP04750H, 2015.

- Liljegren, J. A. and Stevens, P. S.: Measurements of the kinetics of the reaction of OH radicals with 3-methylfuran at low pressure, *Int. J. Chem. Kinetics*, 45, 787–794, 2013.
- Lind, J. A. and Kok, G. L.: Correction to “Henry’s law determinations for aqueous solutions of hydrogen peroxide, methylhydroperoxide, and peroxyacetic acid” by John A. Lind and Gregory L. Kok, *J. Geophys. Res.*, 99D, 21 119, 1994.
- Lockhart, J., Blitz, M., Heard, D., Seakins, P., and Shannon, R.: Kinetic study of the OH + glyoxal reaction: experimental evidence and quantification of direct OH recycling, *J. Phys. Chem. A*, 117, 11 027–11 037, doi:10.1021/jp4076806, 2013.
- Lockwood, A. L., Shepson, P. B., Fiddler, M. N., and Alaghmand, M.: Isoprene nitrates: preparation, separation, identification, yields, and atmospheric chemistry, *Atmos. Chem. Phys.*, 10, 6169–6178, doi:10.5194/acp-10-6169-2010, 2010.
- Magi, L., Schweitzer, F., Pallares, C., Cherif, S., Mirabel, P., and George, C.: Investigation of the uptake rate of ozone and methyl hydroperoxide by water surfaces, *J. Phys. Chem. A*, 101, 4943–4949, 1997.
- McCabe, D. C., Gierczak, T., Talukdar, R. K., and Ravishankara, A. R.: Kinetics of the reaction OH + CO under atmospheric conditions, *Geophys. Res. Lett.*, 28, 3135–3138, 2001.
- Mellouki, A. and Mu, Y.: On the atmospheric degradation of pyruvic acid in the gas phase, *J. Photochem. Photobiol. A: Chem.*, 157, doi:10.1016/S1010-6030(03)00070-4, 2003.
- Messaadia, L., Dib, G. E., Ferhati, A., and Chakir, A.: UV-visible spectra and gas-phase rate coefficients for the reaction of 2,3-pentanedione and 2,4-pentanedione with OH radicals, *Chem. Phys. Lett.*, 626, 73–79, doi:10.1016/j.cplett.2015.02.032, 2015.
- Müller, J.-F., Peeters, J., and Stavrou, T.: Fast photolysis of carbonyl nitrates from isoprene, *Atmos. Chem. Phys.*, 14, 2497–2508, doi:10.5194/acp-14-2497-2014, 2014.
- Munger, J. W., Jacob, D. J., Fan, S.-M., Colman, A. S., and Dibb, J. E.: Concentrations and snow-atmosphere fluxes of reactive nitrogen at Summit, Greenland, *J. Geophys. Res.*, 104D, 13 721–13 734, 1999.
- Nakanishi, H., Morita, H., and Nagakura, S.: Electronic structures and spectra of the keto and enol forms of acetylacetone, *Bull. Chem. Soc. Jpn.*, 50, 2255–2261, doi:10.1246/bcsj.50.2255, 1977.
- Nguyen, T. L., Peeters, J., and Vereecken, L.: Theoretical study of the gas-phase ozonolysis of  $\beta$ -pinene ( $C_{10}H_{16}$ ), *Phys. Chem. Chem. Phys.*, 11, 5643–5656, doi:10.1039/b822984h, 2009.
- Nielsen, O. J., Sidebottom, H. W., Donlon, M., and Treacy, J.: Rate constants for the gas-phase reactions of OH radicals and Cl atoms with n-alkyl nitrites at atmospheric pressure and 298 K, *Int. J. Chem. Kinetics*, 23, 1095–1109, doi:10.1002/kin.550231204, 1991.
- Ogryzlo, E. A., Paltenghi, R., and Bayes, K. D.: The rate of reaction of methyl radicals with ozone, *Int. J. Chem. Kinetics*, 13, 667–675, doi:10.1002/kin.550130707, 1981.
- Olzmann, M., Kraka, E., Cremer, D., Gutbrod, R., and Andersson, S.: Energetics, kinetics, and product distributions of the reactions of ozone with ethene and 2,3-dimethyl-2-butene, *J. Phys. Chem. A*, 101, 9421–9429, 1997.
- Orlando, J. J. and Tyndall, G. S.: The atmospheric chemistry of the HC(O)CO radical, *Int. J. Chem. Kinetics*, 33, 149–156, 2001.
- Orlando, J. J. and Tyndall, G. S.: Laboratory studies of organic peroxy radical chemistry: an overview with emphasis on recent issues of atmospheric significance, *Chem. Soc. Rev.*, 41, 6294–6317, doi:10.1039/C2CS35166H, 2012.
- Orlando, J. J., Tyndall, G. S., Bilde, M., Ferronato, C., Wallington, T. J., Vereecken, L., and Peeters, J.: Laboratory and theoretical study of the oxy radicals in the OH- and Cl-initiated oxidation of ethene, *J. Phys. Chem. A*, 102, 8116–8123, 1998.
- Orlando, J. J., Tyndall, G. S., Fracheboud, J. M., Estupinan, E. G., Haberkorn, S., and Zimmer, A.: The rate and mechanism of the gas-phase oxidation of hydroxyacetone, *Atmos. Environ.*, 33, 1621–1629, 1999a.
- Orlando, J. J., Tyndall, G. S., and Paulson, S. E.: Mechanism of the OH-initiated oxidation of methacrolein, *Geophys. Res. Lett.*, 26, 2191–2194, 1999b.
- Orlando, J. J., Tyndall, G. S., Bertman, S. B., Chen, W., and Burkholder, J. B.: Rate coefficient for the reaction of OH with  $CH_2=C(CH_3)C(O)OONO_2$  (MPAN), *Atmos. Environ.*, 36, 1895–1900, 2002.
- Ouyang, B., McLeod, M. W., Jones, R. L., and Bloss, W. J.:  $NO_3$  radical production from the reaction between the Criegee intermediate  $CH_2OO$  and  $NO_2$ , *Phys. Chem. Chem. Phys.*, 15, 17 070–17 075, doi:10.1039/c3cp53024h, 2013.
- Paulot, F., Crounse, J. D., Kjaergaard, H. G., Kroll, J. H., Seinfeld, J. H., and Wennberg, P. O.: Isoprene

- photooxidation: new insights into the production of acids and organic nitrates, *Atmos. Chem. Phys.*, 9, 1479–1501, 2009a.
- Paulot, F., Crounse, J. D., Kjaergaard, H. G., Kürten, A., St. Clair, J. M., Seinfeld, J. H., and Wennberg, P. O.: Unexpected epoxide formation in the gas-phase photooxidation of isoprene, *Science*, 325, doi:10.1126/science.1172910, 2009b.
- Paulot, F., Wunch, D., Crounse, J. D., Toon, G. C., Millet, D. B., DeCarlo, P. F., Vigouroux, C., Deutscher, N. M., González Abad, G., Notholt, J., Warneke, T., Hannigan, J. W., Warneke, C., de Gouw, J. A., Dunlea, E. J., De Mazière, M., Griffith, D. W. T., Bernath, P., Jimenez, J. L., and Wennberg, P. O.: Importance of secondary sources in the atmospheric budgets of formic and acetic acids, *Atmos. Chem. Phys.*, 11, 1989–2013, doi:10.5194/acp-11-1989-2011, 2011.
- Peeters, J. and Nguyen, T. L.: Unusually fast 1,6-H shifts of enolic hydrogens in peroxy radicals: formation of the first-generation C<sub>2</sub> and C<sub>3</sub> carbonyls in the oxidation of isoprene, *J. Phys. Chem. A*, 116, 6134–6141, doi:10.1021/jp211447q, 2012.
- Peeters, J., Müller, J.-F., Stavrou, T., and Nguyen, V. S.: Hydroxyl radical recycling in isoprene oxidation driven by hydrogen bonding and hydrogen tunneling: the upgraded LIM1 mechanism, *J. Phys. Chem. A*, 118, 8625–8643, doi:10.1021/jp5033146, 2014.
- Platz, J., Nielsen, O. J., Wallington, T. J., Ball, J. C., Hurley, M. D., Straccia, A. M., Schneider, W. F., and Sehested, J.: Atmospheric chemistry of the phenoxy radical, C<sub>6</sub>H<sub>5</sub>O(·): UV spectrum and kinetics of its reaction with NO, NO<sub>2</sub>, and O<sub>2</sub>, *J. Phys. Chem. A*, 102, 7964–7974, doi:10.1021/jp982221l, 1998.
- Ponche, J. L., George, C., and Mirabel, P.: Mass transfer at the air/water interface: Mass accommodation coefficients of SO<sub>2</sub>, HNO<sub>3</sub>, NO<sub>2</sub> and NH<sub>3</sub>, *J. Atmos. Chem.*, 16, 1–21, 1993.
- Pöschl, U., Canagaratna, M., Jayne, J. T., Molina, L. T., Worsnop, D. R., Kolb, C. E., and Molina, M. J.: Mass accommodation coefficient of H<sub>2</sub>SO<sub>4</sub> vapor on aqueous sulfuric acid surfaces and gaseous diffusion coefficient of H<sub>2</sub>SO<sub>4</sub> in N<sub>2</sub>/H<sub>2</sub>O, *J. Phys. Chem. A*, 102, 10 082–10 089, 1998.
- Régimbal, J.-M. and Mozurkewich, M.: Peroxynitric acid decay mechanisms and kinetics at low pH, *J. Phys. Chem. A*, 101, 8822–8829, 1997.
- Rickard, A. and Pascoe, S.: The Master Chemical Mechanism (MCM), <http://mcm.leeds.ac.uk>, 2009.
- Rickard, A. R., Johnson, D., McGill, C. D., and Marston, G.: OH yields in the gas-phase reactions of ozone with alkenes, *J. Phys. Chem. A*, 103, 7656–7664, 1999.
- Roth, E., Chakir, A., and Ferhati, A.: Study of a benzoylperoxy radical in the gas phase: ultraviolet spectrum and C<sub>6</sub>H<sub>5</sub>C(O)O<sub>2</sub> + HO<sub>2</sub> reaction between 295 and 357 K, *J. Phys. Chem. A*, 114, 10 367–10 379, doi:10.1021/jp1021467, 2010.
- Rudich, Y., Talukdar, R. K., Imamura, T., Fox, R. W., and Ravishankara, A. R.: Uptake of NO<sub>3</sub> on KI solutions: Rate coefficient for the NO<sub>3</sub> + I<sup>−</sup> reaction and gas-phase diffusion coefficients for NO<sub>3</sub>, *Chem. Phys. Lett.*, 261, 467–473, 1996.
- Saastad, O. W., Ellermann, T., and Nielsen, C. J.: On the adsorption of NO and NO<sub>2</sub> on cold H<sub>2</sub>O/H<sub>2</sub>SO<sub>4</sub> surfaces, *Geophys. Res. Lett.*, 20, 1191–1193, 1993.
- Sander, R., Jöckel, P., Kirner, O., Kunert, A. T., Landgraf, J., and Pozzer, A.: The photolysis module JVAL-14, compatible with the MESSy standard, and the JVal PreProcessor (JVPP), *Geosci. Model Dev.*, 7, 2653–2662, <http://www.geosci-model-dev.net/7/2653>, 2014.
- Sander, S. P., Friedl, R. R., Golden, D. M., Kurylo, M. J., Moortgat, G. K., Keller-Rudek, H., Wine, P. H., Ravishankara, A. R., Kolb, C. E., Molina, M. J., Finlayson-Pitts, B. J., Huie, R. E., and Orkin, V. L.: Chemical Kinetics and Photochemical Data for Use in Atmospheric Studies, Evaluation Number 15, JPL Publication 06-2, Jet Propulsion Laboratory, Pasadena, CA, <http://jpldataeval.jpl.nasa.gov>, 2006.
- Sander, S. P., Abbatt, J., Barker, J. R., Burkholder, J. B., Friedl, R. R., Golden, D. M., Huie, R. E., Kolb, C. E., Kurylo, M. J., Moortgat, G. K., Orkin, V. L., and Wine, P. H.: Chemical Kinetics and Photochemical Data for Use in Atmospheric Studies, Evaluation No. 17, JPL Publication 10-6, Jet Propulsion Laboratory, Pasadena, <http://jpldataeval.jpl.nasa.gov>, 2011.
- Schwartz, S. E. and White, W. H.: Solubility equilibria of the nitrogen oxides and oxyacids in dilute aqueous solution, in: *Advances in Environmental Science and Engineering*, edited by Pfafflin, J. R. and Ziegler, E. N., vol. 4, pp. 1–45, Gordon and Breach Science Publishers, NY, 1981.
- Scribano, Y., Goldman, N., Saykally, R. J., and Leforrestier, C.: Water dimers in the atmosphere III: Equilibrium constant from a flexible potential, *J. Phys. Chem. A*, 110, 5411–5419, doi:10.1021/jp056759k, 2006.

- Sehested, J., Christensen, L. K., Nielsen, O. J., Bilde, M., Wallington, T. J., Schneider, W. F., Orlando, J. J., and Tyndall, G. S.: Atmospheric chemistry of acetone: Kinetic study of the  $\text{CH}_3\text{C}(\text{O})\text{CH}_2\text{O}_2 + \text{NO}/\text{NO}_2$  reactions and decomposition of  $\text{CH}_3\text{C}(\text{O})\text{CH}_2\text{O}_2\text{NO}_2$ , *Int. J. Chem. Kinetics*, 30, 475–489, doi:10.1002/(SICI)1097-4601(1998)30:7<475::AID-KIN4>3.0.CO;2-P, 1998.
- Sivakumaran, V., Hölscher, D., Dillon, T. J., and Crowley, J. N.: Reaction between OH and HCHO: temperature dependent rate coefficients (202–399 K) and product pathways (298 K), *Phys. Chem. Chem. Phys.*, 5, 4821–4827, 2003.
- Snider, J. R. and Dawson, G. A.: Tropospheric light alcohols, carbonyls, and acetonitrile: Concentrations in the southwestern United States and Henry’s law data, *J. Geophys. Res.*, 90D, 3797–3805, 1985.
- So, S., Wille, U., and da Silva, G.: Atmospheric chemistry of enols: a theoretical study of the vinyl alcohol + OH + O<sub>2</sub> reaction mechanism, *Environ. Sci. Technol.*, 48, 6694–6701, doi:10.1021/es500319q, 2014.
- Solberg, S., Stordal, F., and Hov, Ø.: Tropospheric ozone at high latitudes in clean and polluted air masses, a climatological study, *J. Atmos. Chem.*, 28, 111–123, 1997.
- Staudinger, J. and Roberts, P. V.: A critical compilation of Henry’s law constant temperature dependence relations for organic compounds in dilute aqueous solutions, *Chemosphere*, 44, 561–576, 2001.
- Stone, D., Blitz, M., Daubney, L., Howes, N. U. M., and Seakins, P.: Kinetics of  $\text{CH}_2\text{OO}$  reactions with SO<sub>2</sub>, NO<sub>2</sub>, NO, H<sub>2</sub>O and CH<sub>3</sub>CHO as a function of pressure, *Phys. Chem. Chem. Phys.*, 16, 1139–1149, doi:10.1039/c3cp54391a, 2014.
- Strekowski, R. S., Nicovich, J. M., and Wine, P. H.: Kinetic and mechanistic study of the Reactions of O(<sup>1</sup>D<sub>2</sub>) with HCN and CH<sub>3</sub>CN, *Chem. Phys. Chem.*, 11, 3942–3955, doi:10.1002/cphc.201000550, 2010.
- T. J. Wallington et al.: IUPAC Task group on atmospheric chemical kinetic data evaluation: Evaluated kinetic data, <http://iupac.pole-ether.fr>, 2014.
- Takami, A., Kato, S., Shimono, A., and Koda, S.: Uptake coefficient of OH radical on aqueous surface, *Chem. Phys.*, 231, 215–227, 1998.
- Tao, Z. and Li, Z.: A kinetics study on reactions of C<sub>6</sub>H<sub>5</sub>O with C<sub>6</sub>H<sub>5</sub>O and O<sub>3</sub> at 298 K, *Int. J. Chem. Kinetics*, 31, 65–72, doi:10.1002/(SICI)1097-4601(1999)31:1<65::AID-KIN8>3.0.CO;2-J, 1999.
- Taraborrelli, D.: Isoprene oxidation and its impacts on the atmospheric composition, Ph.D. thesis, Johannes Gutenberg-Universität, Mainz, Germany, <http://d-nb.info/1003538770/34>, 2010.
- Taraborrelli, D.: The Mainz Organics Mechanism (MOM), *Geosci. Model Dev.*, (in preparation), 2016.
- Taraborrelli, D., Lawrence, M. G., Butler, T. M., Sander, R., and Lelieveld, J.: Mainz Isoprene Mechanism 2 (MIM2): an isoprene oxidation mechanism for regional and global atmospheric modelling, *Atmos. Chem. Phys.*, 9, 2751–2777, <http://www.atmos-chem-phys.net/9/2751>, 2009.
- Thomas, K., Volz-Thomas, A., and Kley, D.: Zur Wechselwirkung von NO<sub>3</sub>-Radikalen mit wässrigen Lösungen: Bestimmung des Henry- und des Massennakkomodationskoeffizienten, Ph.D. thesis, Institut für Chemie und Dynamik der Geosphäre 2, Forschungszentrum Jülich GmbH, Germany, 1993.
- Thornton, J. and Abbatt, J. P. D.: Measurements of HO<sub>2</sub> uptake to aqueous aerosol: Mass accommodation coefficients and net reactive loss, *J. Geophys. Res.*, 110D, doi:10.1029/2004JD005402, 2005.
- Tyndall, G. S., Staffelbach, T. A., Orlando, J. J., and Calvert, J. G.: Rate coefficients for the reactions of OH radicals with methylglyoxal and acetaldehyde, *Int. J. Chem. Kinetics*, 27, 1009–1020, 1995.
- Tyndall, G. S., Cox, R. A., Granier, C., Lesclaux, R., Moortgat, G. K., Pilling, M. J., Ravishankara, A. R., and Wallington, T. J.: The atmospheric chemistry of small organic peroxy radicals, *J. Geophys. Res.*, 106D, 12 157–12 182, 2001a.
- Tyndall, G. S., Orlando, J. J., Wallington, T. J., and Hurley, M. D.: Products of the chlorine-atom- and hydroxyl-radical-initiated oxidation of CH<sub>3</sub>CN, *J. Phys. Chem. A*, 105, 5380–5384, doi:10.1021/jp004318p, 2001b.
- Vereecken, L. and Francisco, J. S.: Theoretical studies of atmospheric reaction mechanisms in the troposphere, *Chem. Soc. Rev.*, 41, 6259–6293, doi:10.1039/c2cs35070j, 2012.
- Vereecken, L. and Peeters, J.: A theoretical study of the OH-initiated gas-phase oxidation mechanism of  $\beta$ -pinene (C<sub>10</sub>H<sub>16</sub>): first generation products, *Phys. Chem. Chem. Phys.*, 14, 3802–3815, doi:10.1039/c2cp23711c, 2012.
- Vereecken, L., Müller, J.-F., and Peeters, J.: Low-volatility poly-oxygenates in the OH-initiated atmospheric oxidation of  $\alpha$ -pinene: impact of non-traditional peroxy radical chemistry, *Phys. Chem. Chem. Phys.*, 9, 5241–5248, doi:10.1039/b708023a, 2007.

- Vereecken, L., Harder, H., and Novelli, A.: The reaction of Criegee intermediates with NO, RO<sub>2</sub>, and SO<sub>2</sub>, and their fate in the atmosphere, *Phys. Chem. Chem. Phys.*, 14, 14682–14695, doi:10.1039/c2cp42300f, 2012.
- Vereecken, L., Harder, H., and Novelli, A.: The reactions of Criegee intermediates with alkenes, ozone, and carbonyl oxides, *Phys. Chem. Chem. Phys.*, 16, 4039–4049, doi:10.1039/c3cp54514h, 2014.
- von Kuhlmann, R.: Tropospheric photochemistry of ozone, its precursors and the hydroxyl radical: A 3D-modeling study considering non-methane hydrocarbons, Ph.D. thesis, Johannes Gutenberg-Universität, Mainz, Germany, 2001.
- von Kuhlmann, R., Lawrence, M. G., Crutzen, P. J., and Rasch, P. J.: A model for studies of tropospheric ozone and nonmethane hydrocarbons: Model description and ozone results, *J. Geophys. Res.*, 108D, 4294, doi:10.1029/2002JD002893, 2003.
- Wallington, T. J., Ammann, M., Cox, R. A., Crowley, J. N., Jenkin, M. E., Mellouki, A., Rossi, M. J., Troe, J., and Cox, B.: IUPAC task group on atmospheric chemical kinetic data evaluation, <http://iupac.pole-ether.fr>.
- Welz, O., Savee, J. D., Osborn, D. L., Vasu, S. S., Percival, C. J., Shallcross, D. E., and Taatjes, C. A.: Direct kinetic measurements of Criegee intermediate (CH<sub>2</sub>OO) formed by reaction of CH<sub>2</sub>I with O<sub>2</sub>, *Science*, 335, 204–207, doi:10.1126/science.1213229, 2012.
- Welz, O., Eskola, A. J., Sheps, L., Rotavera, B., Savee, J. D., Scheer, A. M., Osborn, D. L., Lowe, D., Booth, A. M., Xiao, P., Khan, M. A. H., Percival, C. J., Shallcross, D. E., and Taatjes, C. A.: Rate coefficients of C1 and C2 Criegee intermediate reactions with formic and acetic acid near the collision limit: Direct kinetics measurements and atmospheric implications, *Angew. Chem.*, 126, 4635–4638, doi:10.1002/ange.201400964, 2014.
- Wilhelm, E., Battino, R., and Wilcock, R. J.: Low-pressure solubility of gases in liquid water, *Chem. Rev.*, 77, 219–262, 1977.
- Wolfe, G. M., Thornton, J. A., Bouvier-Brown, N. C., Goldstein, A. H., Park, J.-H., McKay, M., Matross, D. M., Mao, J., Brune, W. H., LaFranchi, B. W., Browne, E. C., Min, K.-E., Wooldridge, P. J., Cohen, R. C., Crounse, J. D., Faloon, I. C., Gilman, J. B., Kuster, W. C., de Gouw, J. A., Huisman, A., and Keutsch, F. N.: The chemistry of atmosphere-forest exchange (CAFE) model - part 2: application to BEARPEX-2007 observations, *Atmos. Chem. Phys.*, 11, 1269–1294, doi:10.5194/acp-11-1269-2011, 2011.
- Worsnop, D. R., Zahniser, M. S., Kolb, C. E., Gardner, J. A., Watson, L. R., van Doren, J. M., Jayne, J. T., and Davidovits, P.: The temperature dependence of mass accommodation of SO<sub>2</sub> and H<sub>2</sub>O<sub>2</sub> on aqueous surfaces, *J. Phys. Chem.*, 93, 1159–1172, 1989.
- Yin, F., Grosjean, D., and Seinfeld, J. H.: Photooxidation of dimethyl sulfide and dimethyl disulfide. I: Mechanism development, *J. Atmos. Chem.*, 11, 309–364, 1990.
- Yoon, M.-C., Choi, Y. S., and Kim, S. K.: The OH production from the  $\pi - \pi^*$  transition of acetylacetone, *Chem. Phys. Lett.*, 300, 207–212, doi:10.1016/S0009-2614(98)01373-6, 1999.
- Zellner, R., Hartmann, D., Karthäuser, J., Rhäsa, D., and Weibring, G.: A laser photolysis/LIF study of the reactions of O(<sup>3</sup>P) atoms with CH<sub>3</sub> and CH<sub>3</sub>O<sub>2</sub> radicals, *J. Chem. Soc. Faraday Trans. 2*, 84, 549–568, doi:10.1039/f29888400549, 1988.
