# Supplementary material for: Oxidation processes in the Eastern Mediterranean atmosphere: Evidence from the Modelling of HO x Measurements over Cyprus
Source: Copernicus journal article supplement (doi:10.5194/acp-2018-25), 2018-02-14
Supplement: Supplementary file 1 [file acp-2018-25-supplement.zip › supplement.pdf]

## 1. Supplementary

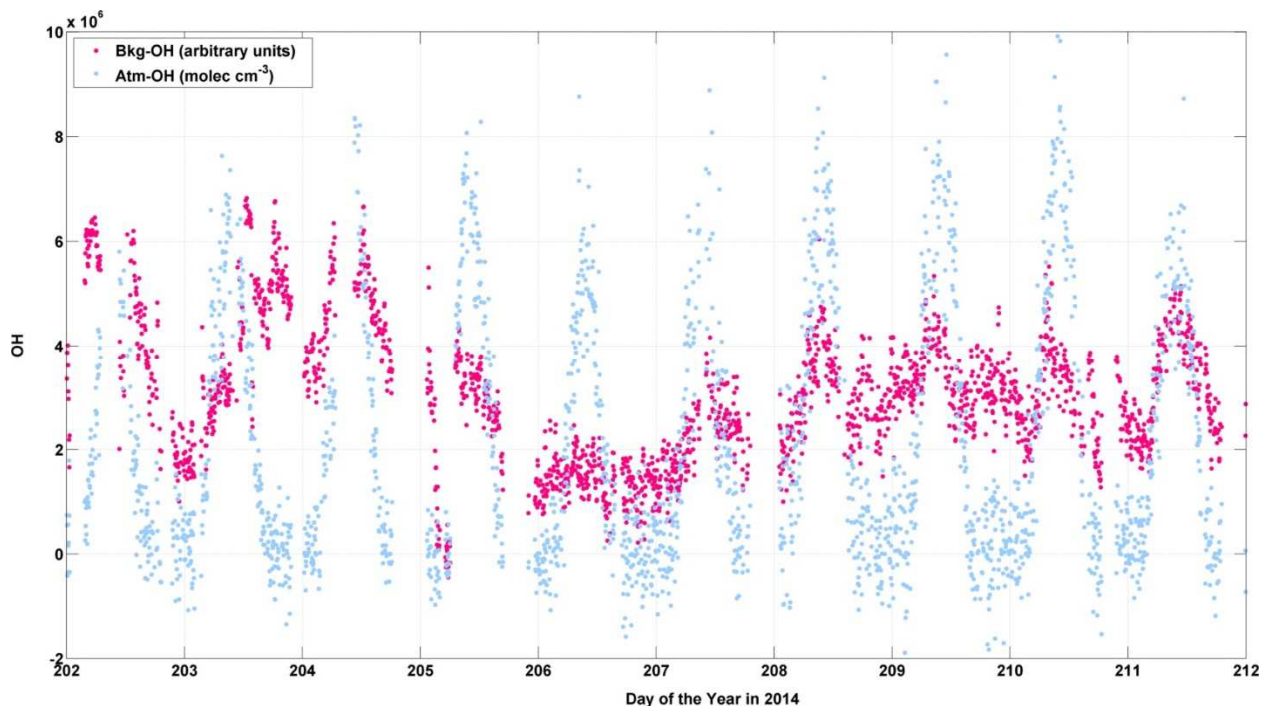

**Supplementary Figure 1:** Variation of atmospheric and background OH during CYPHEX. Background OH is in arbitrary units.

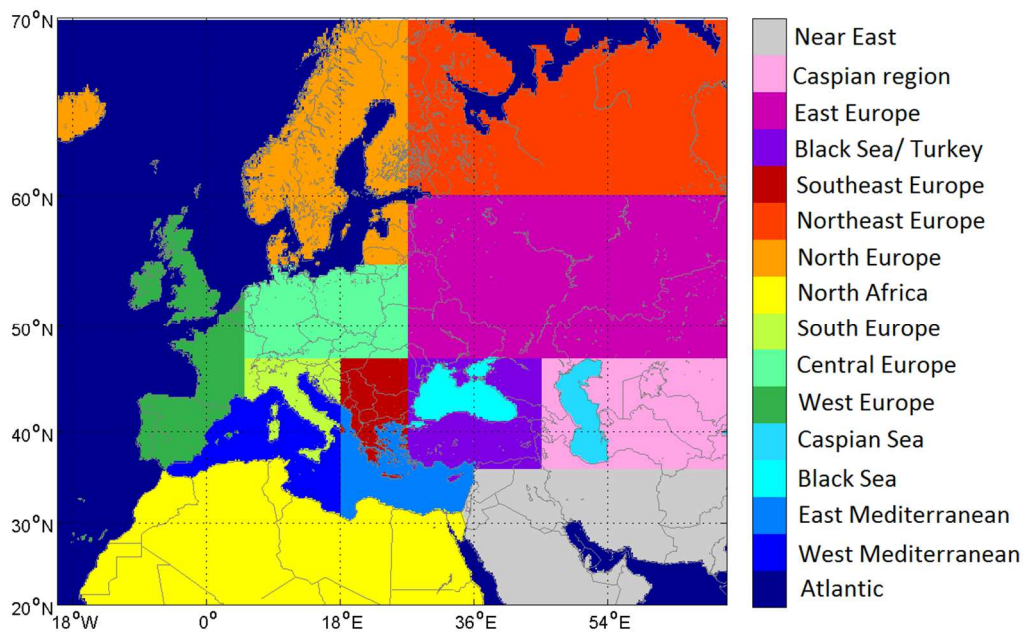

**Supplementary Figure 2:** Source regions identified by FlexPart.

Supplementary File1: Caaba/Mecca model scheme based on the Mainz Organic Mechanism (MOM).
